# Supplementary material for: A general platinum-catalyzed alkoxycarbonylation of olefins
Source: Royal Society of Chemistry journal article supplement (doi:10.1039/d0cc00650e), 2020-01-01

# Supporting Information

## A General Platinum-catalyzed Alkoxy carbonylation of Olefins

Ji Yang, Jiawang Liu, Yao Ge, Weiheng Huang, Carolin Schneider, Ricarda Dühren,

Robert Franke, Helfried Neumann, Ralf Jackstell, and Matthias Beller\*

\* Corresponding author. Email: [matthias.beller@catalysis.de](mailto:matthias.beller@catalysis.de)

### Contents

|                                                                                  |    |
|----------------------------------------------------------------------------------|----|
| S1. General information: Materials and methods.....                              | 2  |
| S2. General procedure of platinum catalysed alkoxy carbonylation of alkenes..... | 3  |
| S3. Optimisation of reaction conditions.....                                     | 4  |
| <i>Table S3.1. The effect of ligand.....</i>                                     | 4  |
| <i>Table S3.2. The effect of different metal catalyst precursors.....</i>        | 5  |
| <i>Table S3.3. The effect of Pt precursors.....</i>                              | 5  |
| <i>Table S3.4. The effect of acid.....</i>                                       | 6  |
| <i>Table S3.5. The effect of catalyst loading.....</i>                           | 6  |
| <i>Table S3.6. The effect of temperature.....</i>                                | 7  |
| S4. Kinetic monitoring experiment.....                                           | 8  |
| S5. Characterization of the products.....                                        | 9  |
| S6. NMR, GC and GC-MS spectra.....                                               | 19 |

## **S1. General information: Materials and methods**

All commercial reagents were ordered from Alfa Aesar, Aldrich, TCI or Strem. Unless otherwise stated, commercial reagents were used without purification. Air- and moisture-sensitive syntheses were performed under argon atmosphere in heating gun vacuum dried glassware. Analytical data of literature known compounds were in agree with reported data. NMR spectra were recorded on Bruker Avance 300 (300 MHz) or 400 (400 MHz) NMR spectrometers. Chemical shifts  $\delta$  (ppm) are given relative to solvent: references for  $\text{CDCl}_3$  were 7.26 ppm ( $^1\text{H}$  NMR) and 77.16 ppm ( $^{13}\text{C}$  NMR), for  $\text{CD}_2\text{Cl}_2$  were 5.32 ppm ( $^1\text{H}$  NMR) and 53.84 ppm ( $^{13}\text{C}$  NMR), for  $\text{d}_6$ -benzene were 7.16 ppm ( $^1\text{H}$  NMR) and 128.26 ppm ( $^{13}\text{C}$  NMR), and for  $\text{d}_8$ -toluene were 2.08 ppm ( $^1\text{H}$  NMR) and 20.43 ppm ( $^{13}\text{C}$  NMR). Signals were assigned as s (singlet), d (doublet), t (triplet), dd (doublet of doublet), m (multiplet) and br. s (broad singlet). All measurements were carried out at room temperature unless otherwise stated. Electron impact (EI) mass spectra were recorded on AMD 402 mass spectrometer (70 eV). High resolution mass spectra (HRMS) were recorded on Agilent 6210 Time-of-Flight LC/MS (Agilent) with electrospray ionization (ESI). The data are given as mass units per charge (m/z) and intensities of signals are given in brackets. For GC analyses, HP 6890 chromatograph with a 29 m HP5 column was used.

## S2. General procedure of platinum catalysed alkoxy carbonylation of alkenes

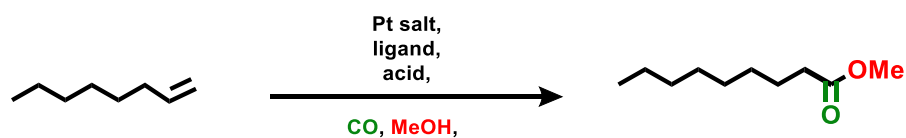

A 4 mL screw-cap vial was charged with platinum salt, ligand, acid, and an oven-dried stirring bar. The vial was closed by PTFE/white rubber septum (Wheaton 13 mm Septa) and phenolic cap and connected with atmosphere with a needle. Then, the vial was evacuated under vacuum and recharged with argon for three times. After MeOH and **1** were injected by syringe; the vial was fixed in an alloy plate and put into Paar 4560 series autoclave (300 mL) under argon atmosphere. At room temperature, the autoclave was flushed with carbon monoxide for three times and carbon monoxide was charged. The reaction was heated at the specified temperature. Afterwards, the autoclave was cooled to room temperature and the pressure was carefully released. Mesitylene was added into the reaction as internal standard. A sample of the mixture was analysed by gas chromatography. Pure products were obtained by column chromatography on silica gel.

### S3. Optimisation of reaction conditions

Table S3.1. The effect of ligand [a]

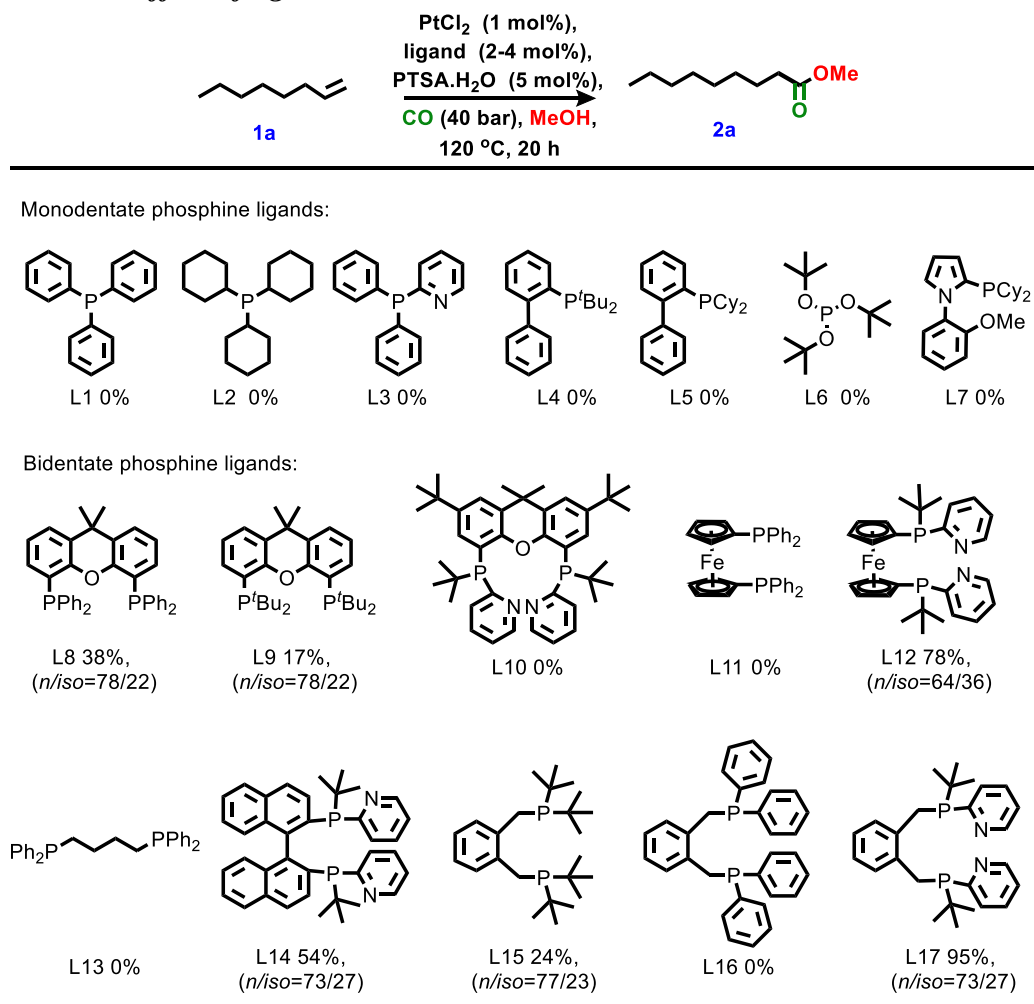

[a]. Standard reaction conditions: 1-Octene (1.0 mmol),  $\text{PtCl}_2$  (0.01 mmol, 1.0 mol%), ligands (for monodentate phosphine ligand: 0.04 mmol, 4.0 mol%; for bidentate phosphine ligand: 0.02 mmol, 2.0 mol%),  $\text{PTSA}\cdot\text{H}_2\text{O}$  (5.0 mol%), MeOH (2.0 mL), CO (40 atm), 120 °C, 20 h; The selectivity and yield were determined by GC analysis with mesitylene as the internal standard.



**Table S3.2. The effect of different metal catalyst precursors**

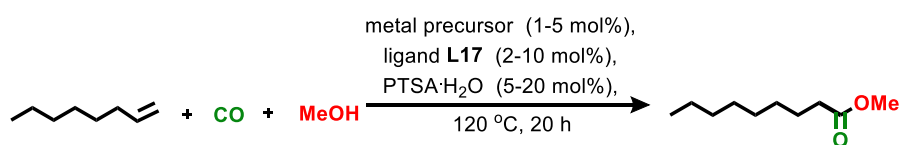

| Entry | Metal precursor                                         | Yield (%) | Selectivity (n/iso) |
|-------|---------------------------------------------------------|-----------|---------------------|
| 1.    | Fe <sub>3</sub> (CO) <sub>12</sub> [a]                  | 0         |                     |
| 2.    | Cu(CH <sub>3</sub> CN) <sub>4</sub> PF <sub>6</sub> [a] | 0         |                     |
| 3.    | [Ru(p-cym)Cl <sub>2</sub> ] <sub>2</sub> [b]            | 0         |                     |
| 4.    | Rh(cod)(acac) [b]                                       | 0         |                     |
| 5.    | PdCl <sub>2</sub> [b]                                   | 96        | 72/28               |
| 6.    | PtCl <sub>2</sub> [b]                                   | 95        | 73/27               |

[a]. Reaction conditions: 1-Octene (1.0 mmol), metal precursor (refer to Fe or Cu, 0.05 mmol, 5.0 mol%), ligand (0.1 mmol, 10.0 mol%), PTSA·H<sub>2</sub>O (20.0 mol%), MeOH (2.0 mL), CO (40 atm), 120 °C, 20 h; the selectivity and yield were determined by GC analysis with mesitylene as the internal standard. [b]. reaction conditions: 1-Octene (1.0 mmol), metal precursor (refer to Ru, Rh, Pd or Pt, 0.01 mmol, 1.0 mol%), ligand (0.02 mmol, 2.0 mol%), PTSA·H<sub>2</sub>O (5.0 mol%), MeOH (2.0 mL), CO (40 atm), 120 °C, 20 h; the selectivity and yield were determined by GC analysis with mesitylene as the internal standard.

**Table S3.3. The effect of Pt precursors**

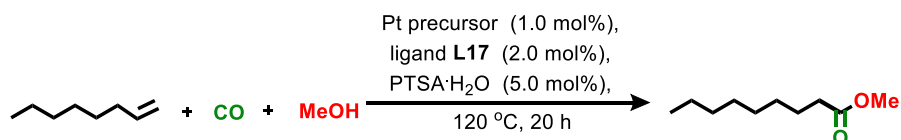

| Entry | Pt precursor           | Yield | Selectivity (n/iso) |
|-------|------------------------|-------|---------------------|
| 1.    | PtCl <sub>2</sub>      | 95    | 73/27               |
| 2.    | PtBr <sub>2</sub>      | 58    | 68/32               |
| 3.    | Pt(acac) <sub>2</sub>  | 98    | 79/21               |
| 4.    | Pt(cod)Cl <sub>2</sub> | 63    | 68/32               |

[a]. reaction conditions: 1-octene (1.0 mmol), Pt precursor (0.01 mmol, 1.0 mol%), ligand (0.02 mmol, 2.0 mol%), PTSA·H<sub>2</sub>O (5.0 mol%), MeOH (2.0 mL), CO (40 atm), 120 °C, 20 h; the selectivity and yield were determined by GC analysis with mesitylene as the internal standard.

**Table S3.4. The effect of acid [a]**

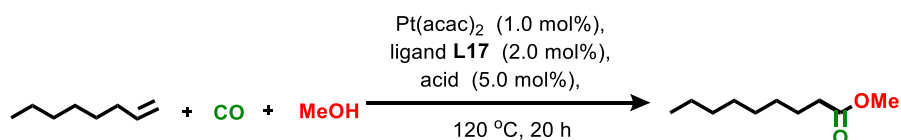

| Entry | Acid                           | Yield | Selectivity (n/iso) |
|-------|--------------------------------|-------|---------------------|
| 1.    | HCl, aqueous solution          | 65    | 70/30               |
| 2.    | CF <sub>3</sub> COOH           | 72    | 69/31               |
| 3.    | MSA                            | 93    | 77/23               |
| 4.    | CSA                            | 90    | 68/32               |
| 5.    | PTSA                           | 98    | 79/21               |
| 6.    | H <sub>2</sub> SO <sub>4</sub> | 67    | 71/29               |

[a]. reaction conditions: 1-octene (1.0 mmol), Pt(acac)<sub>2</sub> (0.01 mmol, 1.0 mol%), ligand (0.02 mmol, 2.0 mol%), acid (5.0 mol%), MeOH (2.0 mL), CO (40 atm), 120 °C, 20 h; the selectivity and yield were determined by GC analysis with mesitylene as the internal standard.

**Table S3.5. The effect of catalyst loading [a]**

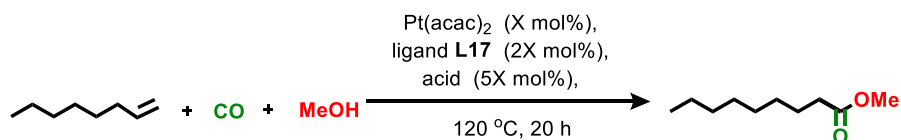

| Entry | Catalyst loading (Pt) | Yield | Selectivity (n/iso) |
|-------|-----------------------|-------|---------------------|
| 1.    | 0.1 mmol%             | 54    | 79/21               |
| 2.    | 0.2 mmol%             | 57    | 79/21               |
| 3.    | 0.5 mmol%             | 95    | 74/26               |
| 4.    | 1.0 mmol%             | 98    | 79/21               |

[a]. reaction conditions: 1-octene (1.0 mmol), Pt(acac)<sub>2</sub> (0.001-0.01 mmol, 0.1-1.0 mol%), ligand (0.02 mmol, 2.0 mol%), PTSA: H<sub>2</sub>O (5.0 mol%), MeOH (2.0 mL), CO (40 atm), 120 °C, 20 h; the selectivity and yield were determined by GC analysis with mesitylene as the internal standard.

**Table S3.6. The effect of temperature [a]**

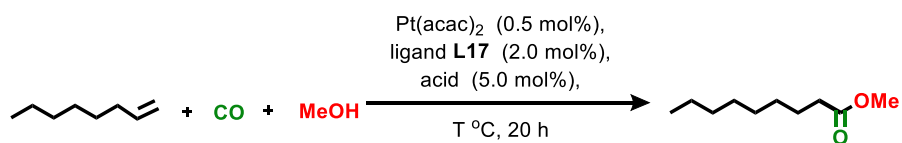

| Entry | Temperature (°C) | Yield | Selectivity ( <i>n/iso</i> ) |
|-------|------------------|-------|------------------------------|
| 1     | 120 °C           | 95    | 74/26                        |
| 2     | 60 °C            | trace |                              |

[a]. reaction conditions: 1-octene (1.0 mmol), Pt(acac)<sub>2</sub> (0.005 mmol, 0.5 mol%), ligand (0.02 mmol, 2.0 mol%), PTSA·H<sub>2</sub>O (5.0 mol%), MeOH (2.0 mL), CO (40 atm), 20 h; the selectivity and yield were determined by GC analysis with mesitylene as the internal standard.

## S4. Kinetic monitoring experiment

In order to understand the process in more detail, kinetic monitoring experiments were conducted. In general, all catalytic experiments an excess of ligand was used to ensure stability of the active complex at low metal concentration. By comparison, we observe that the Pd catalysed reaction is basically completed in about 2.5 hours; the rate of Pt-catalysed reaction is slower. It takes about 5.5 hours to complete the reaction. However, for 1-octene, the final yield of the product is the same for both catalysts.

**Figure S4. Kinetic monitoring experiment.**

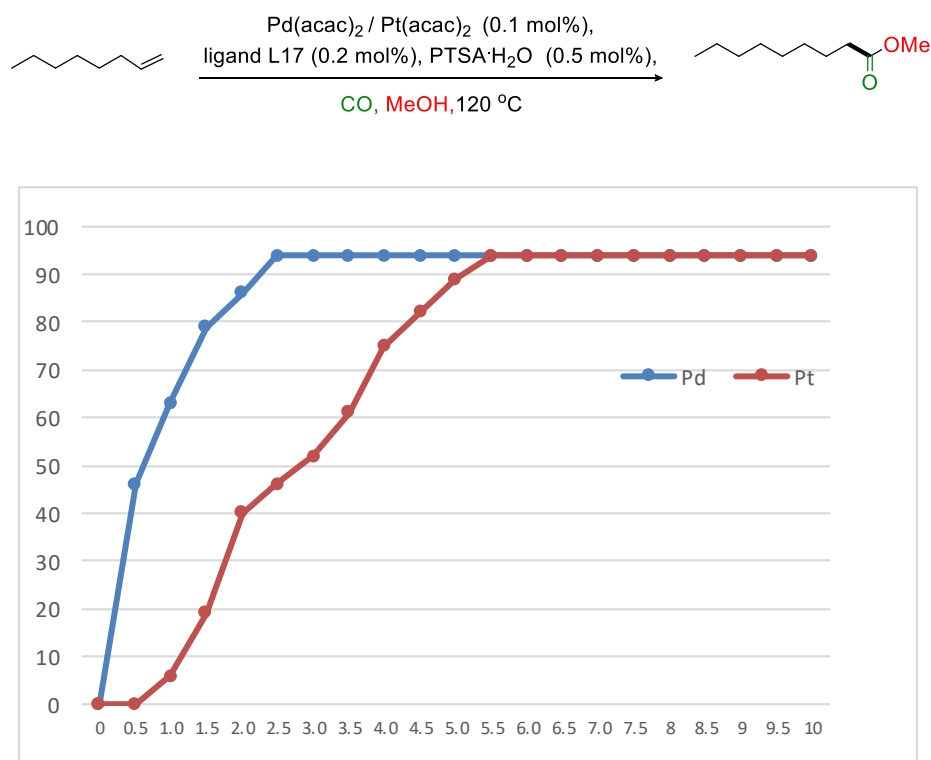

The X-axis represents the reaction time and the Y-axis represents the reaction yield. Reaction conditions: 1-octene (20 mmol), Pd(acac)<sub>2</sub> or Pt(acac)<sub>2</sub> (0.02 mmol, 0.1 mol%), ligand (0.04 mmol, 0.2 mol%), PTSA·H<sub>2</sub>O (0.5 mol%), MeOH (30 mL), CO (40 atm), 120 °C; the GC yield were determined by GC analysis with mesitylene as the internal standard.

## S5. Characterization of the products

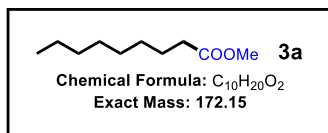

Colorless oil, 95% yield, *n*/*iso* = 74/26.

<sup>1</sup>H NMR (300 MHz, CDCl<sub>3</sub>) δ 3.66 (s, 3H), 2.34-2.24 (m, 2H), 1.67-1.54 (m, 2H), 1.34-1.19 (m, 10H), 0.92-0.79 (m, 3H) ppm;

<sup>13</sup>C NMR (75 MHz, CDCl<sub>3</sub>) δ 174.5, 51.6, 34.2, 32.0, 29.4, 29.3, 29.3, 25.1, 22.8, 14.2.

DEPT135-<sup>13</sup>C NMR (75 MHz, CDCl<sub>3</sub>) δ 51.6 (-), 34.3, 31.9, 29.4, 29.3, 29.3, 25.1, 22.8, 14.2 (-).

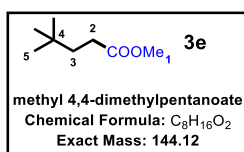

Colorless oil, 93% yield, *n*/*iso* > 99/1.

<sup>1</sup>H NMR (300 MHz, CDCl<sub>3</sub>) δ 3.65 (s, 3H), 2.31-2.21 (m, 2H), 1.58-1.48 (m, 2H), 0.88 (s, 9H) ppm;

<sup>13</sup>C NMR (75 MHz, CDCl<sub>3</sub>) δ 175.0, 51.6, 38.7, 30.2, 30.0, 29.1.

DEPT135-<sup>13</sup>C NMR (75 MHz, CDCl<sub>3</sub>) δ 51.6, 38.7 (-), 30.0 (-), 29.1.

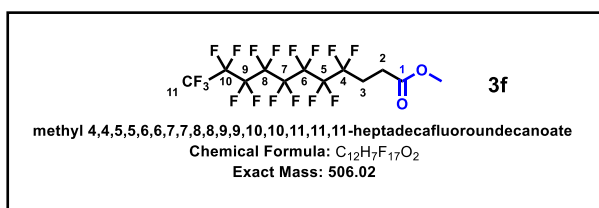

Colorless oil, 87% yield, *n*/*iso* > 99/1.

<sup>1</sup>H NMR (400 MHz, CDCl<sub>3</sub>) δ 3.67 (s, 3H), 2.62-2.52 (m, 2H), 2.51-2.32 (m, 2H) ppm;

<sup>13</sup>C NMR (101 MHz, CDCl<sub>3</sub>) δ 171.7, 120.7, 118.8, 118.1, 116.0, 113.8, 111.4, 111.1, 108.9, 108.5, 106.2, 52.0, 26.7, 25.3.

DEPT135-<sup>13</sup>C NMR (101 MHz, CDCl<sub>3</sub>) δ 52.0, 26.7 (-), 25.3 (-).

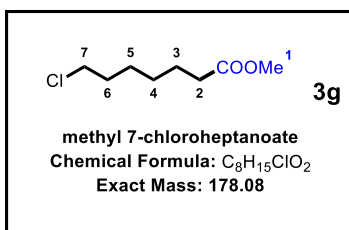

Colorless oil, 87% yield, *n*/*iso* = 66/34.

<sup>1</sup>H NMR (400 MHz, CDCl<sub>3</sub>) δ 3.59 (s, 3H), 3.49-3.39 (t, *J* = 6.7 Hz, 2H), 2.30-2.19 (m, 2H), 1.76-1.25 (m, 8H) ppm;

<sup>13</sup>C NMR (101 MHz, CDCl<sub>3</sub>) δ 174.0, 51.4, 44.9, 33.9, 32.4, 28.4, 26.5, 24.7.

DEPT135-<sup>13</sup>C NMR (101 MHz, CDCl<sub>3</sub>) δ 51.4, 44.9 (-), 33.9 (-), 32.4 (-), 28.4 (-), 26.5 (-), 24.7 (-).

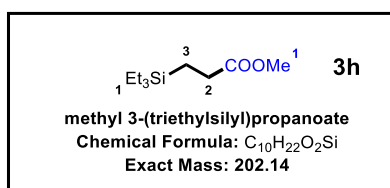

Colorless oil, 82% yield, *n*/*iso* = 99/1.

<sup>1</sup>H NMR (400 MHz, CDCl<sub>3</sub>) δ 3.64 (s, 3H), 2.32-2.18 (m, 2H), 1.02-0.77 (m, 11H), 0.58-0.44 (q, *J* = 7.9 Hz, 6H) ppm;

<sup>13</sup>C NMR (101 MHz, CDCl<sub>3</sub>) δ 175.6, 51.6, 28.6, 7.3, 6.6, 3.1.

DEPT135-<sup>13</sup>C NMR (101 MHz, CDCl<sub>3</sub>) δ 51.6, 28.6 (-), 7.3, 6.6 (-), 3.1 (-).

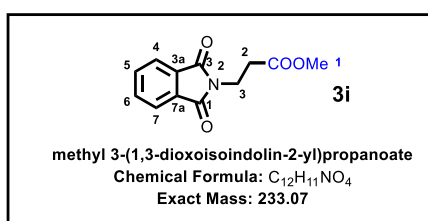

White solid, 77% yield, *n*/*iso* > 99/1.

<sup>1</sup>H NMR (400 MHz, CDCl<sub>3</sub>) δ 7.83-7.70 (m, 2H), 7.70-7.58 (m, 2H), 3.96-3.84 (t, *J* = 7.2 Hz, 2H), 3.60 (s, 3H), 2.73-2.60 (t, *J* = 7.2 Hz, 2H) ppm;

<sup>13</sup>C NMR (101 MHz, CDCl<sub>3</sub>) δ 171.2, 167.9, 134.0, 132.0, 123.3, 51.9, 33.8, 32.8.

DEPT135-<sup>13</sup>C NMR (101 MHz, CDCl<sub>3</sub>) δ 134.0, 123.3, 51.9, 33.8 (-), 32.8 (-).

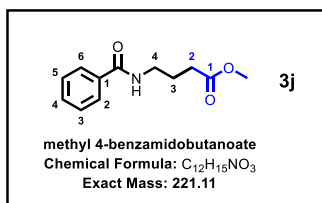

Colorless oil, 66% yield, *n*/*iso* = 68/32.

<sup>1</sup>H NMR (300 MHz, CDCl<sub>3</sub>) δ 7.79-7.70 (m, 2H), 7.43-7.24 (m, 4H), 3.56 (s, 3H), 3.45-3.32 (m, 2H), 2.38-2.27 (t, *J* = 7.2 Hz, 2H), 1.93-1.78 (m, 2H) ppm;

<sup>13</sup>C NMR (75 MHz, CDCl<sub>3</sub>) δ 173.9, 167.7, 134.4, 131.1, 128.2, 126.9, 51.5, 39.4, 31.5, 24.4.

DEPT135-<sup>13</sup>C NMR (75 MHz, CDCl<sub>3</sub>) δ 131.1, 128.2, 126.9, 51.5, 39.4 (-), 31.5 (-), 24.4 (-).

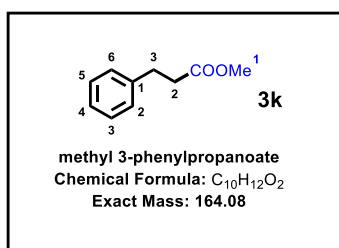

Colorless oil, 95% yield, *n*/*iso* = 71/29.

<sup>1</sup>H NMR (400 MHz, CDCl<sub>3</sub>) δ 7.37-7.24 (m, 5H), 3.71 (s, 3H), 3.07-2.95 (t, *J* = 7.8 Hz, 2H), 2.73-2.64 (m, 2H) ppm;

<sup>13</sup>C NMR (101 MHz, CDCl<sub>3</sub>) δ 173.1, 140.5, 128.4, 128.2, 126.2, 51.4, 35.6, 30.9.

DEPT135-<sup>13</sup>C NMR (101 MHz, CDCl<sub>3</sub>) δ 128.4, 128.2, 126.2, 51.4, 35.6 (-), 30.9 (-).

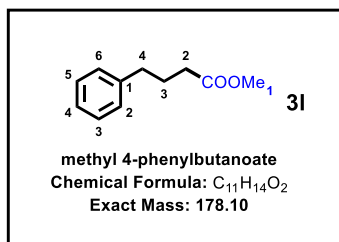

Colorless oil, 94% yield, *n*/*iso* = 65/35.

<sup>1</sup>H NMR (400 MHz, CDCl<sub>3</sub>) δ 7.34-7.22 (m, 5H), 3.70 (s, 3H), 2.75-2.62 (m, 2H), 2.45-2.33 (t, *J* = 7.5 Hz, 2H), 2.08-1.96 (m, 2H) ppm;

<sup>13</sup>C NMR (101 MHz, CDCl<sub>3</sub>) δ 173.7, 141.3, 128.4, 128.3, 125.9, 51.3, 35.1, 33.3, 26.4.

DEPT135-<sup>13</sup>C NMR (101 MHz, CDCl<sub>3</sub>) δ 128.5, 128.4, 126.0, 51.5, 35.2 (-), 33.4 (-), 26.6 (-).

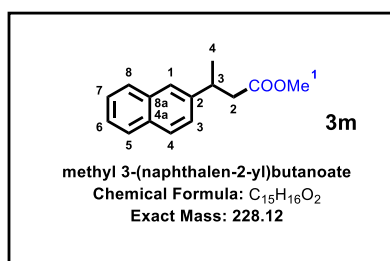

Light yellow solid, 97% yield, *n*/*iso* > 99/1.

<sup>1</sup>H NMR (400 MHz, CDCl<sub>3</sub>) δ 7.93-7.82 (m, 3H), 7.78-7.72 (m, 1H), 7.57-7.40 (m, 3H), 3.68 (s, 3H), 3.64-3.48 (m, 1H), 2.89-2.67 (m, 2H), 1.52-1.44 (d, *J* = 7.0 Hz, 3H) ppm;

<sup>13</sup>C NMR (101 MHz, CDCl<sub>3</sub>) δ 172.7, 143.1, 133.6, 132.3, 128.2, 127.6, 127.6, 125.9, 125.4, 125.4, 124.9, 51.4, 42.6, 36.5, 21.8.

DEPT135-<sup>13</sup>C NMR (101 MHz, CDCl<sub>3</sub>) δ 128.2, 127.6, 127.6, 125.9, 125.4, 125.4, 124.9, 51.4, 42.6 (-), 36.5, 21.8.

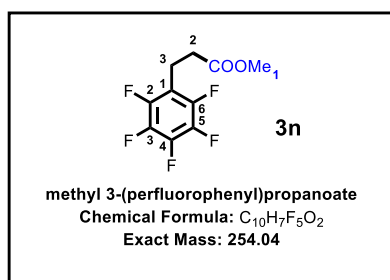

Colorless oil, 87% yield, *n*/*iso* > 99/1.

<sup>1</sup>H NMR (400 MHz, CDCl<sub>3</sub>) δ 3.65 (s, 3H), 3.03-2.95 (t, *J* = 7.7 Hz, 2H), 2.63-2.54 (t, *J* = 7.7 Hz, 2H) ppm;

<sup>13</sup>C NMR (101 MHz, CDCl<sub>3</sub>) δ 172.1, 146.5, 144.0, 141.3, 138.8, 136.3, 113.5, 51.8, 32.9, 18.0.

DEPT135-<sup>13</sup>C NMR (101 MHz, CDCl<sub>3</sub>) δ 51.8, 32.9 (-), 18.0 (-).

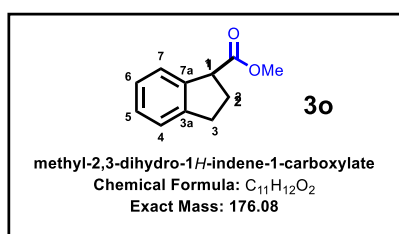

Colorless oil, 87% yield, *I*:2 = 88:12.

<sup>1</sup>H NMR (400 MHz, CDCl<sub>3</sub>) δ 7.55-7.46 (m, 1H), 7.39-7.22 (m, 3H), 4.20-4.10 (m, 1H), 3.82 (s, 3H), 3.24-2.95 (m, 2H), 2.60-2.37 (m, 2H) ppm;

<sup>13</sup>C NMR (101 MHz, CDCl<sub>3</sub>) δ 174.2, 144.0, 140.6, 127.5, 126.4, 124.7, 124.6, 51.9, 50.0, 31.7, 28.7.



DEPT135-<sup>13</sup>C NMR (101 MHz, CDCl<sub>3</sub>) δ 127.5 (-), 126.4 (-), 124.7 (-), 124.6 (-), 51.9 (-), 50.0 (-), 31.7, 28.7.

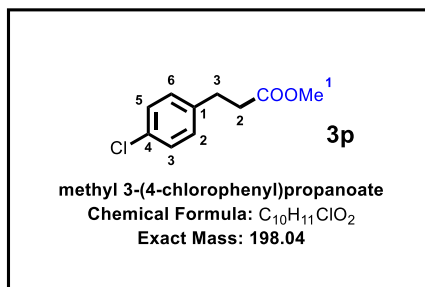

Colorless oil, 89% yield, *n*/*iso* = 71/29.

<sup>1</sup>H NMR (400 MHz, CDCl<sub>3</sub>) δ 7.25-7.21 (m, 2H), 7.15-7.09 (m, 2H), 3.65 (s, 3H), 2.91 (t, *J* = 7.7 Hz, 2H), 2.60 (t, *J* = 7.7 Hz, 2H) ppm;

<sup>13</sup>C NMR (101 MHz, CDCl<sub>3</sub>) δ 172.9, 138.9, 132.0, 129.6, 128.5, 51.5, 35.4, 30.2.

DEPT135-<sup>13</sup>C NMR (101 MHz, CDCl<sub>3</sub>) δ 129.6, 128.5, 51.5, 35.4 (-), 30.2 (-).

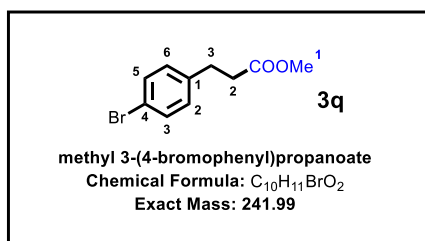

Colorless oil, 86% yield, *n*/*iso* = 72/28.

<sup>1</sup>H NMR (400 MHz, CDCl<sub>3</sub>) δ 7.40-7.34 (m, 2H), 7.09-7.03 (m, 2H), 3.65 (s, 3H), 2.89 (t, *J* = 7.7 Hz, 2H), 2.60 (t, *J* = 7.7 Hz, 2H) ppm;

<sup>13</sup>C NMR (101 MHz, CDCl<sub>3</sub>) δ 172.8, 139.4, 131.4, 130.0, 120.0, 51.5, 35.3, 30.2.

DEPT135-<sup>13</sup>C NMR (101 MHz, CDCl<sub>3</sub>) δ 131.4, 130.0, 51.5, 35.3 (-), 30.2 (-).

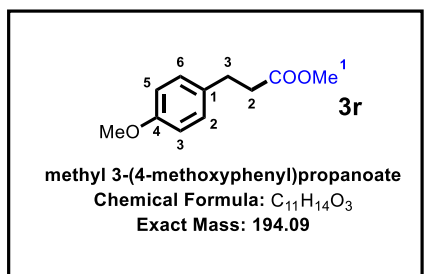

Colorless oil, 85% yield, *n*/*iso* = 52/48.

<sup>1</sup>H NMR (400 MHz, CDCl<sub>3</sub>) δ 7.17-7.09 (m, 2H), 6.91-6.86 (m, 2H), 3.78 (s, 3H), 3.68 (s, 3H), 2.92 (t, *J* = 7.8 Hz, 2H), 2.62 (t, *J* = 7.8 Hz, 2H) ppm;

<sup>13</sup>C NMR (101 MHz, CDCl<sub>3</sub>) δ 173.3, 158.0, 132.5, 129.2, 113.8, 55.1, 51.4, 35.9, 30.0.

DEPT135-<sup>13</sup>C NMR (101 MHz, CDCl<sub>3</sub>) δ 129.2, 113.8, 55.1, 51.4, 35.9(-), 30.0(-).

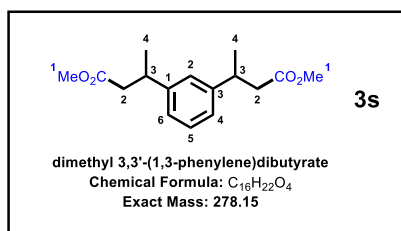

Colorless oil, 86% yield, *n*/*iso* > 99/1.

<sup>1</sup>H NMR (400 MHz, CDCl<sub>3</sub>) δ 7.30-7.19 (m, 1H), 7.12-7.01 (m, 3H), 3.63 (s, 6H), 3.36-3.19 (m, 2H), 2.70-2.46 (m, 4H), 1.30 (d, *J* = 7.0 Hz, 6H) ppm;

<sup>13</sup>C NMR (101 MHz, CDCl<sub>3</sub>) δ 172.8, 145.9, 128.7, 125.4, 124.7, 51.5, 42.8, 36.5, 21.7.

DEPT135-<sup>13</sup>C NMR (101 MHz, CDCl<sub>3</sub>) δ 128.7 (-), 125.4 (-), 124.7 (-), 51.5 (-), 42.8, 36.5(-), 21.7(-).

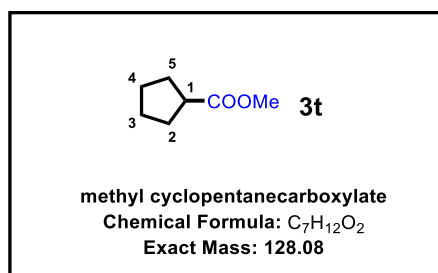

Colorless oil, 97% yield.

<sup>1</sup>H NMR (300 MHz, CDCl<sub>3</sub>) δ 3.65 (s, 3H), 2.79-2.63 (m, 1H), 1.93-1.48 (m, 8H) ppm;

<sup>13</sup>C NMR (75 MHz, CDCl<sub>3</sub>) δ 177.4, 51.7, 43.8, 30.1, 25.9.

DEPT135-<sup>13</sup>C NMR (75 MHz, CDCl<sub>3</sub>) δ 51.7 (-), 43.8 (-), 30.1, 25.9.

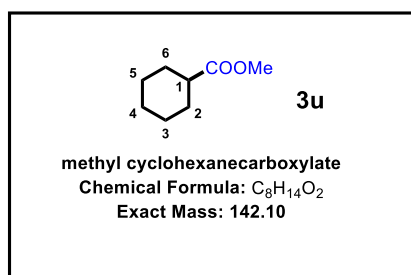

Colorless oil, 96% yield.

<sup>1</sup>H NMR (300 MHz, CDCl<sub>3</sub>) δ 3.60 (s, 3H), 2.32-2.17 (m, 1H), 1.92-1.76 (m, 2H), 1.74-1.13 (m, 8H) ppm;

<sup>13</sup>C NMR (75 MHz, CDCl<sub>3</sub>) δ 176.5, 51.4, 43.1, 29.1, 25.8, 25.5.

DEPT135-<sup>13</sup>C NMR (75 MHz, CDCl<sub>3</sub>) δ 51.4 (-), 43.1 (-), 29.1, 25.8, 25.5.

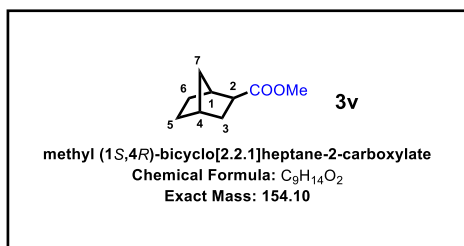

Colorless oil, 88% yield.

<sup>1</sup>H NMR (400 MHz, CDCl<sub>3</sub>) δ 3.61 (s, 3H), 2.48-2.39 (m, 1H), 2.32-2.19 (m, 2H), 1.85-1.72 (m, 1H), 1.54-1.36 (m, 4H), 1.22-1.06 (m, 3H) ppm;

<sup>13</sup>C NMR (101 MHz, CDCl<sub>3</sub>) δ 176.5, 51.6, 46.4, 41.0, 36.5, 36.1, 34.2, 29.5, 28.7.

DEPT135-<sup>13</sup>C NMR (101 MHz, CDCl<sub>3</sub>) δ 51.6 (-), 46.4 (-), 40.9 (-), 36.5, 36.1 (-), 34.2, 29.5, 28.7.

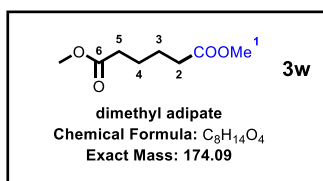

Colorless oil, 98% yield, *n*/*iso* = 69/31.

<sup>1</sup>H NMR (400 MHz, CDCl<sub>3</sub>) δ 3.65 (s, 6H), 2.36-2.27 (m, 4H), 1.68-1.60 (m, 4H), ppm;

<sup>13</sup>C NMR (101 MHz, CDCl<sub>3</sub>) δ 173.9, 77.5, 77.2, 76.8, 51.7, 33.8, 24.5.

DEPT135-<sup>13</sup>C NMR (101 MHz, CDCl<sub>3</sub>) δ 51.7 (-), 33.8, 24.5.

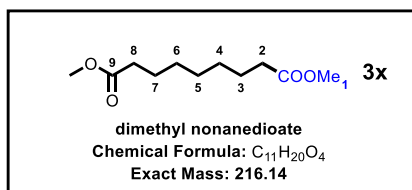

Colorless oil, 88% yield, *n*/*iso* = 42/58.

<sup>1</sup>H NMR (400 MHz, CDCl<sub>3</sub>) δ 3.56 (s, 6H), 2.20 (t, *J* = 7.5 Hz, 4H), 1.52 (m, 4H), 1.28-1.17 (m, 6H) ppm;

<sup>13</sup>C NMR (101 MHz, CDCl<sub>3</sub>) δ 174.0, 51.3, 33.9, 28.9, 28.8, 24.8.

DEPT135-<sup>13</sup>C NMR (101 MHz, CDCl<sub>3</sub>) δ 51.3, 33.9 (-), 28.8 (-), 24.8 (-).

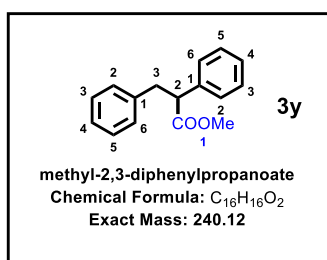

Light yellow solid, 89% yield.

$^1\text{H}$  NMR (400 MHz,  $\text{CDCl}_3$ )  $\delta$  7.26-6.95 (m, 10H), 3.78 (dd,  $J = 8.8, 6.7$  Hz, 1H), 3.52 (s, 3H), 3.40-3.27 (m, 1H), 2.95 (dd,  $J = 13.7, 6.7$  Hz, 1H) ppm;

$^{13}\text{C}$  NMR (101 MHz,  $\text{CDCl}_3$ )  $\delta$  173.9, 139.2, 138.8, 129.0, 128.8, 128.5, 128.1, 127.5, 126.5, 53.7, 52.1, 40.0.

DEPT135- $^{13}\text{C}$  NMR (101 MHz,  $\text{CDCl}_3$ )  $\delta$  129.0, 128.8, 128.5, 128.1, 127.5, 126.5, 53.7, 52.1, 39.9 (-).

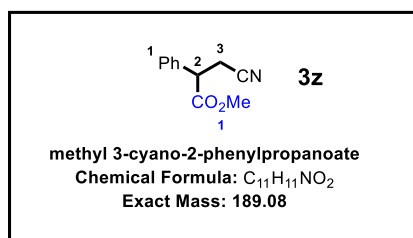

Colorless oil, 84% yield,  $n_{\text{iso}} = 78/22$ .

$^1\text{H}$  NMR (400 MHz,  $\text{CDCl}_3$ )  $\delta$  7.48-7.21 (m, 5H), 3.97 (t,  $J = 7.6$  Hz, 1H), 3.74 (s, 3H), 3.05 (dd,  $J = 16.8, 7.5$  Hz, 1H), 2.82 (dd,  $J = 16.8, 7.6$  Hz, 1H) ppm;

$^{13}\text{C}$  NMR (101 MHz,  $\text{CDCl}_3$ )  $\delta$  171.5, 135.8, 129.3, 128.6, 127.6, 117.6, 52.8, 47.6, 21.7.

DEPT135- $^{13}\text{C}$  NMR (101 MHz,  $\text{CDCl}_3$ )  $\delta$  129.3, 128.6, 127.6, 52.8, 47.6, 21.7 (-).

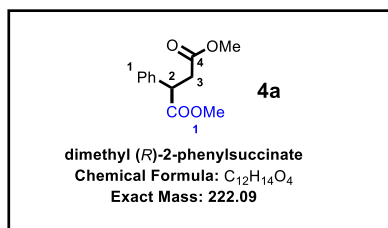

Colorless oil, 86% yield, 2:3 = 95:5.

$^1\text{H}$  NMR (400 MHz,  $\text{CDCl}_3$ )  $\delta$  7.38-7.20 (m, 5H), 4.15-4.05 (m, 1H), 3.66 (s, 6H), 3.27-3.14 (m, 1H), 2.67 (dd,  $J = 17.0, 5.2$  Hz, 1H) ppm;

$^{13}\text{C}$  NMR (101 MHz,  $\text{CDCl}_3$ )  $\delta$  173.4, 171.9, 144.1, 128.9, 127.7, 127.6, 52.3, 51.8, 47.1, 37.6.

DEPT135- $^{13}\text{C}$  NMR (101 MHz,  $\text{CDCl}_3$ )  $\delta$  128.9, 127.7, 127.6, 52.3, 51.5, 46.3, 37.6 (-).

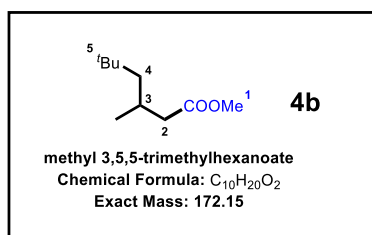

Colorless oil, 94% yield,  $n_{\text{iso}} > 99/1$ .

$^1\text{H}$  NMR (400 MHz,  $\text{CDCl}_3$ )  $\delta$  3.63 (s, 3H), 2.33-2.23 (m, 1H), 2.15-2.06 (m, 1H), 2.06-1.93 (m, 1H), 1.21 (dd,  $J = 14.0, 4.0$  Hz, 1H), 1.09 (dd,  $J = 14.1, 6.3$  Hz, 1H), 0.97-0.92 (d, 3H), 0.88 (s, 9H) ppm;

$^{13}\text{C}$  NMR (101 MHz,  $\text{CDCl}_3$ )  $\delta$  173.7, 51.4, 50.6, 43.9, 31.2, 30.0, 27.1, 22.8.

DEPT135- $^{13}\text{C}$  NMR (101 MHz,  $\text{CDCl}_3$ )  $\delta$  51.4, 50.6 (-), 43.9 (-), 30.0, 27.1, 22.8.

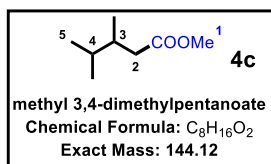

Colorless oil, 70% yield,  $n_{\text{iso}} > 99/1$ .

$^1\text{H}$  NMR (400 MHz,  $\text{CDCl}_3$ )  $\delta$  3.63 (s, 3H), 2.32 (dd,  $J = 14.6, 5.2$  Hz, 1H), 2.05 (dd,  $J = 14.6, 9.1$  Hz, 1H), 1.92-1.75 (m, 1H), 1.62- 1.45 (m, 1H), 0.89-0.77 (m, 9H) ppm;

$^{13}\text{C}$  NMR (101 MHz,  $\text{CDCl}_3$ )  $\delta$  174.3, 51.5, 39.1, 36.0, 32.2, 19.9, 18.4, 15.9.

DEPT135- $^{13}\text{C}$  NMR (101 MHz,  $\text{CDCl}_3$ )  $\delta$  51.5, 39.1 (-), 36.0, 32.2, 19.9, 18.3, 15.9.

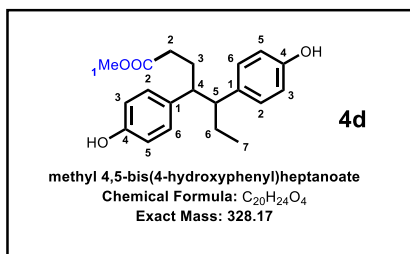

White solid, 32% yield,  $n_{\text{iso}} = 90/10$ .

For this product, linear and branched products were not easily separated by column chromatography and we obtained a mixture of products. The ratio of linear and branched products is determined by GC. Corresponding low-resolution mass spectra,  $^{13}\text{C}$  characteristic peaks were compared to the known spectra. For the  $^1\text{H}$  spectrum, here we list the spectrum of the mixture products.

$^1\text{H}$  NMR (400 MHz,  $\text{CDCl}_3$ )  $\delta$  6.98-6.82 (m, 6H), 6.76-6.52 (m, 8H), 4.12-3.99 (m, 1H), 3.58-3.47 (s, 1.45 H), 3.47-3.35 (s, 2.94H), 2.70-2.31 (m, 3.04H), 2.15-1.78 (m, 5.62H), 1.24-1.11 (m, 3.38H), 0.67-0.59 (t,  $J = 7.2$  Hz, 1H), 0.51-0.40 (t,  $J = 7.3$  Hz, 3H) ppm;

$^{13}\text{C}$  NMR (101 MHz,  $\text{CDCl}_3$ )  $\delta$  175.7, 175.6, 154.4, 154.2, 154.1, 153.8, 135.6, 135.0, 134.1, 133.3, 130.1, 130.0, 129.3, 115.5, 115.3, 114.8, 114.6, 77.5, 77.2, 76.8, 61.0, 53.6, 52.7, 51.9, 51.8, 51.0, 50.0, 32.6, 32.1, 29.7, 28.2, 27.4, 26.0, 21.1, 14.1, 12.4, 12.2.

DEPT135- $^{13}\text{C}$  NMR (101 MHz,  $\text{CDCl}_3$ )  $\delta$  130.1, 130.0, 129.3, 115.5, 115.3, 114.8, 114.6, 61.0, 53.6, 52.7, 51.9, 51.8, 51.0, 50.0, 32.6, 32.6, 29.7, 28.6, 27.4, 26.0, 21.1, 14.1, 12.4, 12.2.

## References

- [1] K. Dong, X. Fang, S. Gülak, R. Franke, A. Spannenberg, H. Neumann, R. Jackstell, M. Beller, *Nat. Commun.* 2017, **8**, 14117-14123;
- [2] H. Tomioka, H. Miyagawa, *J. Chem. Soc., Chem. Commun.*, **1988**, 1183-1184;
- [3] Q. Liu, L. Wu, H. Jiao, X. Fang, R. Jackstell, M. Beller, *Angew. Chem. Int. Ed.* **2013**, *52*, 8064-8068;
- [4] P. H. Gehrtz, V. Hirschbeck, I. Fleischer, *Chem. Commun.*, **2015**, *51*, 12574-12577;
- [5] K. Dong, R. Sang, J. Liu, R. Razzaq, R. Franke, R. Jackstell, M. Beller, *Angew. Chem. Int. Ed.* **2017**, *56*, 6203-6207;
- [6] L. Bencze, A. Kraut-Vass, L. Prókai, *J. Chem. Soc., Chem. Commun.*, **1985**, 911-912;
- [7] E. Drent, P. Arnoldy, H. M. Budzelaar, *J. Organomet. Chem.* **1993**, *455*, 247-253;
- [8] M. Calmes, F. Escale, J. Martinez, *Tetrahedron: Asymmetry*, **2002**, *13*, 293-296;
- [9] F. Fini, M. Beltrani, R. Mancuso, B. Gabriele, Carla Carfagna, *Adv. Synth. Catal.* **2015**, *357*, 177-184;
- [10] J. Yang, J. Liu, H. Neumann, R. Franke, R. Jackstell, M. Beller, *Science*, 2019, **366**, 1514-1517;

## S6. NMR, GC and GC-MS spectra:

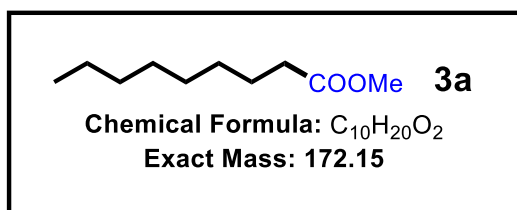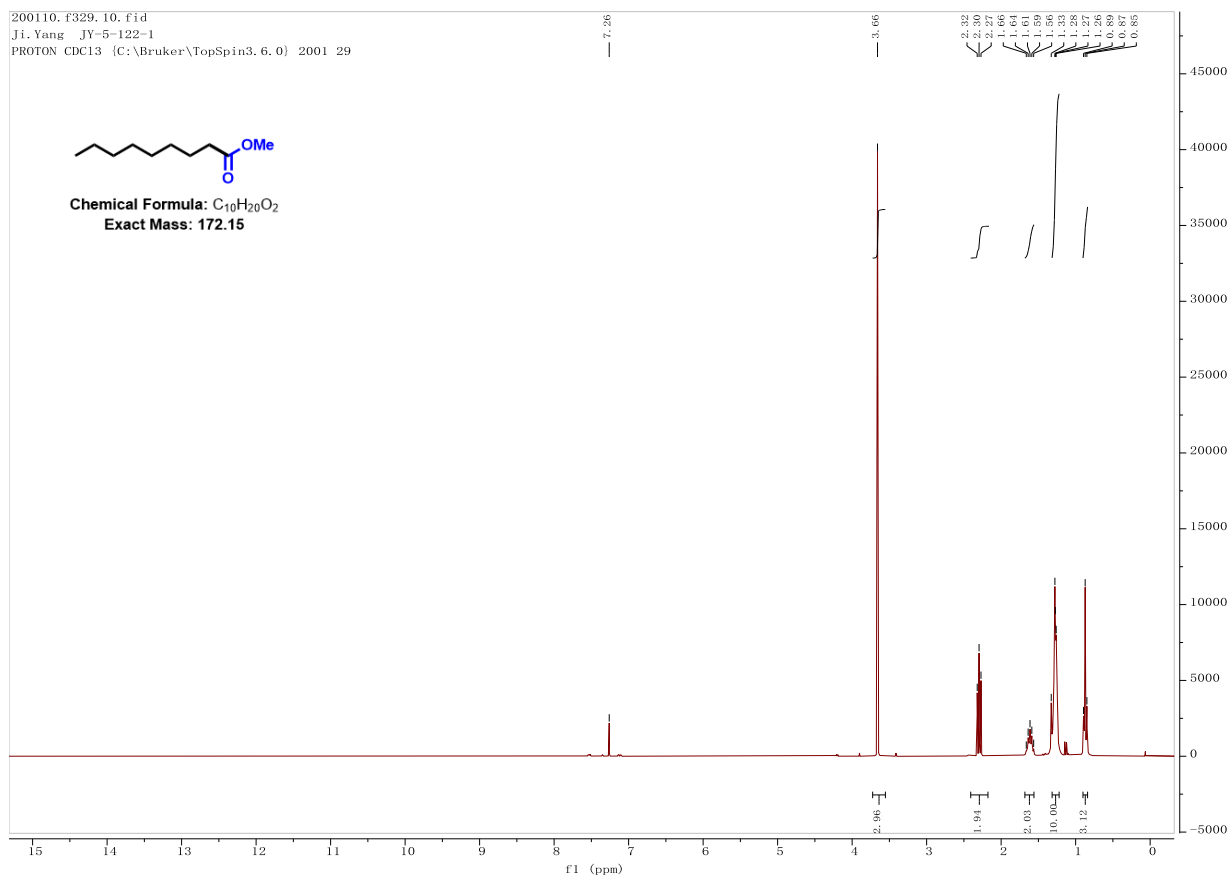

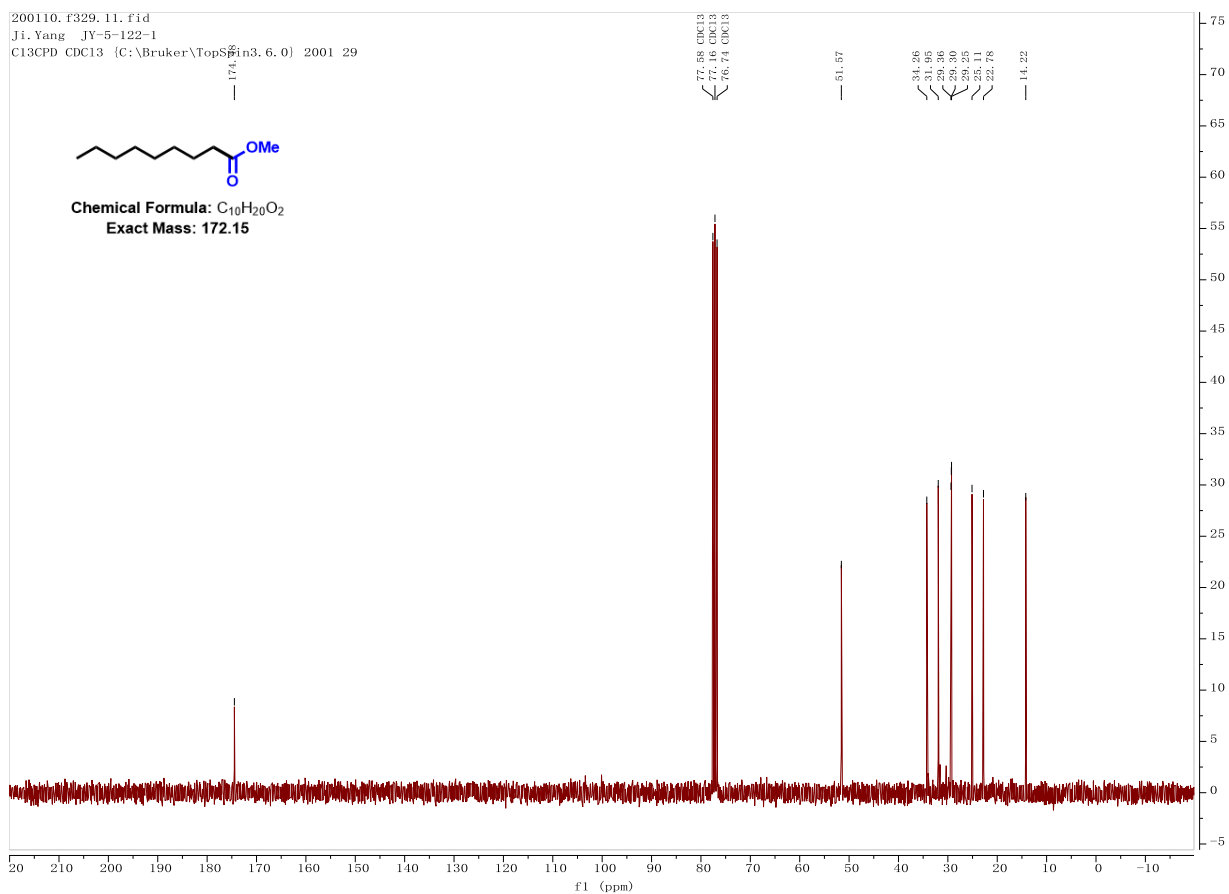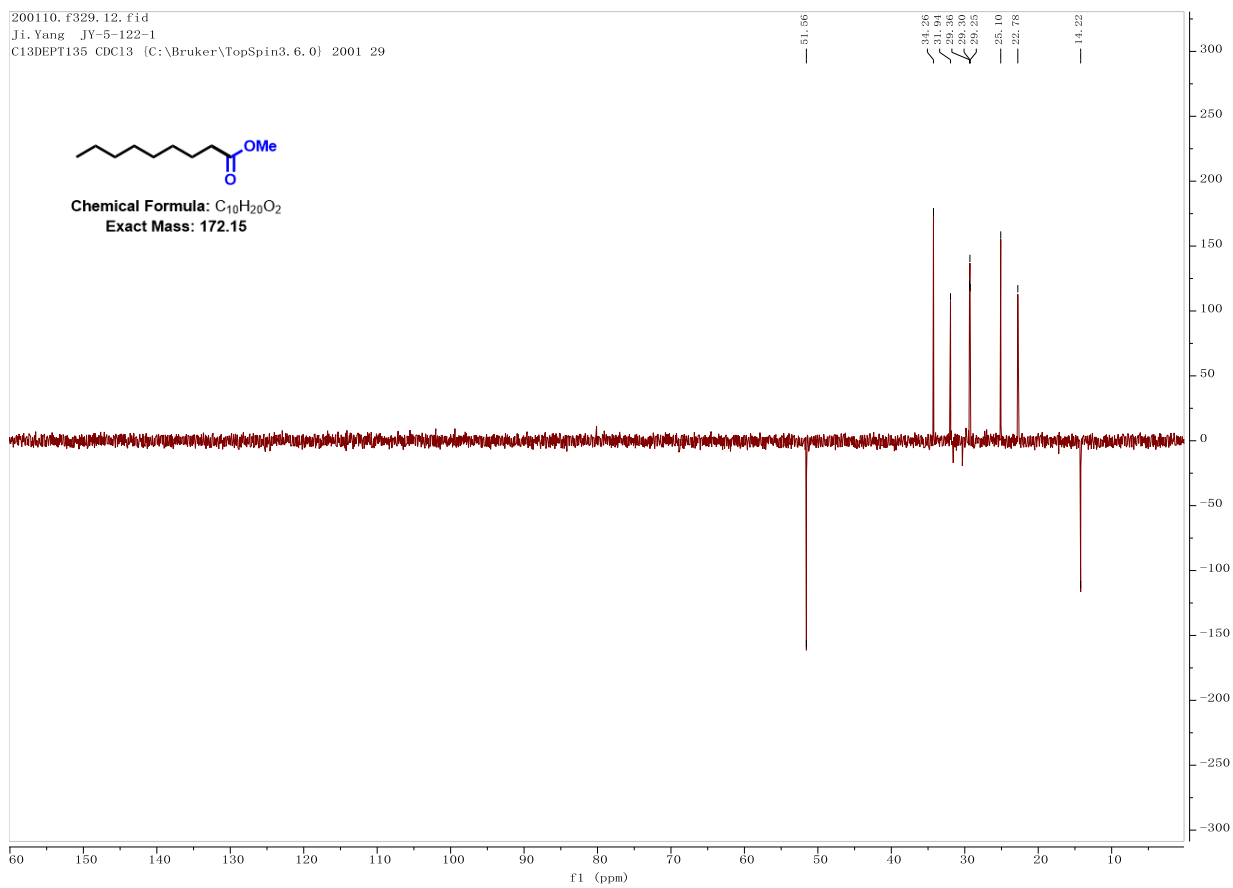



### Chromatogram and Results

| Injection Details    |                 |                         |
|----------------------|-----------------|-------------------------|
| Injection Name:      | JY-5-122-1      | Run Time (min): 40,00   |
| Vial Number:         | 61              | Injection Volume: 2,00  |
| Injection Type:      | Unknown         | Channel: FrontDetector  |
| Calibration Level:   |                 | Wavelength: n.a.        |
| Instrument Method:   | dong-40min      | Bandwidth: n.a.         |
| Processing Method:   | dong            | Dilution Factor: 1,0000 |
| Injection Date/Time: | 09.Jan.20 15:22 | Sample Weight: 1,0000   |

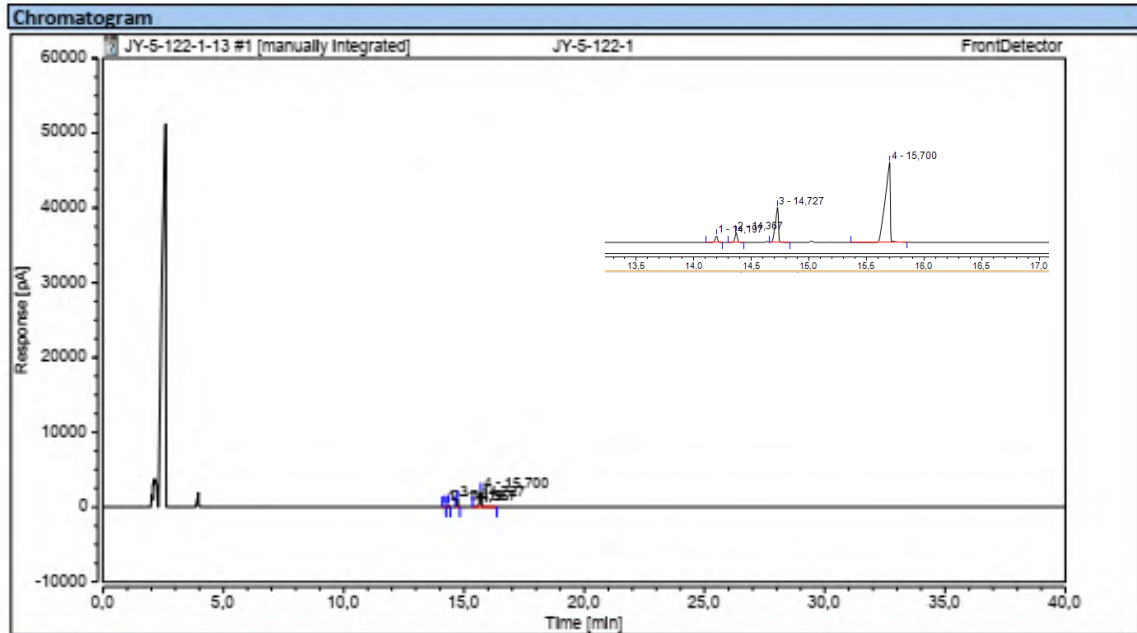

| Integration Results |             |                    |                |                 |                 |                   |        |
|---------------------|-------------|--------------------|----------------|-----------------|-----------------|-------------------|--------|
| No.                 | Peak Name   | Retention Time min | Area pA*min    | Height pA       | Relative Area % | Relative Height % | Amount |
| n.a.                | Component 2 | n.a.               | n.a.           | n.a.            | n.a.            | n.a.              | n.a.   |
| n.a.                | Component 3 | n.a.               | n.a.           | n.a.            | n.a.            | n.a.              | n.a.   |
| 1                   |             | 14,197             | 3,643          | 155,521         | 2,77            | 5,08              | n.a.   |
| 2                   |             | 14,367             | 5,439          | 232,981         | 4,13            | 7,61              | n.a.   |
| 3                   |             | 14,727             | 25,100         | 809,661         | 19,07           | 26,46             | n.a.   |
| 4                   |             | 15,700             | 97,436         | 1861,618        | 74,03           | 60,84             | n.a.   |
| n.a.                | Component 4 | n.a.               | n.a.           | n.a.            | n.a.            | n.a.              | n.a.   |
| n.a.                | Component 5 | n.a.               | n.a.           | n.a.            | n.a.            | n.a.              | n.a.   |
| <b>Total:</b>       |             |                    | <b>131,618</b> | <b>3059,782</b> | <b>100,00</b>   | <b>100,00</b>     |        |

File :D:\MSDCHEM\1\DATA\2001\JY-5-122-1.D  
Operator :  
Acquired : 9 Jan 2020 15:18 using AcqMethod SK3-30X.M  
Instrument : GC-MSD  
Sample Name: JY-5-122-1  
Misc Info :  
Vial Number: 36

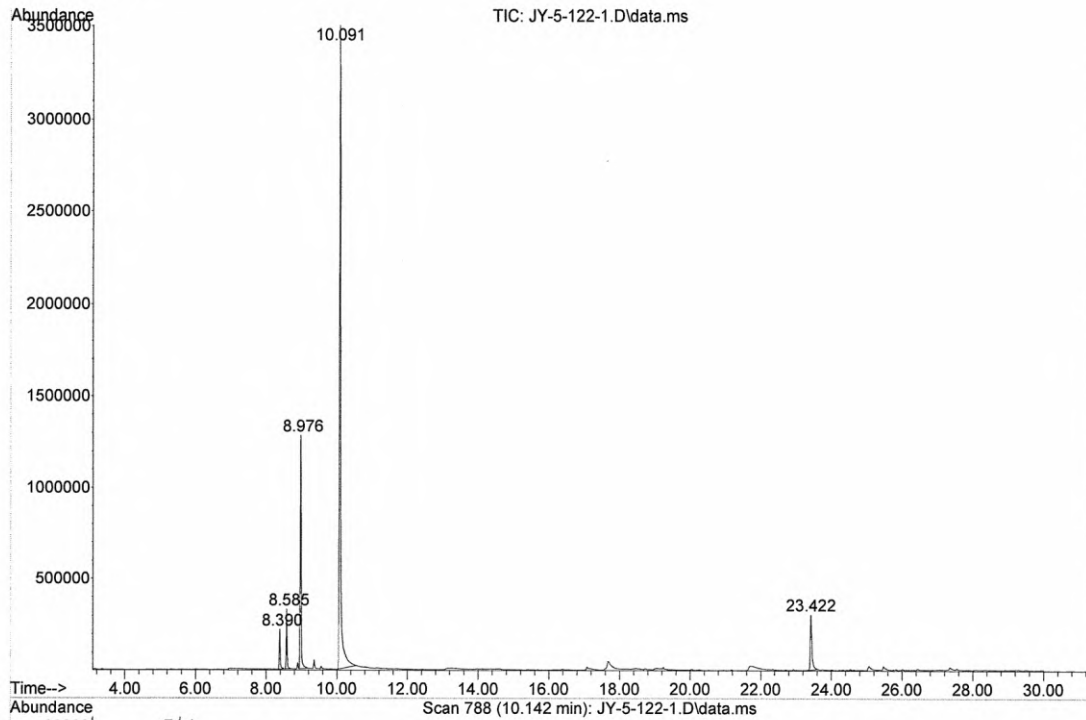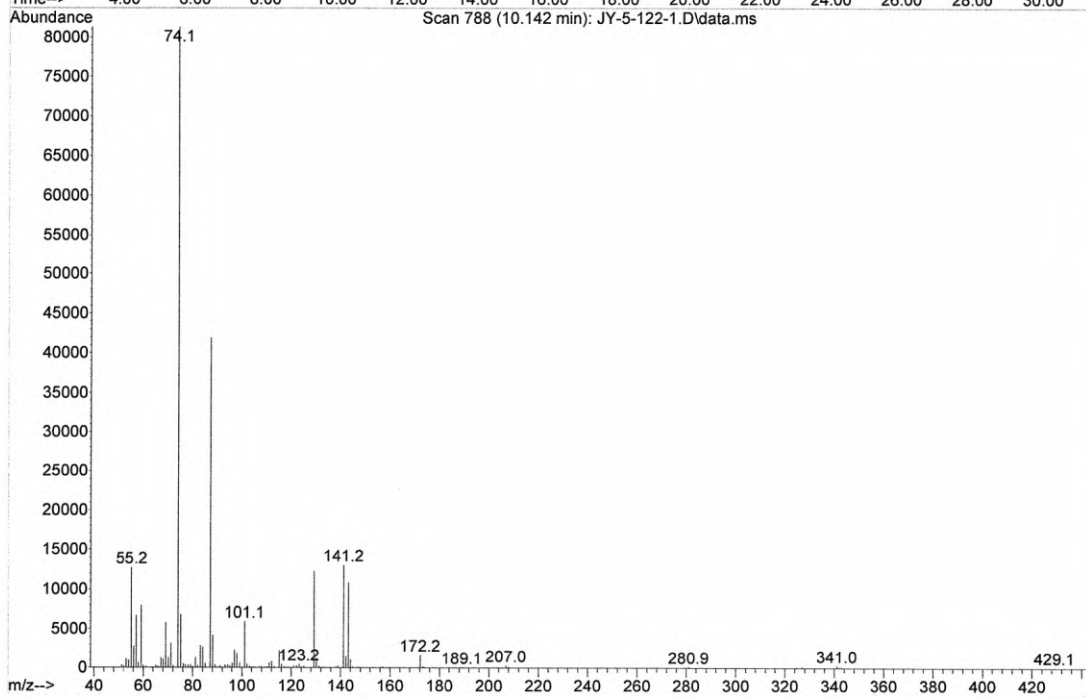

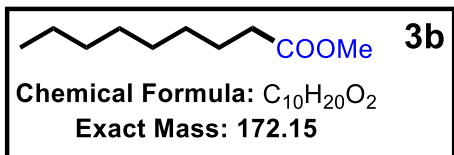

200110.f330.10.fid  
 Ji. Yang JY-5-122-2  
 PROTON CDCl3 [C:\Bruker\TopSpin3.6.0] 2001 30

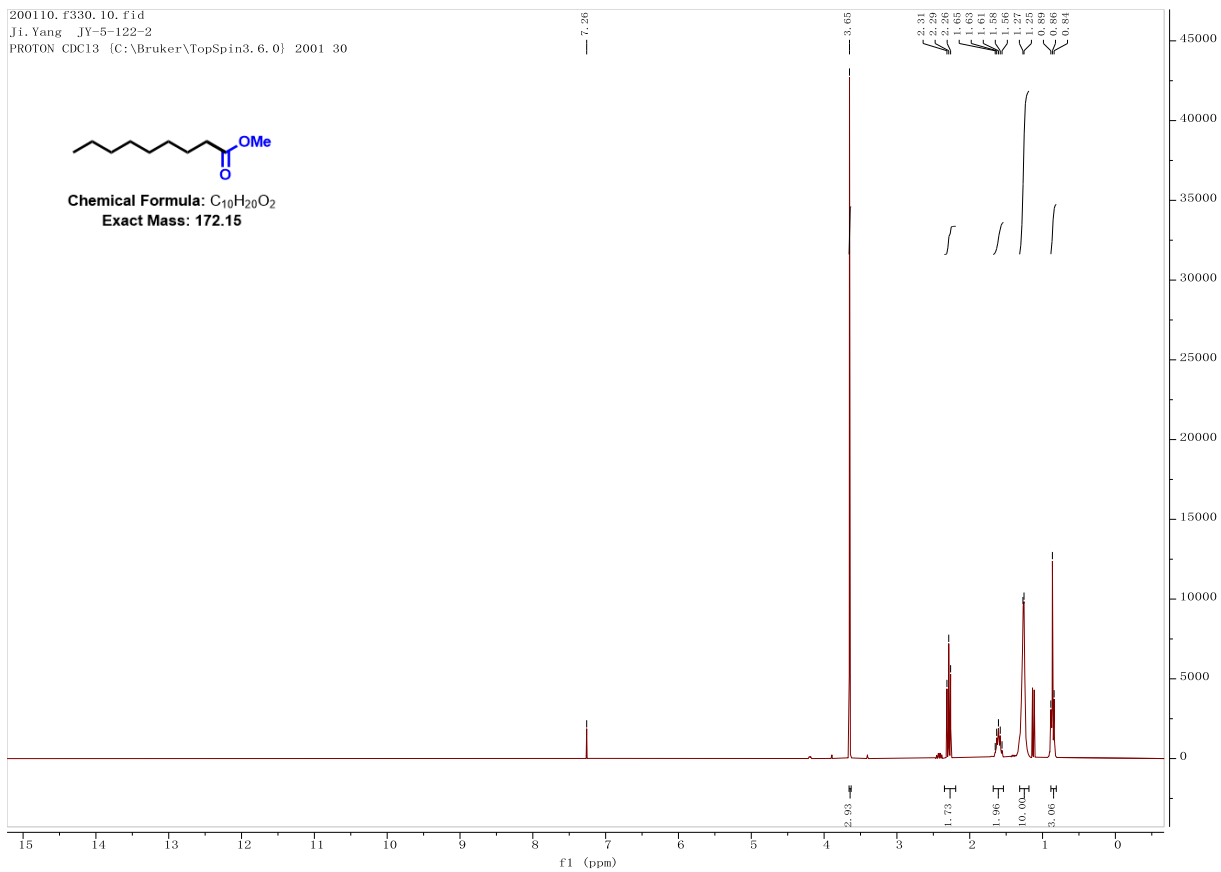

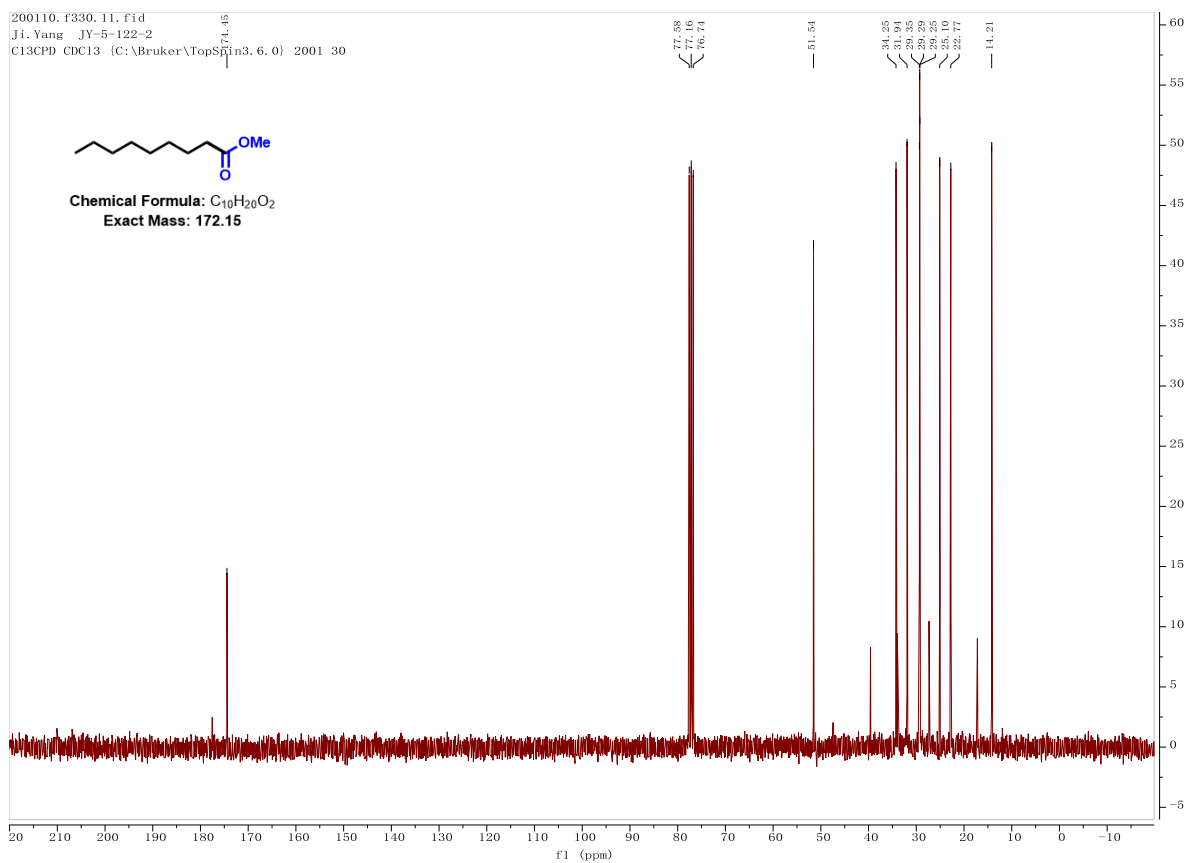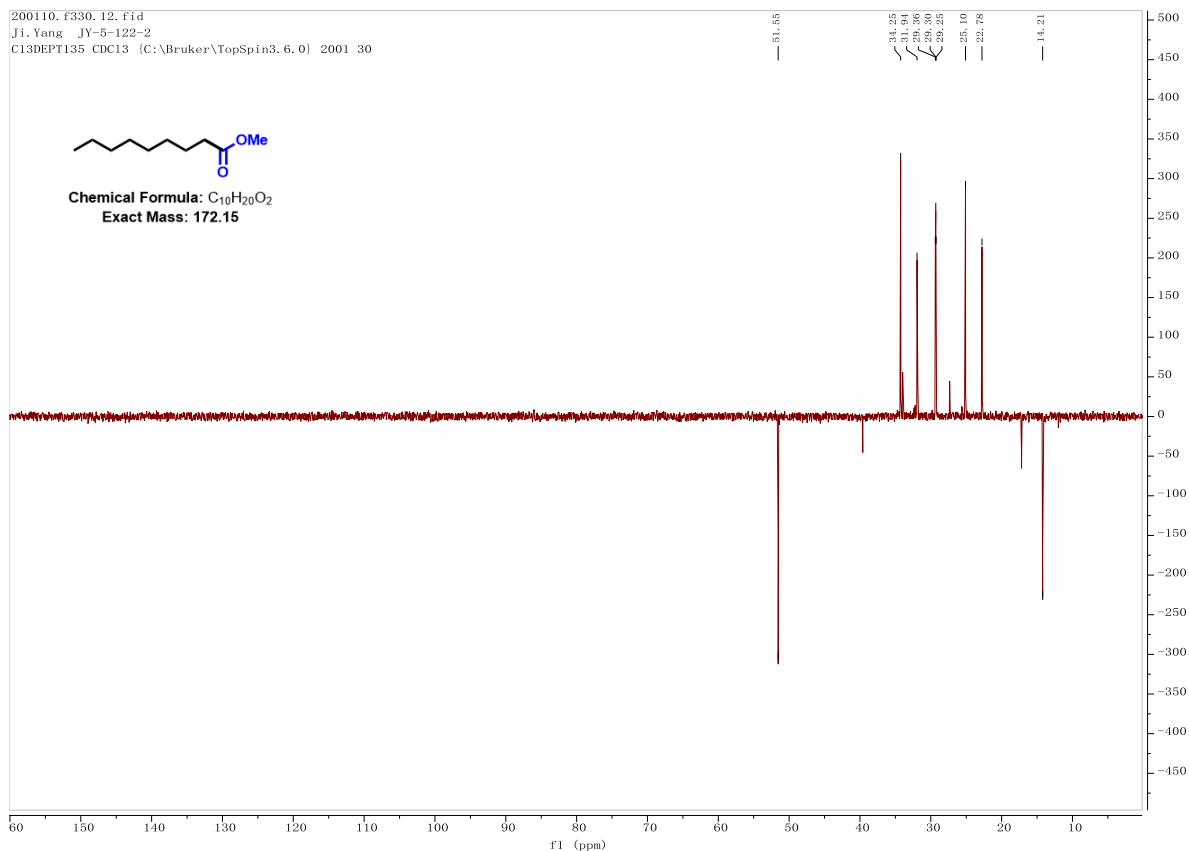

### Chromatogram and Results

| Injection Details    |                 |                         |
|----------------------|-----------------|-------------------------|
| Injection Name:      | JY-5-122-2      | Run Time (min): 40,00   |
| Vial Number:         | 62              | Injection Volume: 2,00  |
| Injection Type:      | Unknown         | Channel: FrontDetector  |
| Calibration Level:   |                 | Wavelength: n.a.        |
| Instrument Method:   | dong-40min      | Bandwidth: n.a.         |
| Processing Method:   | dong            | Dilution Factor: 1,0000 |
| Injection Date/Time: | 09.Jan.20 16:24 | Sample Weight: 1,0000   |

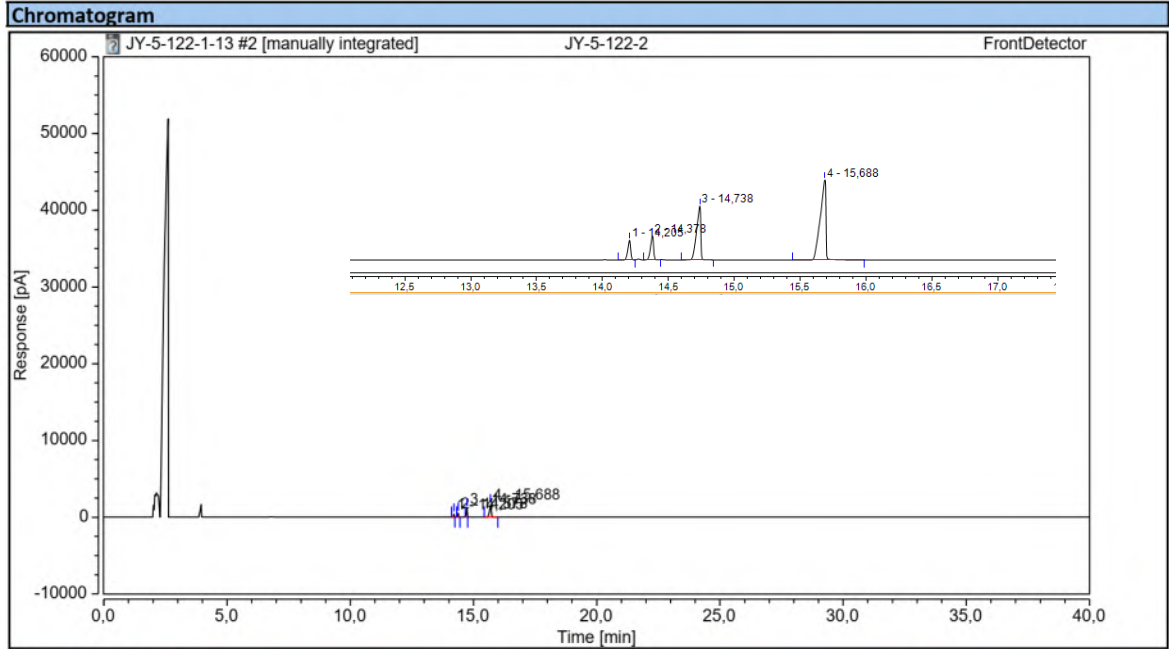

| Integration Results |             |                       |                |              |                    |                      |        |
|---------------------|-------------|-----------------------|----------------|--------------|--------------------|----------------------|--------|
| No.                 | Peak Name   | Retention Time<br>min | Area<br>pA*min | Height<br>pA | Relative Area<br>% | Relative Height<br>% | Amount |
| n.a.                | Component 2 | n.a.                  | n.a.           | n.a.         | n.a.               | n.a.                 | n.a.   |
| n.a.                | Component 3 | n.a.                  | n.a.           | n.a.         | n.a.               | n.a.                 | n.a.   |
| 1                   |             | 14,205                | 9,933          | 402,636      | 6,97               | 11,19                | n.a.   |
| 2                   |             | 14,378                | 12,442         | 486,257      | 8,73               | 13,51                | n.a.   |
| 3                   |             | 14,738                | 39,244         | 1087,904     | 27,54              | 30,22                | n.a.   |
| 4                   |             | 15,688                | 80,895         | 1622,894     | 56,76              | 45,08                | n.a.   |
| n.a.                | Component 4 | n.a.                  | n.a.           | n.a.         | n.a.               | n.a.                 | n.a.   |
| n.a.                | Component 5 | n.a.                  | n.a.           | n.a.         | n.a.               | n.a.                 | n.a.   |
| Total:              |             |                       | 142,514        | 3599,691     | 100,00             | 100,00               |        |

File :D:\MSDCHEM\1\DATA\2001\JY-5-122-2.D  
Operator :  
Acquired : 9 Jan 2020 15:47 using AcqMethod SK3-30X.M  
Instrument : GC-MSD  
Sample Name: JY-5-122-2  
Misc Info :  
Vial Number: 37

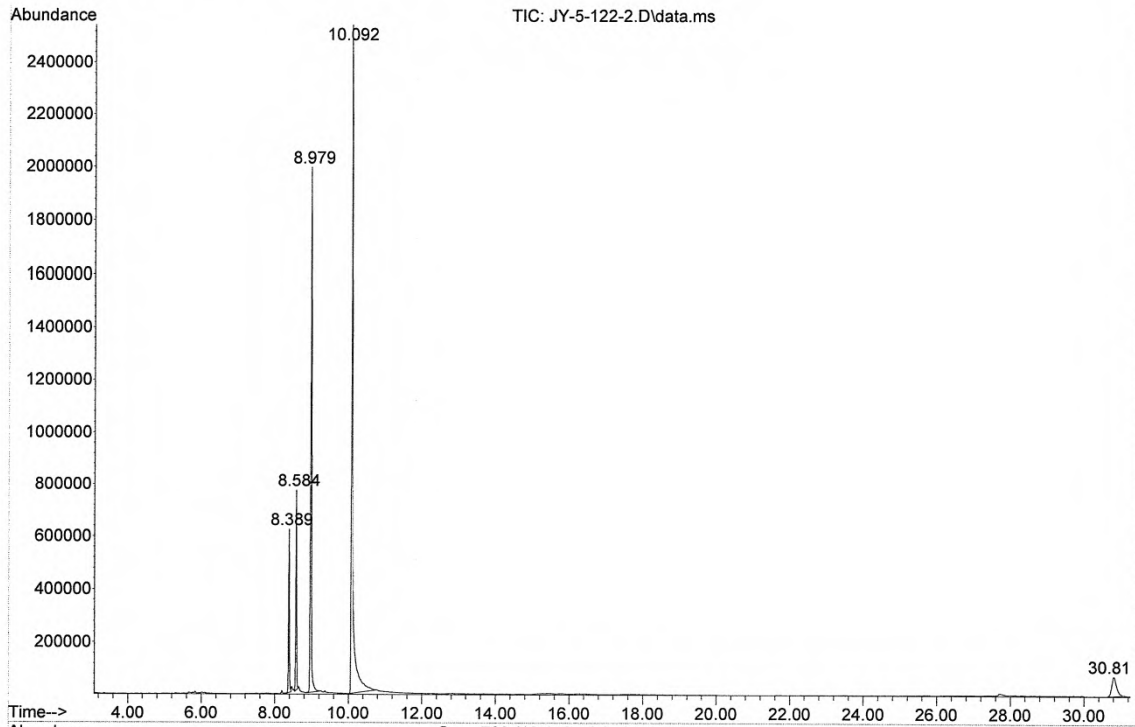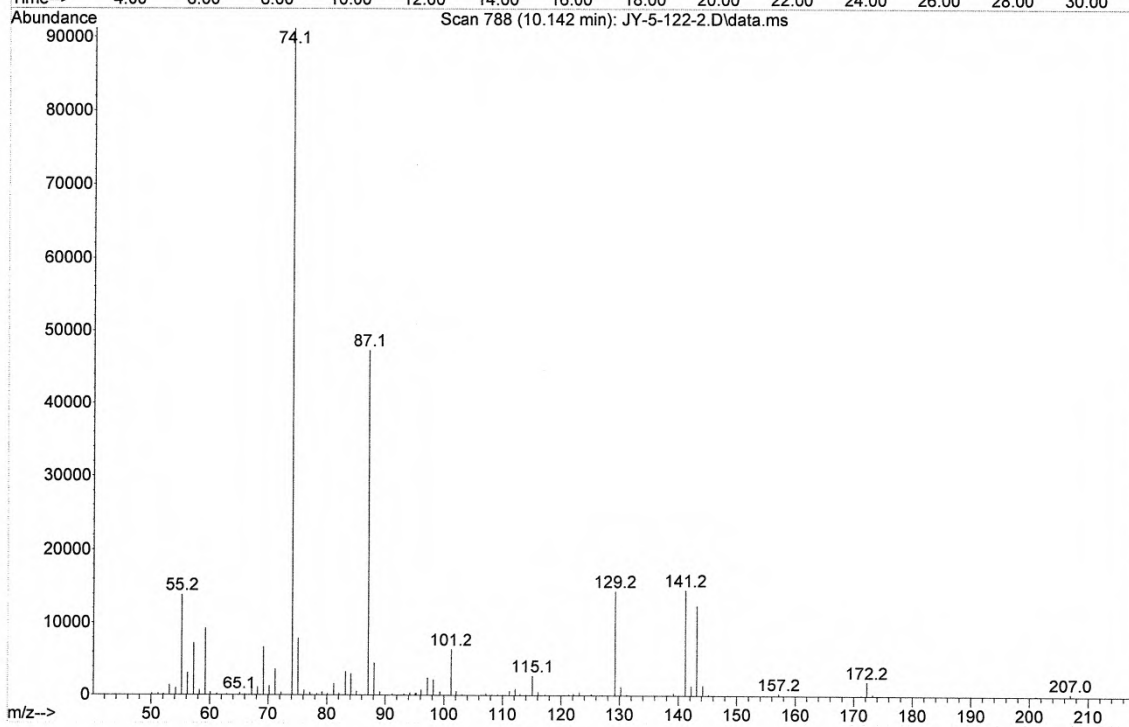

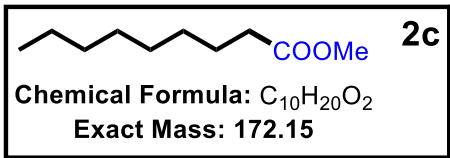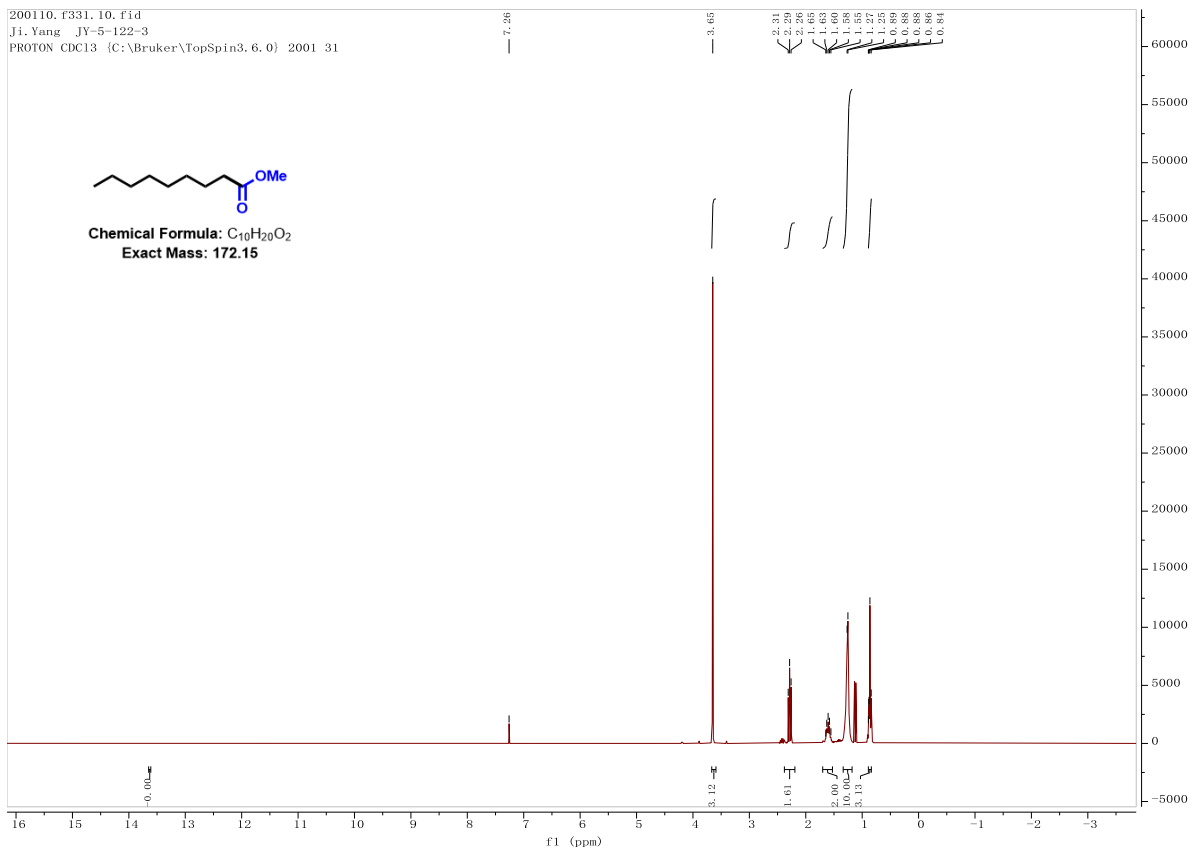

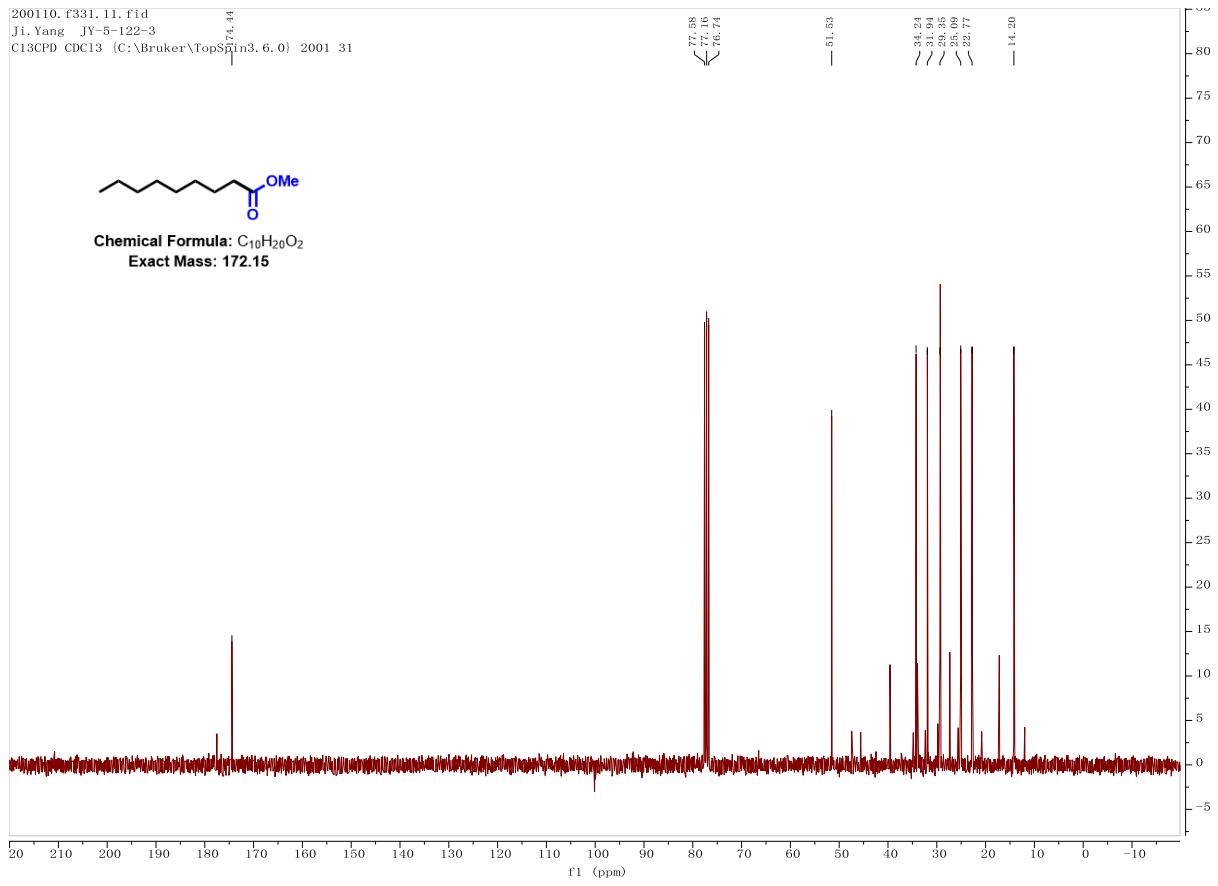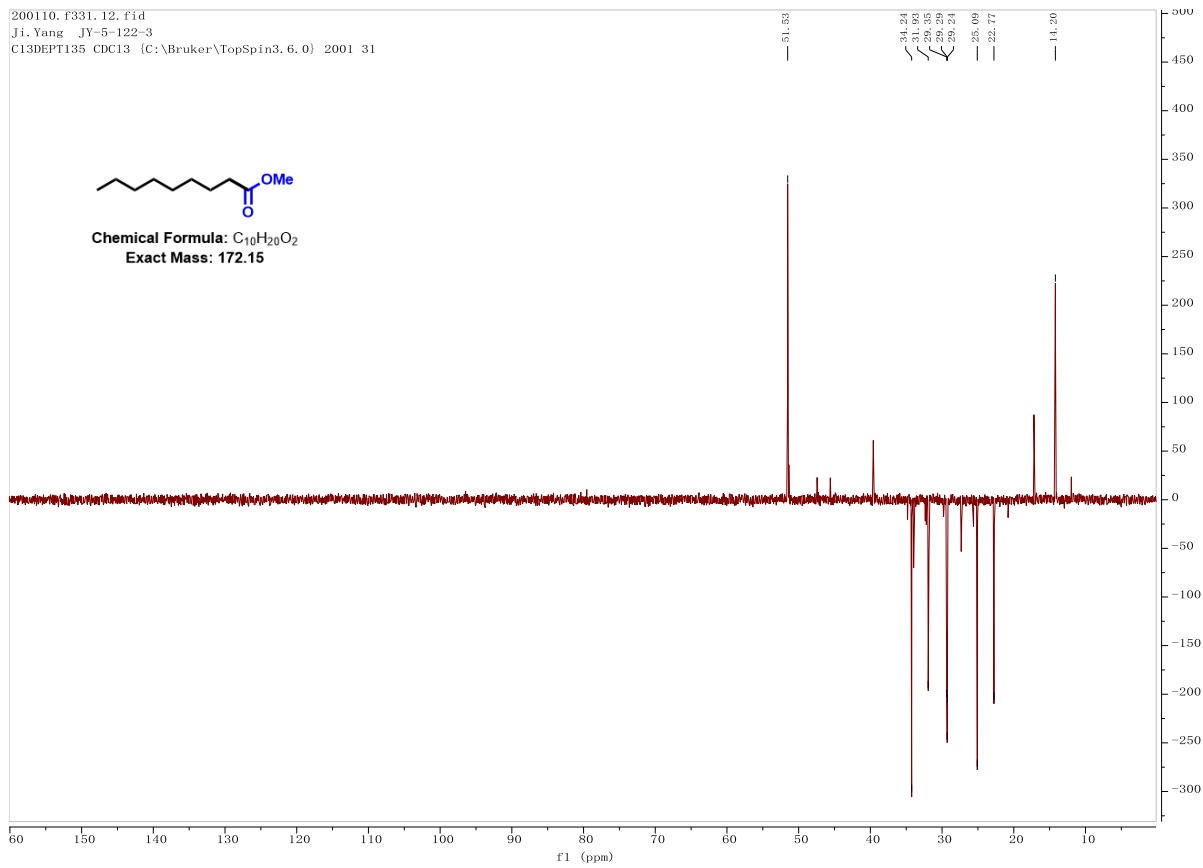



## Chromatogram and Results

| Injection Details    |                 |                         |
|----------------------|-----------------|-------------------------|
| Injection Name:      | JY-5-122-3      | Run Time (min): 40,00   |
| Vial Number:         | 63              | Injection Volume: 2,00  |
| Injection Type:      | Unknown         | Channel: FrontDetector  |
| Calibration Level:   |                 | Wavelength: n.a.        |
| Instrument Method:   | dong-40min      | Bandwidth: n.a.         |
| Processing Method:   | dong            | Dilution Factor: 1,0000 |
| Injection Date/Time: | 09.Jan.20 17:25 | Sample Weight: 1,0000   |

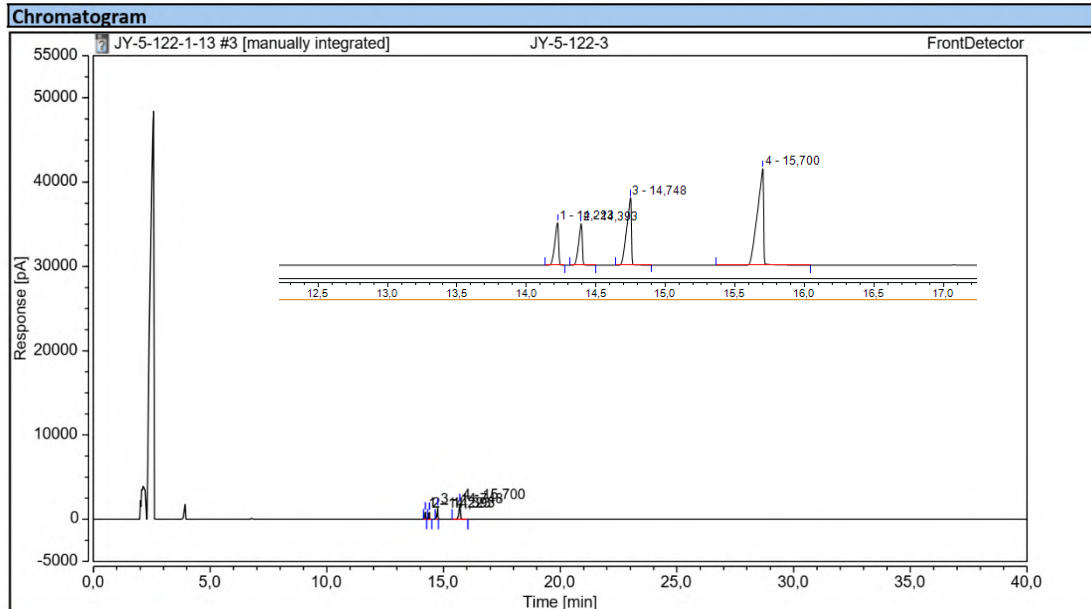

| Integration Results |             |                       |                |              |                    |                      |        |
|---------------------|-------------|-----------------------|----------------|--------------|--------------------|----------------------|--------|
| No.                 | Peak Name   | Retention Time<br>min | Area<br>pA*min | Height<br>pA | Relative Area<br>% | Relative Height<br>% | Amount |
| n.a.                | Component 2 | n.a.                  | n.a.           | n.a.         | n.a.               | n.a.                 | n.a.   |
| n.a.                | Component 3 | n.a.                  | n.a.           | n.a.         | n.a.               | n.a.                 | n.a.   |
| 1                   |             | 14,223                | 25,427         | 819,360      | 12,95              | 17,19                | n.a.   |
| 2                   |             | 14,393                | 24,045         | 797,381      | 12,25              | 16,73                | n.a.   |
| 3                   |             | 14,748                | 49,991         | 1293,989     | 25,47              | 27,15                | n.a.   |
| 4                   |             | 15,700                | 96,828         | 1856,073     | 49,33              | 38,94                | n.a.   |
| n.a.                | Component 4 | n.a.                  | n.a.           | n.a.         | n.a.               | n.a.                 | n.a.   |
| n.a.                | Component 5 | n.a.                  | n.a.           | n.a.         | n.a.               | n.a.                 | n.a.   |
| Total:              |             |                       | 196,291        | 4766,803     | 100,00             | 100,00               |        |

File :D:\MSDChem\1\DATA\2001\JY-5-122-3.D  
Operator :  
Acquired : 9 Jan 2020 16:26 using AcqMethod SK3-30X.M  
Instrument : GC-MSD  
Sample Name: JY-5-122-3  
Misc Info :  
Vial Number: 38

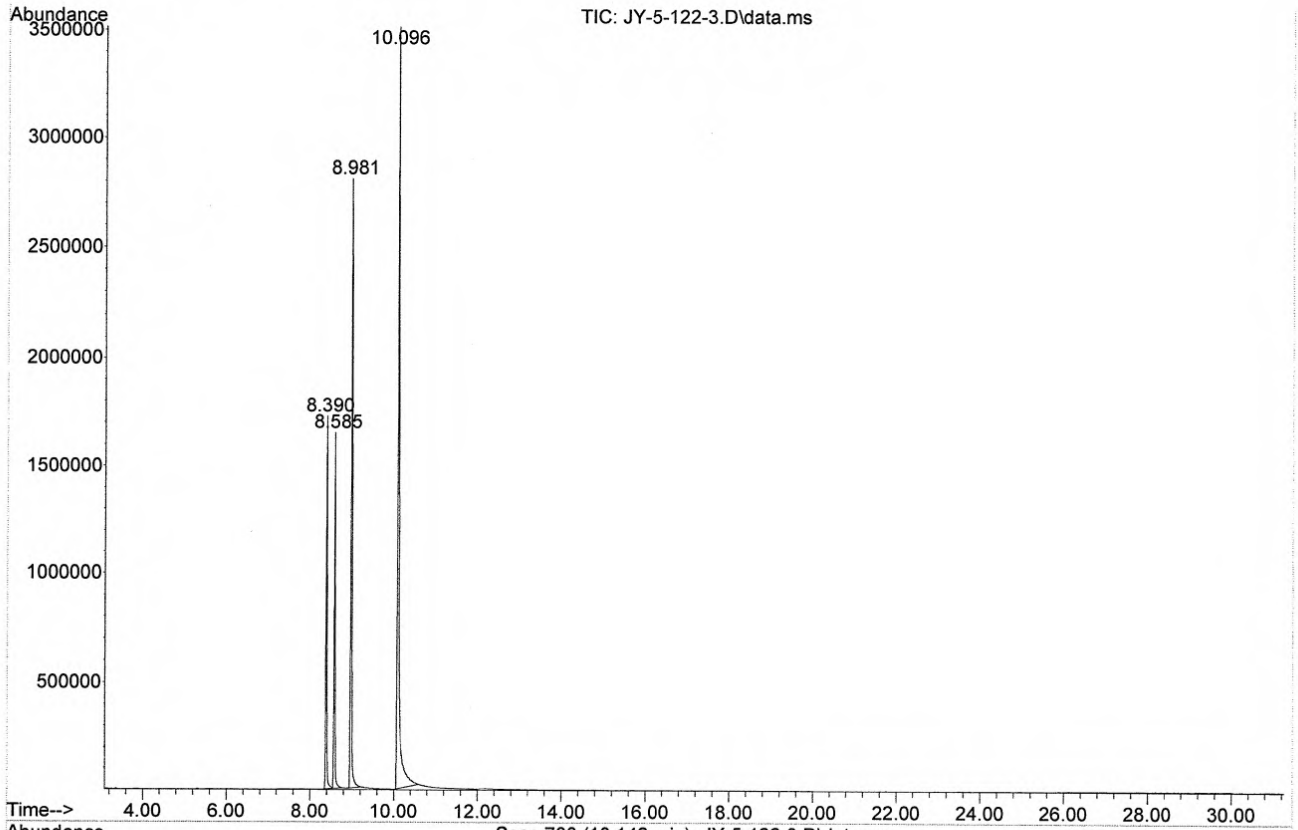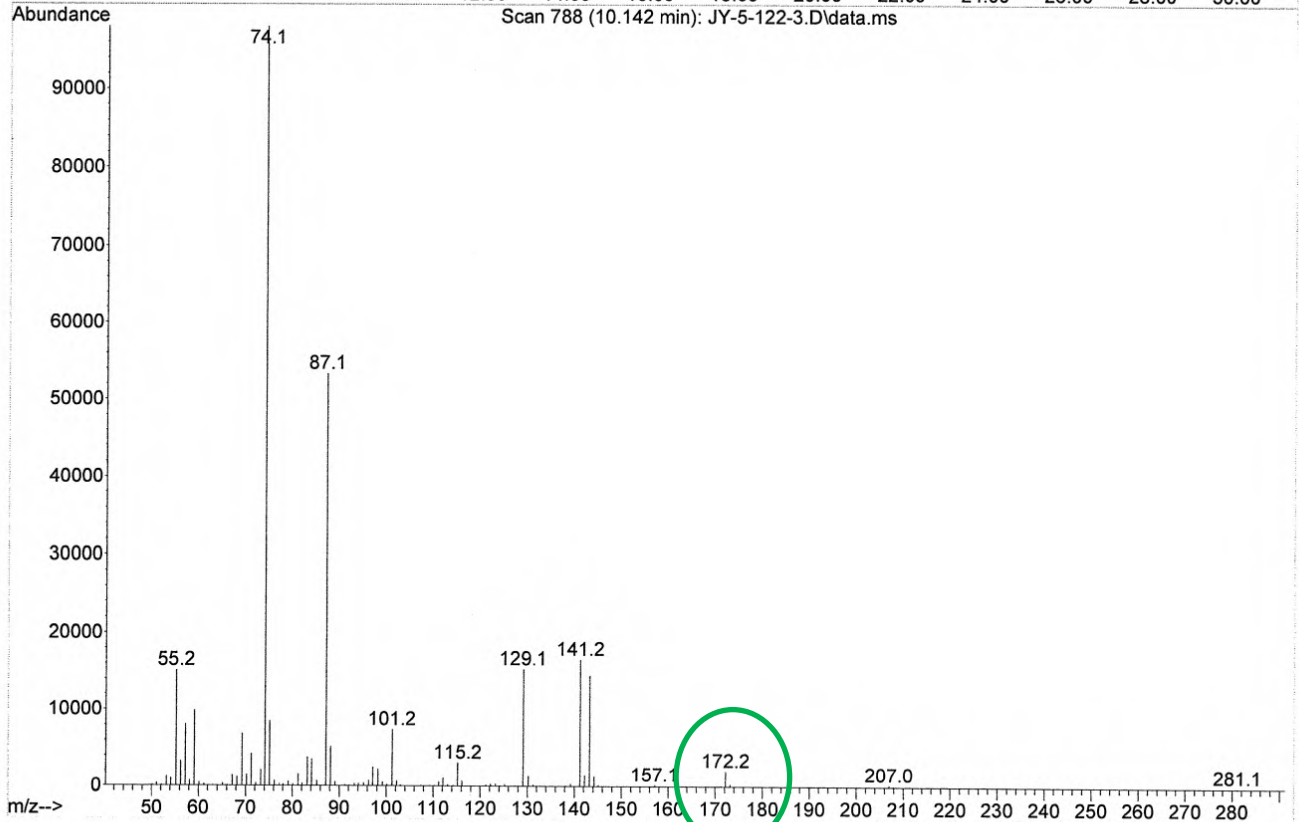

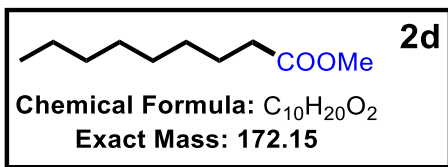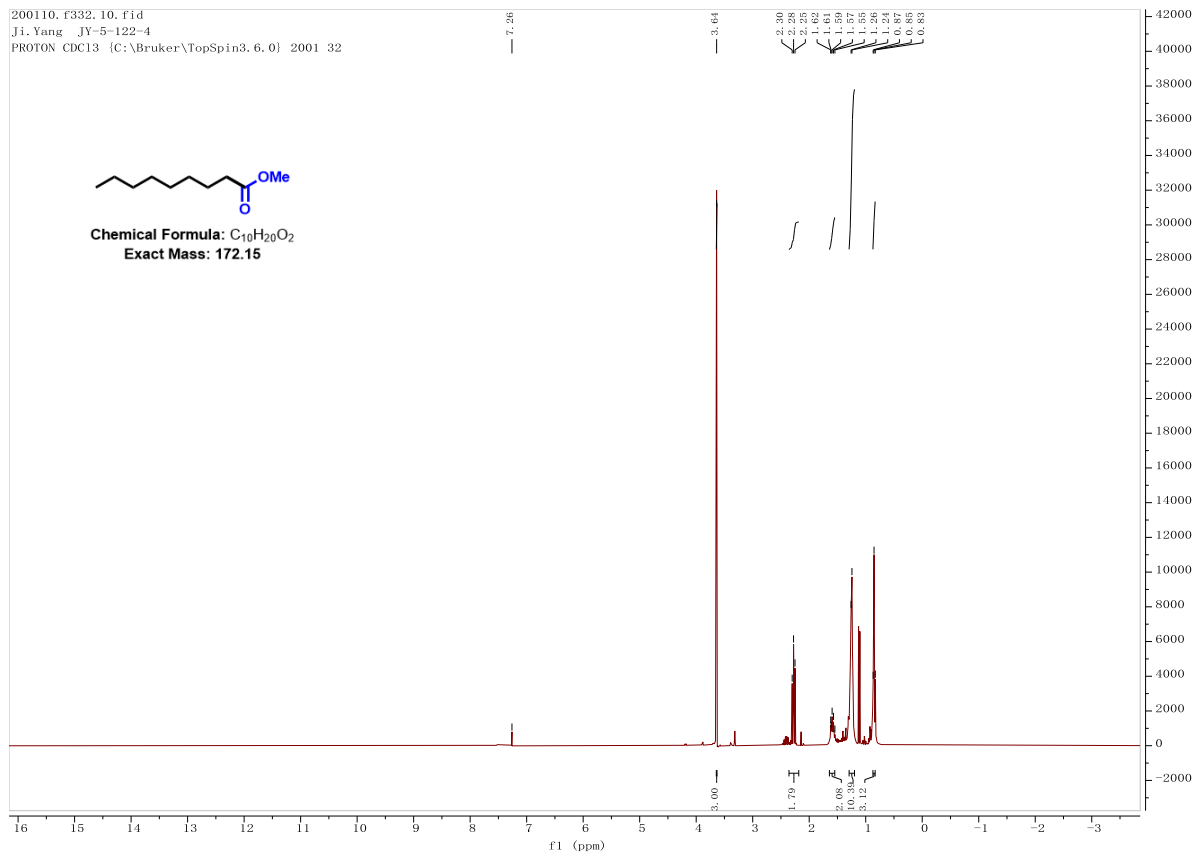

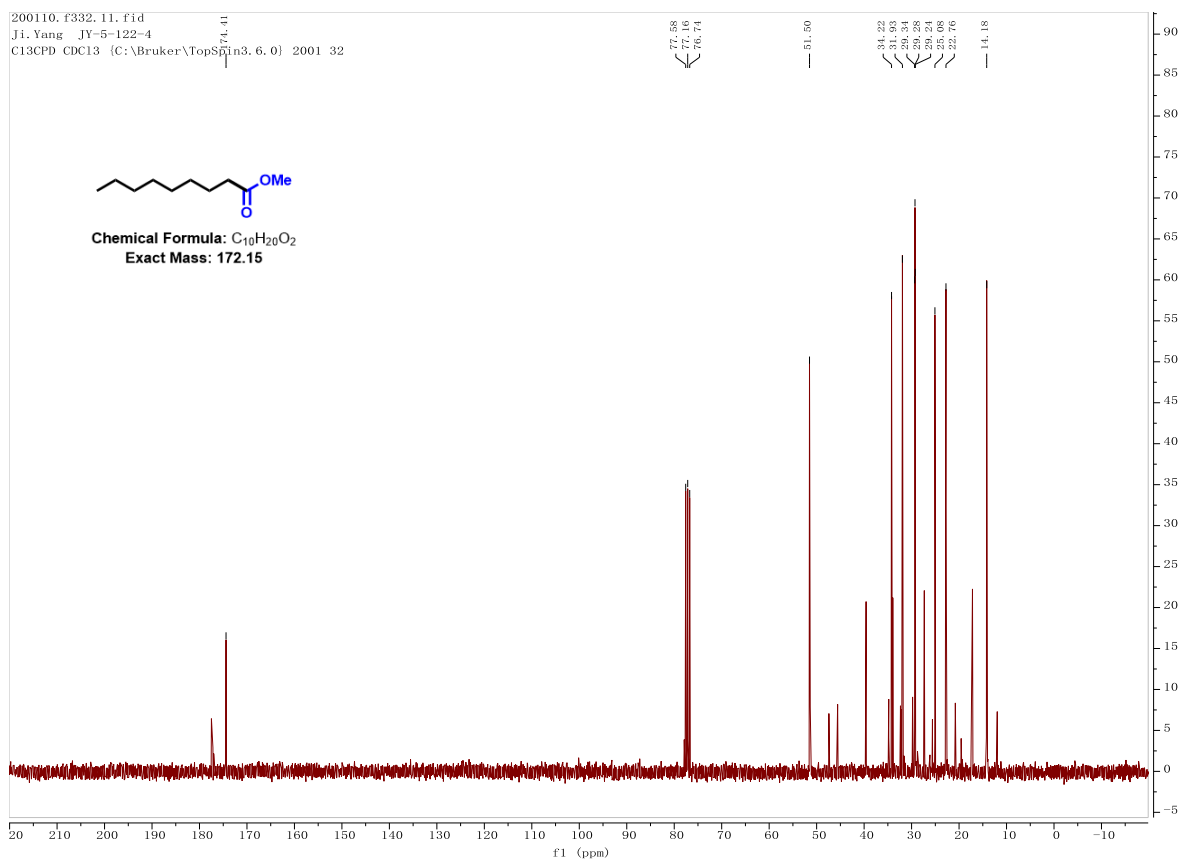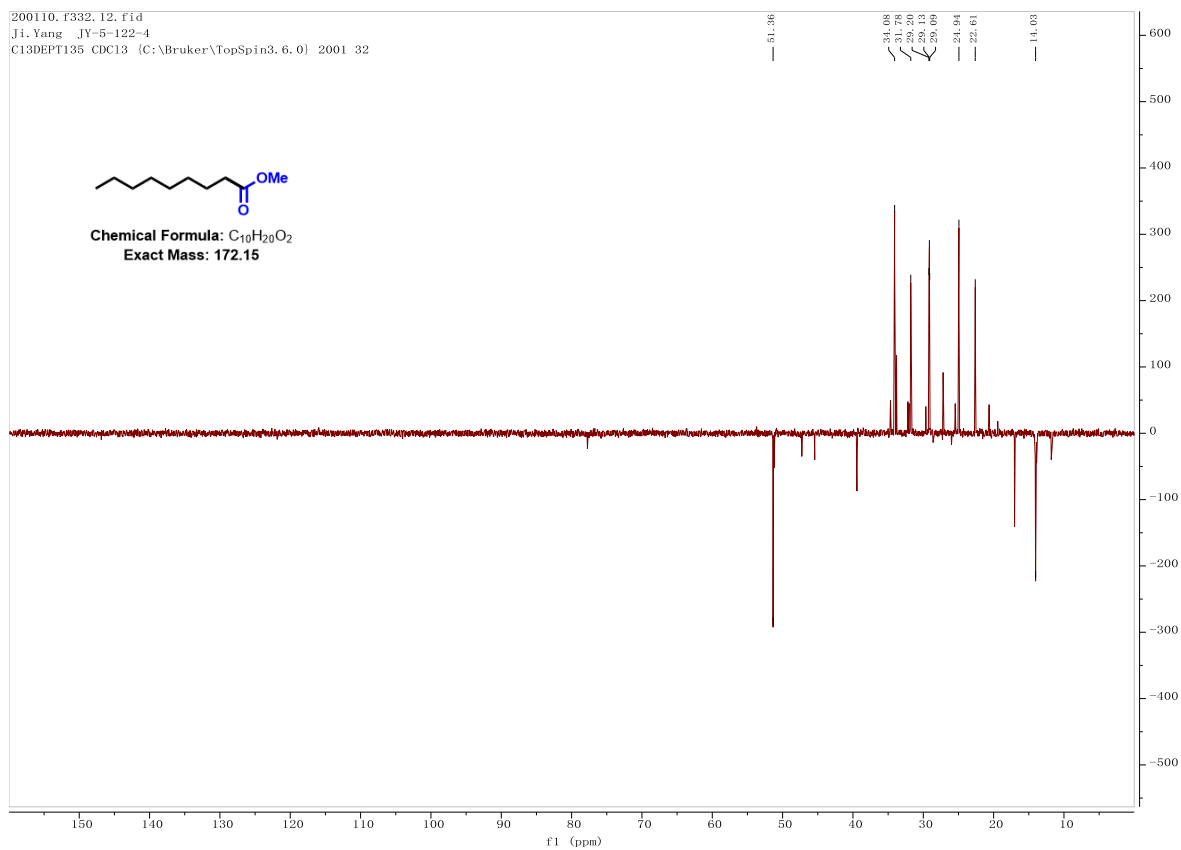

### Chromatogram and Results

| Injection Details    |                 |                         |
|----------------------|-----------------|-------------------------|
| Injection Name:      | JY-5-122-4      | Run Time (min): 40,00   |
| Vial Number:         | 64              | Injection Volume: 2,00  |
| Injection Type:      | Unknown         | Channel: FrontDetector  |
| Calibration Level:   |                 | Wavelength: n.a.        |
| Instrument Method:   | dong-40min      | Bandwidth: n.a.         |
| Processing Method:   | dong            | Dilution Factor: 1,0000 |
| Injection Date/Time: | 09.Jan.20 18:27 | Sample Weight: 1,0000   |

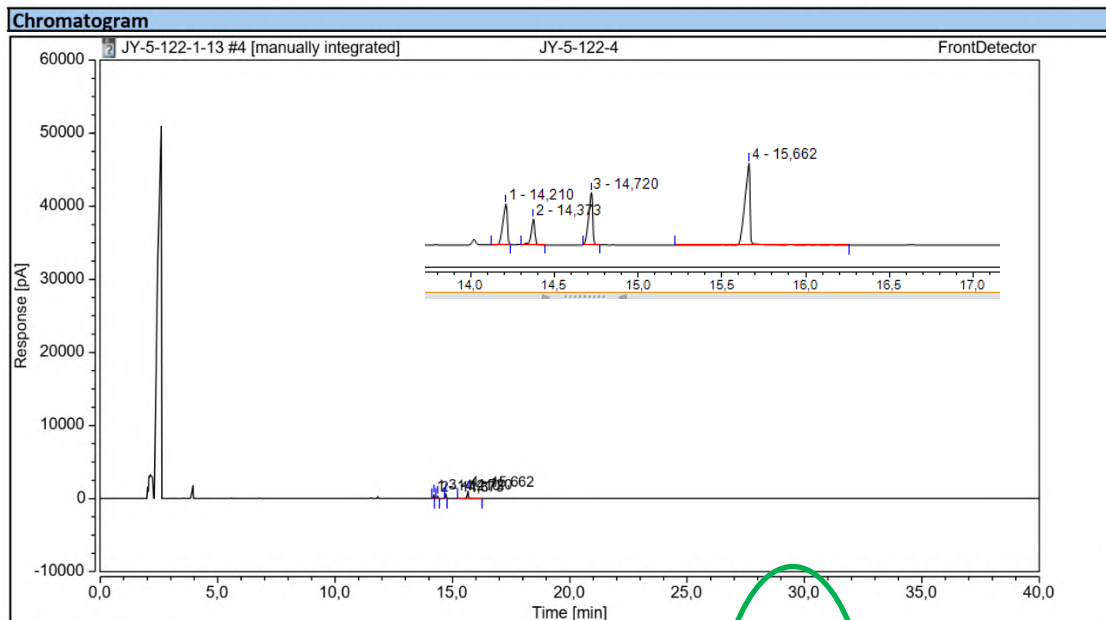

| Integration Results |             |                       |                |              |                    |                      |        |
|---------------------|-------------|-----------------------|----------------|--------------|--------------------|----------------------|--------|
| No.                 | Peak Name   | Retention Time<br>min | Area<br>pA*min | Height<br>pA | Relative Area<br>% | Relative Height<br>% | Amount |
| n.a.                | Component 2 | n.a.                  | n.a.           | n.a.         | n.a.               | n.a.                 | n.a.   |
| n.a.                | Component 3 | n.a.                  | n.a.           | n.a.         | n.a.               | n.a.                 | n.a.   |
| 1                   |             | 14,210                | 14,769         | 488,239      | 19,40              | 20,26                | n.a.   |
| 2                   |             | 14,373                | 7,810          | 309,592      | 10,26              | 12,85                | n.a.   |
| 3                   |             | 14,720                | 17,556         | 627,524      | 23,06              | 26,04                | n.a.   |
| 4                   |             | 15,662                | 35,984         | 984,437      | 47,27              | 40,85                | n.a.   |
| n.a.                | Component 4 | n.a.                  | n.a.           | n.a.         | n.a.               | n.a.                 | n.a.   |
| n.a.                | Component 5 | n.a.                  | n.a.           | n.a.         | n.a.               | n.a.                 | n.a.   |
| Total:              |             |                       | 76,119         | 2409,792     | 100,00             | 100,00               |        |

File :D:\MSDChem\1\DATA\2001\JY-5-122-4.D  
Operator :  
Acquired : 9 Jan 2020 17:05 using AcqMethod SK3-30X.M  
Instrument : GC-MSD  
Sample Name: JY-5-122-4  
Misc Info :  
Vial Number: 39

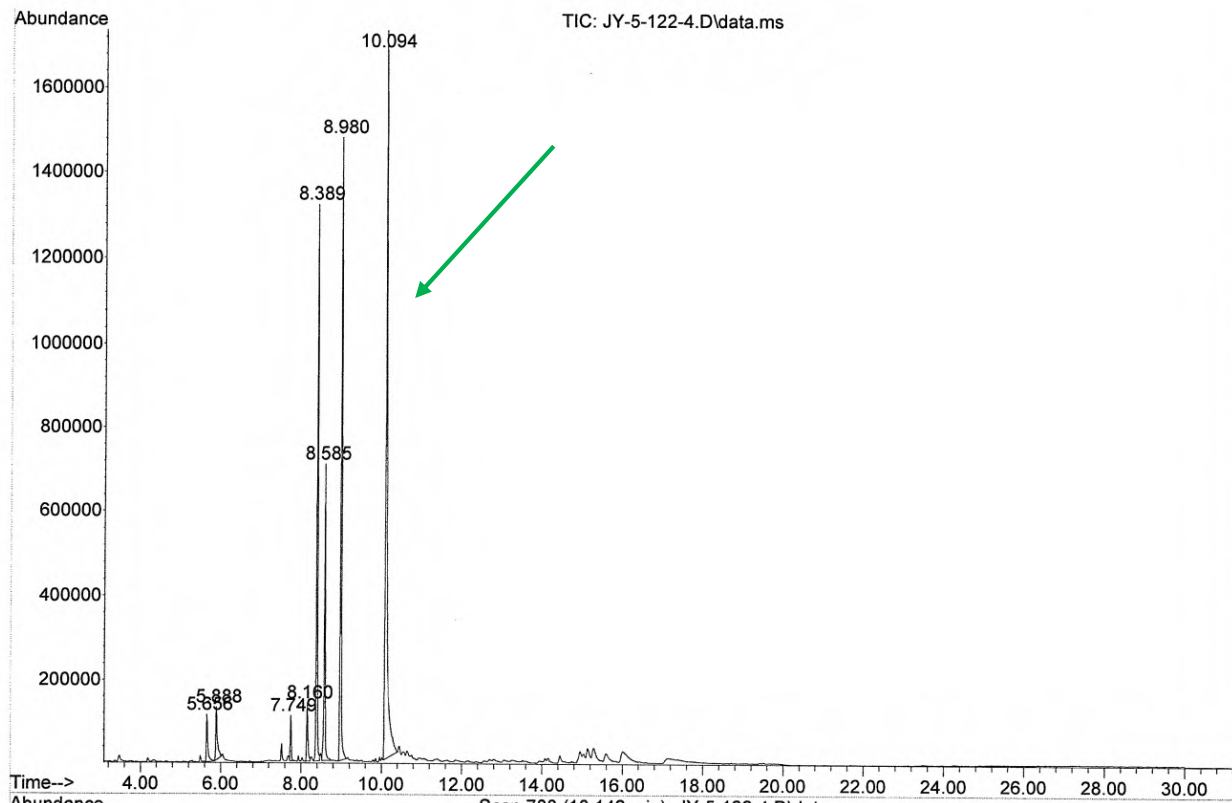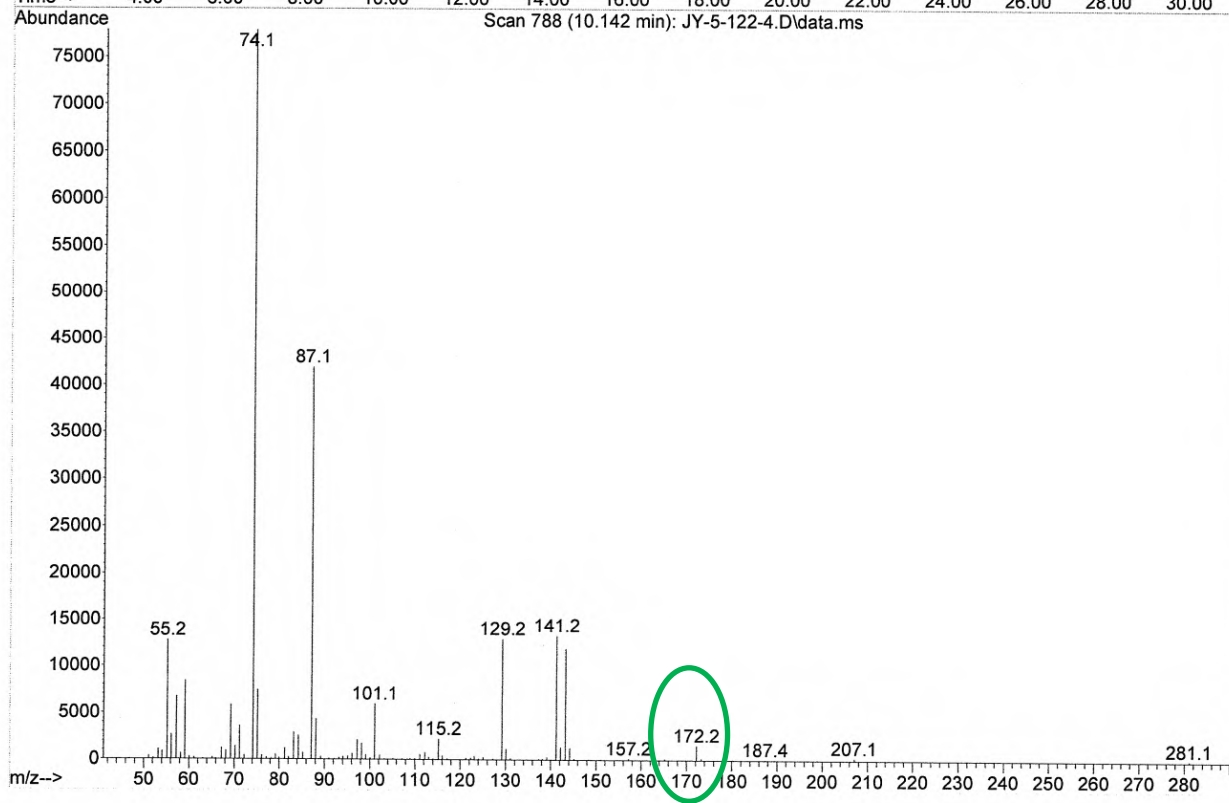

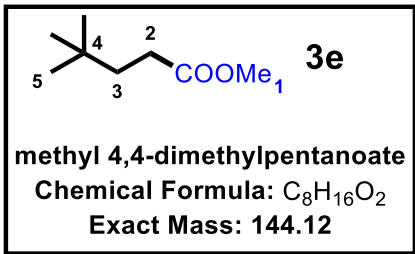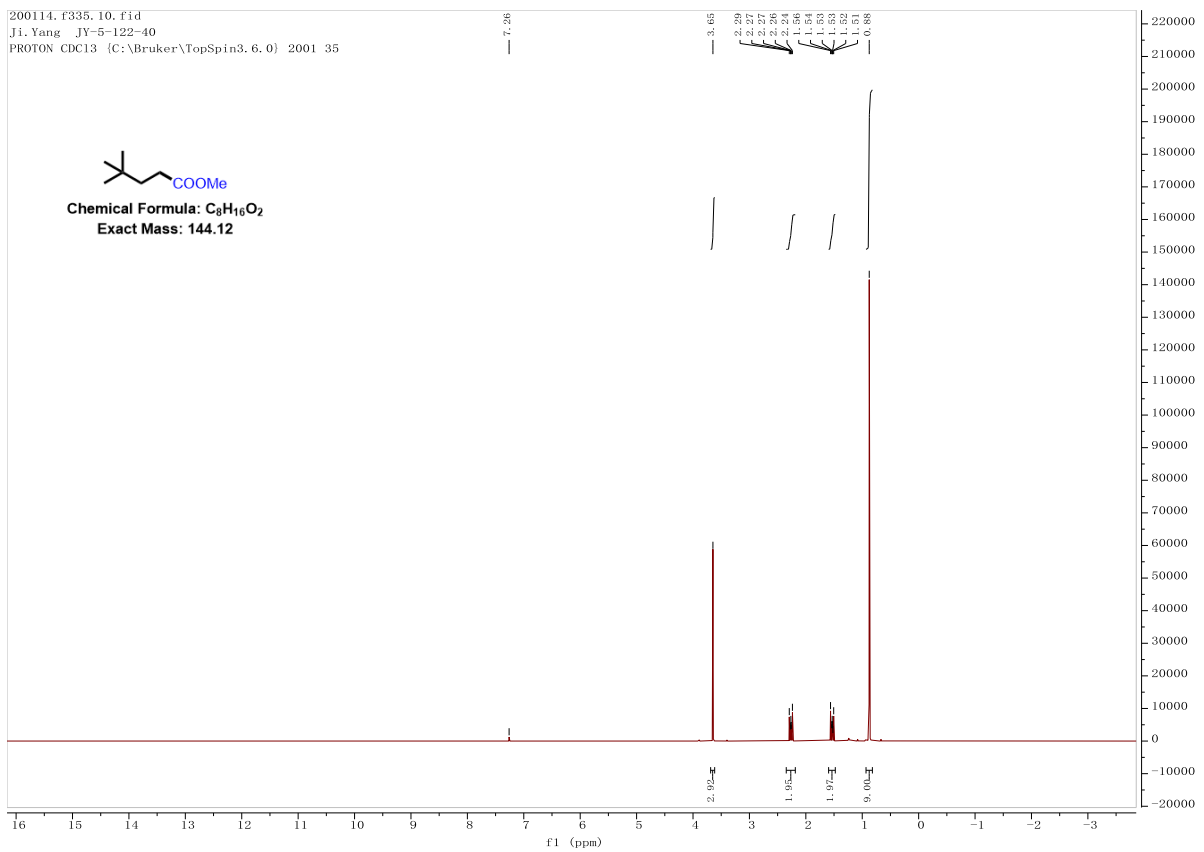

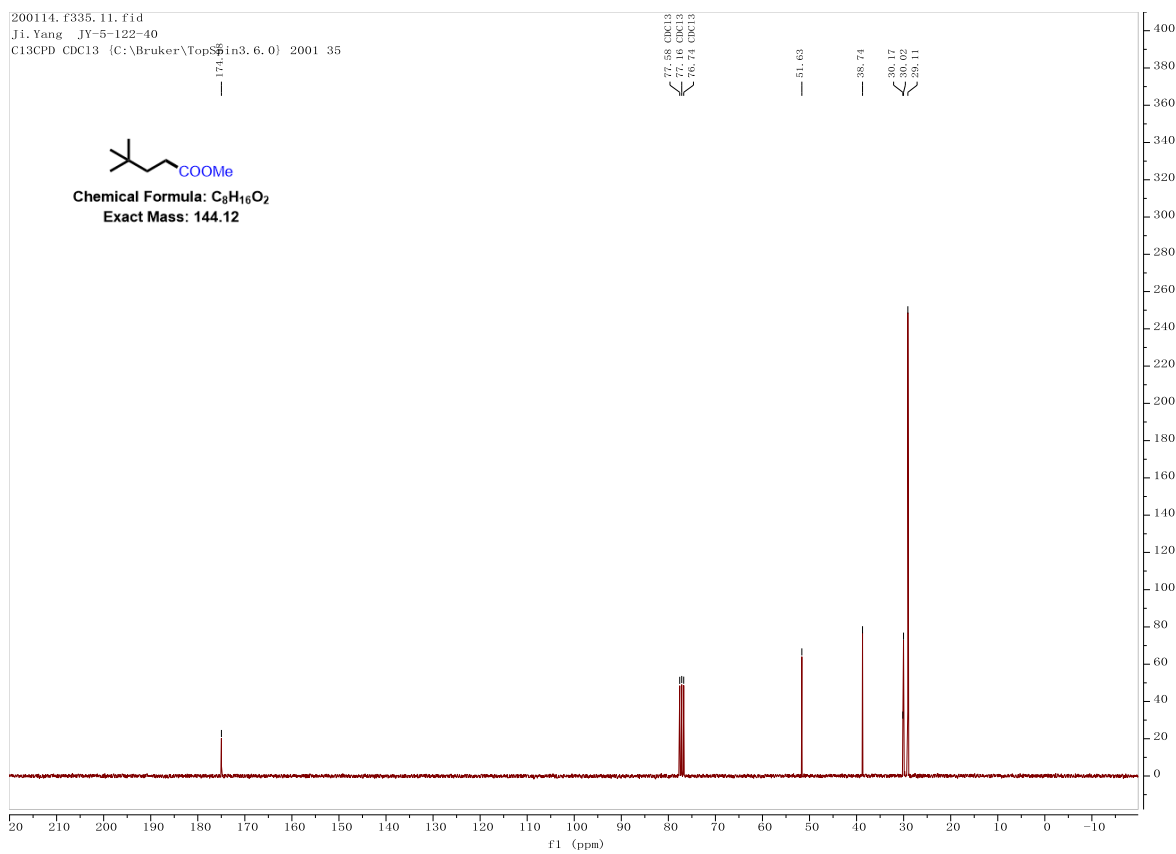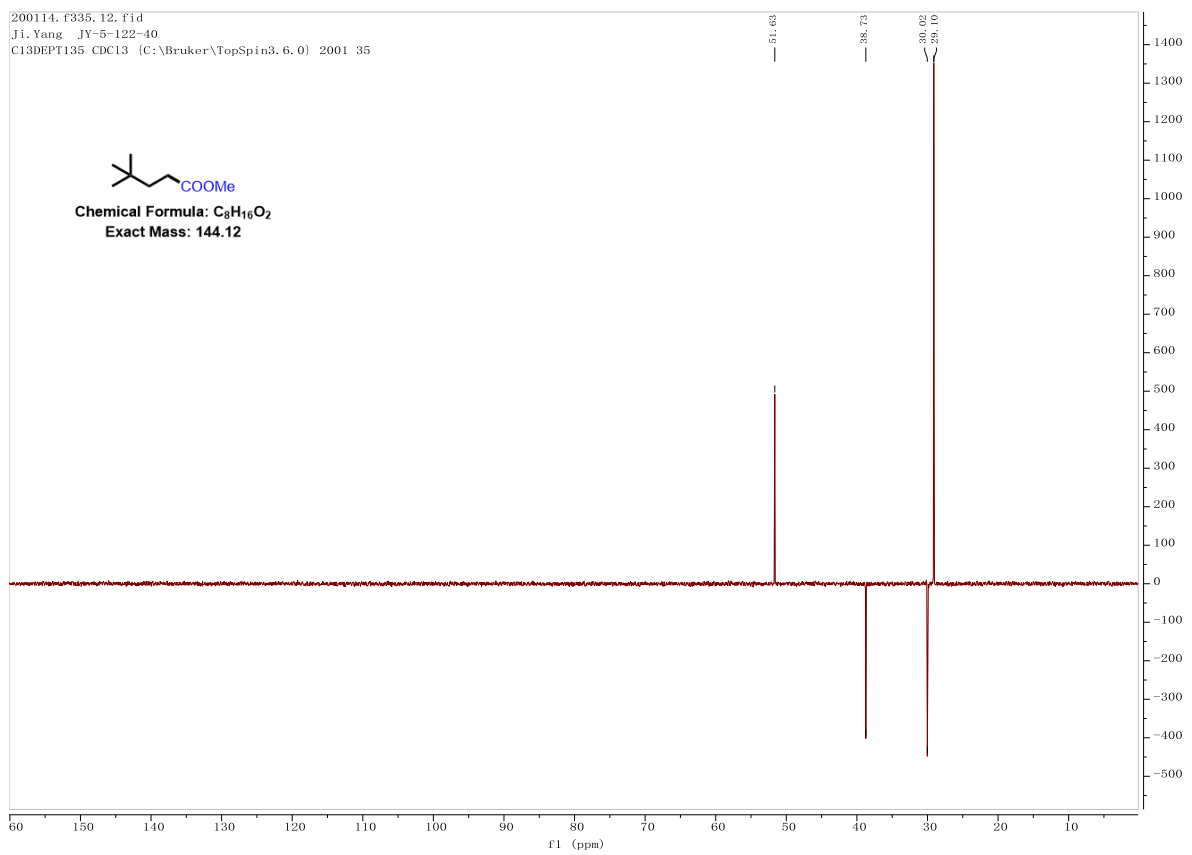



### Chromatogram and Results

| Injection Details    |                 |                   |               |
|----------------------|-----------------|-------------------|---------------|
| Injection Name:      | JY-5-122-5      | Run Time (min):   | 40,00         |
| Vial Number:         | 65              | Injection Volume: | 2,00          |
| Injection Type:      | Unknown         | Channel:          | FrontDetector |
| Calibration Level:   |                 | Wavelength:       | n.a.          |
| Instrument Method:   | dong-40min      | Bandwidth:        | n.a.          |
| Processing Method:   | dong            | Dilution Factor:  | 1,0000        |
| Injection Date/Time: | 09.Jan.20 19:29 | Sample Weight:    | 1,0000        |

#### Chromatogram

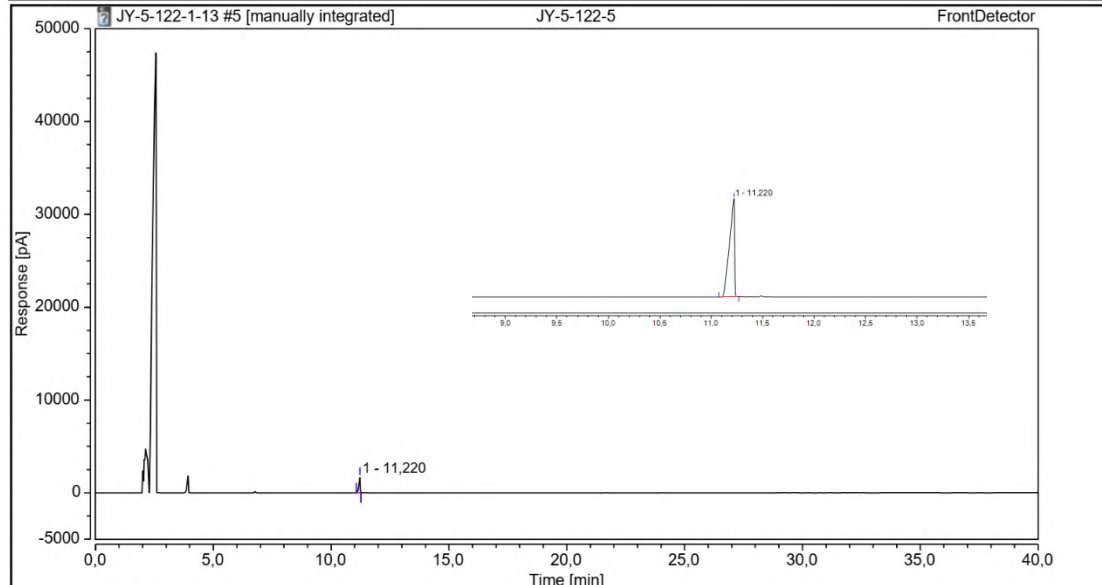

| Integration Results |             |                    |             |           |                 |                   |        |
|---------------------|-------------|--------------------|-------------|-----------|-----------------|-------------------|--------|
| No.                 | Peak Name   | Retention Time min | Area pA*min | Height pA | Relative Area % | Relative Height % | Amount |
| n.a.                | Component 2 | n.a.               | n.a.        | n.a.      | n.a.            | n.a.              | n.a.   |
| n.a.                | Component 3 | n.a.               | n.a.        | n.a.      | n.a.            | n.a.              | n.a.   |
| 1                   |             | 11,220             | 92,026      | 1617,879  | 100,00          | 100,00            | n.a.   |
| n.a.                | Component 4 | n.a.               | n.a.        | n.a.      | n.a.            | n.a.              | n.a.   |
| n.a.                | Component 5 | n.a.               | n.a.        | n.a.      | n.a.            | n.a.              | n.a.   |
| Total:              |             |                    | 92,026      | 1617,879  | 100,00          | 100,00            |        |

File :D:\MSDChem\1\DATA\2001\JY-5-122-5.D  
Operator :  
Acquired : 9 Jan 2020 17:44 using AcqMethod SK3-30X.M  
Instrument : GC-MSD  
Sample Name: JY-5-122-5  
Misc Info :  
Vial Number: 40

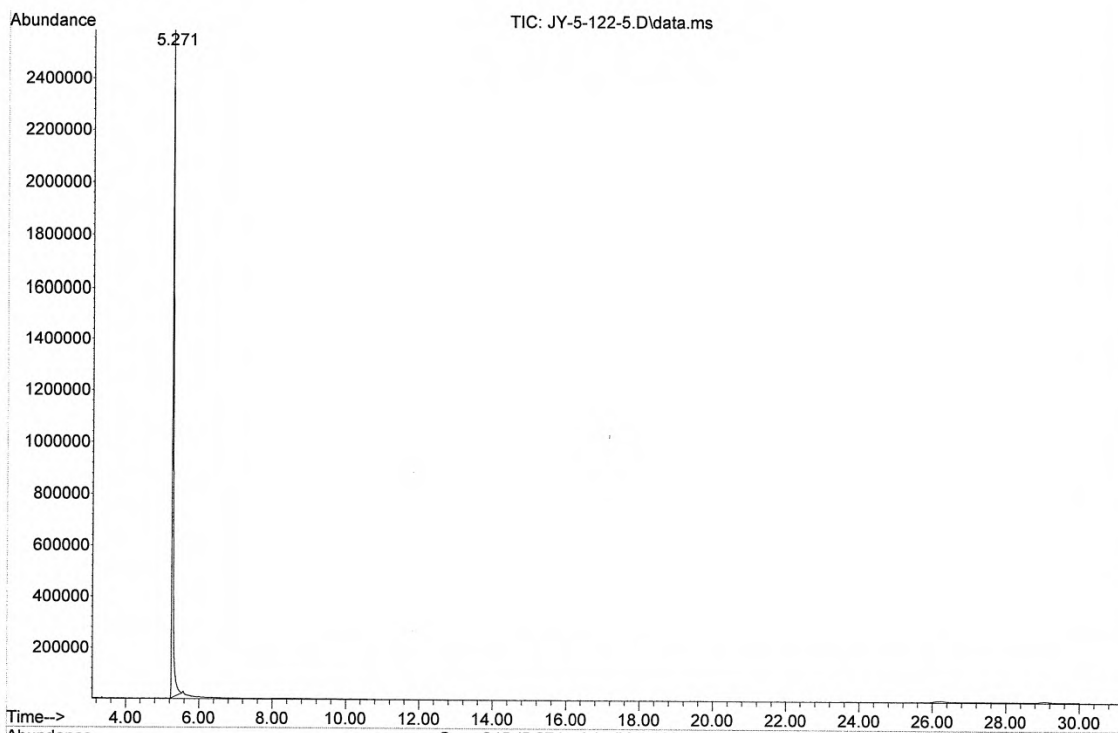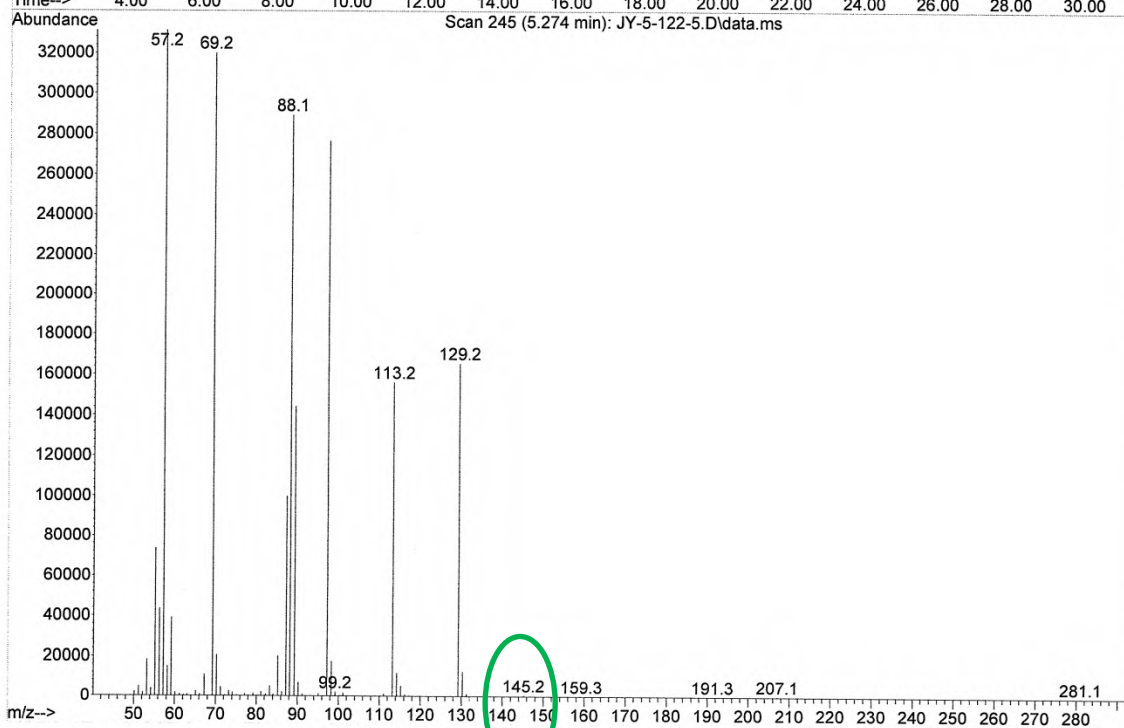

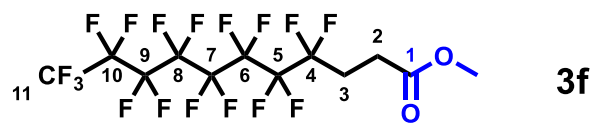

**methyl 4,4,5,5,6,6,7,7,8,8,9,9,10,10,11,11,11-heptafluoroundecanoate**  
**Chemical Formula: C<sub>12</sub>H<sub>7</sub>F<sub>17</sub>O<sub>2</sub>**  
**Exact Mass: 506.02**

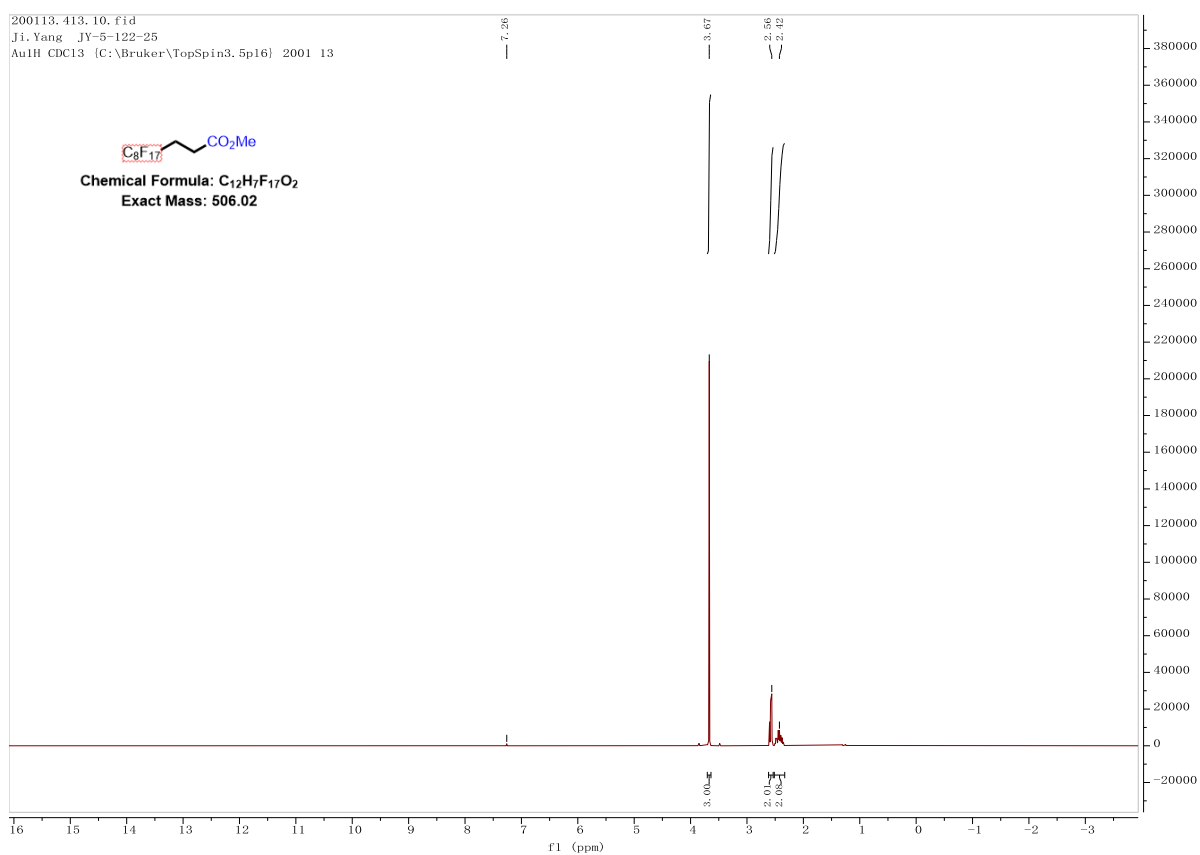

200113.413.11.fid  
Ji, Yang JY-5-122-25  
Au13C CDC13 [C:\Bruker\TopSpin3.5p16] 2001 13

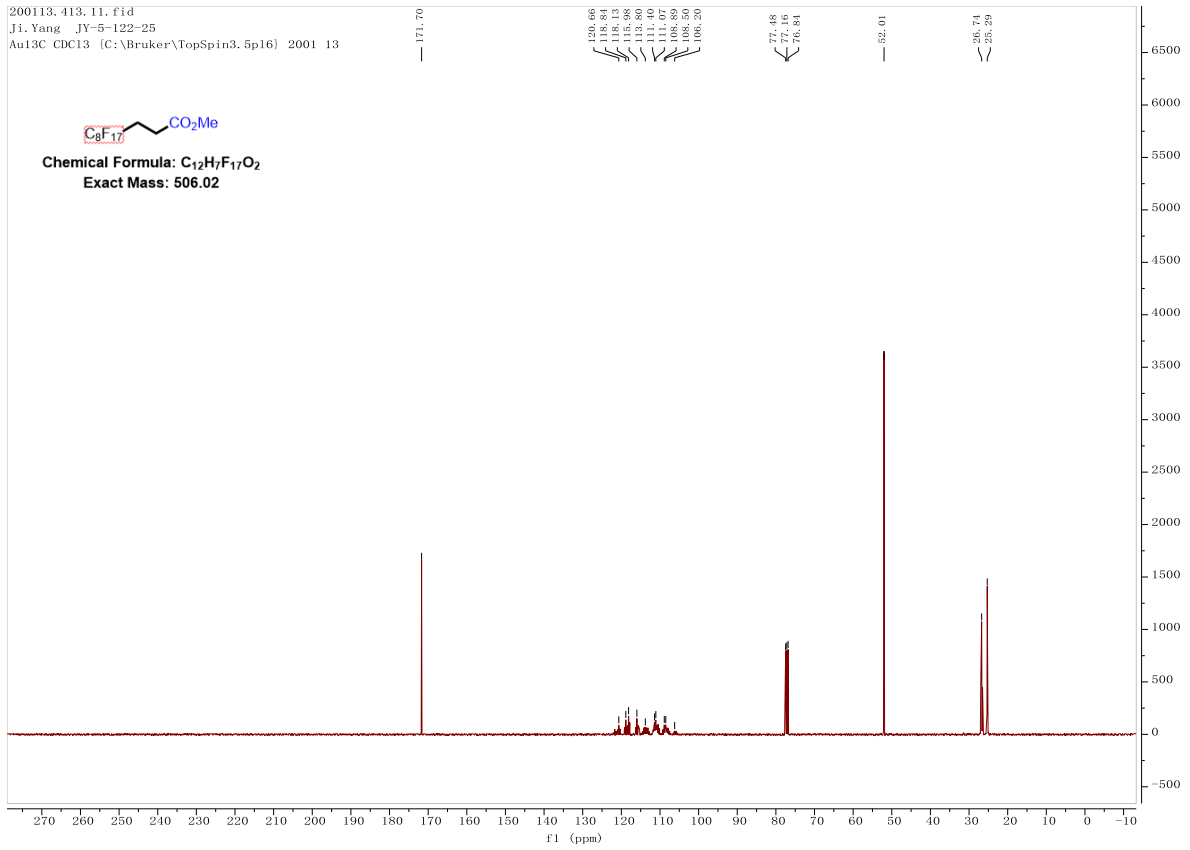

200113.413.12.fid  
Ji, Yang JY-5-122-25  
Au13C-dept CDC13 [C:\Bruker\TopSpin3.5p16] 2001 13

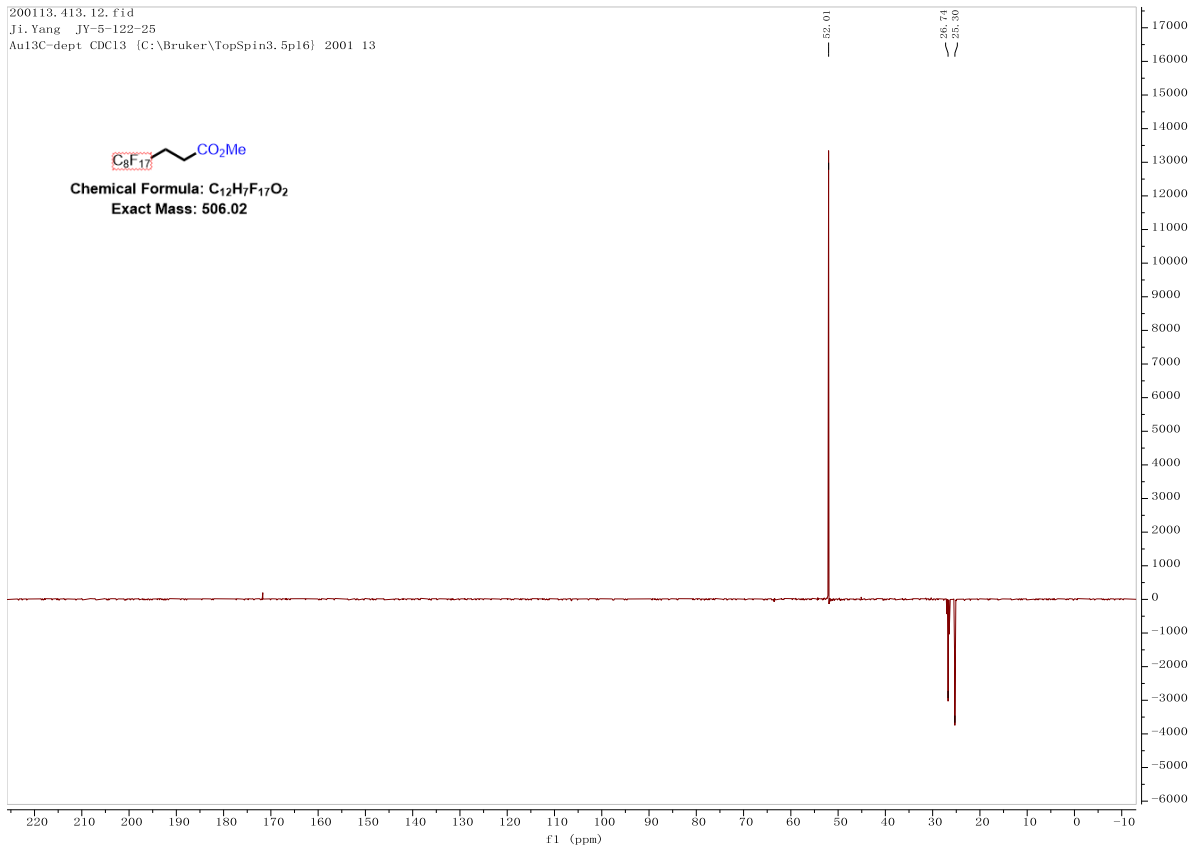

## Chromatogram and Results

### Injection Details

|                      |                   |                   |               |
|----------------------|-------------------|-------------------|---------------|
| Injection Name:      | JY-5-122-14-26-12 | Run Time (min):   | 40,00         |
| Vial Number:         | 122               | Injection Volume: | 2,00          |
| Injection Type:      | Unknown           | Channel:          | FrontDetector |
| Calibration Level:   |                   | Wavelength:       | n.a.          |
| Instrument Method:   | dong-40min        | Bandwidth:        | n.a.          |
| Processing Method:   | dong              | Dilution Factor:  | 1,0000        |
| Injection Date/Time: | 10.Jan.20 18:06   | Sample Weight:    | 1,0000        |

### Chromatogram

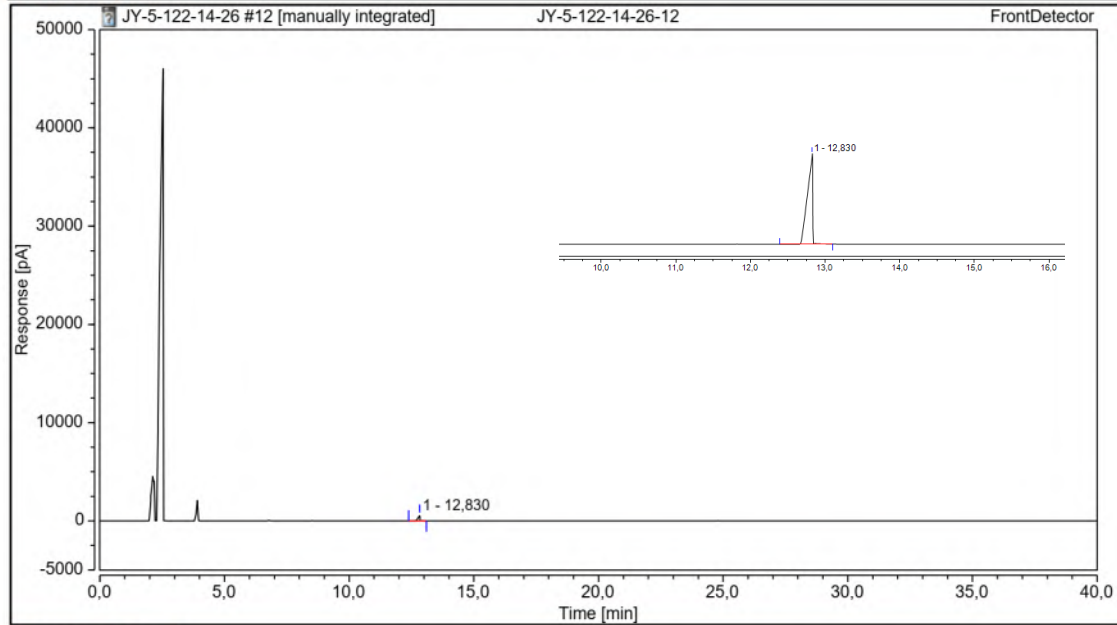

### Integration Results

| No.           | Peak Name   | Retention Time<br>min | Area<br>pA*min | Height<br>pA   | Relative Area<br>% | Relative Height<br>% | Amount |
|---------------|-------------|-----------------------|----------------|----------------|--------------------|----------------------|--------|
| n.a.          | Component 2 | n.a.                  | n.a.           | n.a.           | n.a.               | n.a.                 | n.a.   |
| n.a.          | Component 3 | n.a.                  | n.a.           | n.a.           | n.a.               | n.a.                 | n.a.   |
| 1             |             | 12,830                | 45,757         | 565,361        | 100,00             | 100,00               | n.a.   |
| n.a.          | Component 4 | n.a.                  | n.a.           | n.a.           | n.a.               | n.a.                 | n.a.   |
| n.a.          | Component 5 | n.a.                  | n.a.           | n.a.           | n.a.               | n.a.                 | n.a.   |
| <b>Total:</b> |             |                       | <b>45,757</b>  | <b>565,361</b> | <b>100,00</b>      | <b>100,00</b>        |        |

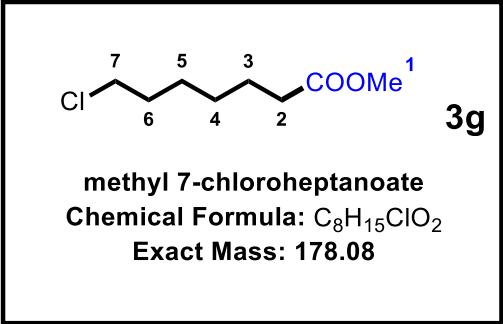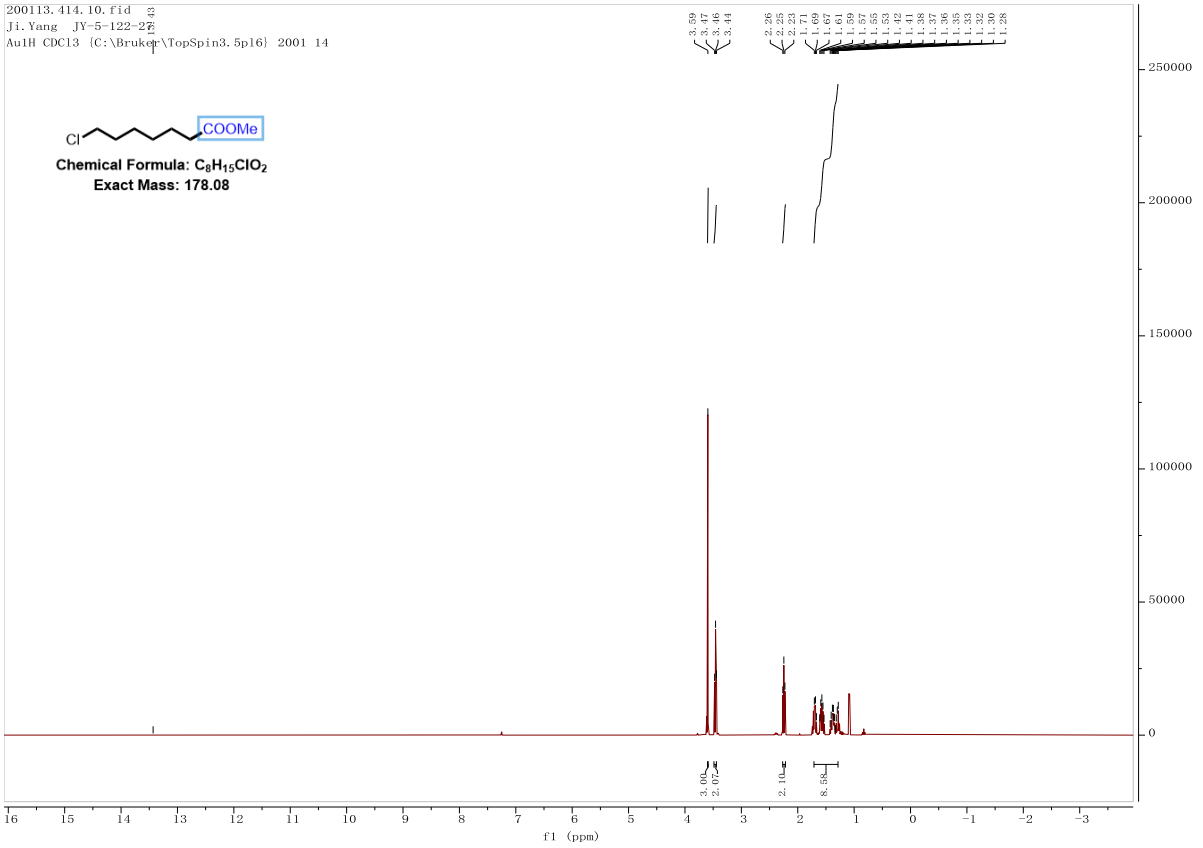

200113.414.11.fid  
Ji. Yang JY-5-122-27  
Au13C CDC13 [C:\Bruker\TopSpin3.5p16] 2001 14

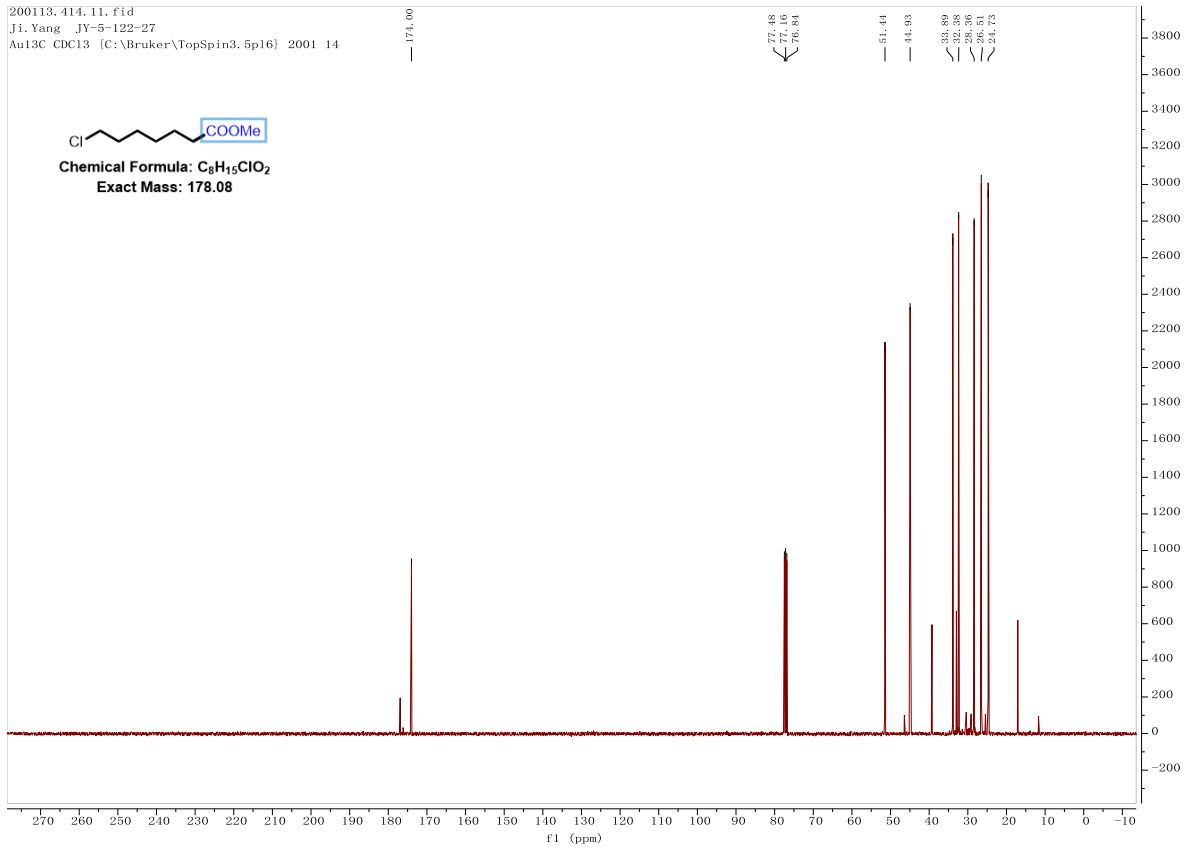

200113.414.12.fid  
Ji. Yang JY-5-122-27  
Au13C-dept CDC13 [C:\Bruker\TopSpin3.5p16] 2001 14

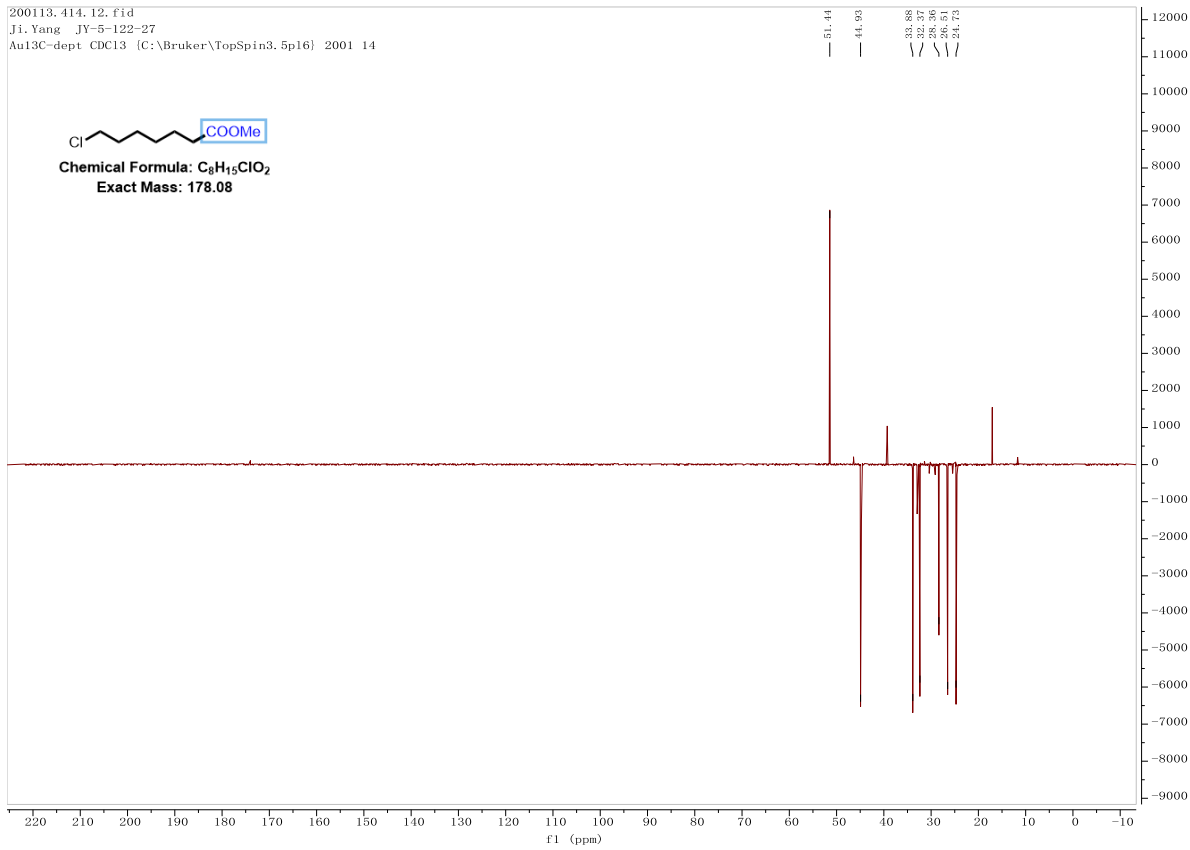

### Chromatogram and Results

| Injection Details    |                  |                   |               |
|----------------------|------------------|-------------------|---------------|
| Injection Name:      | JY-5-122-27-39-1 | Run Time (min):   | 40,00         |
| Vial Number:         | 25               | Injection Volume: | 2,00          |
| Injection Type:      | Unknown          | Channel:          | FrontDetector |
| Calibration Level:   |                  | Wavelength:       | n.a.          |
| Instrument Method:   | dong-40min       | Bandwidth:        | n.a.          |
| Processing Method:   | dong             | Dilution Factor:  | 1,0000        |
| Injection Date/Time: | 10.Jan.20 21:31  | Sample Weight:    | 1,0000        |

#### Chromatogram

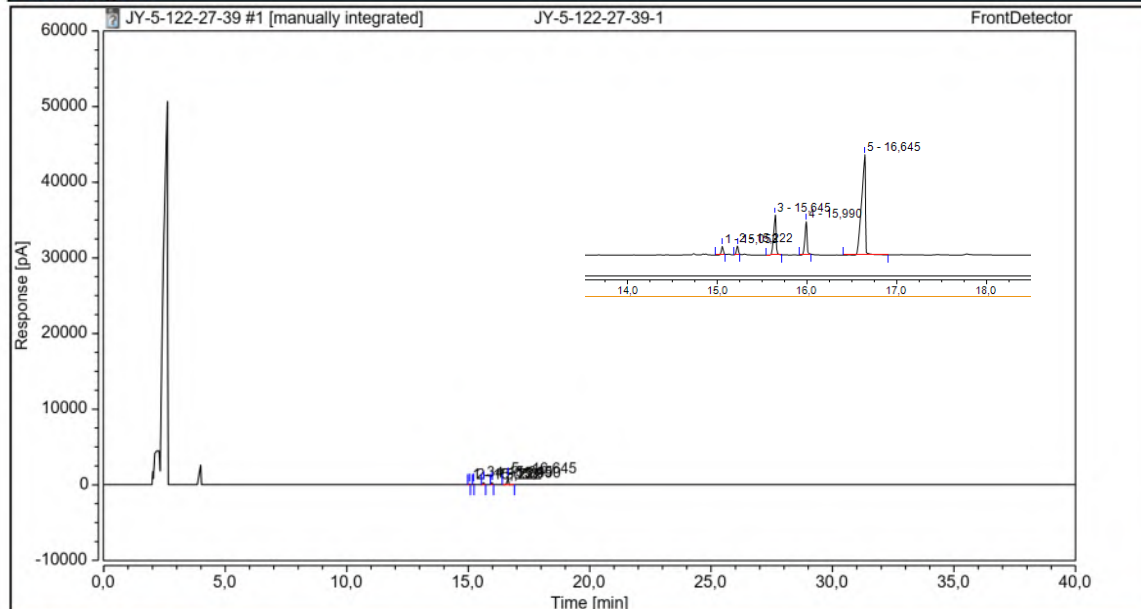

#### Integration Results

| No.    | Peak Name   | Retention Time<br>min | Area<br>pA*min | Height<br>pA | Relative Area<br>% | Relative Height<br>% | Amount |
|--------|-------------|-----------------------|----------------|--------------|--------------------|----------------------|--------|
| n.a.   | Component 2 | n.a.                  | n.a.           | n.a.         | n.a.               | n.a.                 | n.a.   |
| n.a.   | Component 3 | n.a.                  | n.a.           | n.a.         | n.a.               | n.a.                 | n.a.   |
| 1      |             | 15,053                | 1,641          | 74,872       | 2,46               | 4,44                 | n.a.   |
| 2      |             | 15,222                | 1,668          | 75,188       | 2,50               | 4,45                 | n.a.   |
| 3      |             | 15,645                | 11,316         | 354,707      | 16,99              | 21,02                | n.a.   |
| 4      |             | 15,990                | 7,802          | 291,892      | 11,72              | 17,29                | n.a.   |
| 5      |             | 16,645                | 44,172         | 891,211      | 66,33              | 52,80                | n.a.   |
| n.a.   | Component 4 | n.a.                  | n.a.           | n.a.         | n.a.               | n.a.                 | n.a.   |
| n.a.   | Component 5 | n.a.                  | n.a.           | n.a.         | n.a.               | n.a.                 | n.a.   |
| Total: |             |                       | 66,600         | 1687,870     | 100,00             | 100,00               |        |



File :D:\MSDChem\1\DATA\2001\JY-5-122-27.D  
Operator :  
Acquired : 11 Jan 2020 14:32 using AcqMethod SK3-30X.M  
Instrument : GC-MSD  
Sample Name : JY-5-122-27  
Misc Info :  
Vial Number: 31

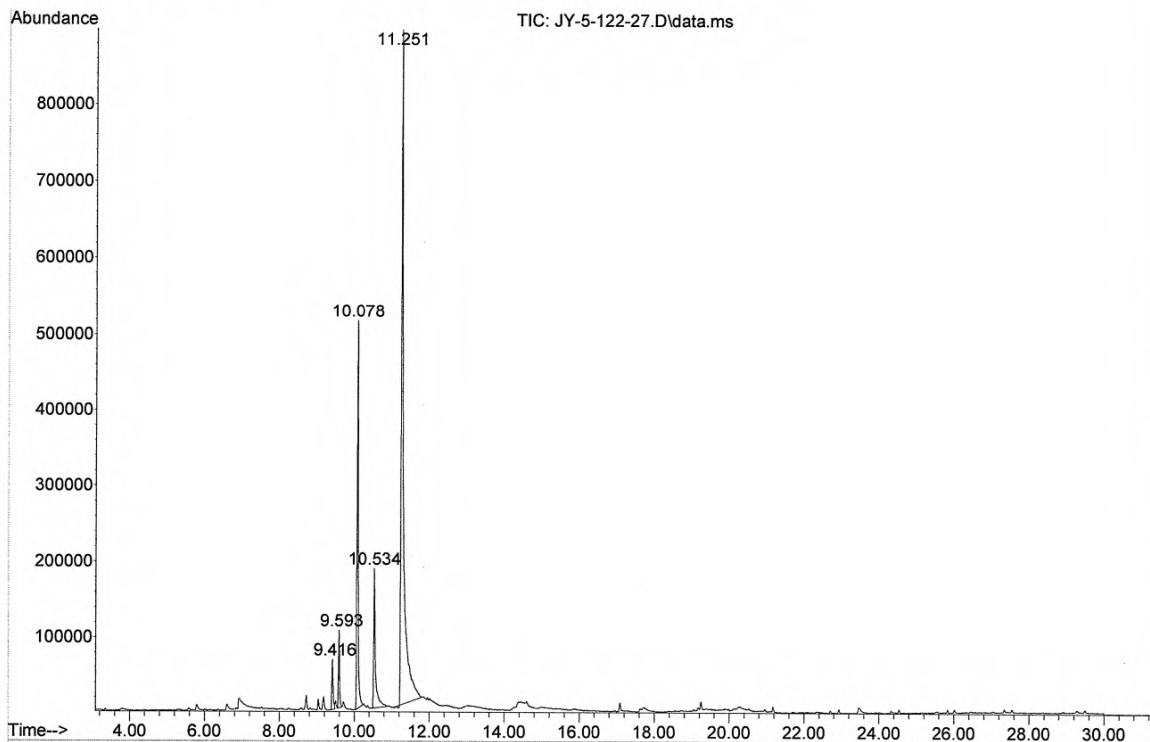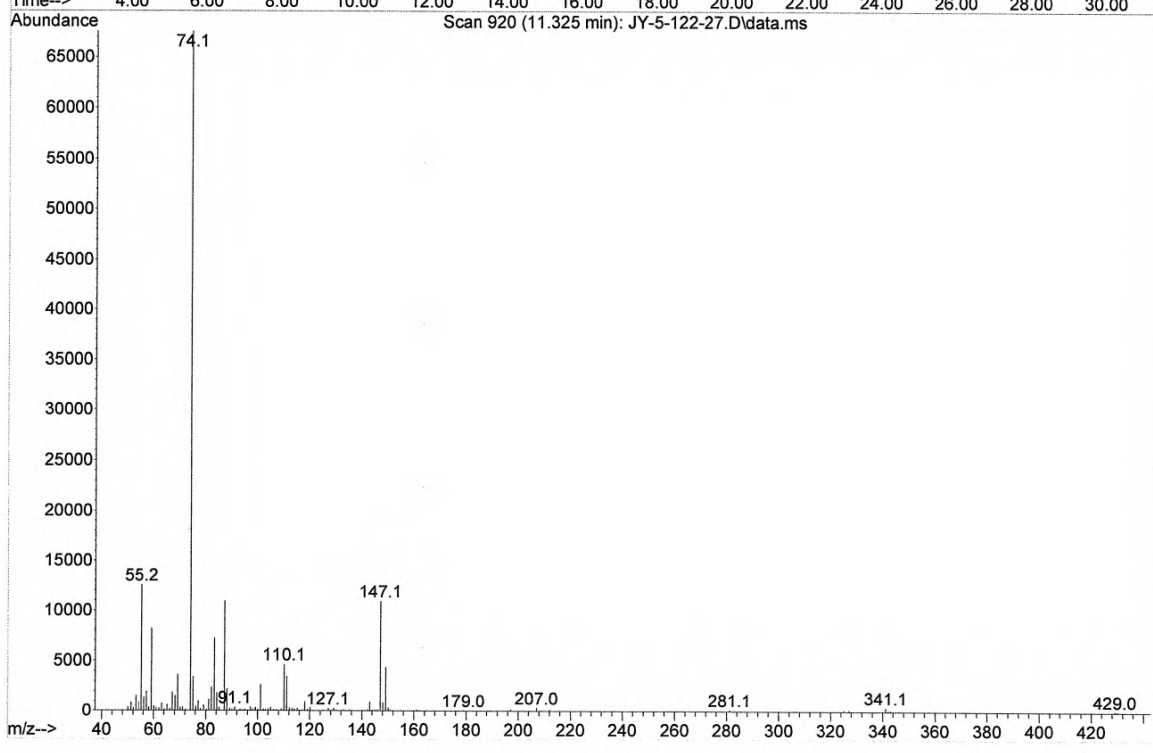

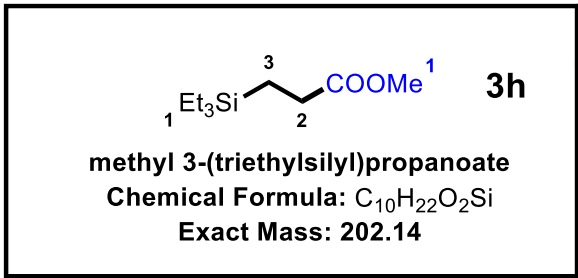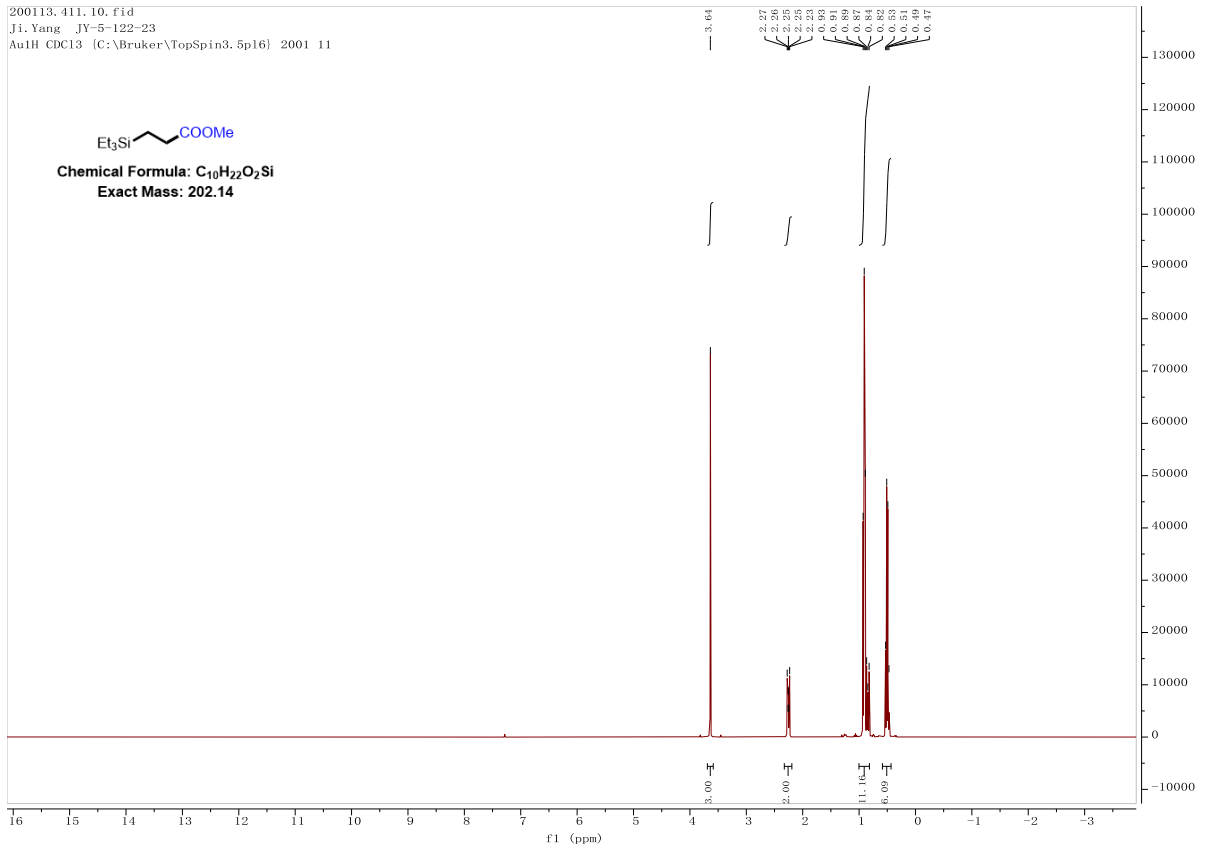

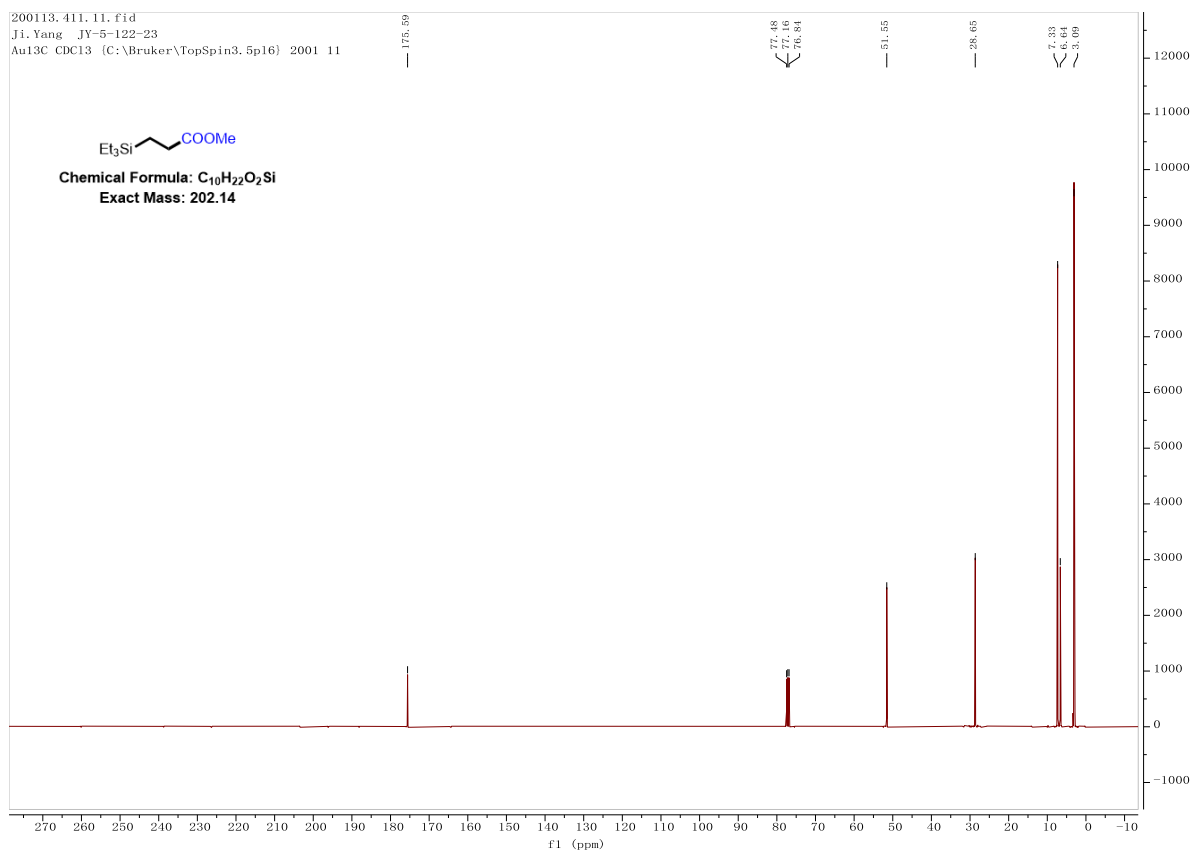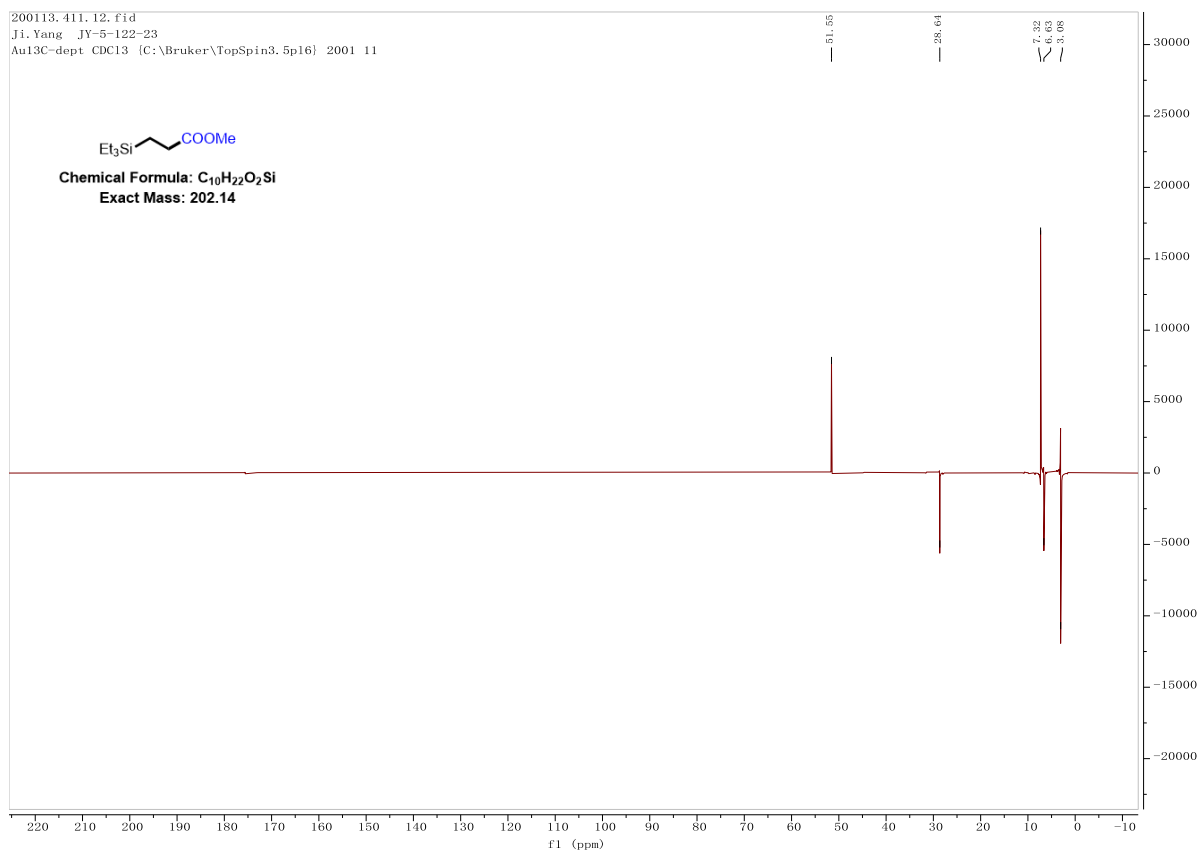

## Chromatogram and Results

| Injection Details    |                   |                   |               |
|----------------------|-------------------|-------------------|---------------|
| Injection Name:      | JY-5-122-14-26-10 | Run Time (min):   | 40,00         |
| Vial Number:         | 120               | Injection Volume: | 2,00          |
| Injection Type:      | Unknown           | Channel:          | FrontDetector |
| Calibration Level:   |                   | Wavelength:       | n.a.          |
| Instrument Method:   | dong-40min        | Bandwidth:        | n.a.          |
| Processing Method:   | dong              | Dilution Factor:  | 1,0000        |
| Injection Date/Time: | 10.Jan.20 16:02   | Sample Weight:    | 1,0000        |

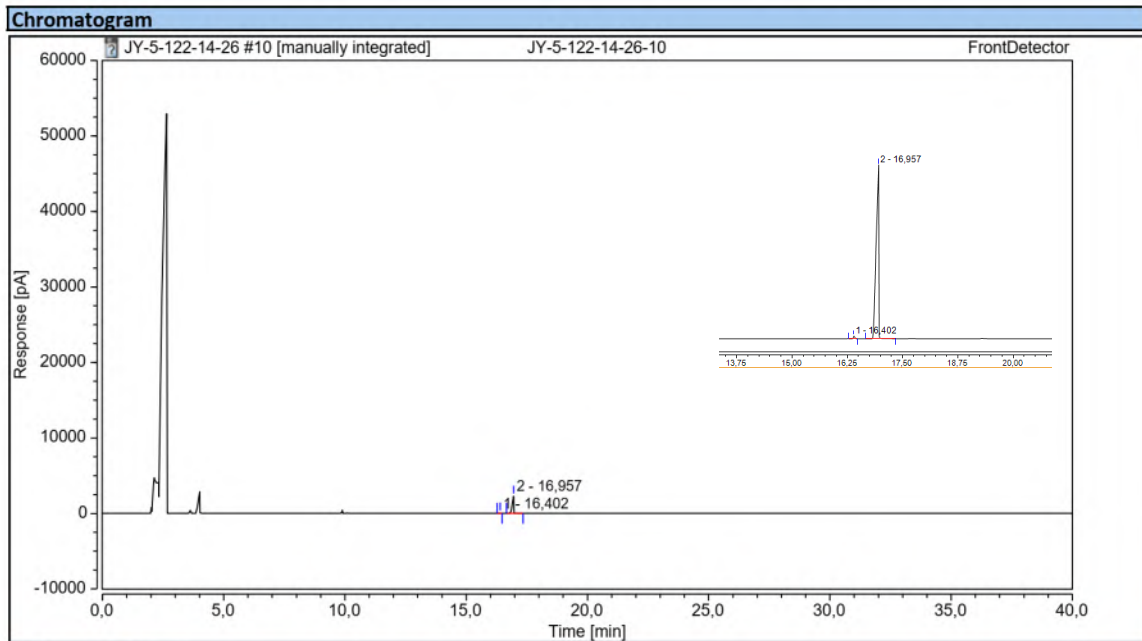

| Integration Results |             |                       |                |              |                    |                      |        |
|---------------------|-------------|-----------------------|----------------|--------------|--------------------|----------------------|--------|
| No.                 | Peak Name   | Retention Time<br>min | Area<br>pA*min | Height<br>pA | Relative Area<br>% | Relative Height<br>% | Amount |
| n.a.                | Component 2 | n.a.                  | n.a.           | n.a.         | n.a.               | n.a.                 | n.a.   |
| n.a.                | Component 3 | n.a.                  | n.a.           | n.a.         | n.a.               | n.a.                 | n.a.   |
| 1                   |             | 16,402                | 1,006          | 36,134       | 0,64               | 1,56                 | n.a.   |
| 2                   |             | 16,957                | 155,836        | 2276,370     | 99,36              | 98,44                | n.a.   |
| n.a.                | Component 4 | n.a.                  | n.a.           | n.a.         | n.a.               | n.a.                 | n.a.   |
| n.a.                | Component 5 | n.a.                  | n.a.           | n.a.         | n.a.               | n.a.                 | n.a.   |
| Total:              |             |                       | 156,842        | 2312,504     | 100,00             | 100,00               |        |

File :D:\MSDChem\1\DATA\2001\JY-5-122-23.D  
Operator :  
Acquired : 10 Jan 2020 16:58 using AcqMethod SK3-30X.M  
Instrument : GC-MSD  
Sample Name: JY-5-122-23  
Misc Info :  
Vial Number: 45

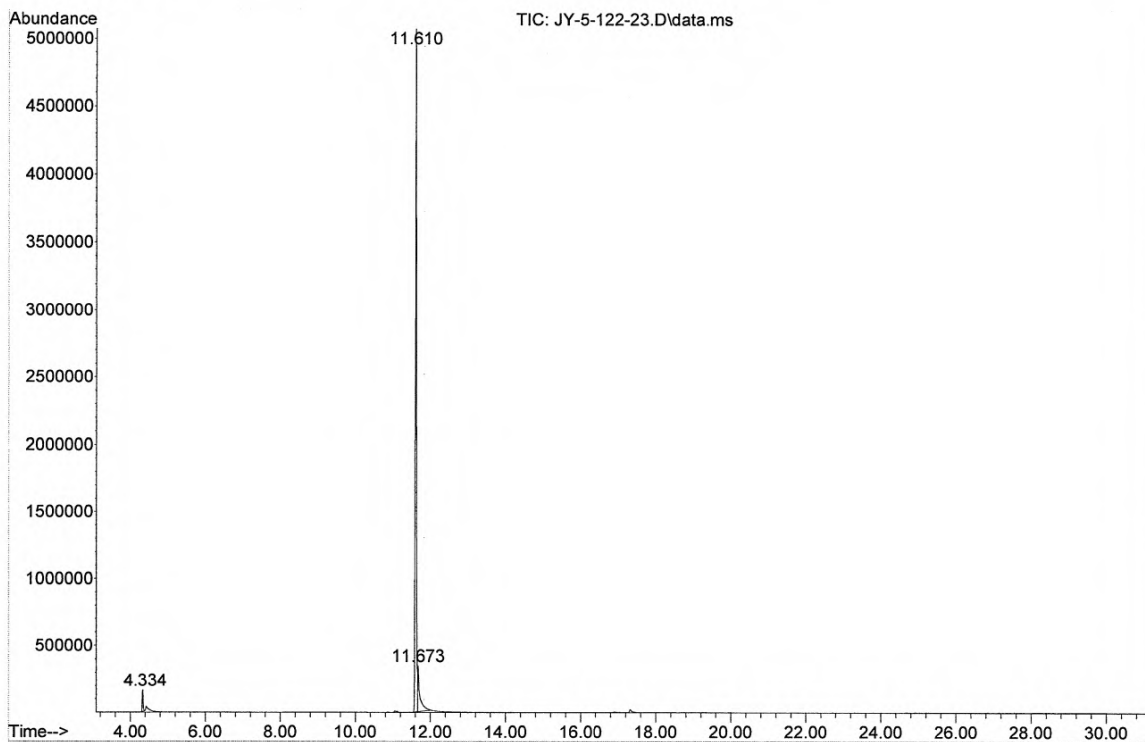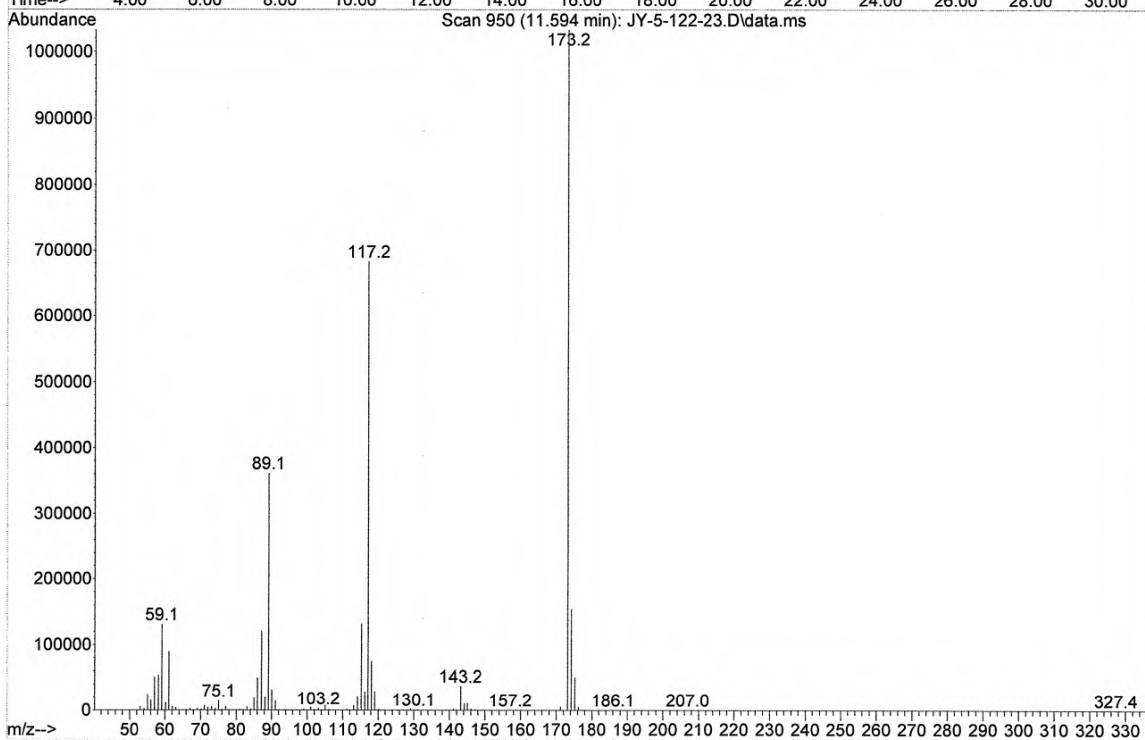

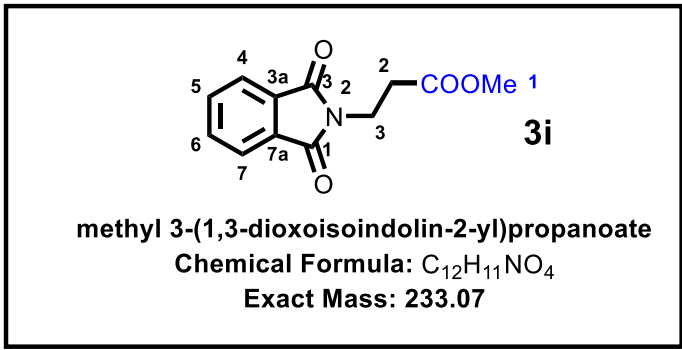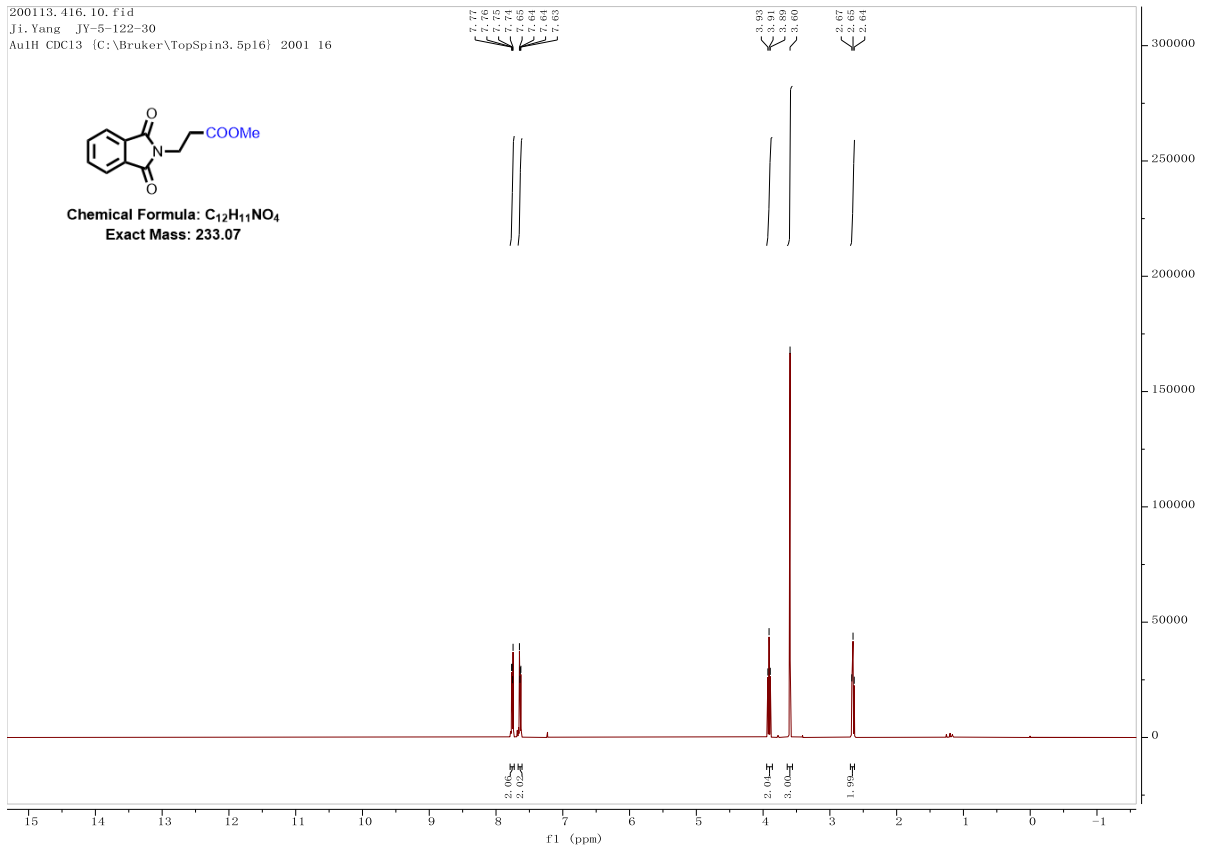

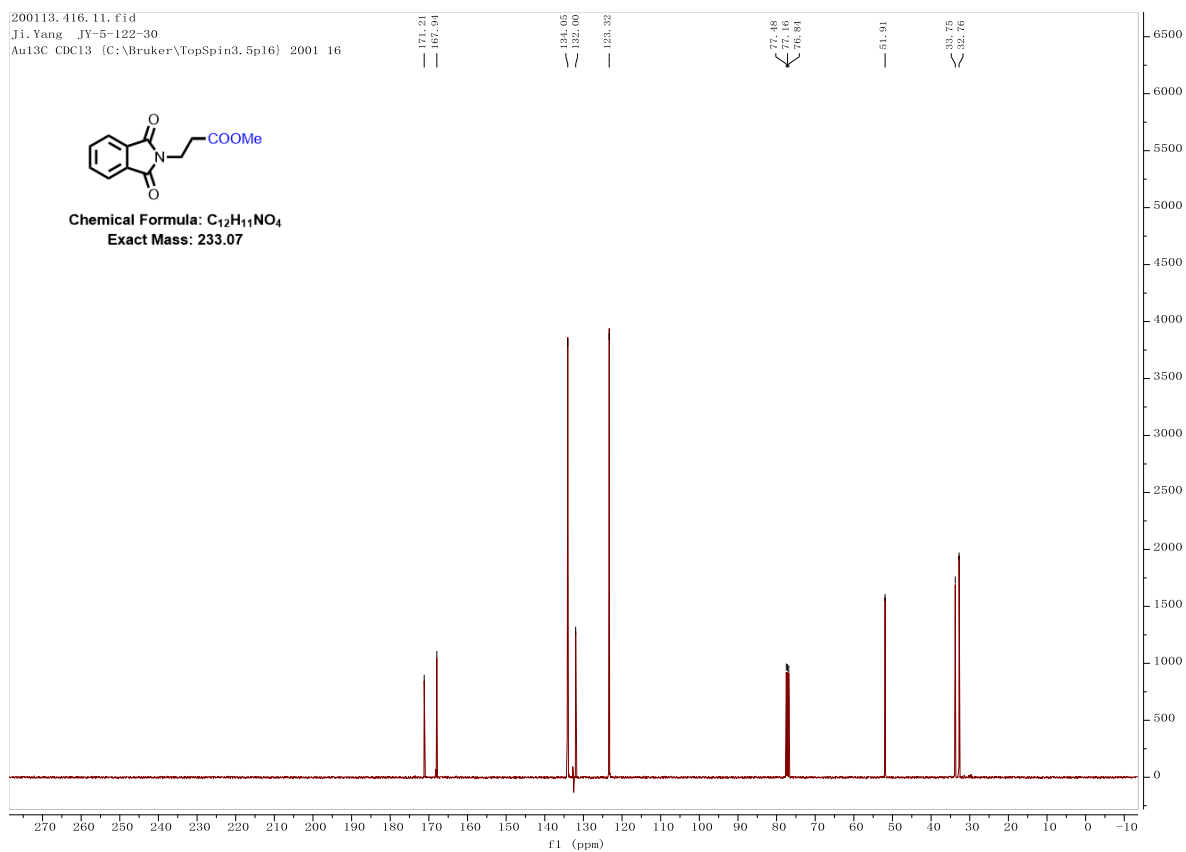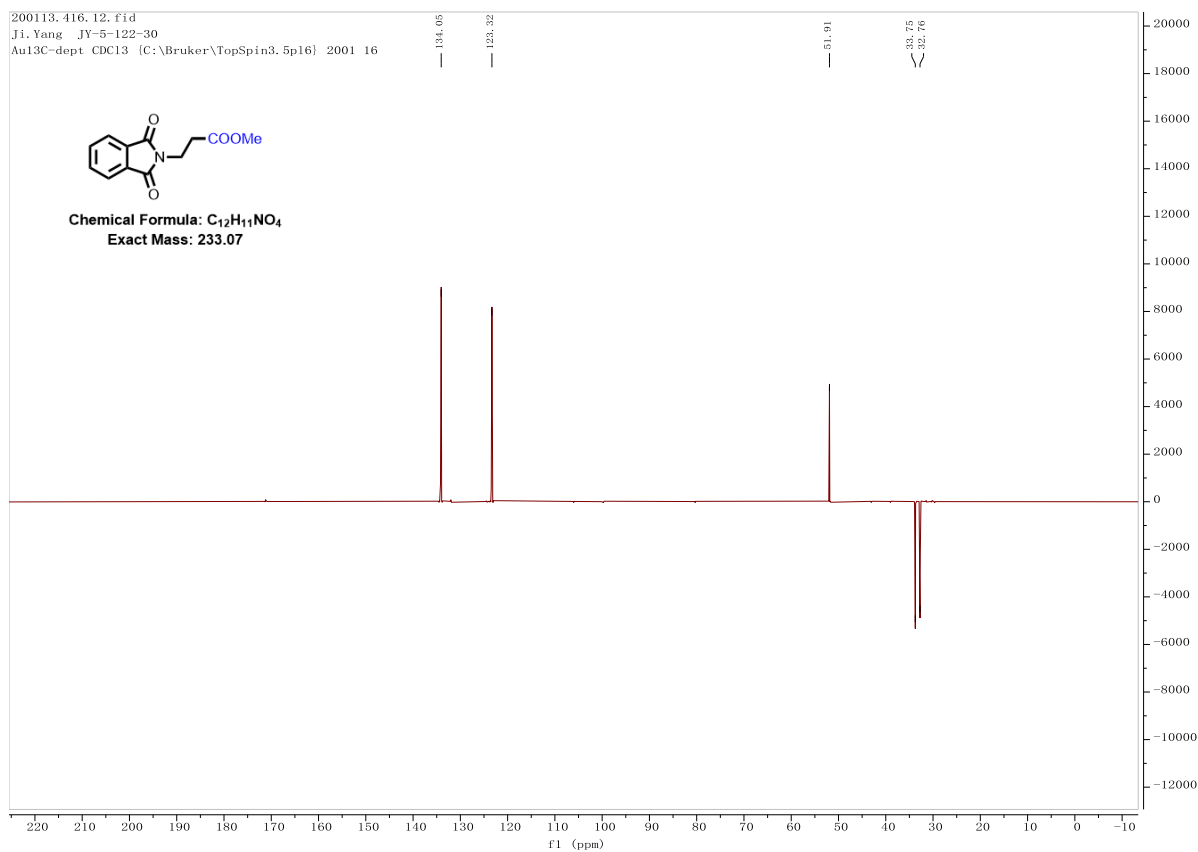

### Chromatogram and Results

| Injection Details    |                  |                         |
|----------------------|------------------|-------------------------|
| Injection Name:      | JY-5-122-27-39-4 | Run Time (min): 40,00   |
| Vial Number:         | 28               | Injection Volume: 2,00  |
| Injection Type:      | Unknown          | Channel: FrontDetector  |
| Calibration Level:   |                  | Wavelength: n.a.        |
| Instrument Method:   | dong-40min       | Bandwidth: n.a.         |
| Processing Method:   | dong             | Dilution Factor: 1,0000 |
| Injection Date/Time: | 11.Jan.20 16:26  | Sample Weight: 1,0000   |

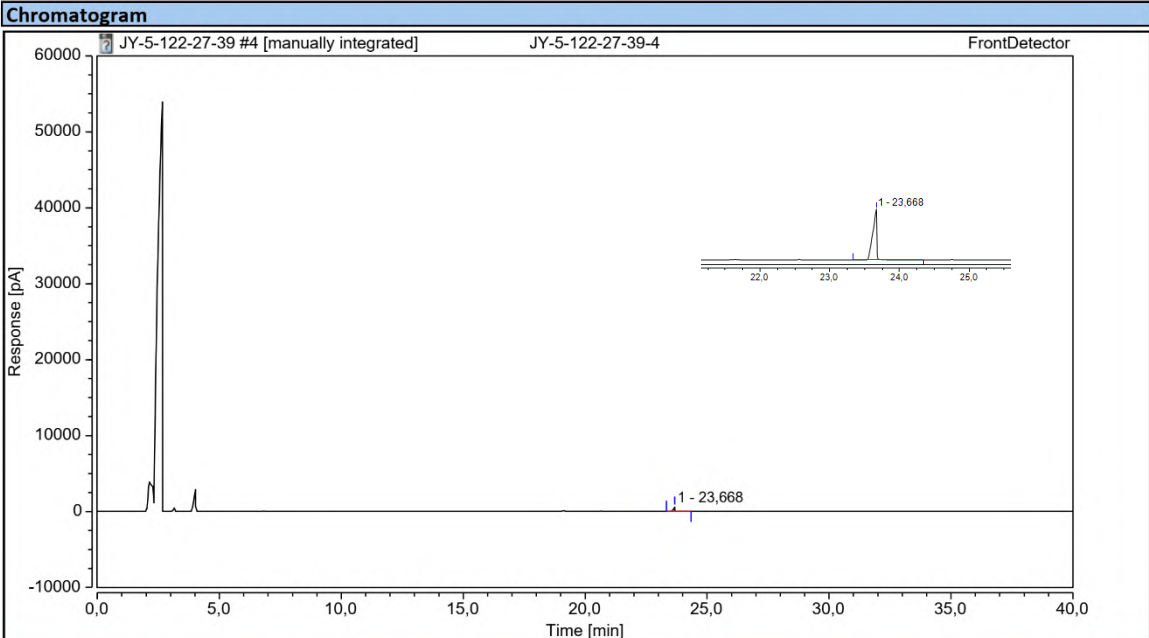

| Integration Results |             |                       |                |                |                    |                      |        |
|---------------------|-------------|-----------------------|----------------|----------------|--------------------|----------------------|--------|
| No.                 | Peak Name   | Retention Time<br>min | Area<br>pA*min | Height<br>pA   | Relative Area<br>% | Relative Height<br>% | Amount |
| n.a.                | Component 2 | n.a.                  | n.a.           | n.a.           | n.a.               | n.a.                 | n.a.   |
| n.a.                | Component 3 | n.a.                  | n.a.           | n.a.           | n.a.               | n.a.                 | n.a.   |
| n.a.                | Component 4 | n.a.                  | n.a.           | n.a.           | n.a.               | n.a.                 | n.a.   |
| n.a.                | Component 5 | n.a.                  | n.a.           | n.a.           | n.a.               | n.a.                 | n.a.   |
| 1                   |             | 23,668                | 37,672         | 555,035        | 100,00             | 100,00               | n.a.   |
| <b>Total:</b>       |             |                       | <b>37,672</b>  | <b>555,035</b> | <b>100,00</b>      | <b>100,00</b>        |        |



File :D:\MSDChem\1\DATA\2001\JY-5-122-30.D  
Operator :  
Acquired : 11 Jan 2020 17:06 using AcqMethod SK3-45X.M  
Instrument : GC-MSD  
Sample Name: JY-5-122-30  
Misc Info :  
Vial Number: 34

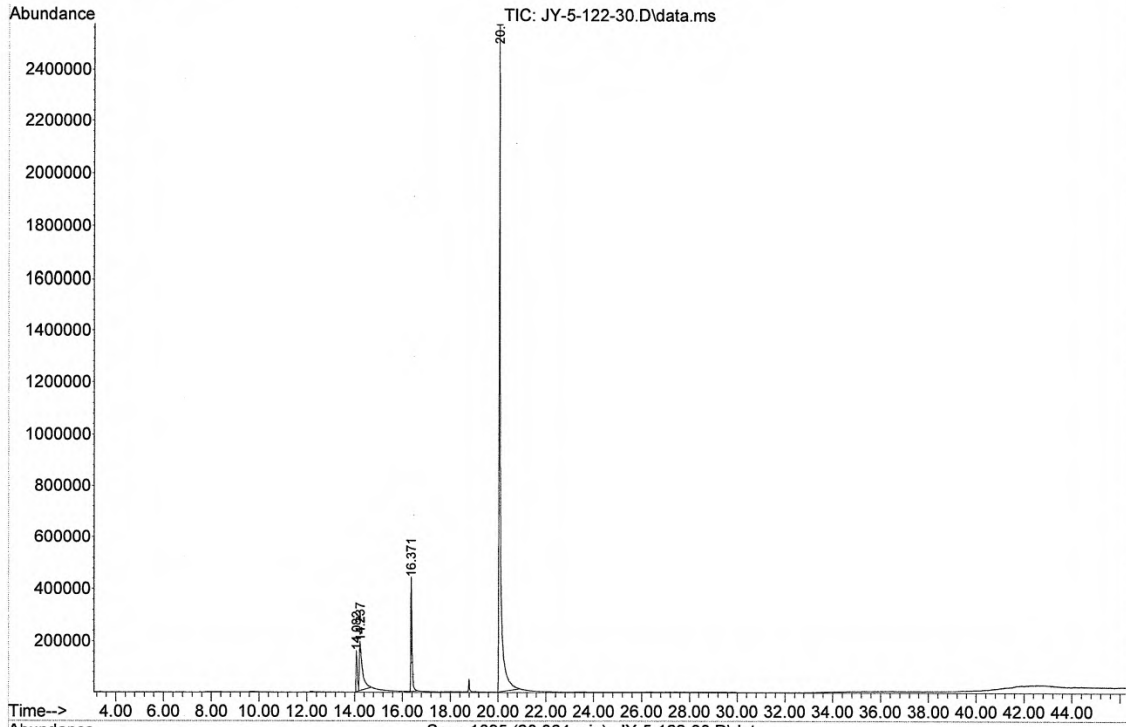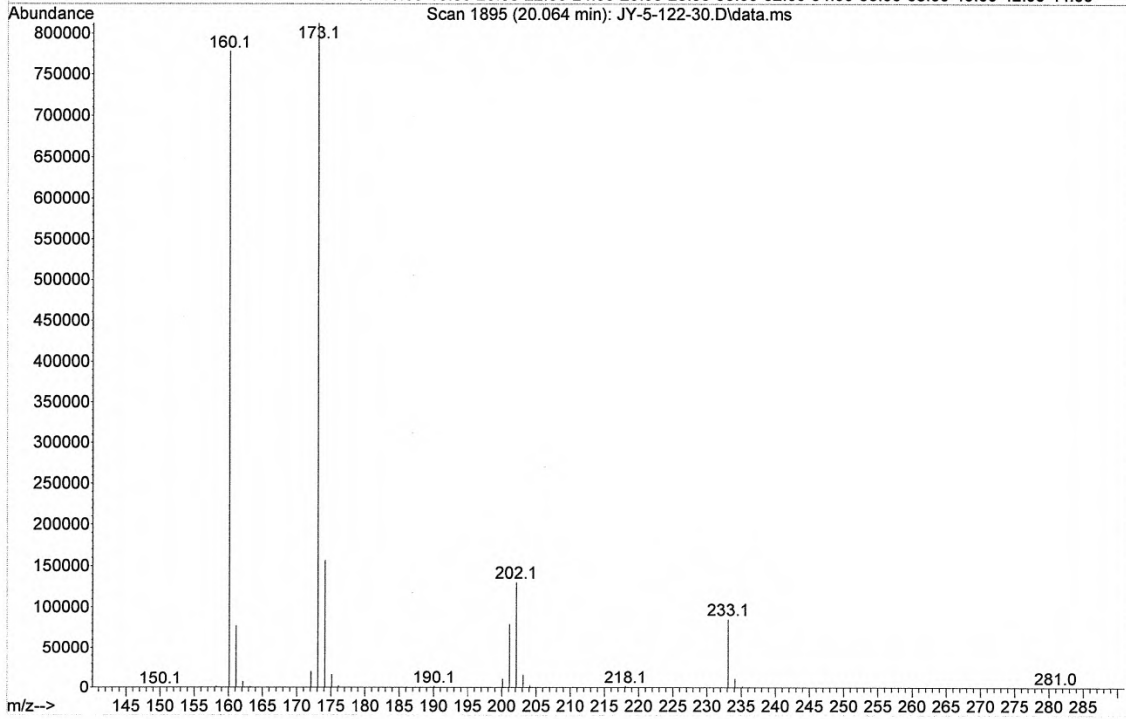

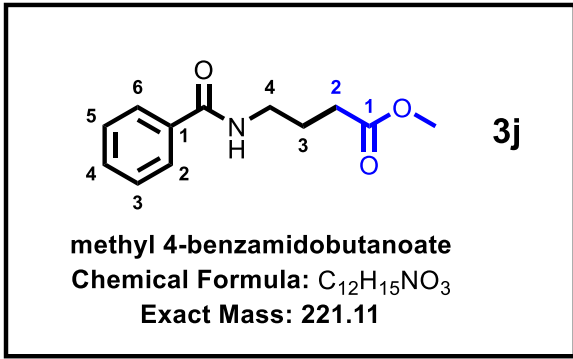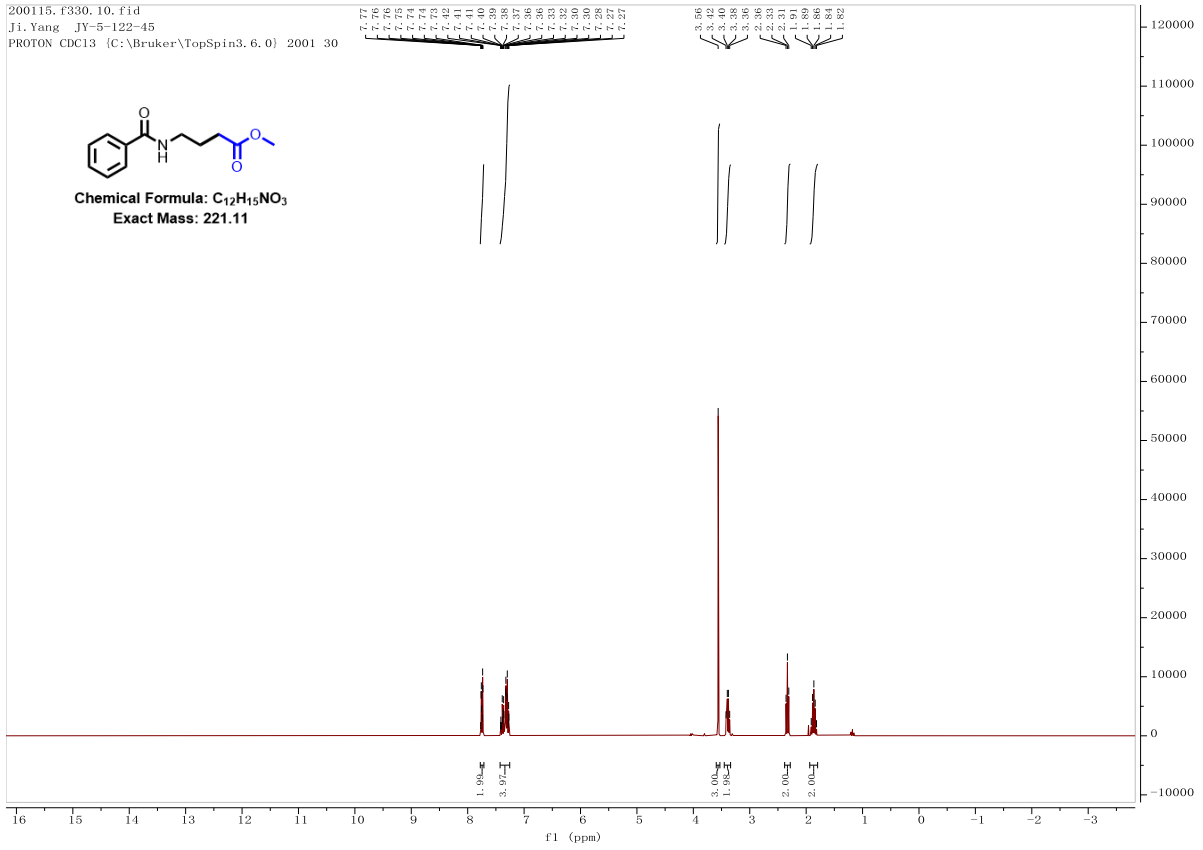

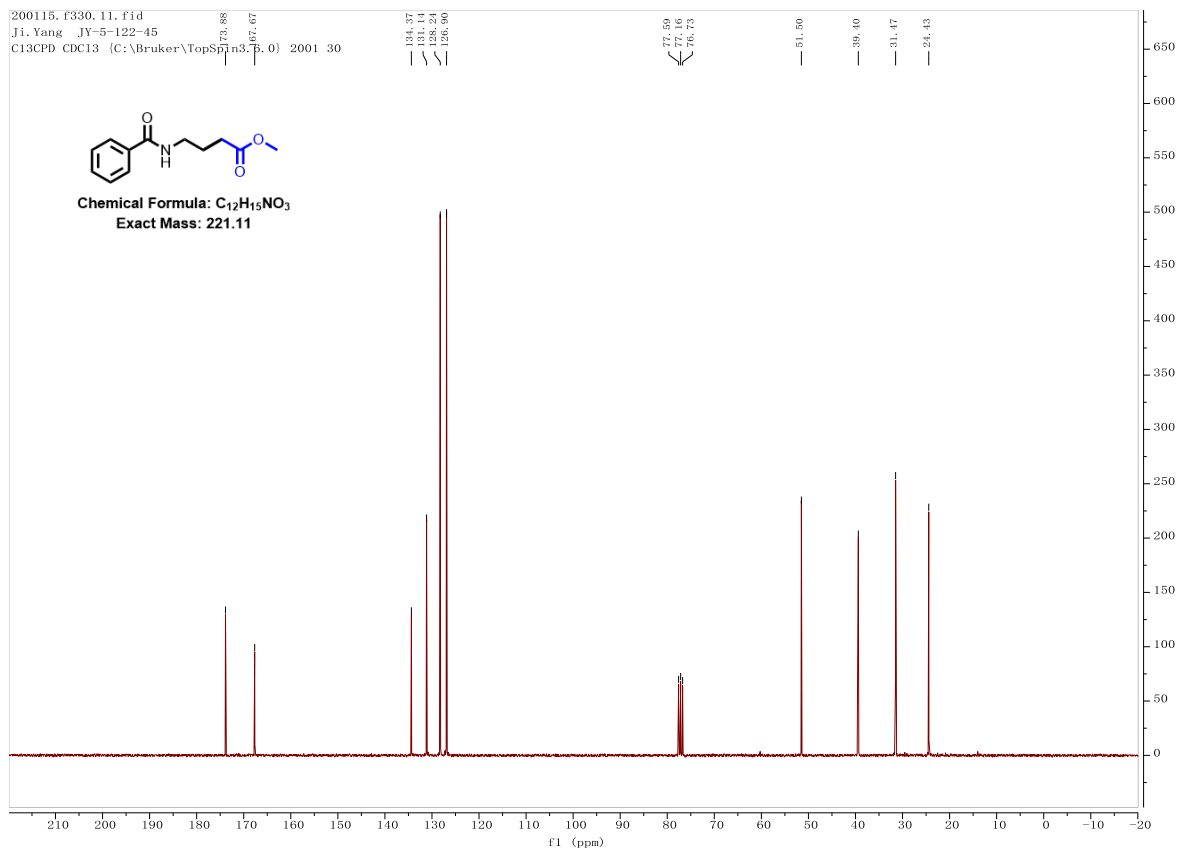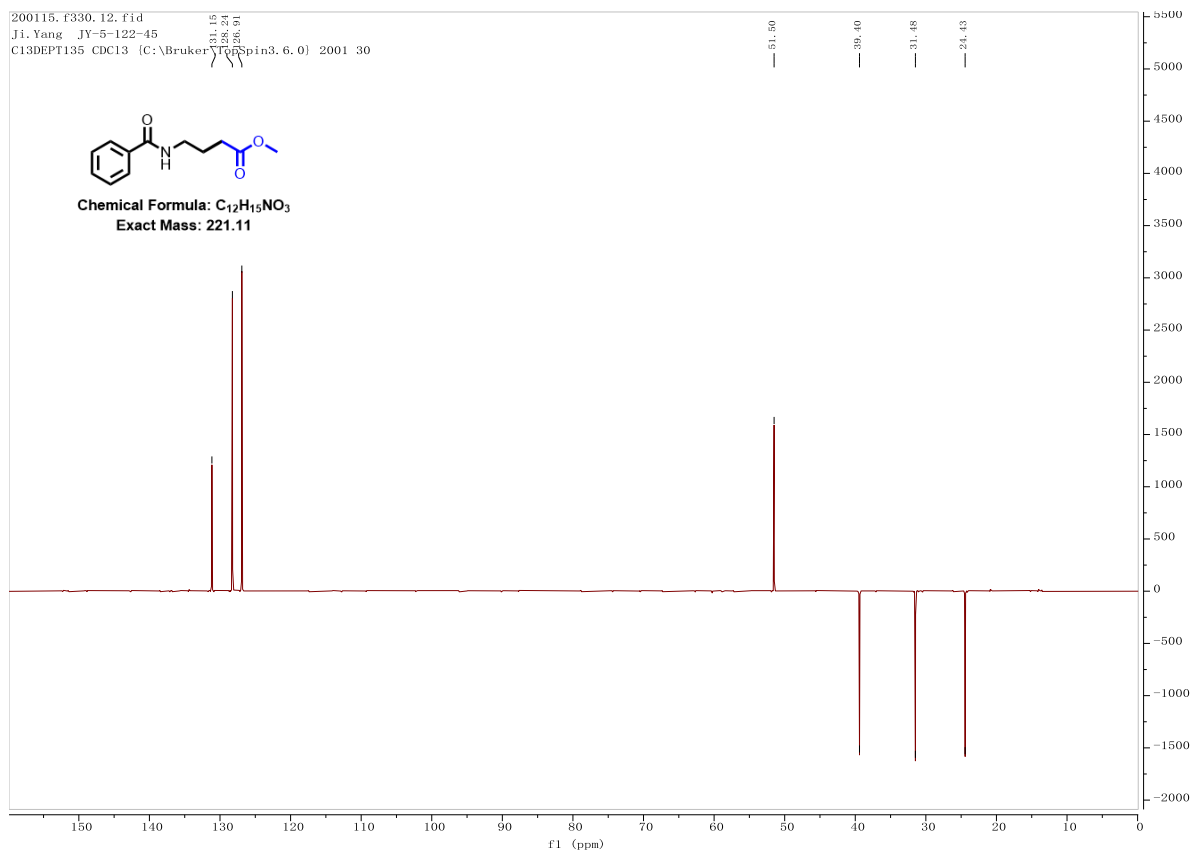

## Chromatogram and Results

| Injection Details    |                 |                         |
|----------------------|-----------------|-------------------------|
| Injection Name:      | JY-5-122-43-45  | Run Time (min): 40,00   |
| Vial Number:         | 75              | Injection Volume: 2,00  |
| Injection Type:      | Unknown         | Channel: FrontDetector  |
| Calibration Level:   |                 | Wavelength: n.a.        |
| Instrument Method:   | dong-40min      | Bandwidth: n.a.         |
| Processing Method:   | dong            | Dilution Factor: 1,0000 |
| Injection Date/Time: | 13.Jan.20 16:34 | Sample Weight: 1,0000   |

### Chromatogram

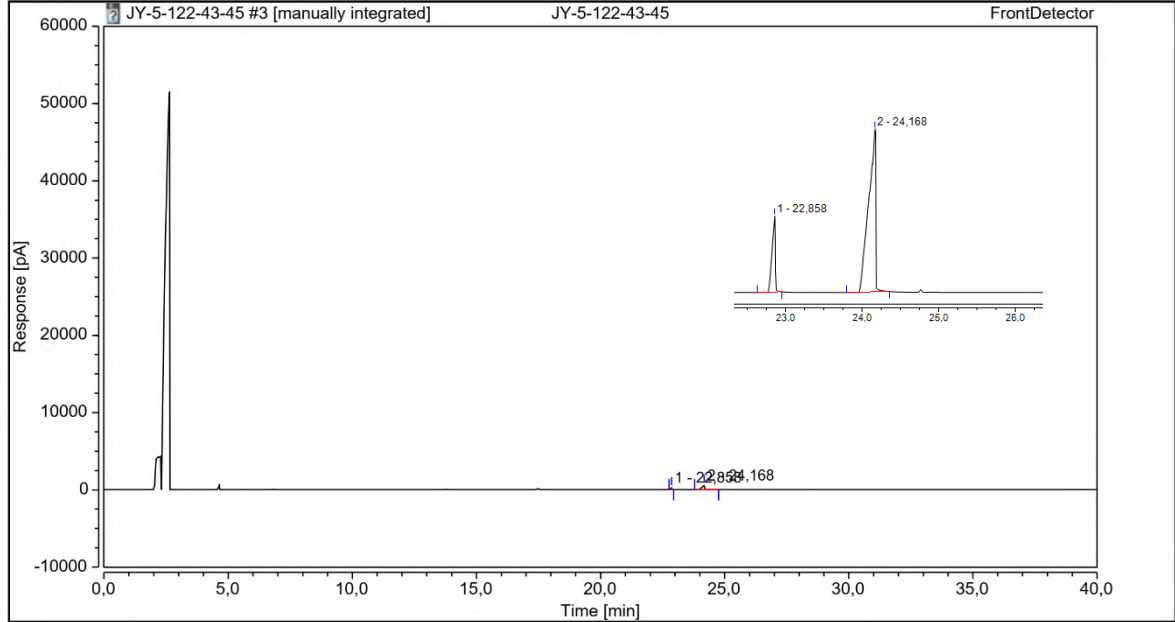

| Integration Results |             |                       |                |              |                    |                      |        |
|---------------------|-------------|-----------------------|----------------|--------------|--------------------|----------------------|--------|
| No.                 | Peak Name   | Retention Time<br>min | Area<br>pA*min | Height<br>pA | Relative Area<br>% | Relative Height<br>% | Amount |
| n.a.                | Component 2 | n.a.                  | n.a.           | n.a.         | n.a.               | n.a.                 | n.a.   |
| n.a.                | Component 3 | n.a.                  | n.a.           | n.a.         | n.a.               | n.a.                 | n.a.   |
| n.a.                | Component 4 | n.a.                  | n.a.           | n.a.         | n.a.               | n.a.                 | n.a.   |
| n.a.                | Component 5 | n.a.                  | n.a.           | n.a.         | n.a.               | n.a.                 | n.a.   |
| 1                   |             | 22,858                | 12,569         | 264,111      | 17,91              | 31,93                | n.a.   |
| 2                   |             | 24,168                | 57,625         | 562,972      | 82,09              | 68,07                | n.a.   |
| Total:              |             |                       | 70,193         | 827,083      | 100,00             | 100,00               |        |

File :D:\MSDChem\1\DATA\2001\JY-122-45.D  
Operator :  
Acquired : 13 Jan 2020 16:33 using AcqMethod SK3-30X.M  
Instrument : GC-MSD  
Sample Name: JY-122-45  
Misc Info :  
Vial Number: 48

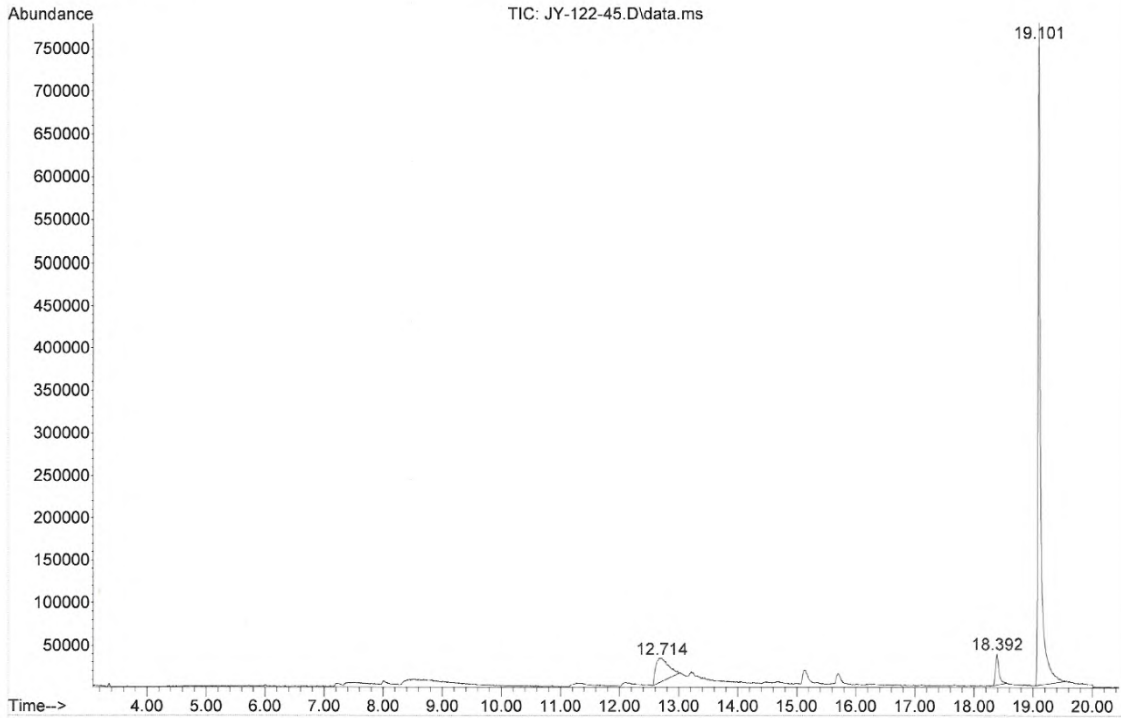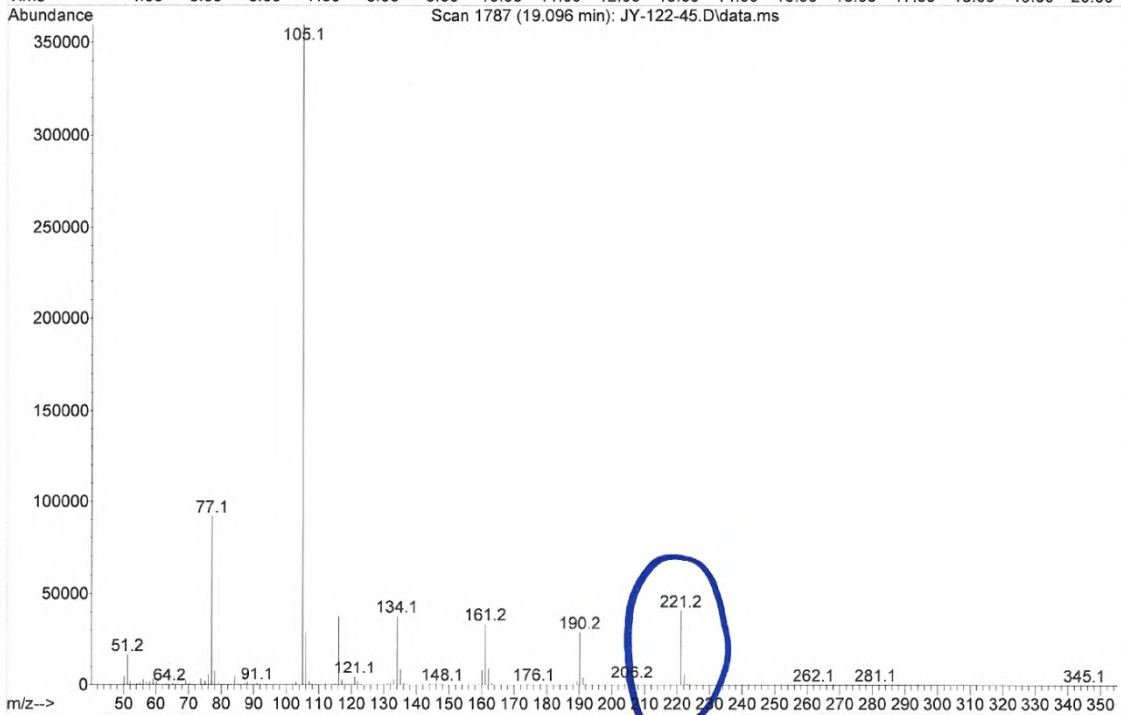

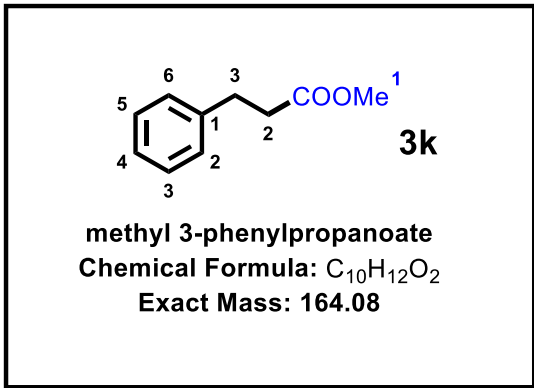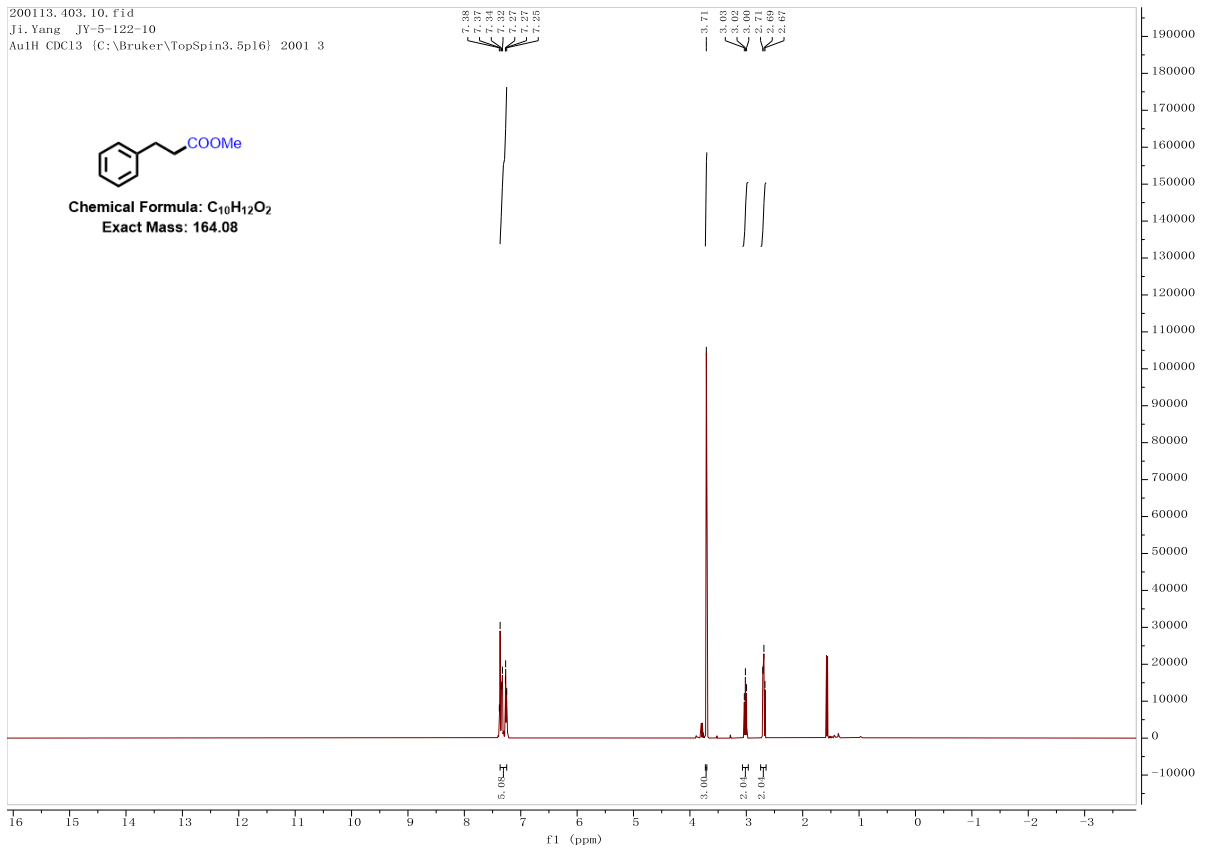

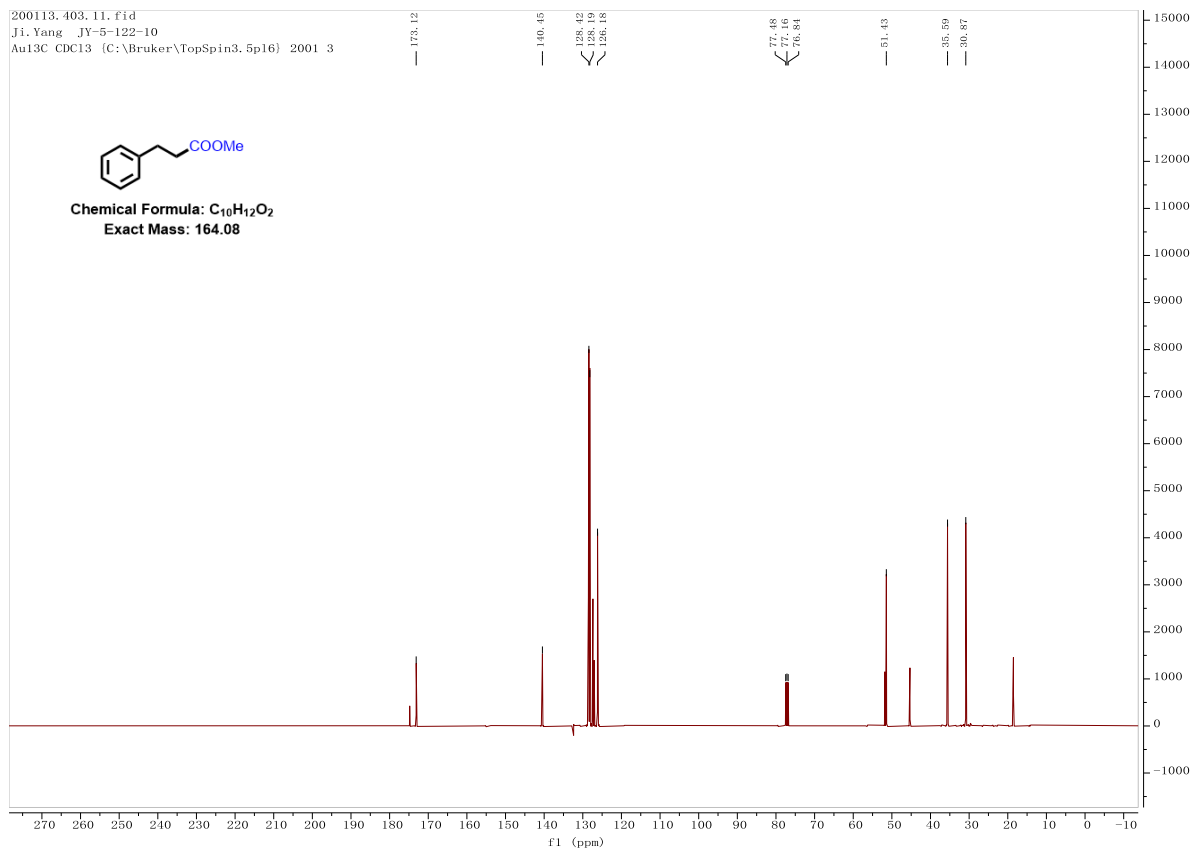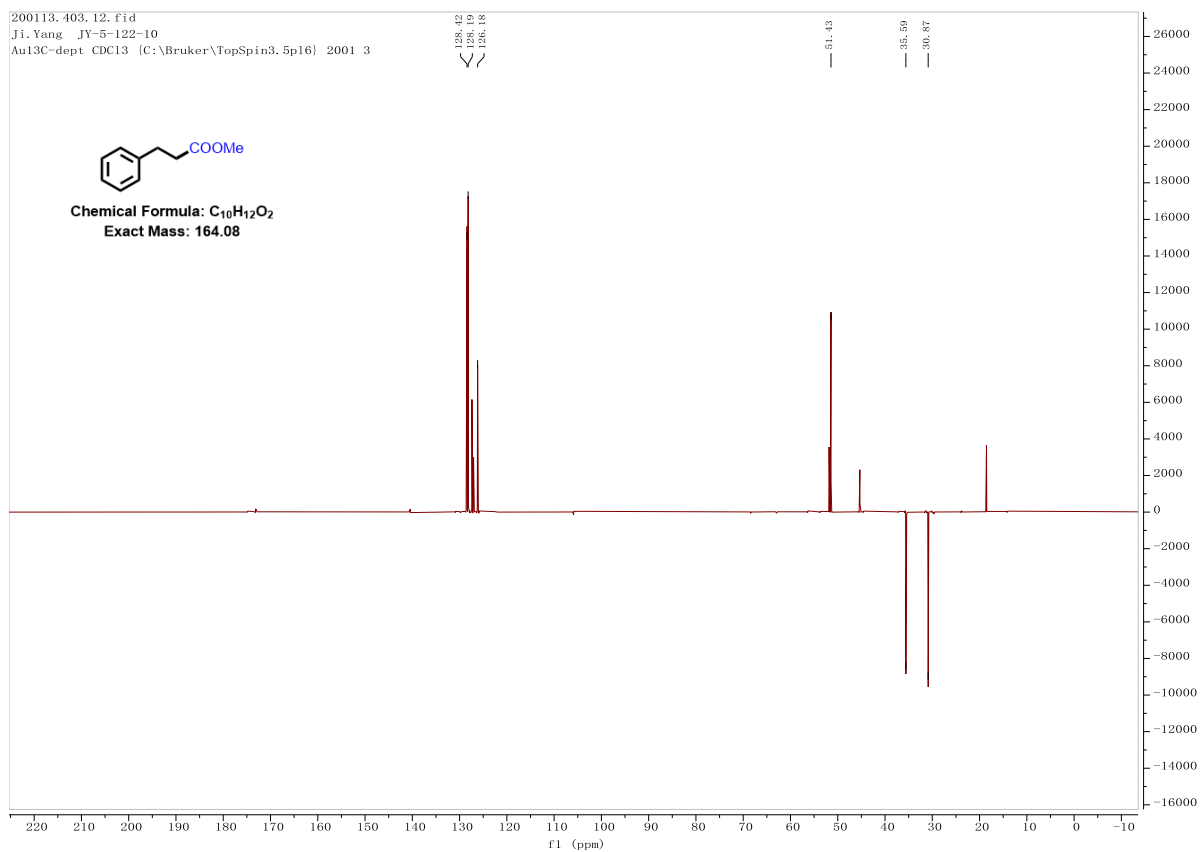

### Chromatogram and Results

| Injection Details    |                 |                         |
|----------------------|-----------------|-------------------------|
| Injection Name:      | JY-5-122-10     | Run Time (min): 40,00   |
| Vial Number:         | 70              | Injection Volume: 2,00  |
| Injection Type:      | Unknown         | Channel: FrontDetector  |
| Calibration Level:   |                 | Wavelength: n.a.        |
| Instrument Method:   | dong-40min      | Bandwidth: n.a.         |
| Processing Method:   | dong            | Dilution Factor: 1,0000 |
| Injection Date/Time: | 10.Jan.20 00:37 | Sample Weight: 1,0000   |

#### Chromatogram

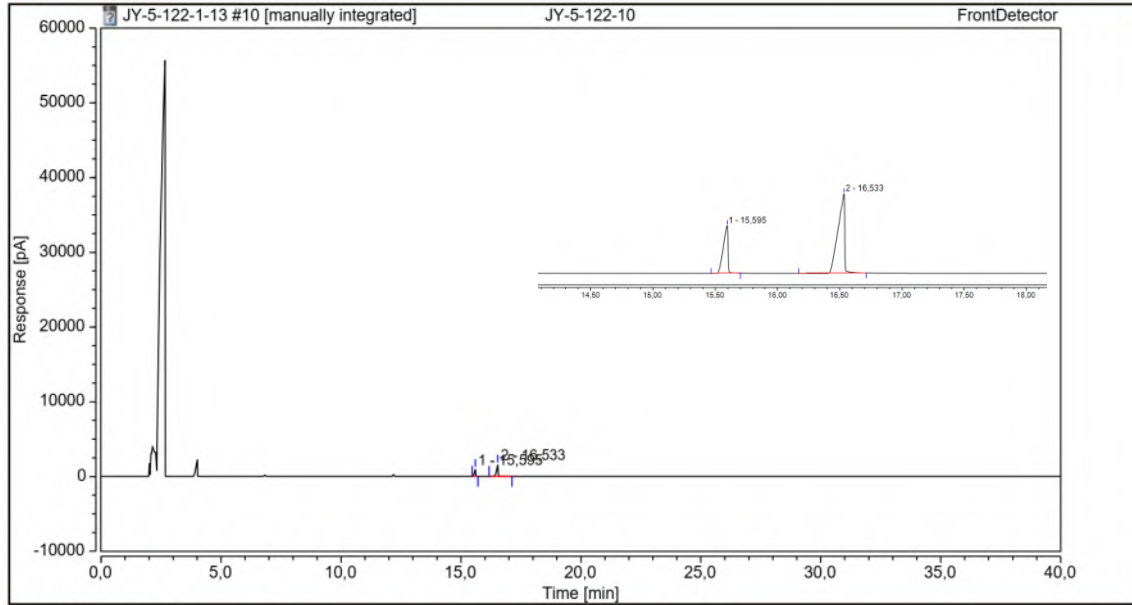

#### Integration Results

| No.    | Peak Name   | Retention Time<br>min | Area<br>pA*min | Height<br>pA | Relative Area<br>% | Relative Height<br>% | Amount |
|--------|-------------|-----------------------|----------------|--------------|--------------------|----------------------|--------|
| n.a.   | Component 2 | n.a.                  | n.a.           | n.a.         | n.a.               | n.a.                 | n.a.   |
| n.a.   | Component 3 | n.a.                  | n.a.           | n.a.         | n.a.               | n.a.                 | n.a.   |
| 1      |             | 15,595                | 39,382         | 905,350      | 28,99              | 37,44                | n.a.   |
| 2      |             | 16,533                | 96,450         | 1512,600     | 71,01              | 62,56                | n.a.   |
| n.a.   | Component 4 | n.a.                  | n.a.           | n.a.         | n.a.               | n.a.                 | n.a.   |
| n.a.   | Component 5 | n.a.                  | n.a.           | n.a.         | n.a.               | n.a.                 | n.a.   |
| Total: |             |                       | 135,831        | 2417,950     | 100,00             | 100,00               |        |



File :D:\MSDChem\1\DATA\2001\JY-5-122-10.D  
Operator :  
Acquired : 9 Jan 2020 20:57 using AcqMethod SK3-30X.M  
Instrument : GC-MSD  
Sample Name: JY-5-122-10  
Misc Info :  
Vial Number: 45

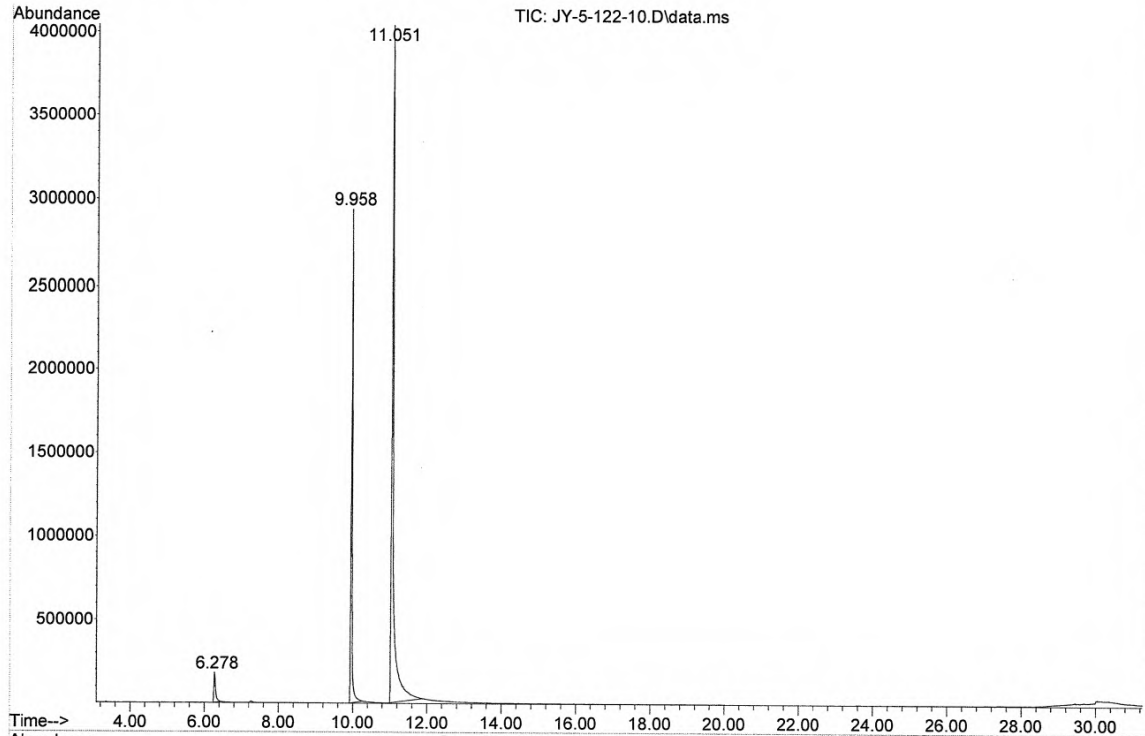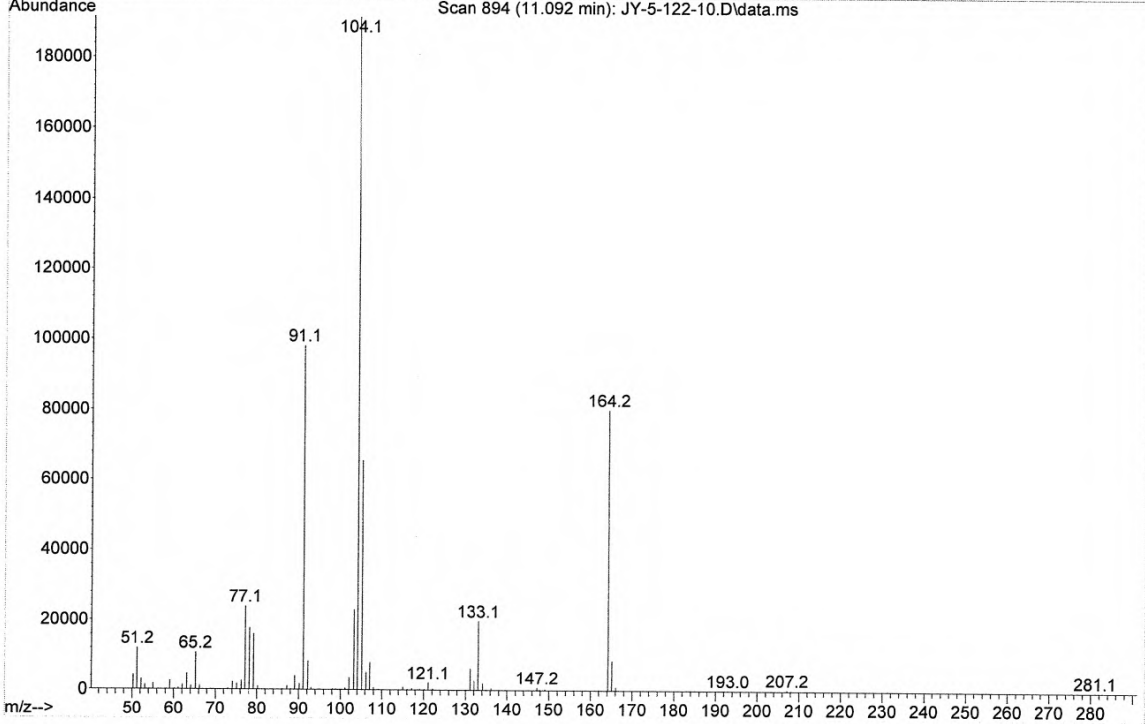

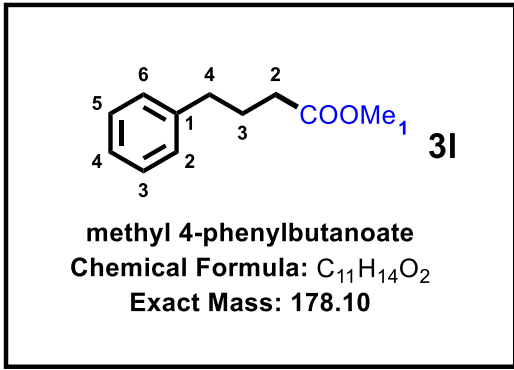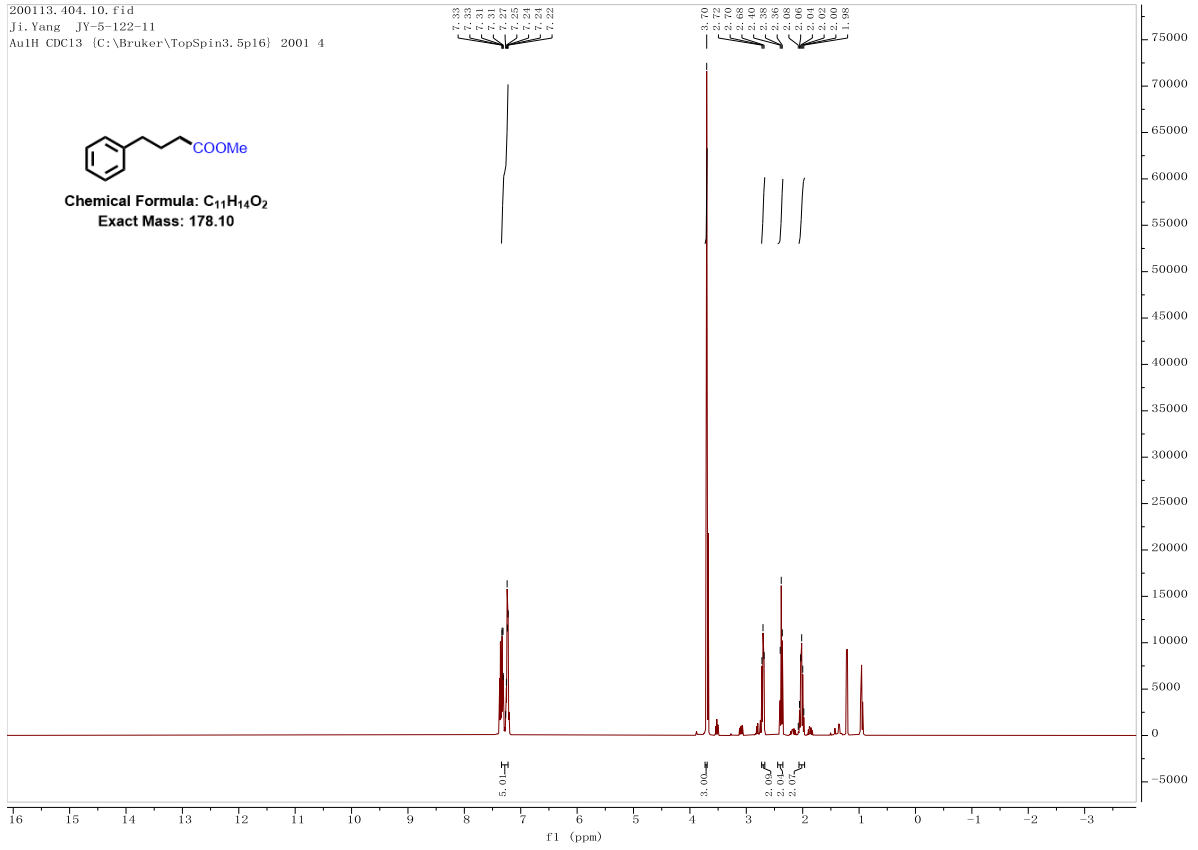

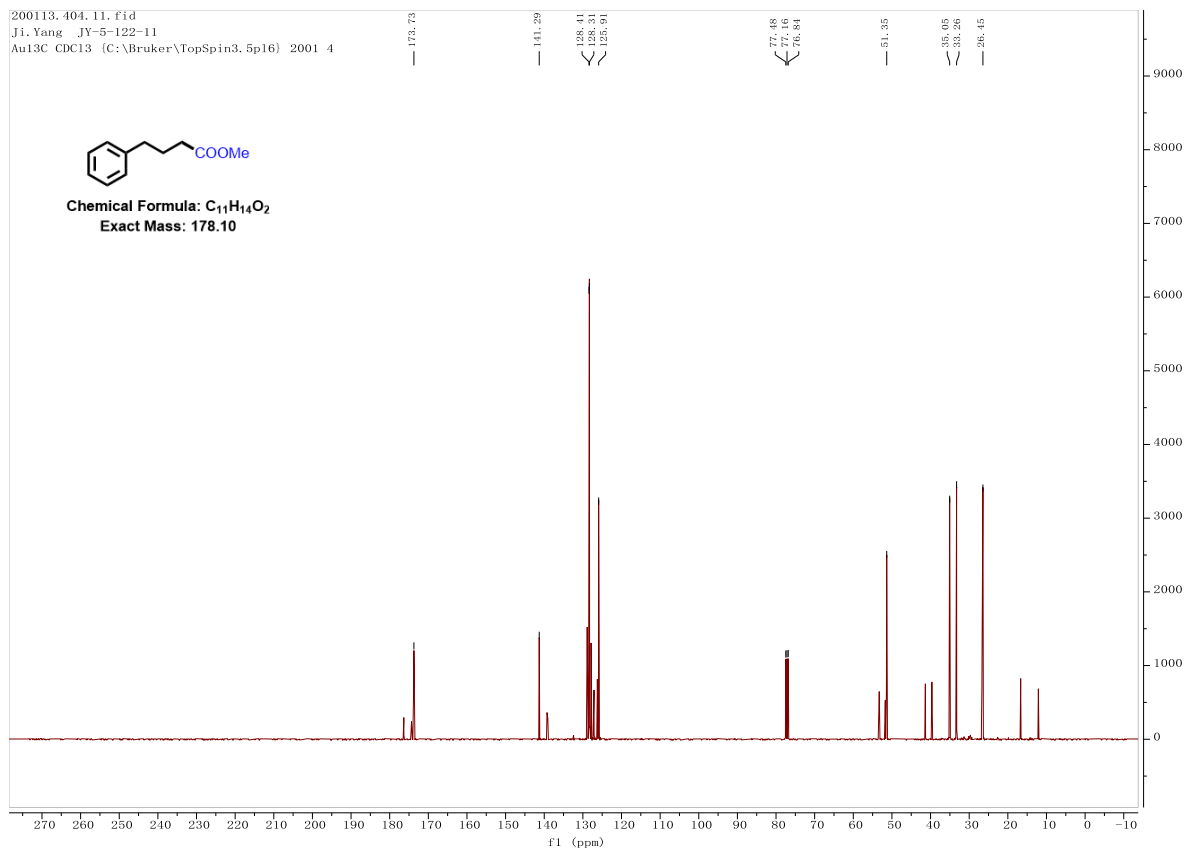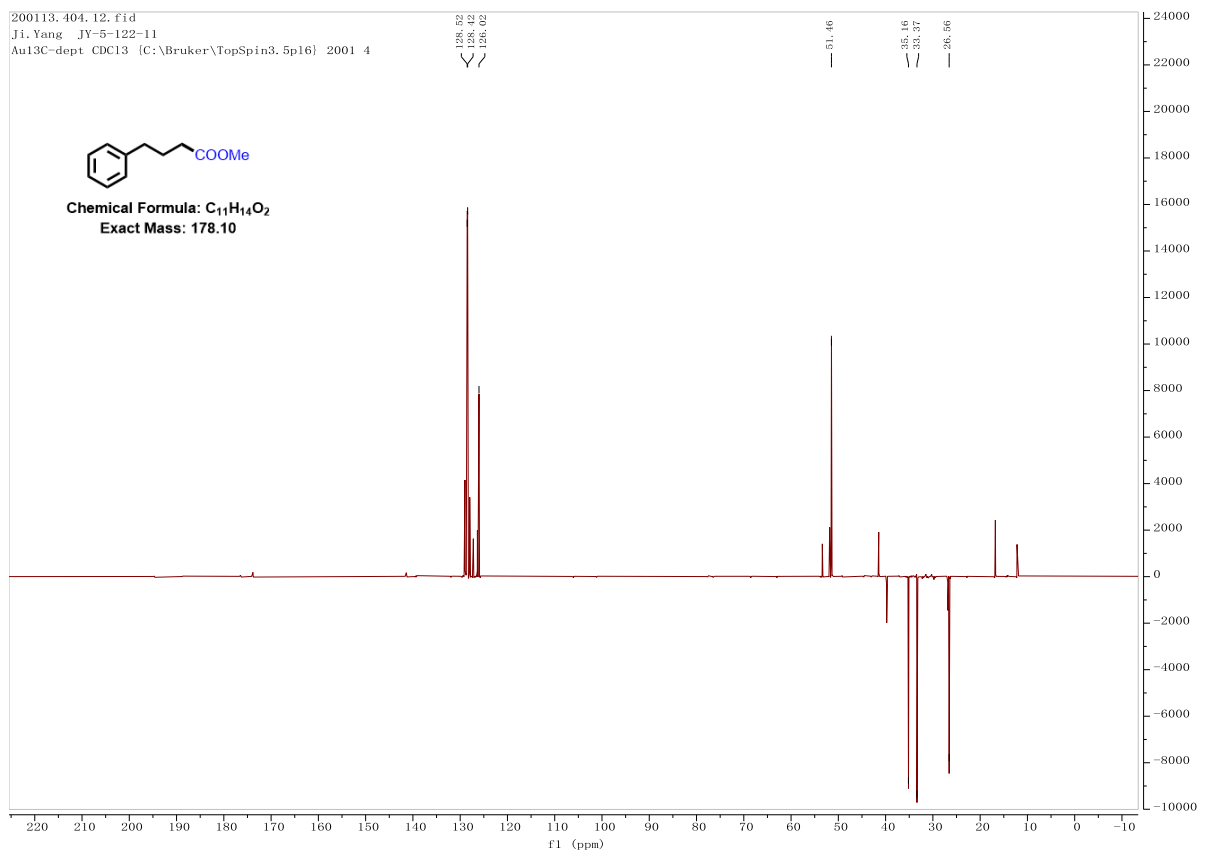

## Chromatogram and Results

| Injection Details    |                 |                   |               |
|----------------------|-----------------|-------------------|---------------|
| Injection Name:      | JY-5-122-11     | Run Time (min):   | 40,00         |
| Vial Number:         | 71              | Injection Volume: | 2,00          |
| Injection Type:      | Unknown         | Channel:          | FrontDetector |
| Calibration Level:   |                 | Wavelength:       | n.a.          |
| Instrument Method:   | dong-40min      | Bandwidth:        | n.a.          |
| Processing Method:   | dong            | Dilution Factor:  | 1,0000        |
| Injection Date/Time: | 10.Jan.20 01:38 | Sample Weight:    | 1,0000        |

### Chromatogram

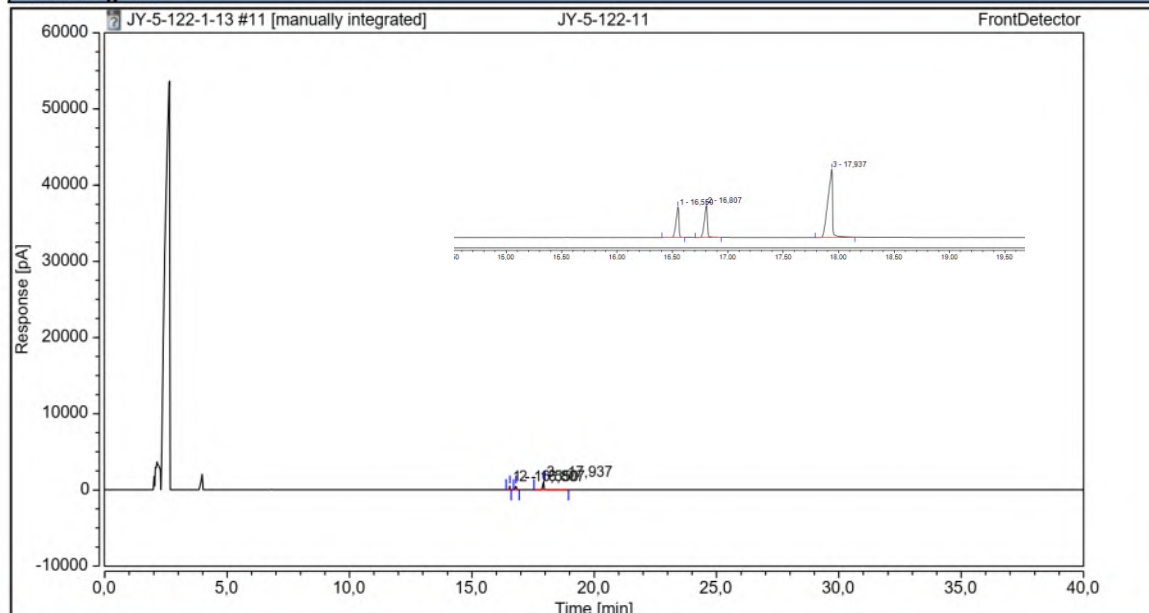

### Integration Results

| No.    | Peak Name   | Retention Time<br>min | Area<br>pA*min | Height<br>pA | Relative Area<br>% | Relative Height<br>% | Amount |
|--------|-------------|-----------------------|----------------|--------------|--------------------|----------------------|--------|
| n.a.   | Component 2 | n.a.                  | n.a.           | n.a.         | n.a.               | n.a.                 | n.a.   |
| n.a.   | Component 3 | n.a.                  | n.a.           | n.a.         | n.a.               | n.a.                 | n.a.   |
| 1      |             | 16,550                | 14,635         | 489,660      | 16,92              | 23,31                | n.a.   |
| 2      |             | 16,807                | 16,094         | 513,243      | 18,61              | 24,43                | n.a.   |
| n.a.   | Component 4 | n.a.                  | n.a.           | n.a.         | n.a.               | n.a.                 | n.a.   |
| 3      |             | 17,937                | 55,742         | 1097,985     | 64,46              | 52,26                | n.a.   |
| n.a.   | Component 5 | n.a.                  | n.a.           | n.a.         | n.a.               | n.a.                 | n.a.   |
| Total: |             |                       | 86,472         | 2100,888     | 100,00             | 100,00               |        |

File :D:\MSDCHEM\1\DATA\2001\JY-5-122-11.D  
Operator :  
Acquired : 9 Jan 2020 21:36 using AcqMethod SK3-30X.M  
Instrument : GC-MSD  
Sample Name: JY-5-122-11  
Misc Info :  
Vial Number: 46

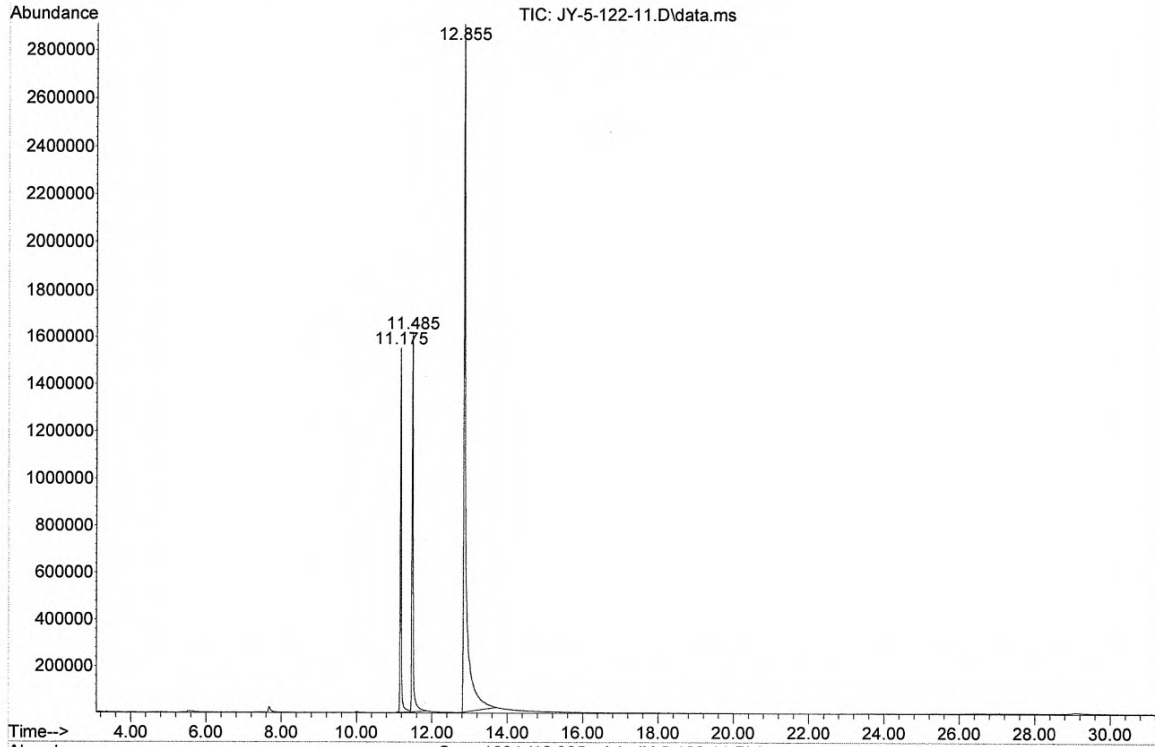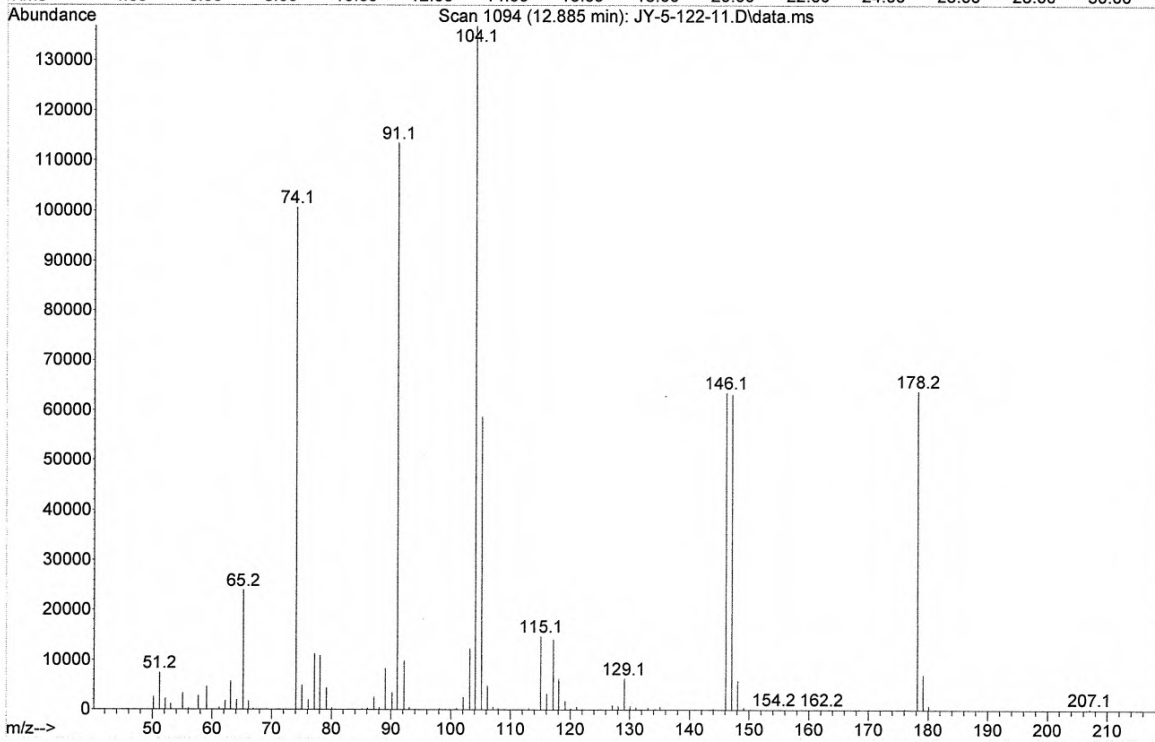

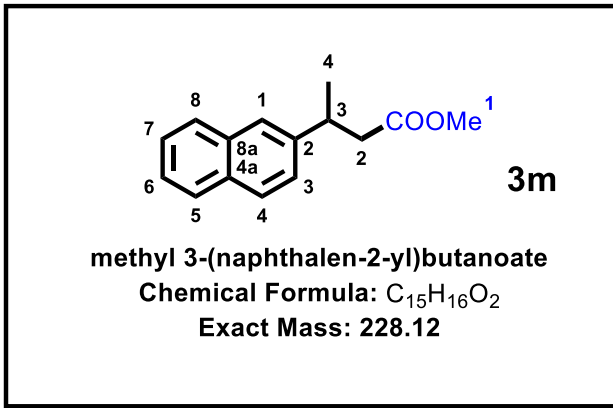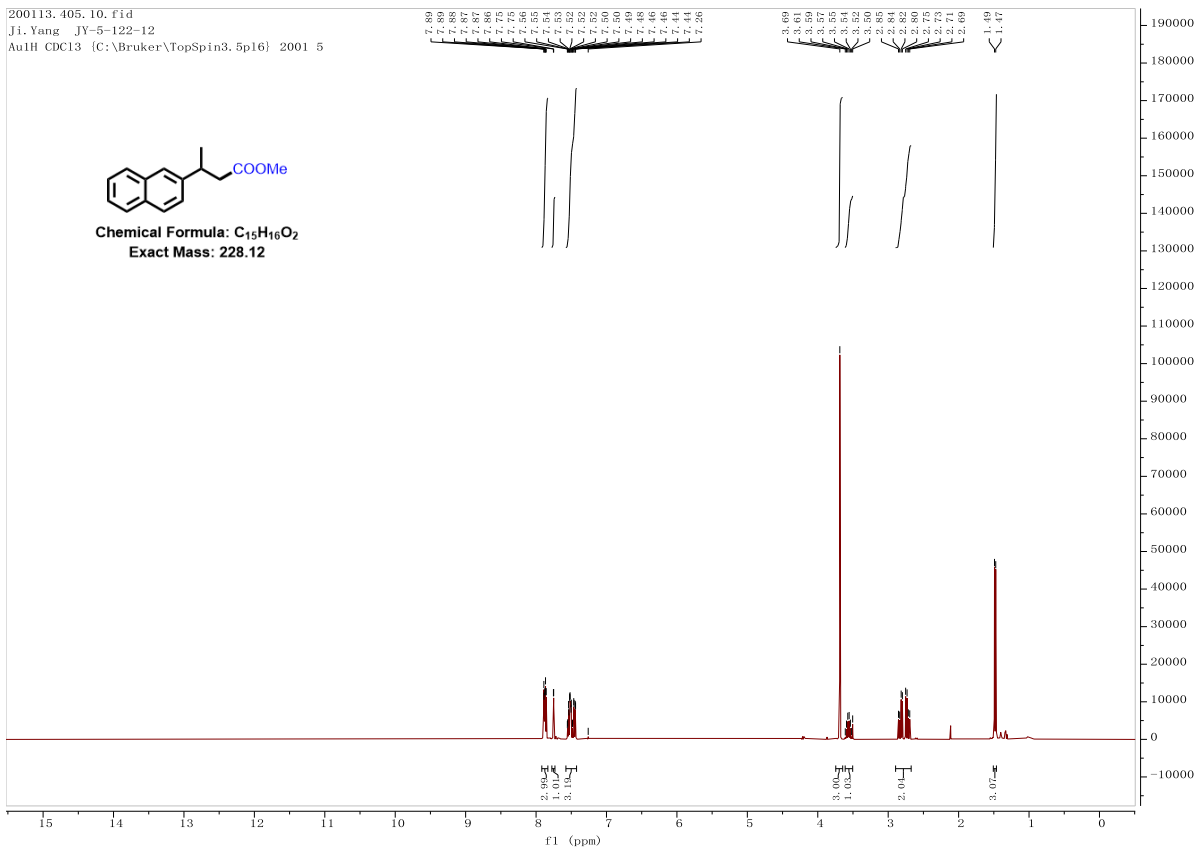

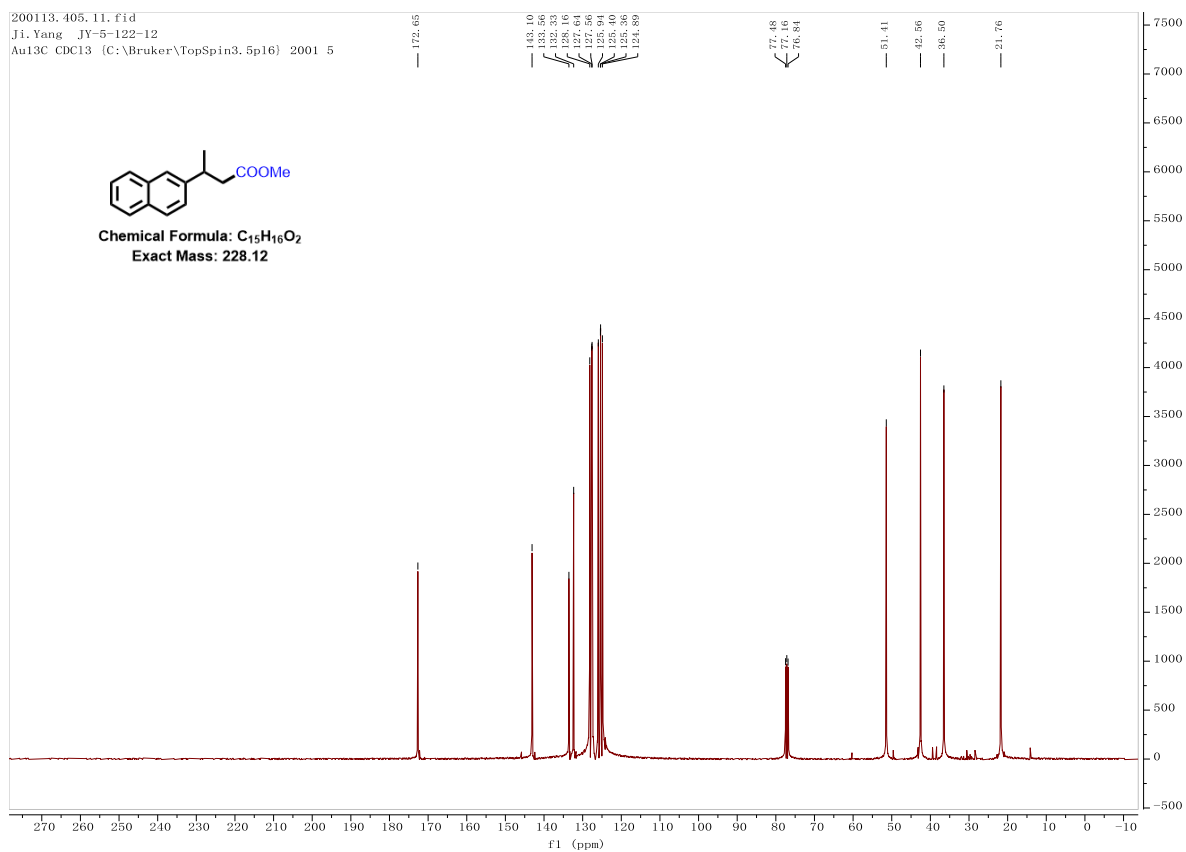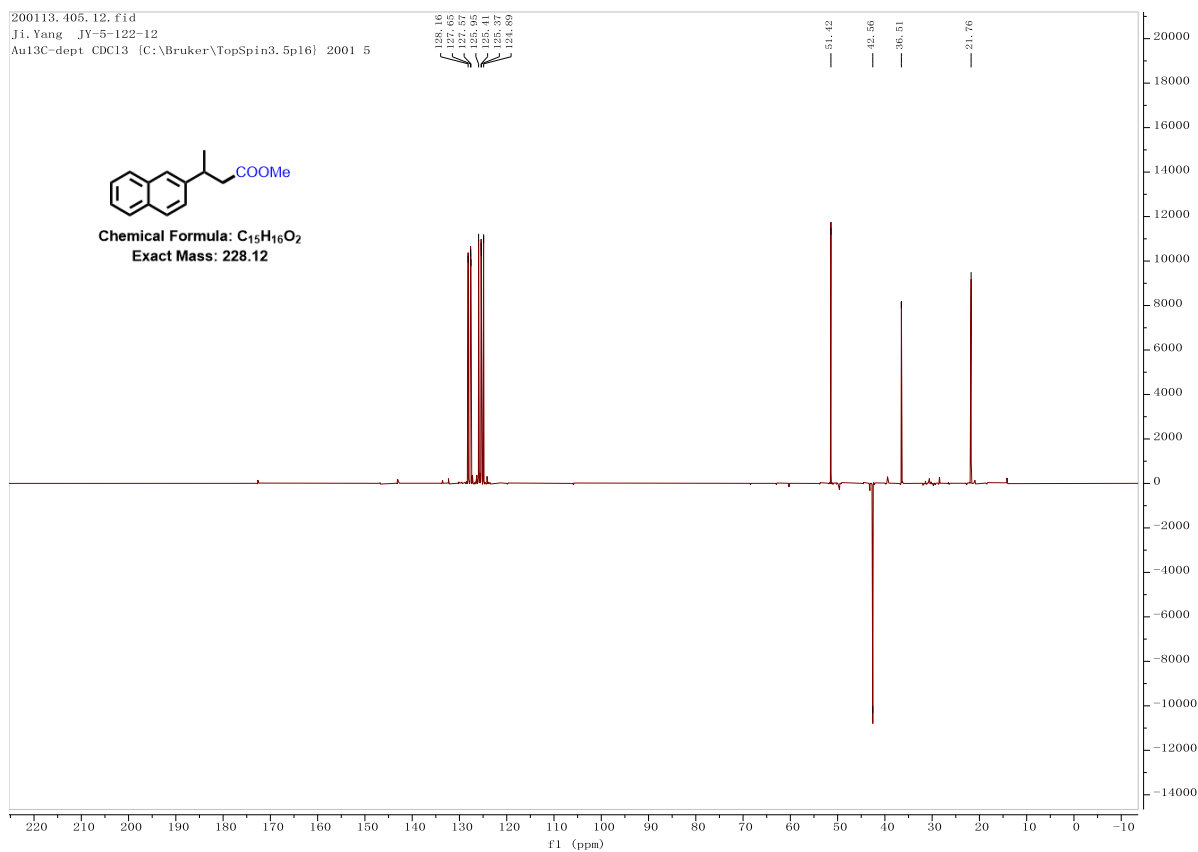

### Chromatogram and Results

| Injection Details    |                 |                   |               |
|----------------------|-----------------|-------------------|---------------|
| Injection Name:      | JY-5-122-12     | Run Time (min):   | 40,00         |
| Vial Number:         | 72              | Injection Volume: | 2,00          |
| Injection Type:      | Unknown         | Channel:          | FrontDetector |
| Calibration Level:   |                 | Wavelength:       | n.a.          |
| Instrument Method:   | dong-40min      | Bandwidth:        | n.a.          |
| Processing Method:   | dong            | Dilution Factor:  | 1,0000        |
| Injection Date/Time: | 10.Jan.20 02:40 | Sample Weight:    | 1,0000        |

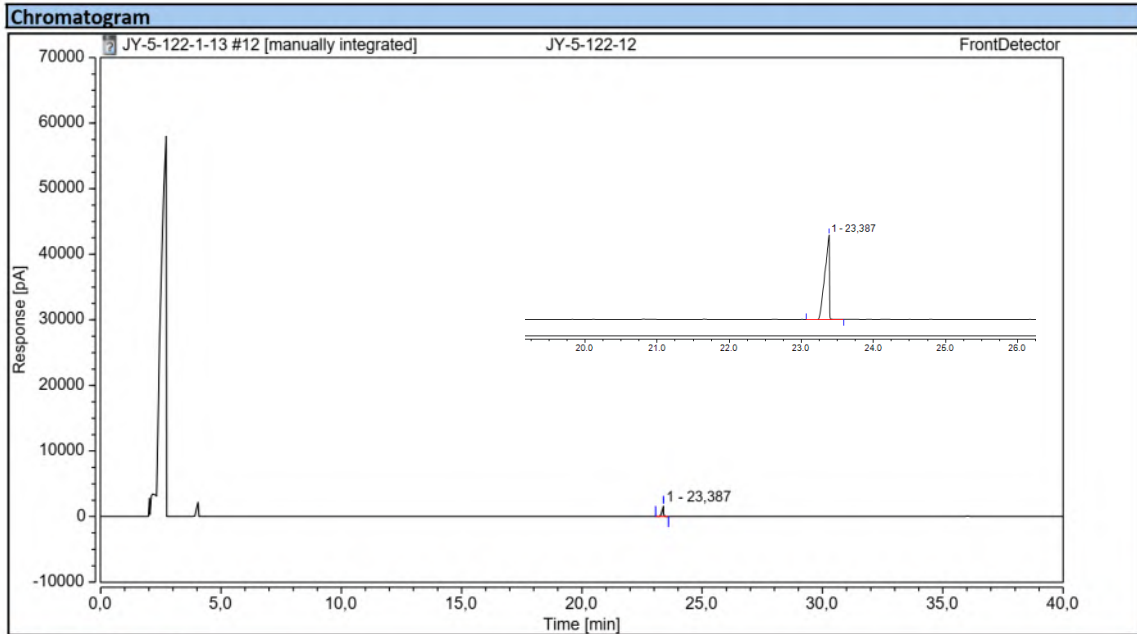

| Integration Results |             |                       |                |              |                    |                      |        |
|---------------------|-------------|-----------------------|----------------|--------------|--------------------|----------------------|--------|
| No.                 | Peak Name   | Retention Time<br>min | Area<br>pA*min | Height<br>pA | Relative Area<br>% | Relative Height<br>% | Amount |
| n.a.                | Component 2 | n.a.                  | n.a.           | n.a.         | n.a.               | n.a.                 | n.a.   |
| n.a.                | Component 3 | n.a.                  | n.a.           | n.a.         | n.a.               | n.a.                 | n.a.   |
| n.a.                | Component 4 | n.a.                  | n.a.           | n.a.         | n.a.               | n.a.                 | n.a.   |
| n.a.                | Component 5 | n.a.                  | n.a.           | n.a.         | n.a.               | n.a.                 | n.a.   |
| 1                   |             | 23,387                | 112,198        | 1546,722     | 100,00             | 100,00               | n.a.   |
| Total:              |             |                       | 112,198        | 1546,722     | 100,00             | 100,00               |        |



File :D:\MSDCHEM\1\DATA\2001\JY-5-122-12.D  
Operator :  
Acquired : 9 Jan 2020 22:15 using AcqMethod SK3-30X.M  
Instrument : GC-MSD  
Sample Name: JY-5-122-12  
Misc Info :  
Vial Number: 47

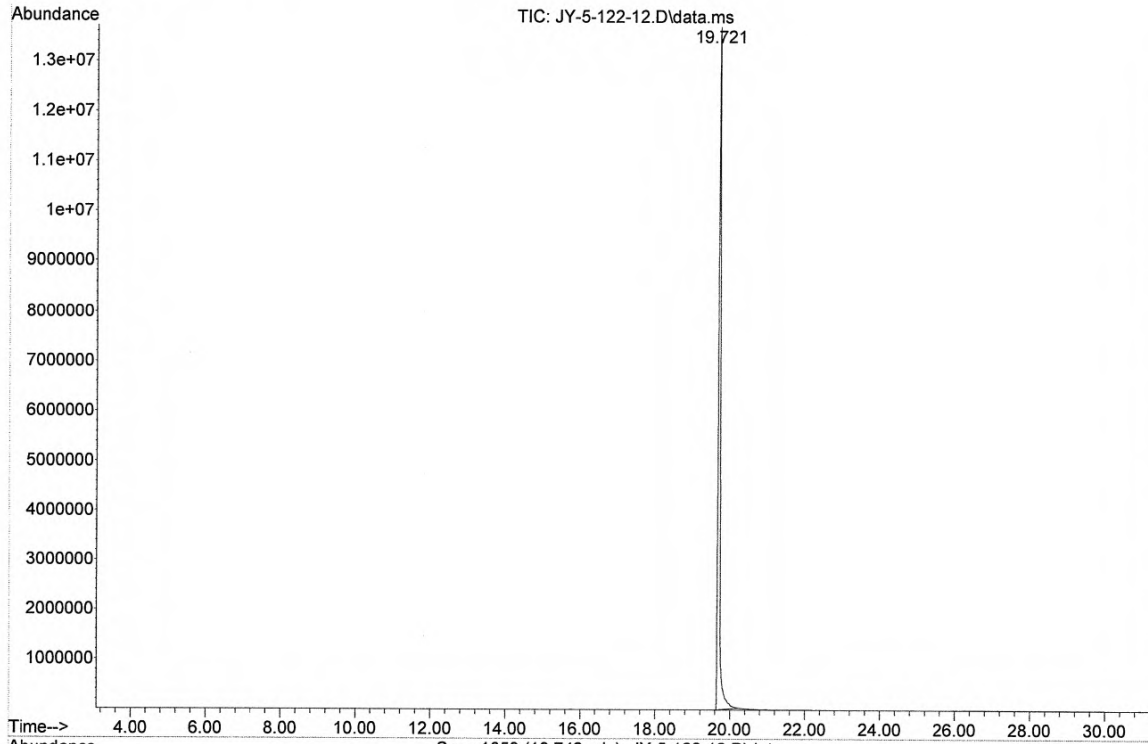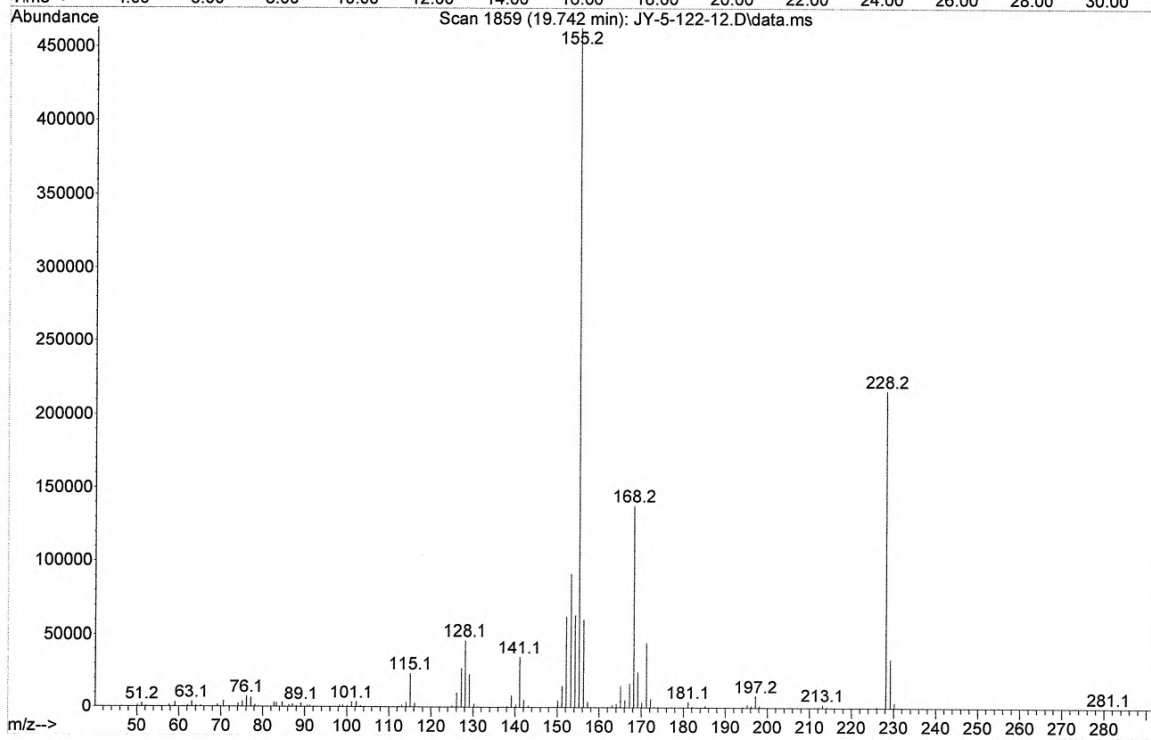

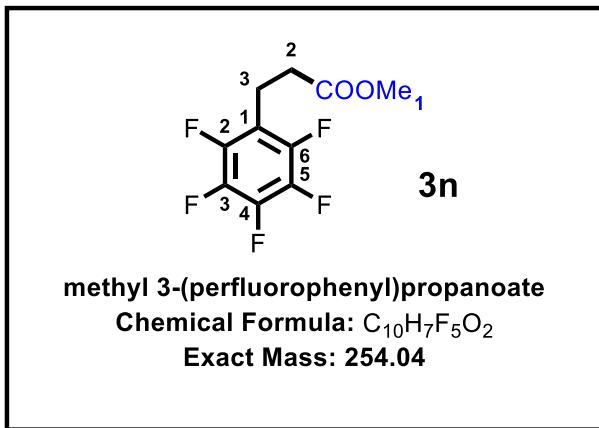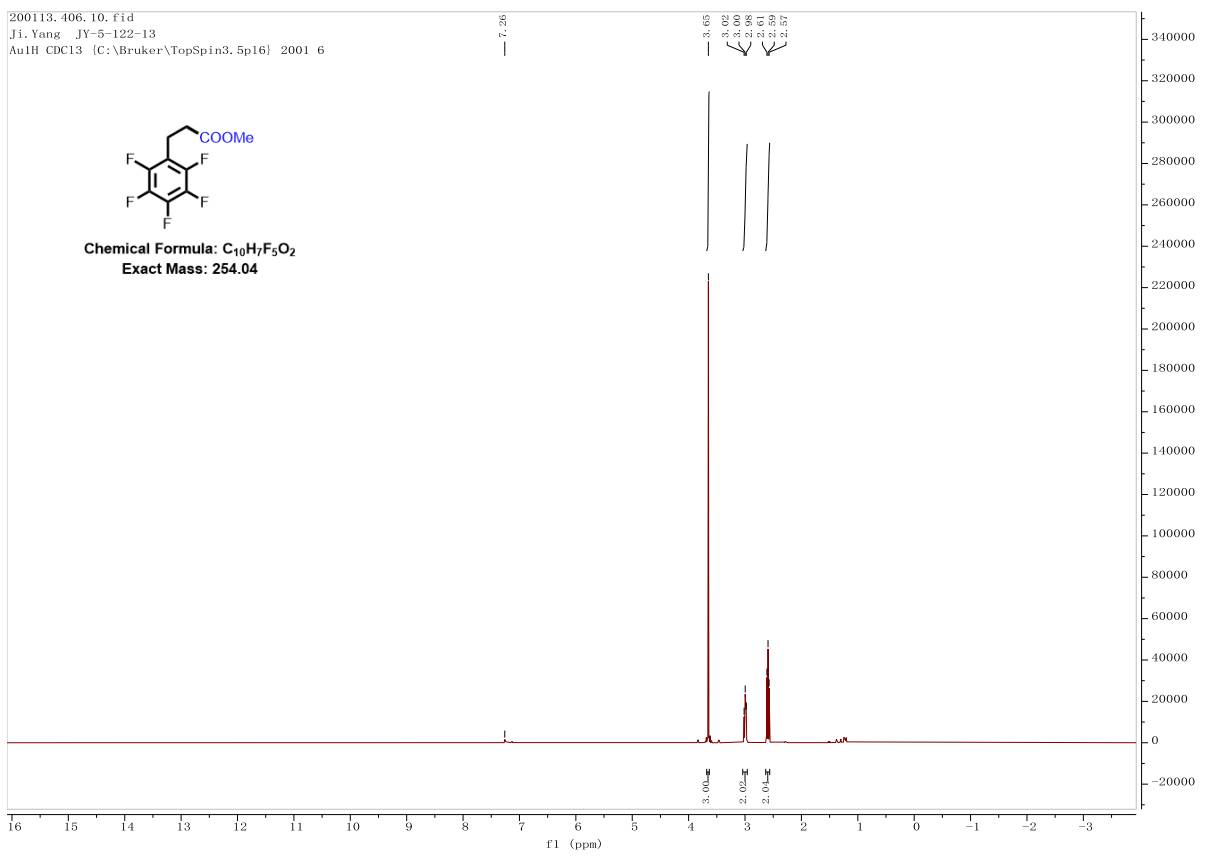

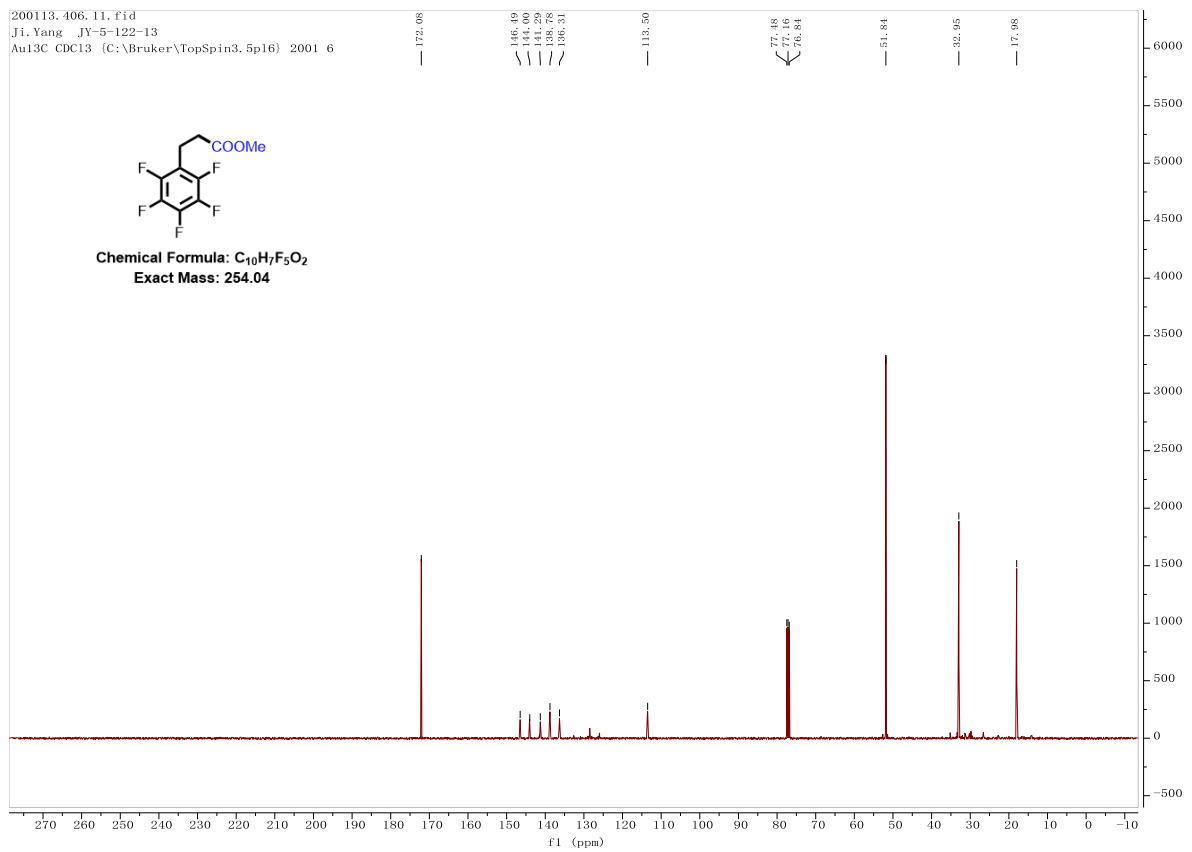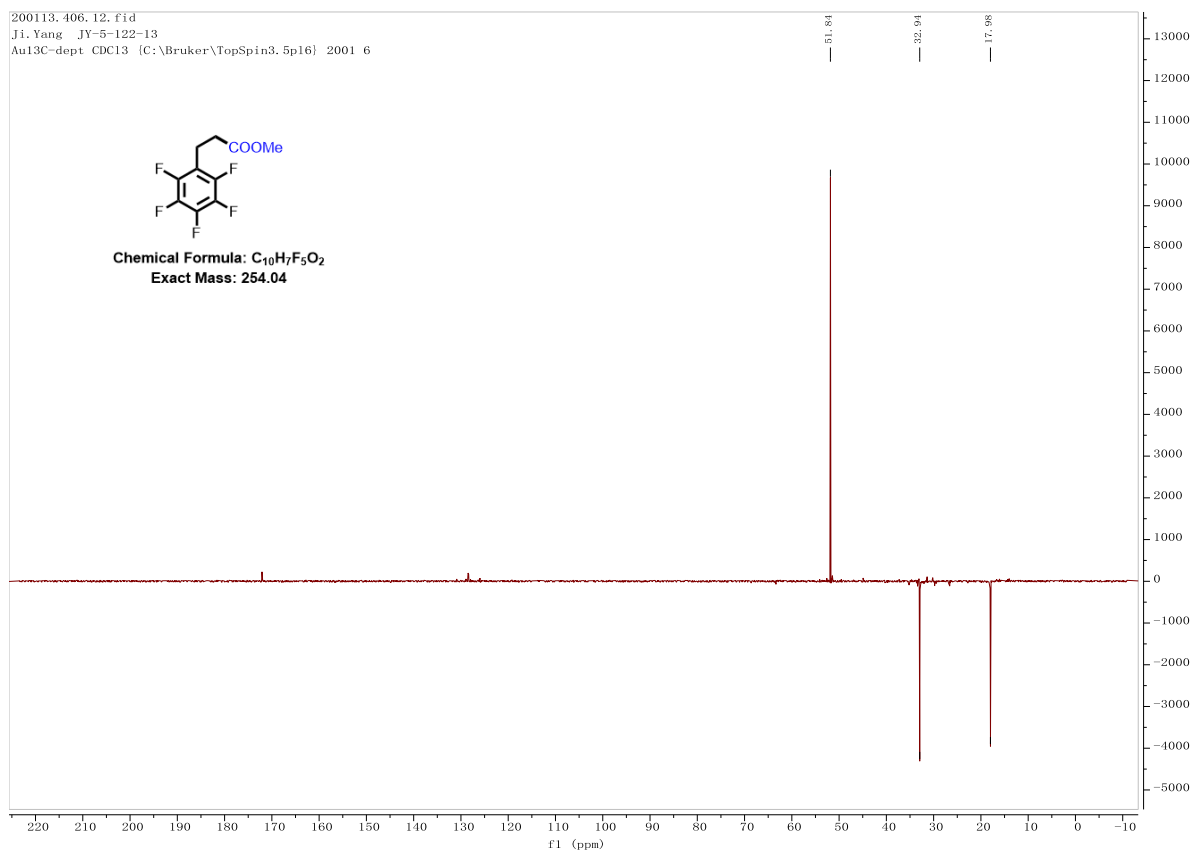

## Chromatogram and Results

### Injection Details

|                      |                 |                   |               |
|----------------------|-----------------|-------------------|---------------|
| Injection Name:      | JY-5-122-13     | Run Time (min):   | 40,00         |
| Vial Number:         | 73              | Injection Volume: | 2,00          |
| Injection Type:      | Unknown         | Channel:          | FrontDetector |
| Calibration Level:   |                 | Wavelength:       | n.a.          |
| Instrument Method:   | dong-40min      | Bandwidth:        | n.a.          |
| Processing Method:   | dong            | Dilution Factor:  | 1,0000        |
| Injection Date/Time: | 10.Jan.20 03:41 | Sample Weight:    | 1,0000        |

### Chromatogram

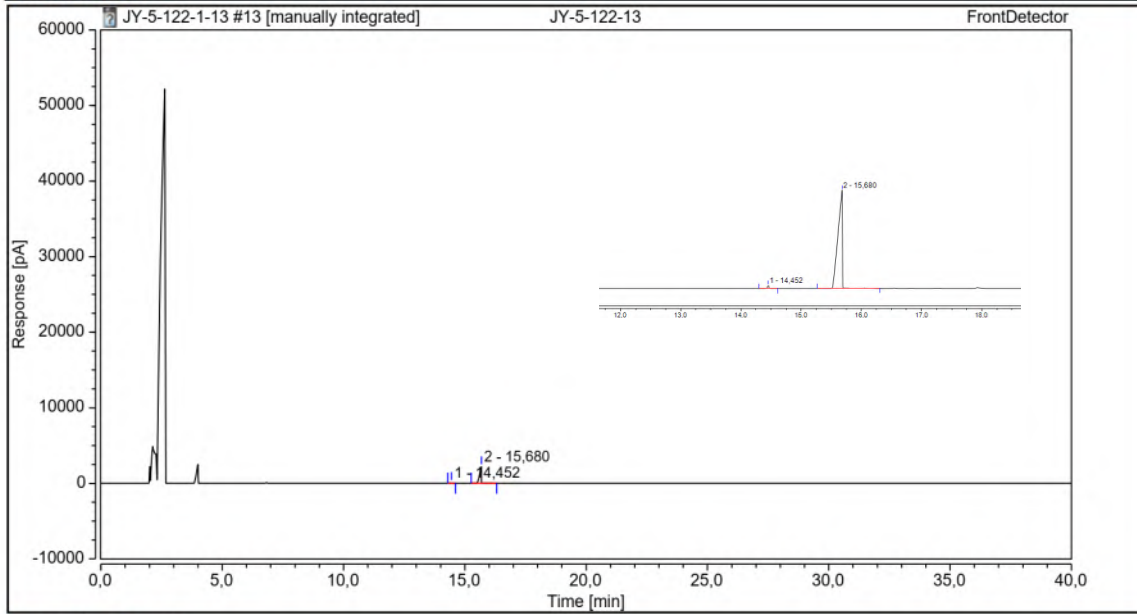

### Integration Results

| No.           | Peak Name   | Retention Time<br>min | Area<br>pA*min | Height<br>pA    | Relative Area<br>% | Relative Height<br>% | Amount |
|---------------|-------------|-----------------------|----------------|-----------------|--------------------|----------------------|--------|
| n.a.          | Component 2 | n.a.                  | n.a.           | n.a.            | n.a.               | n.a.                 | n.a.   |
| n.a.          | Component 3 | n.a.                  | n.a.           | n.a.            | n.a.               | n.a.                 | n.a.   |
| 1             |             | 14,452                | 1,676          | 66,785          | 0,91               | 2,98                 | n.a.   |
| 2             |             | 15,680                | 181,537        | 2172,601        | 99,09              | 97,02                | n.a.   |
| n.a.          | Component 4 | n.a.                  | n.a.           | n.a.            | n.a.               | n.a.                 | n.a.   |
| n.a.          | Component 5 | n.a.                  | n.a.           | n.a.            | n.a.               | n.a.                 | n.a.   |
| <b>Total:</b> |             |                       | <b>183,214</b> | <b>2239,387</b> | <b>100,00</b>      | <b>100,00</b>        |        |

File :D:\MSDChem\1\DATA\2001\JY-5-122-13.D  
Operator :  
Acquired : 9 Jan 2020 22:54 using AcqMethod SK3-30X.M  
Instrument : GC-MSD  
Sample Name: JY-5-122-13  
Misc Info :  
Vial Number: 48

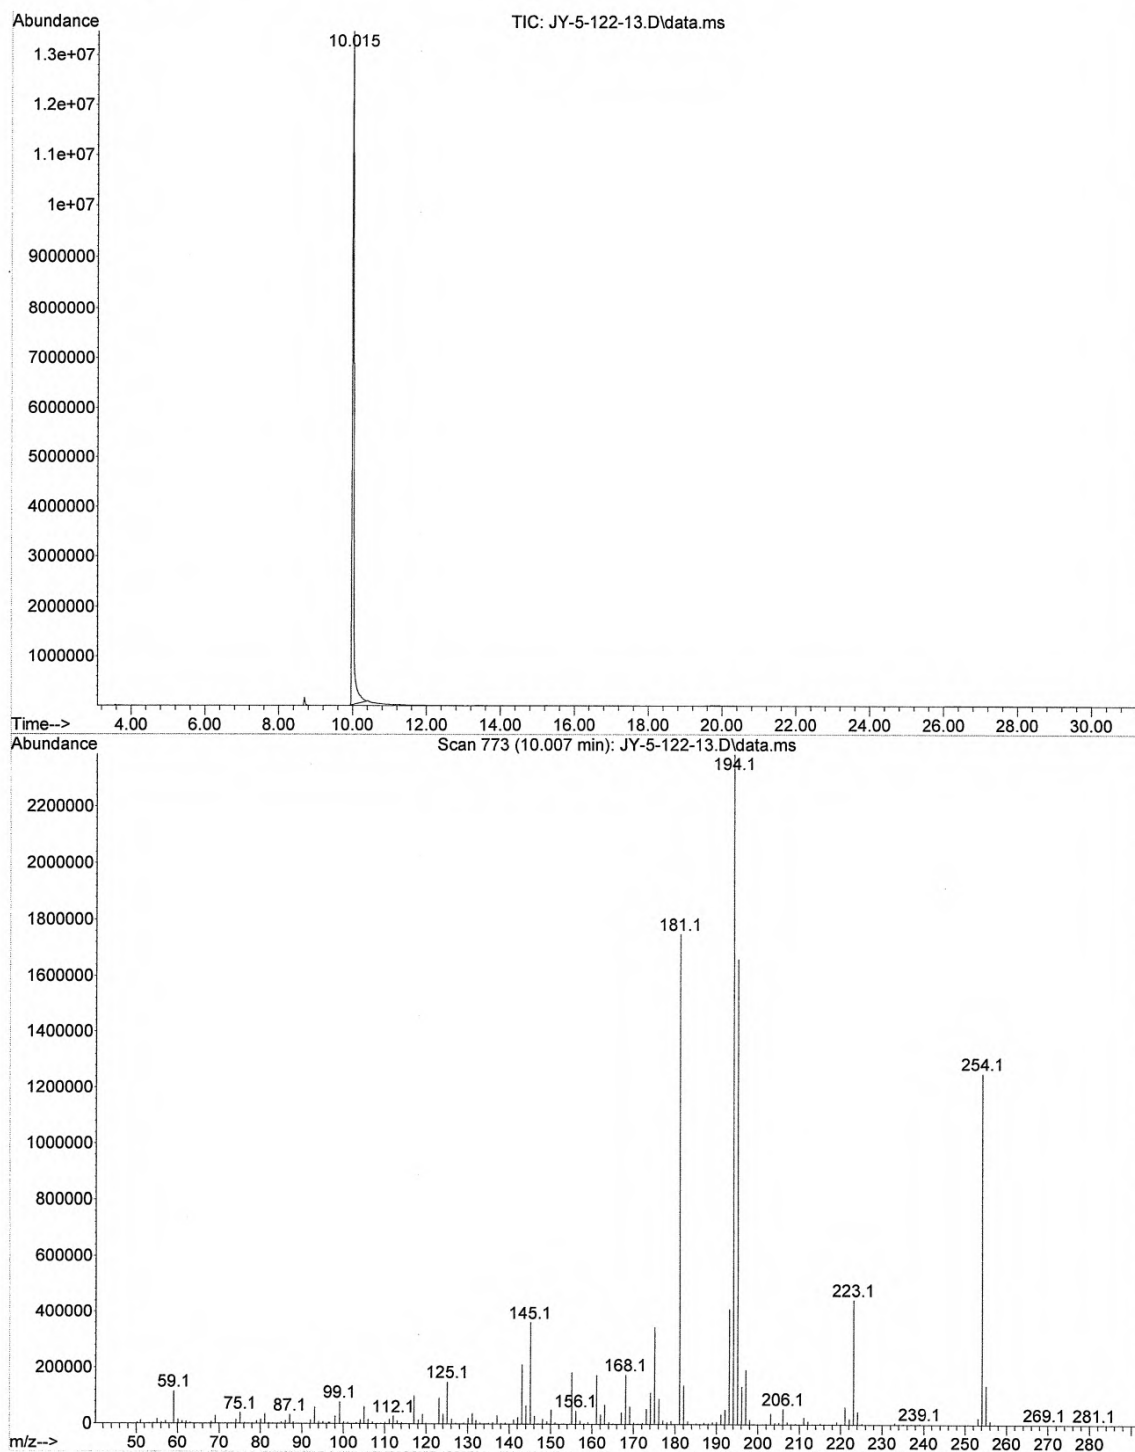

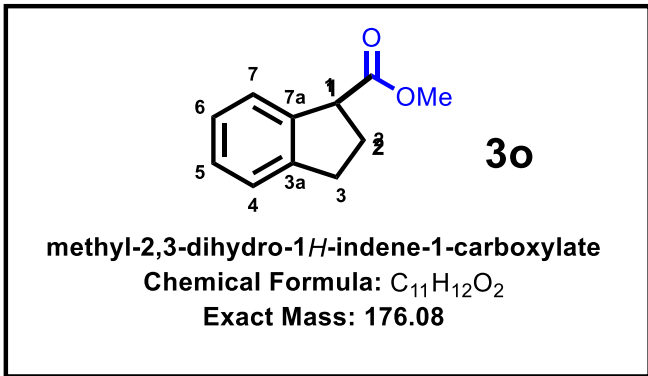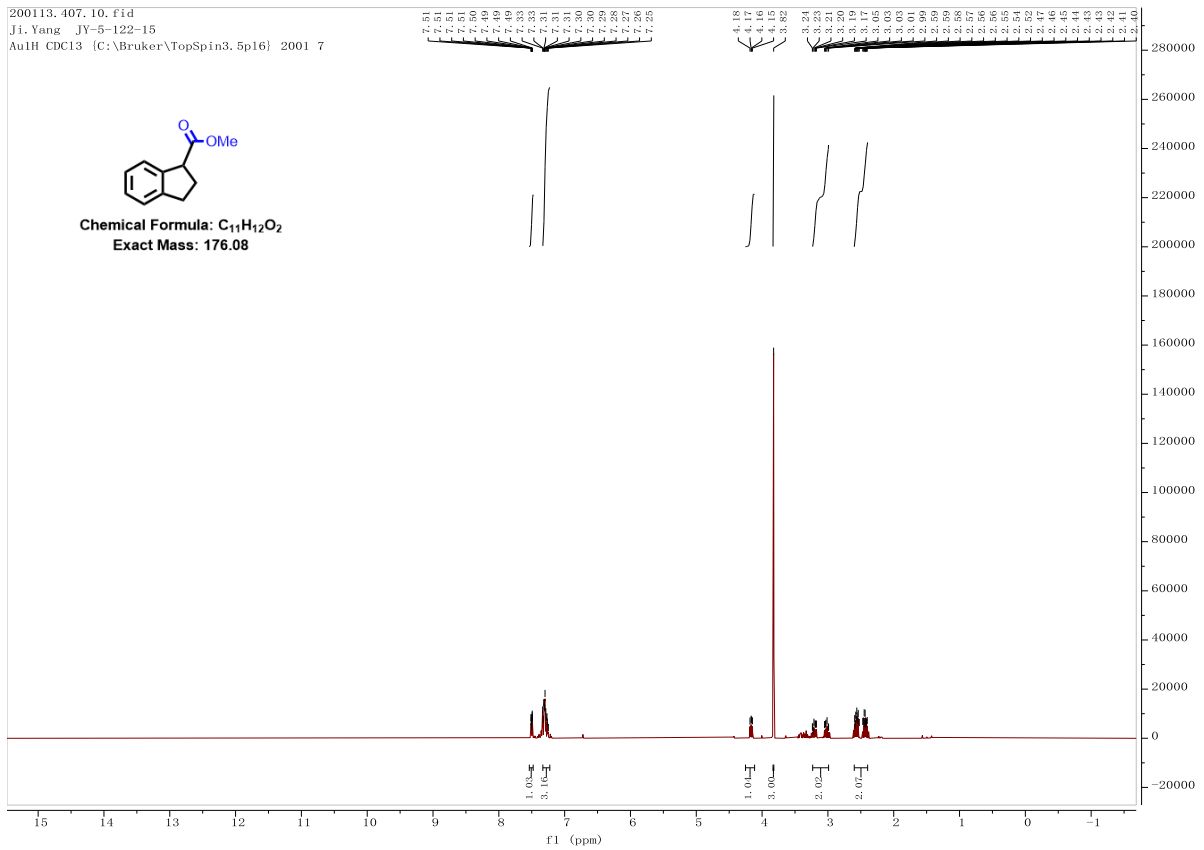

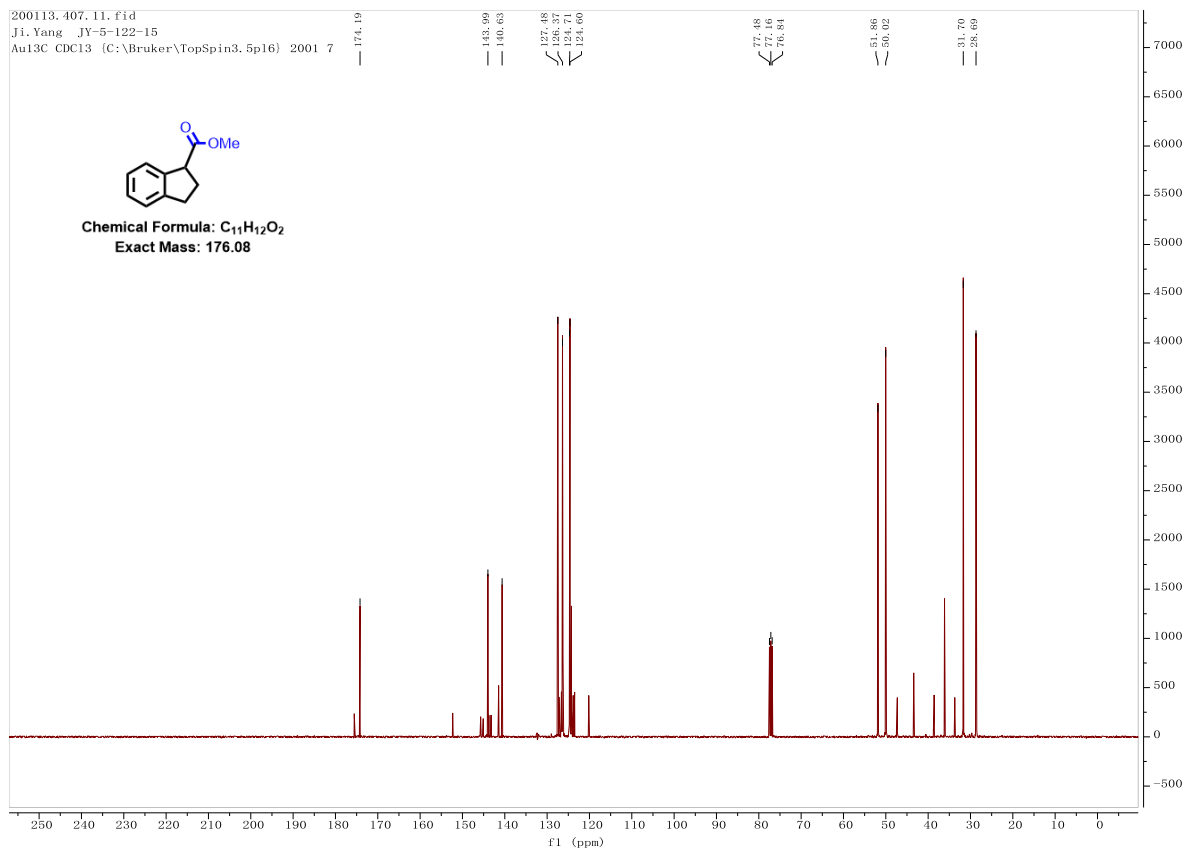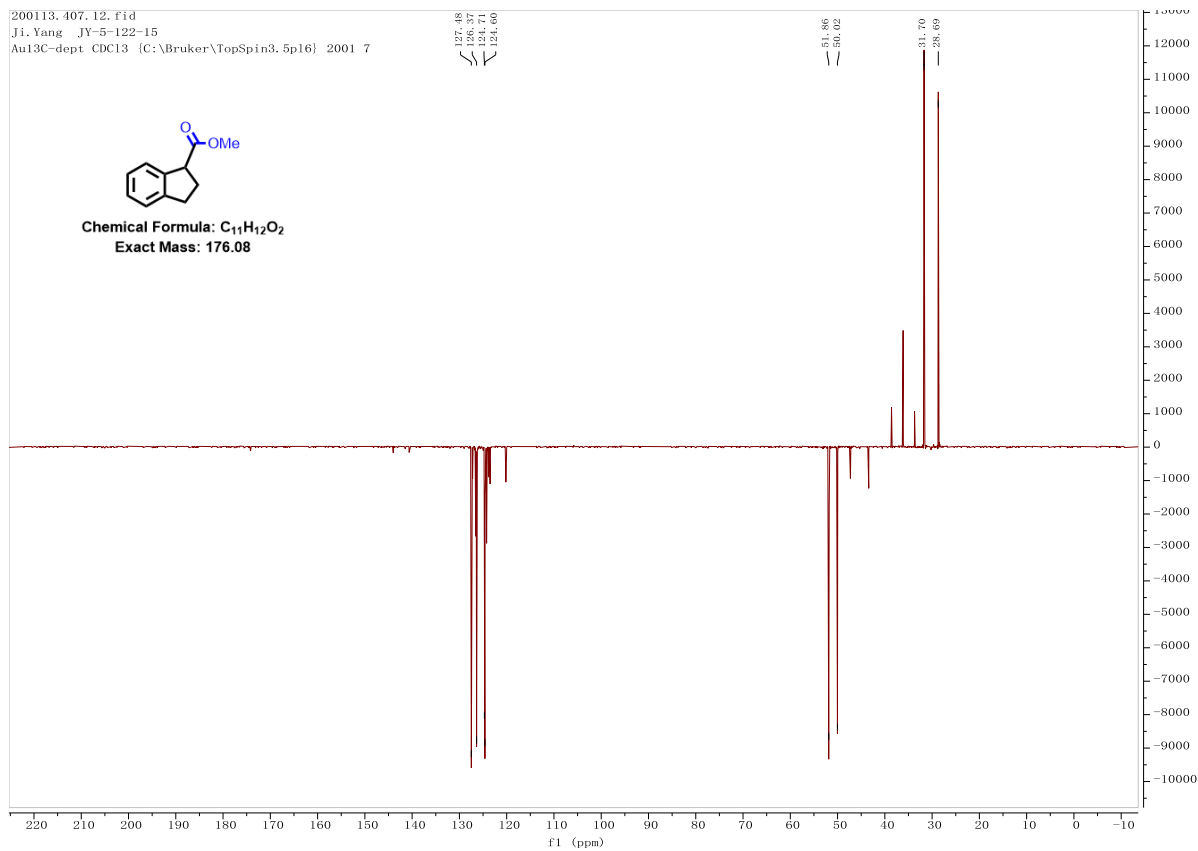

## Chromatogram and Results

### Injection Details

|                      |                  |                   |               |
|----------------------|------------------|-------------------|---------------|
| Injection Name:      | JY-5-122-14-26-2 | Run Time (min):   | 40,00         |
| Vial Number:         | 112              | Injection Volume: | 2,00          |
| Injection Type:      | Unknown          | Channel:          | FrontDetector |
| Calibration Level:   |                  | Wavelength:       | n.a.          |
| Instrument Method:   | dong-40min       | Bandwidth:        | n.a.          |
| Processing Method:   | dong             | Dilution Factor:  | 1,0000        |
| Injection Date/Time: | 10.Jan.20 07:47  | Sample Weight:    | 1,0000        |

### Chromatogram

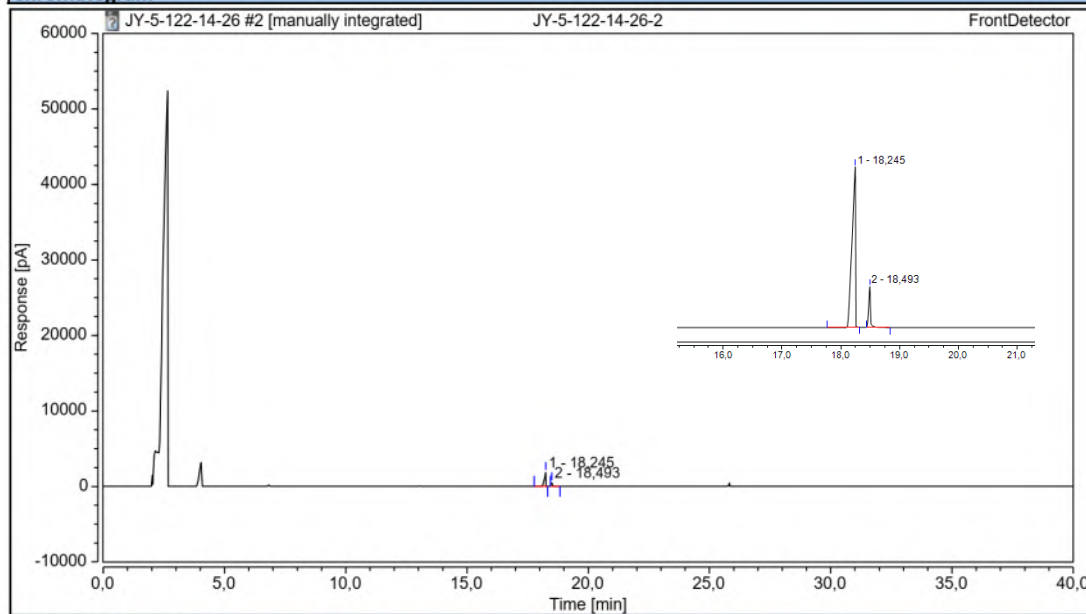

### Integration Results

| No.           | Peak Name   | Retention Time<br>min | Area<br>pA*min | Height<br>pA    | Relative Area<br>% | Relative Height<br>% | Amount |
|---------------|-------------|-----------------------|----------------|-----------------|--------------------|----------------------|--------|
| n.a.          | Component 2 | n.a.                  | n.a.           | n.a.            | n.a.               | n.a.                 | n.a.   |
| n.a.          | Component 3 | n.a.                  | n.a.           | n.a.            | n.a.               | n.a.                 | n.a.   |
| n.a.          | Component 4 | n.a.                  | n.a.           | n.a.            | n.a.               | n.a.                 | n.a.   |
| 1             |             | 18,245                | 121,600        | 1824,910        | 88,49              | 79,75                | n.a.   |
| 2             |             | 18,493                | 15,824         | 463,334         | 11,51              | 20,25                | n.a.   |
| n.a.          | Component 5 | n.a.                  | n.a.           | n.a.            | n.a.               | n.a.                 | n.a.   |
| <b>Total:</b> |             |                       | <b>137,424</b> | <b>2288,244</b> | <b>100,00</b>      | <b>100,00</b>        |        |



File :D:\MSDChem\1\DATA\2001\JY-5-122-15.D  
Operator :  
Acquired : 10 Jan 2020 10:38 using AcqMethod SK3-30X.M  
Instrument : GC-MSD  
Sample Name: JY-5-122-15  
Misc Info :  
Vial Number: 37

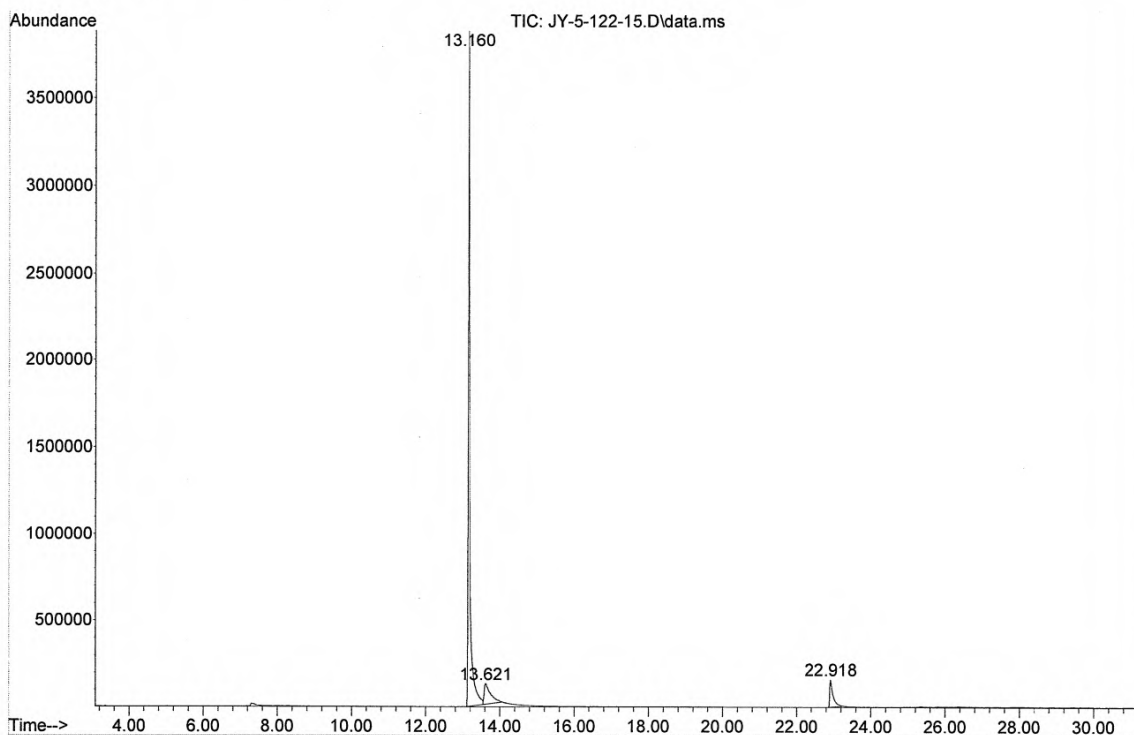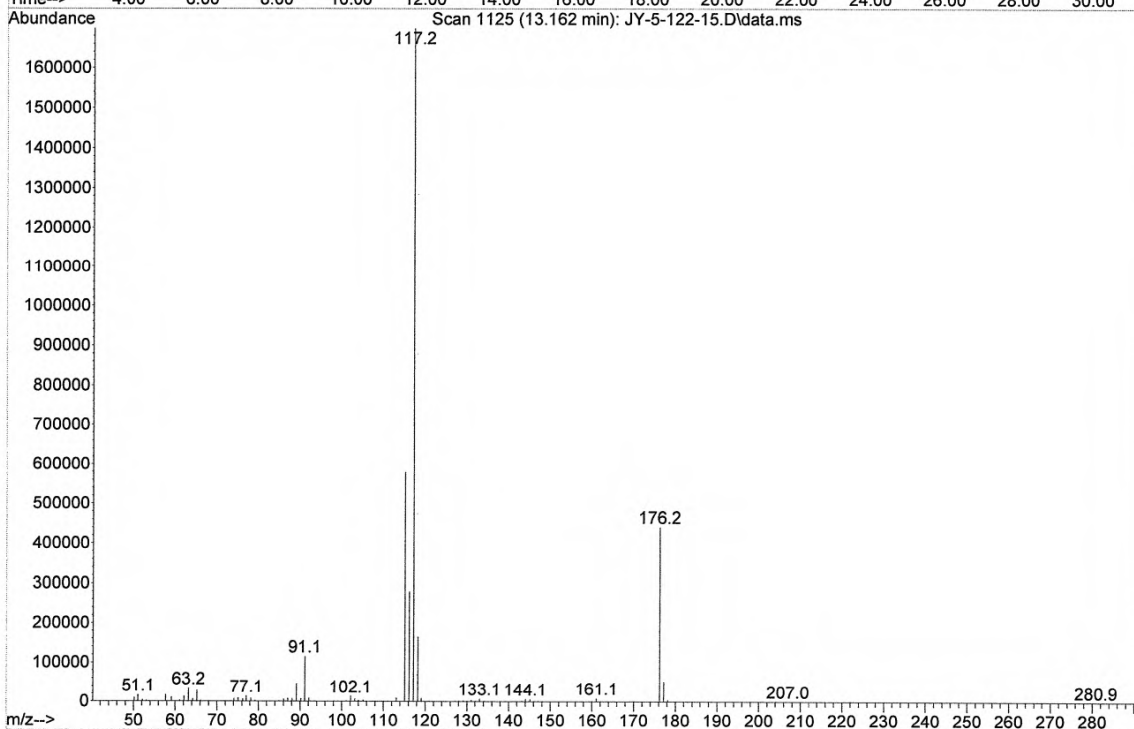

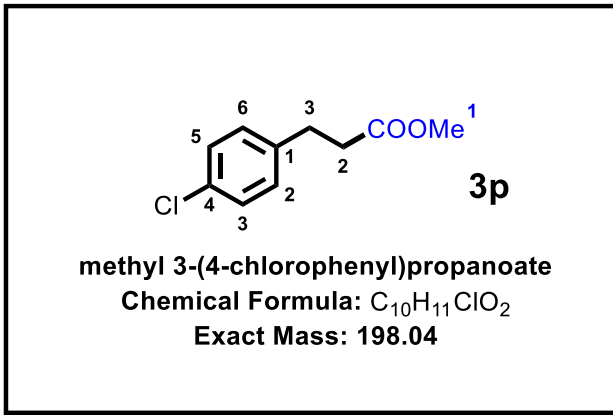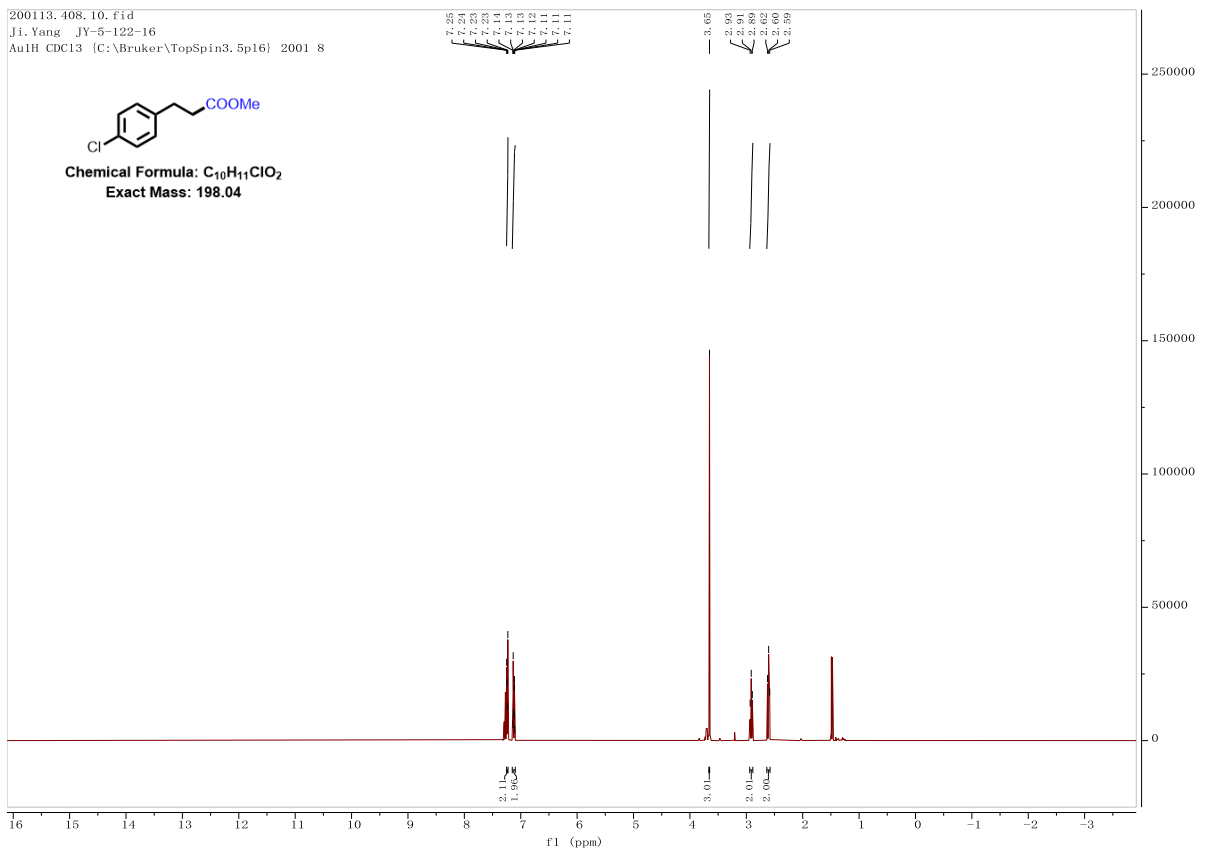

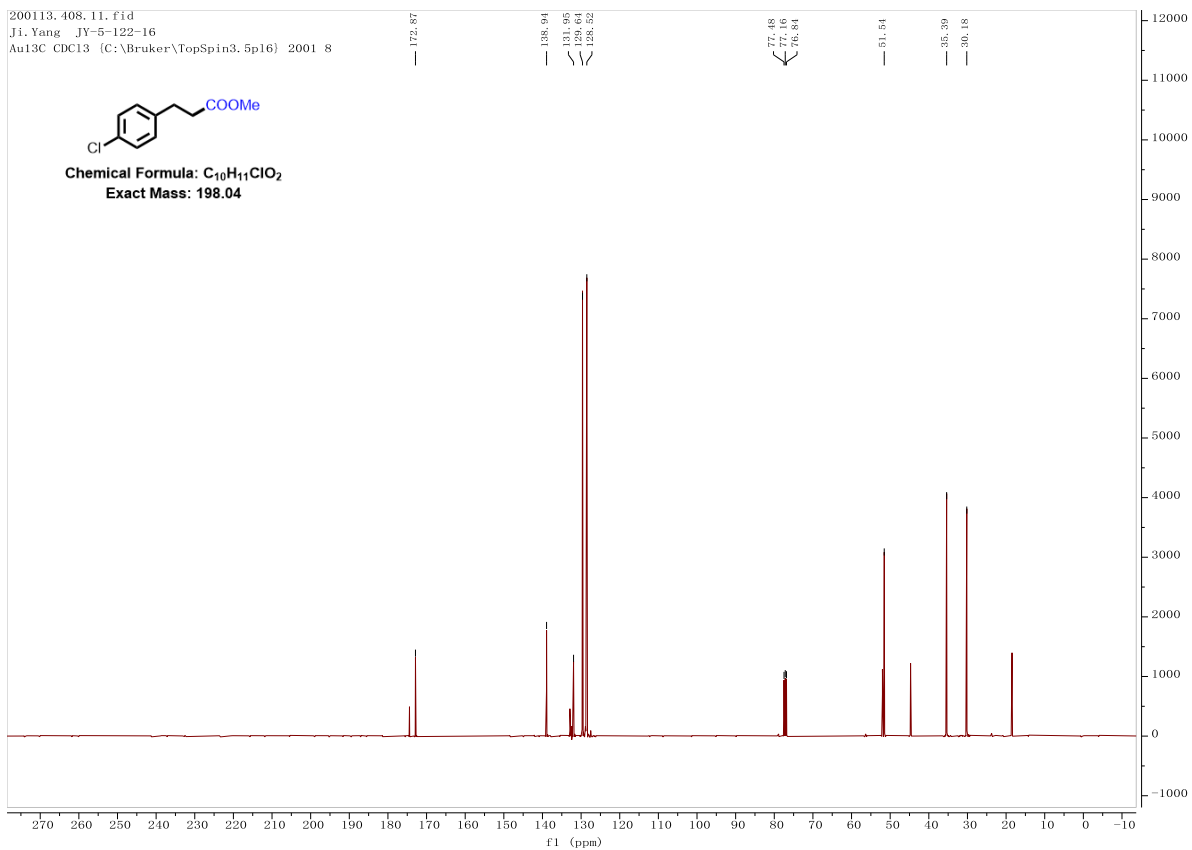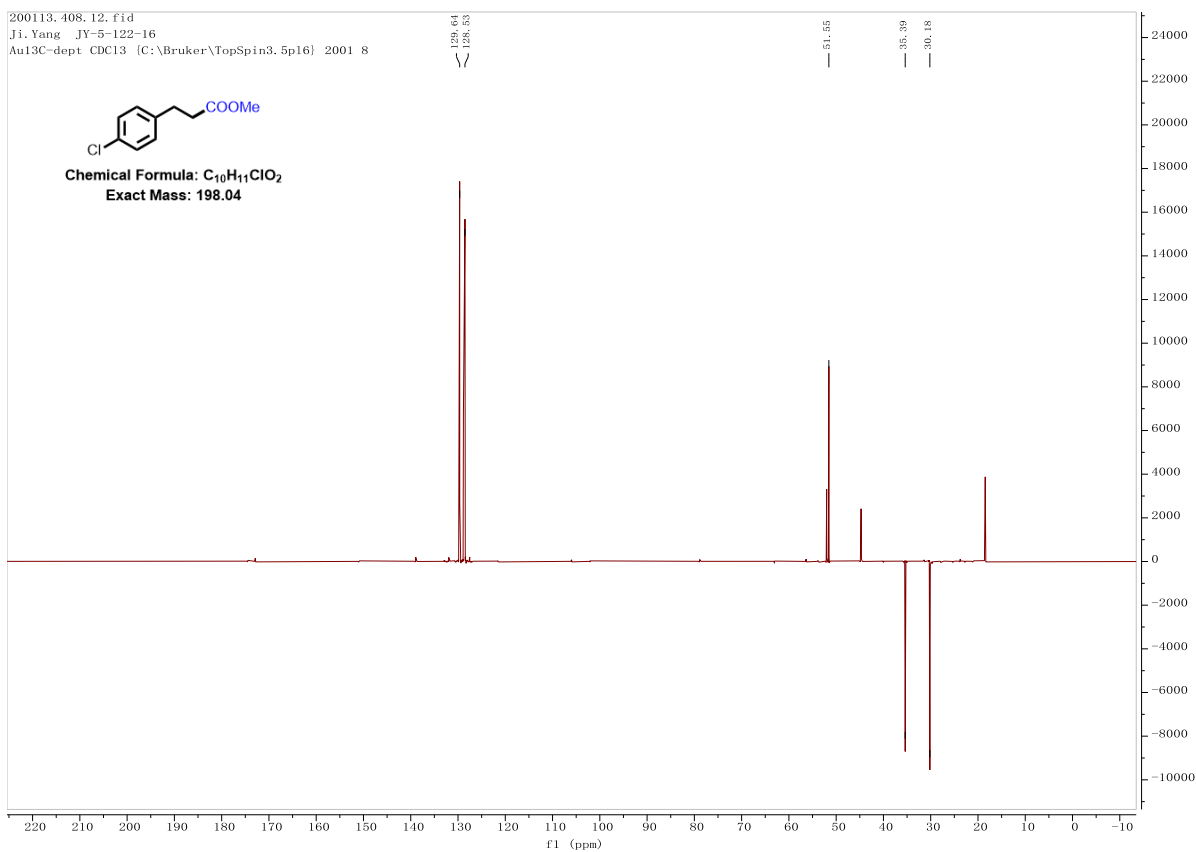

## Chromatogram and Results

### Injection Details

|                      |                  |                   |               |
|----------------------|------------------|-------------------|---------------|
| Injection Name:      | JY-5-122-14-26-3 | Run Time (min):   | 40,00         |
| Vial Number:         | 113              | Injection Volume: | 2,00          |
| Injection Type:      | Unknown          | Channel:          | FrontDetector |
| Calibration Level:   |                  | Wavelength:       | n.a.          |
| Instrument Method:   | dong-40min       | Bandwidth:        | n.a.          |
| Processing Method:   | dong             | Dilution Factor:  | 1,0000        |
| Injection Date/Time: | 10.Jan.20 08:48  | Sample Weight:    | 1,0000        |

### Chromatogram

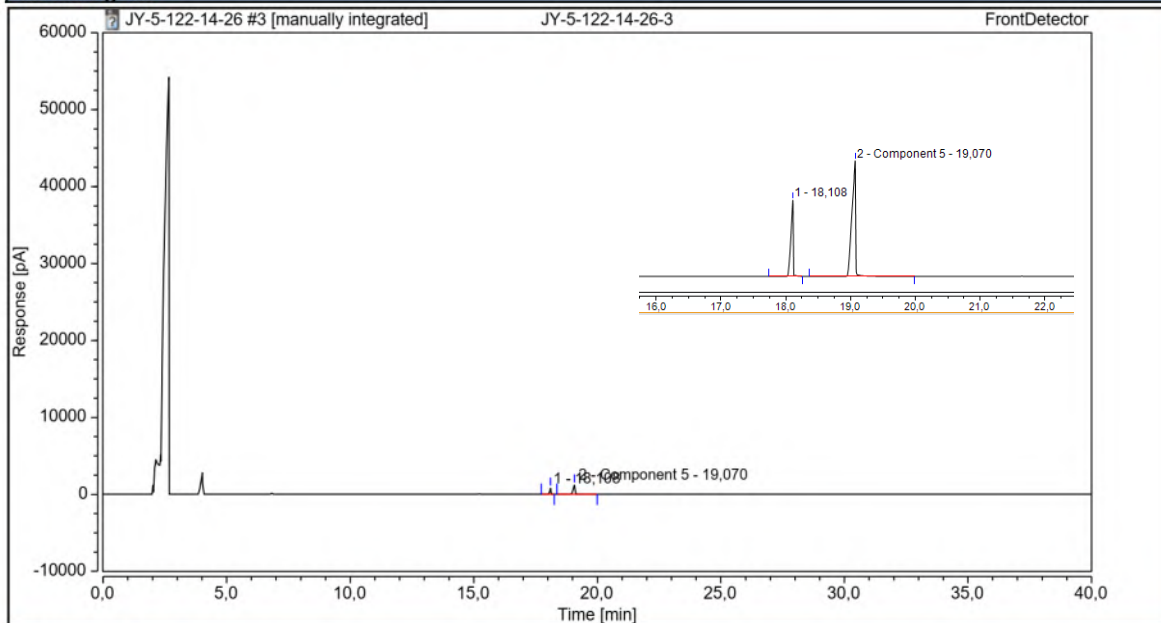

### Integration Results

| No.           | Peak Name   | Retention Time<br>min | Area<br>pA*min | Height<br>pA    | Relative Area<br>% | Relative Height<br>% | Amount |
|---------------|-------------|-----------------------|----------------|-----------------|--------------------|----------------------|--------|
| n.a.          | Component 2 | n.a.                  | n.a.           | n.a.            | n.a.               | n.a.                 | n.a.   |
| n.a.          | Component 3 | n.a.                  | n.a.           | n.a.            | n.a.               | n.a.                 | n.a.   |
| n.a.          | Component 4 | n.a.                  | n.a.           | n.a.            | n.a.               | n.a.                 | n.a.   |
| 1             |             | 18,108                | 32,949         | 786,789         | 28,98              | 39,72                | n.a.   |
| 2             | Component 5 | 19,070                | 80,751         | 1193,904        | 71,02              | 60,28                | n.a.   |
| <b>Total:</b> |             |                       | <b>113,699</b> | <b>1980,692</b> | <b>100,00</b>      | <b>100,00</b>        |        |

File :D:\MSDCHEM\1\DATA\2001\JY-5-122-16.D  
Operator :  
Acquired : 10 Jan 2020 11:55 using AcqMethod SK3-30X.M  
Instrument : GC-MSD  
Sample Name: JY-5-122-16  
Misc Info :  
Vial Number: 38

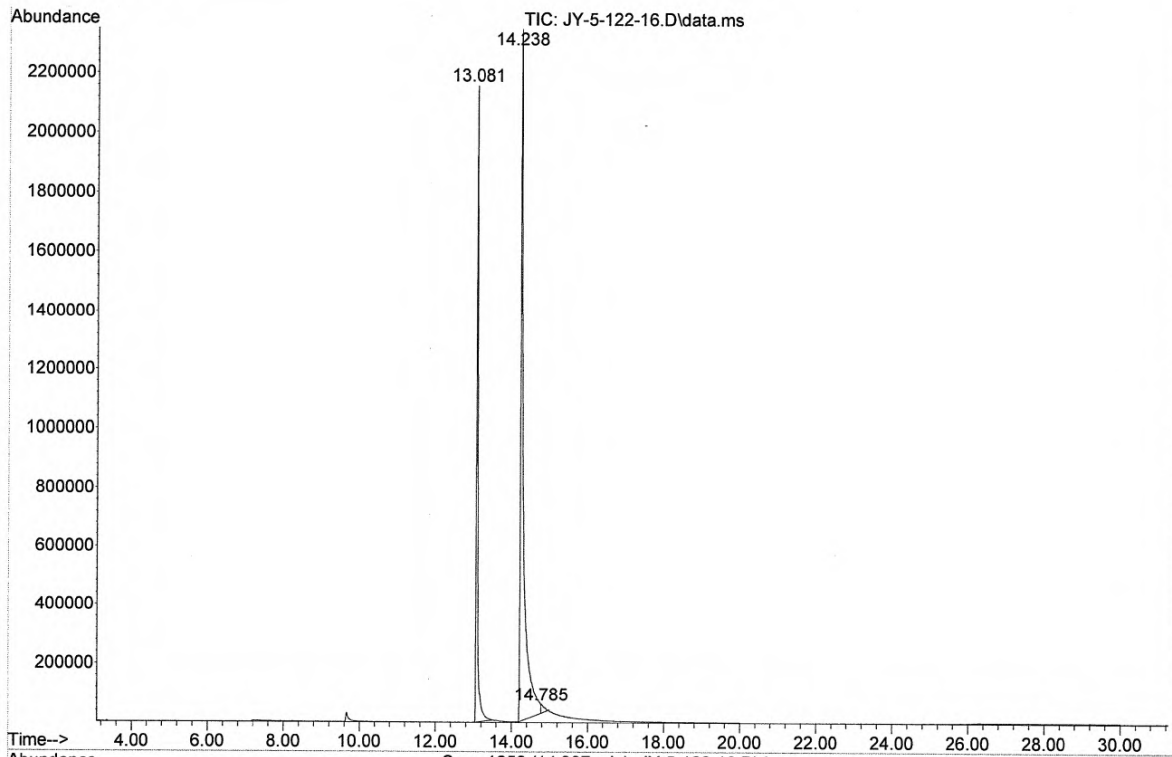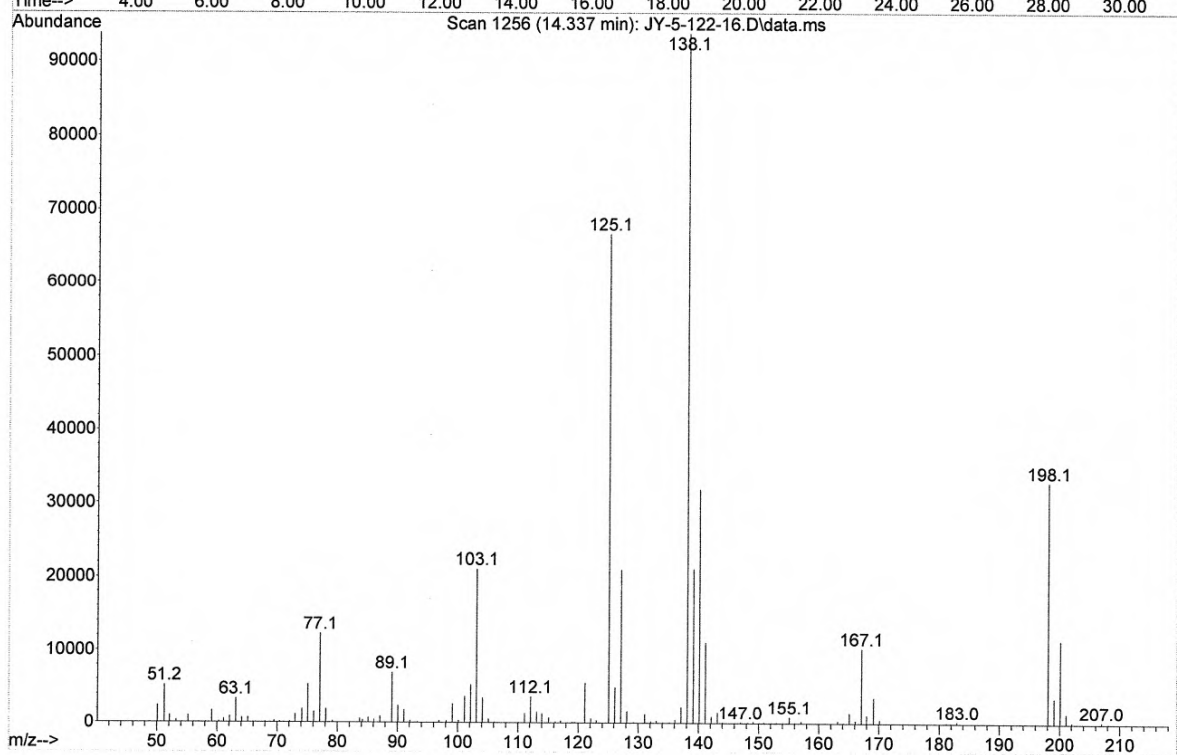

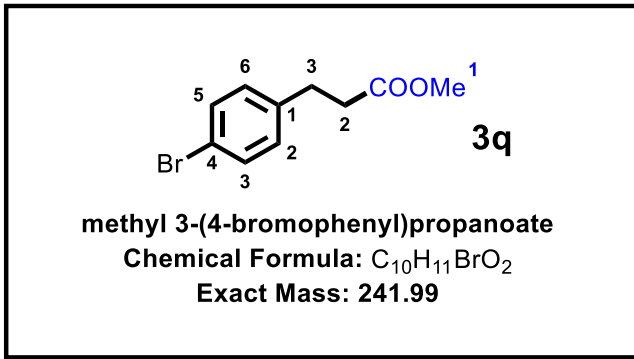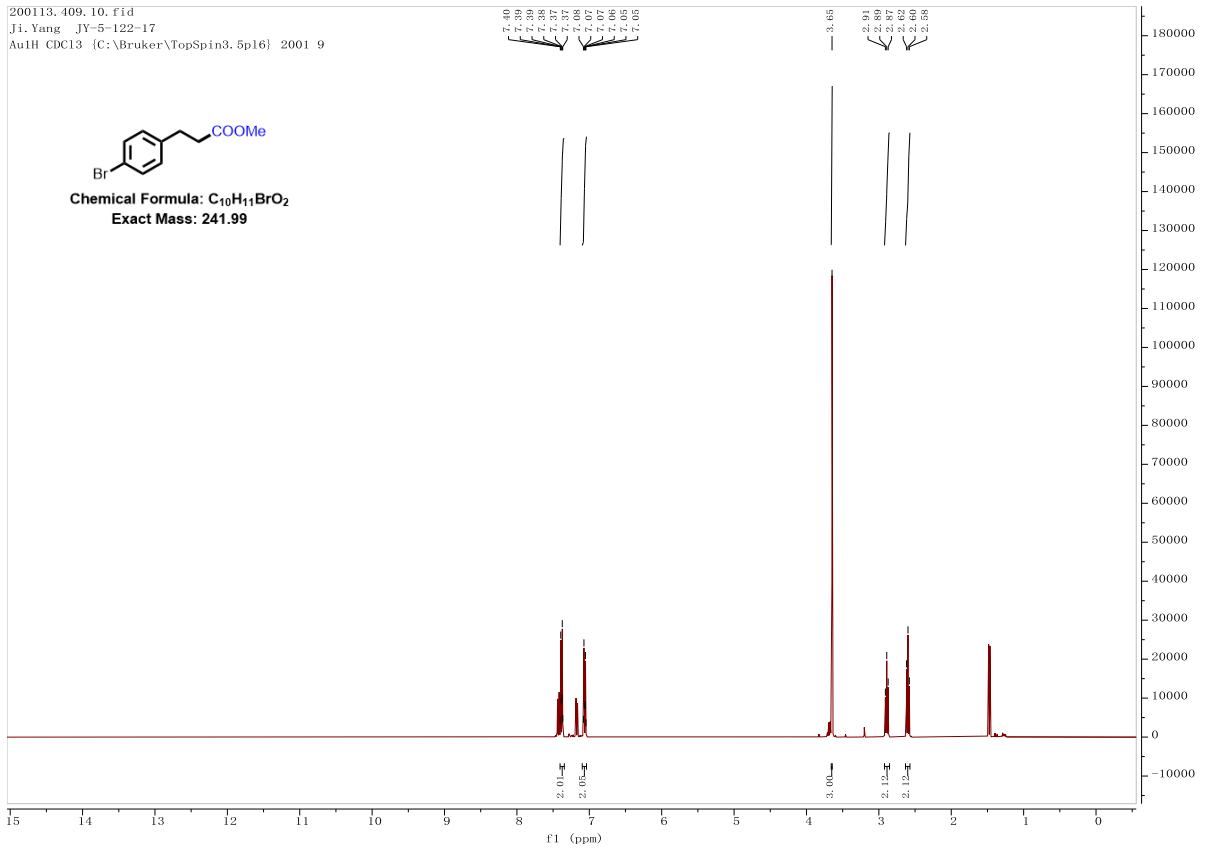

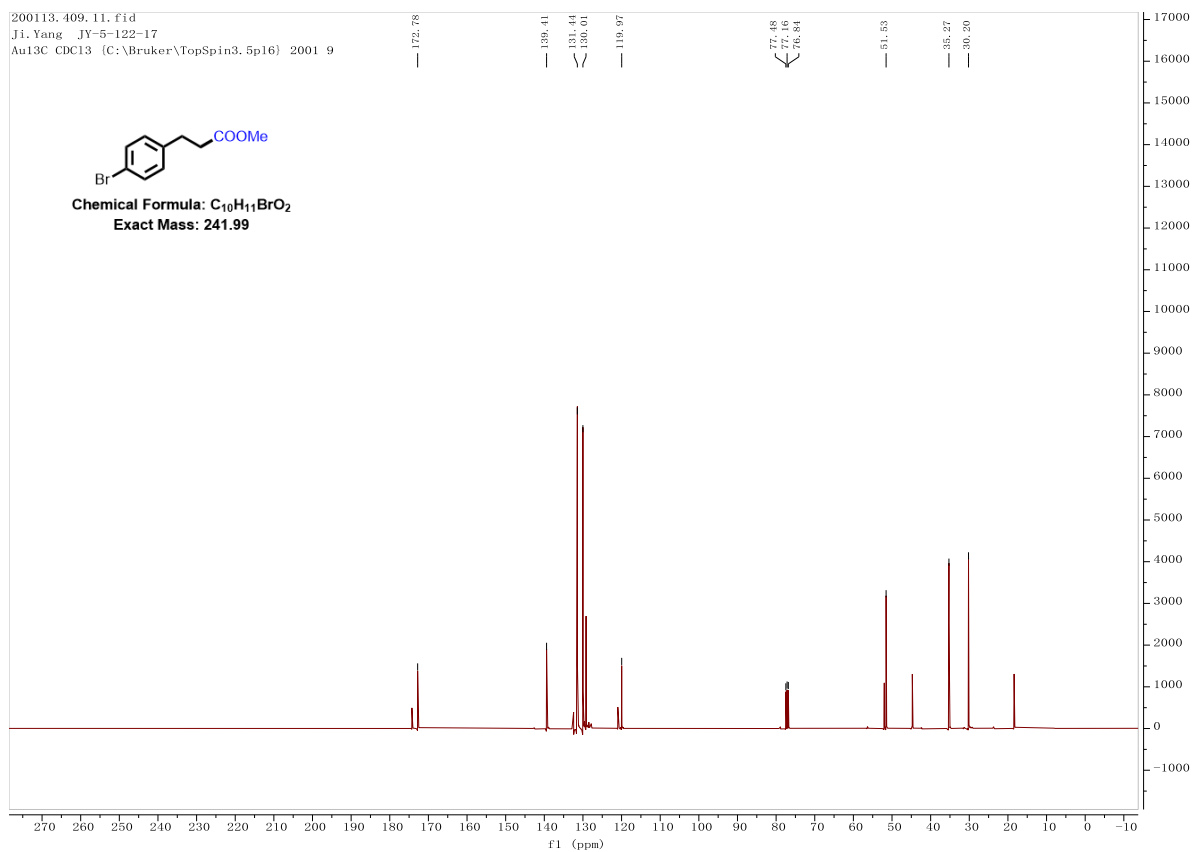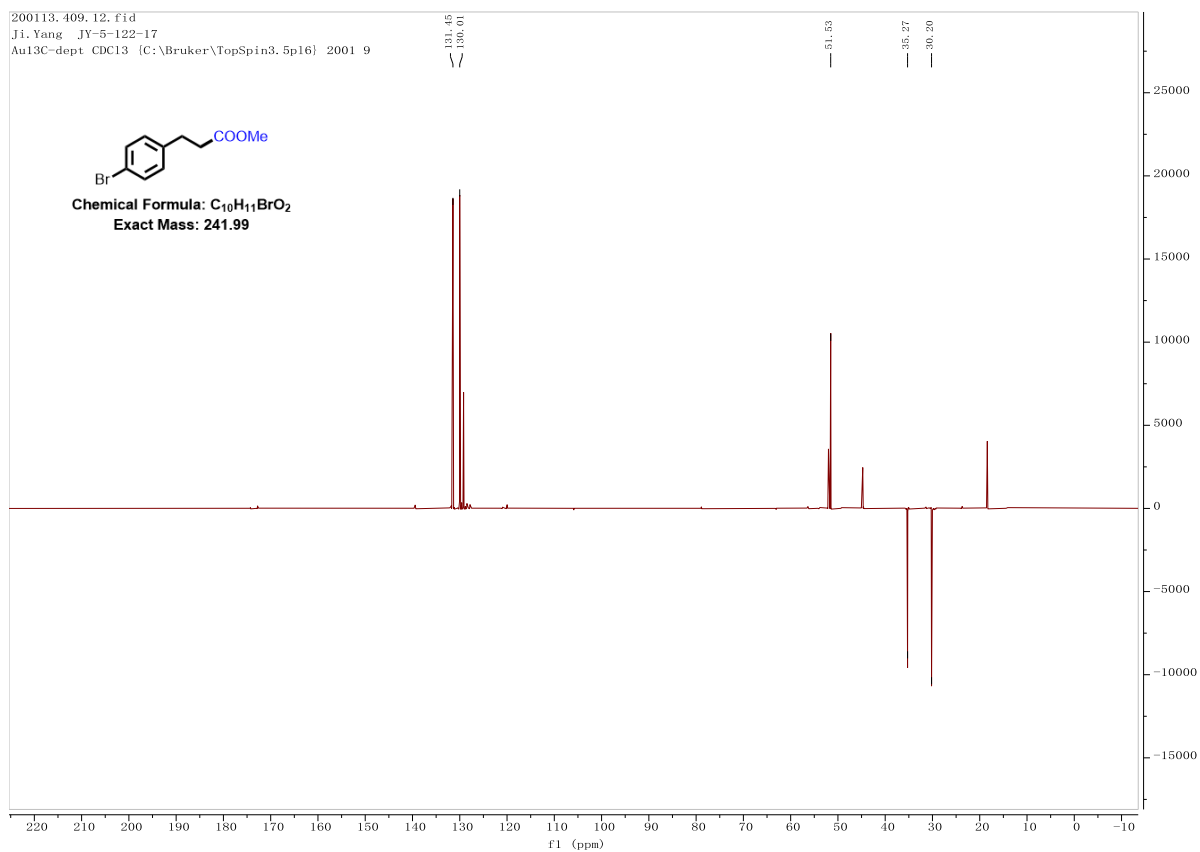

### Chromatogram and Results

| Injection Details    |                  |                   |               |
|----------------------|------------------|-------------------|---------------|
| Injection Name:      | JY-5-122-14-26-4 | Run Time (min):   | 40,00         |
| Vial Number:         | 114              | Injection Volume: | 2,00          |
| Injection Type:      | Unknown          | Channel:          | FrontDetector |
| Calibration Level:   |                  | Wavelength:       | n.a.          |
| Instrument Method:   | dong-40min       | Bandwidth:        | n.a.          |
| Processing Method:   | dong             | Dilution Factor:  | 1,0000        |
| Injection Date/Time: | 10.Jan.20 09:49  | Sample Weight:    | 1,0000        |

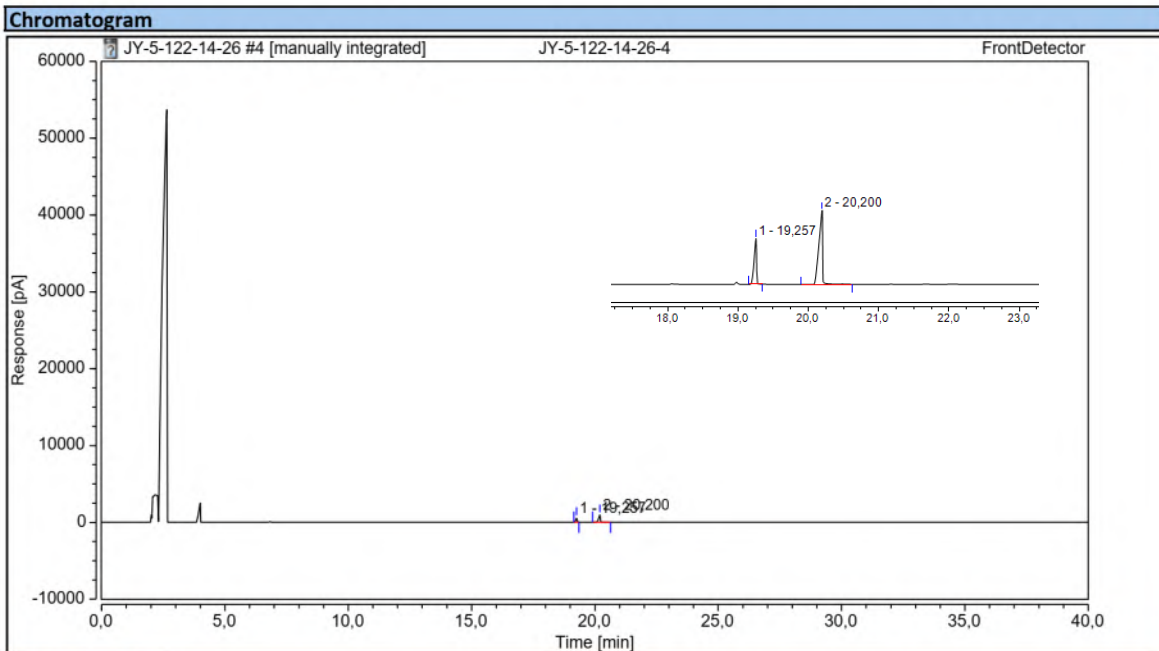

| Integration Results |             |                    |               |                 |                 |                   |        |
|---------------------|-------------|--------------------|---------------|-----------------|-----------------|-------------------|--------|
| No.                 | Peak Name   | Retention Time min | Area pA*min   | Height pA       | Relative Area % | Relative Height % | Amount |
| n.a.                | Component 2 | n.a.               | n.a.          | n.a.            | n.a.            | n.a.              | n.a.   |
| n.a.                | Component 3 | n.a.               | n.a.          | n.a.            | n.a.            | n.a.              | n.a.   |
| n.a.                | Component 4 | n.a.               | n.a.          | n.a.            | n.a.            | n.a.              | n.a.   |
| n.a.                | Component 5 | n.a.               | n.a.          | n.a.            | n.a.            | n.a.              | n.a.   |
| 1                   |             | 19,257             | 22,686        | 579,135         | 28,26           | 38,22             | n.a.   |
| 2                   |             | 20,200             | 57,588        | 936,177         | 71,74           | 61,78             | n.a.   |
| <b>Total:</b>       |             |                    | <b>80,273</b> | <b>1515,312</b> | <b>100,00</b>   | <b>100,00</b>     |        |



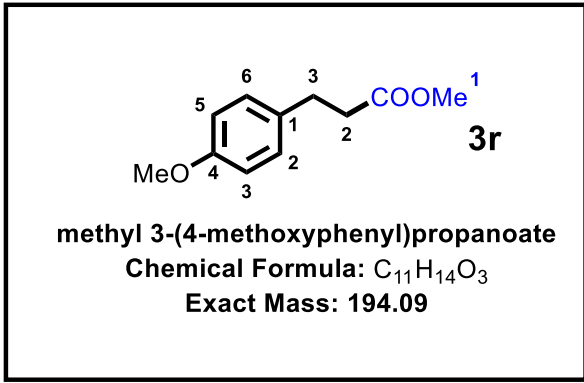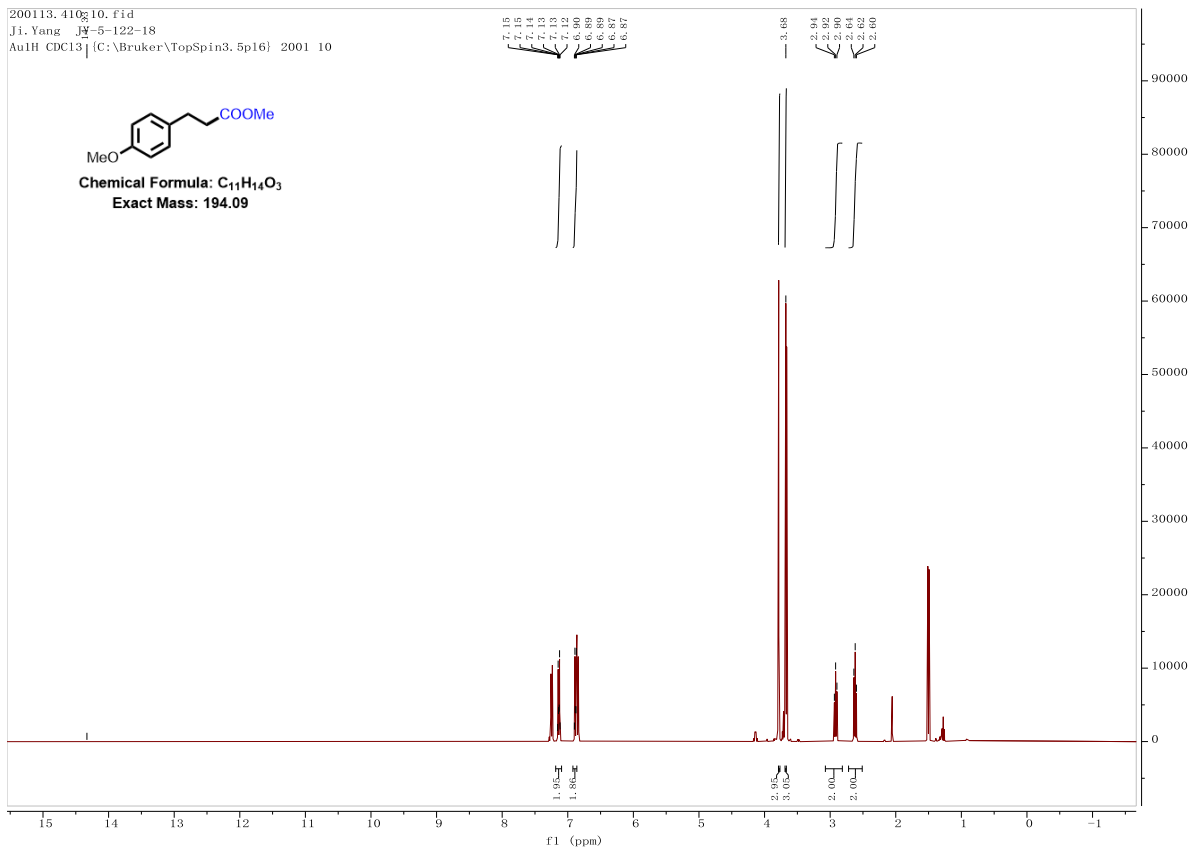

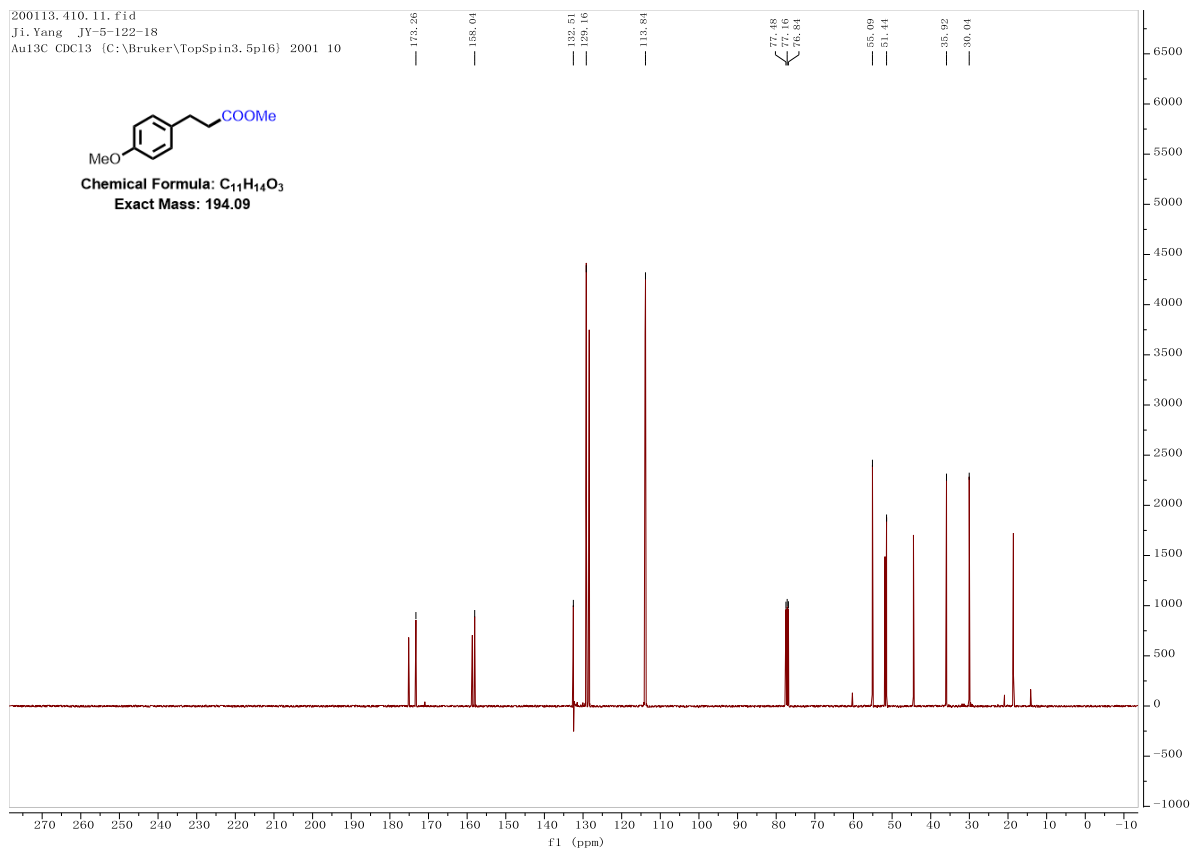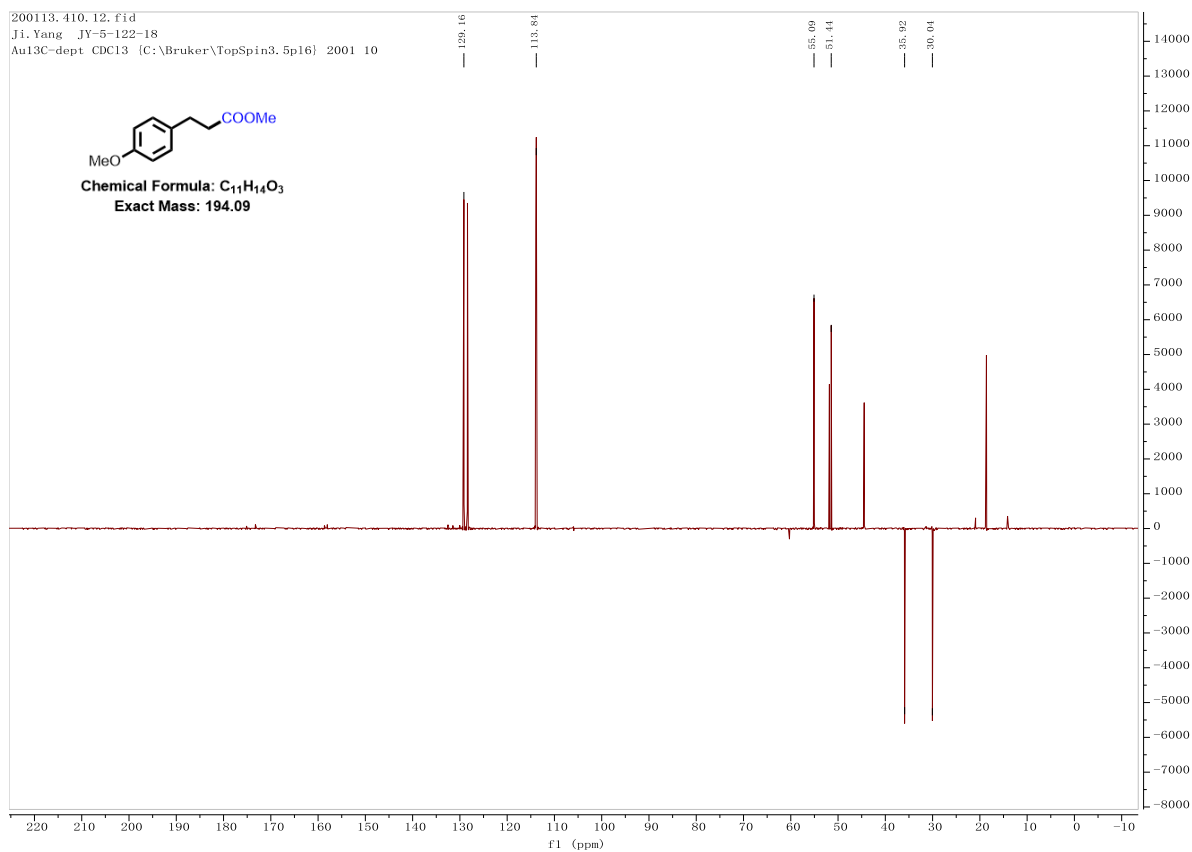

### Chromatogram and Results

| Injection Details    |                  |                   |               |
|----------------------|------------------|-------------------|---------------|
| Injection Name:      | JY-5-122-14-26-5 | Run Time (min):   | 40,00         |
| Vial Number:         | 115              | Injection Volume: | 2,00          |
| Injection Type:      | Unknown          | Channel:          | FrontDetector |
| Calibration Level:   |                  | Wavelength:       | n.a.          |
| Instrument Method:   | dong-40min       | Bandwidth:        | n.a.          |
| Processing Method:   | dong             | Dilution Factor:  | 1,0000        |
| Injection Date/Time: | 10.Jan.20 10:51  | Sample Weight:    | 1,0000        |

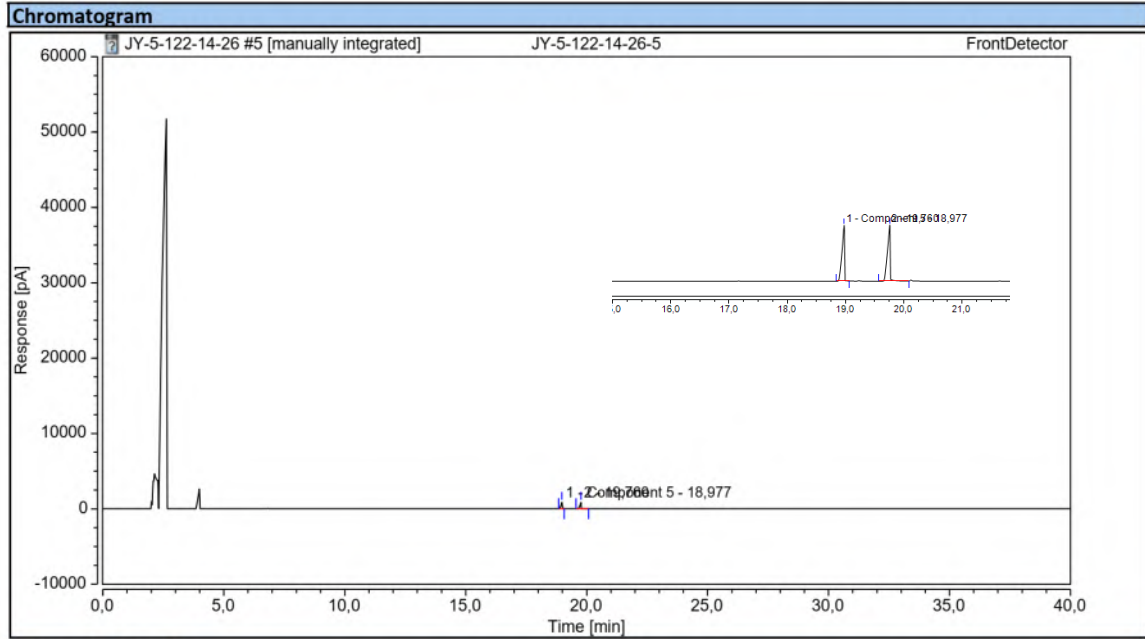

| Integration Results |             |                    |               |                 |                 |                   |        |
|---------------------|-------------|--------------------|---------------|-----------------|-----------------|-------------------|--------|
| No.                 | Peak Name   | Retention Time min | Area pA*min   | Height pA       | Relative Area % | Relative Height % | Amount |
| n.a.                | Component 2 | n.a.               | n.a.          | n.a.            | n.a.            | n.a.              | n.a.   |
| n.a.                | Component 3 | n.a.               | n.a.          | n.a.            | n.a.            | n.a.              | n.a.   |
| n.a.                | Component 4 | n.a.               | n.a.          | n.a.            | n.a.            | n.a.              | n.a.   |
| 1                   | Component 5 | 18,977             | 43,034        | 853,471         | 47,63           | 49,84             | n.a.   |
| 2                   |             | 19,760             | 47,318        | 858,890         | 52,37           | 50,16             | n.a.   |
| <b>Total:</b>       |             |                    | <b>90,352</b> | <b>1712,361</b> | <b>100,00</b>   | <b>100,00</b>     |        |

File :D:\MSDCHEM\1\DATA\2001\JY-5-122-18.D  
Operator :  
Acquired : 10 Jan 2020 13:13 using AcqMethod SK3-30X.M  
Instrument : GC-MSD  
Sample Name: JY-5-122-18  
Misc Info :  
Vial Number: 40

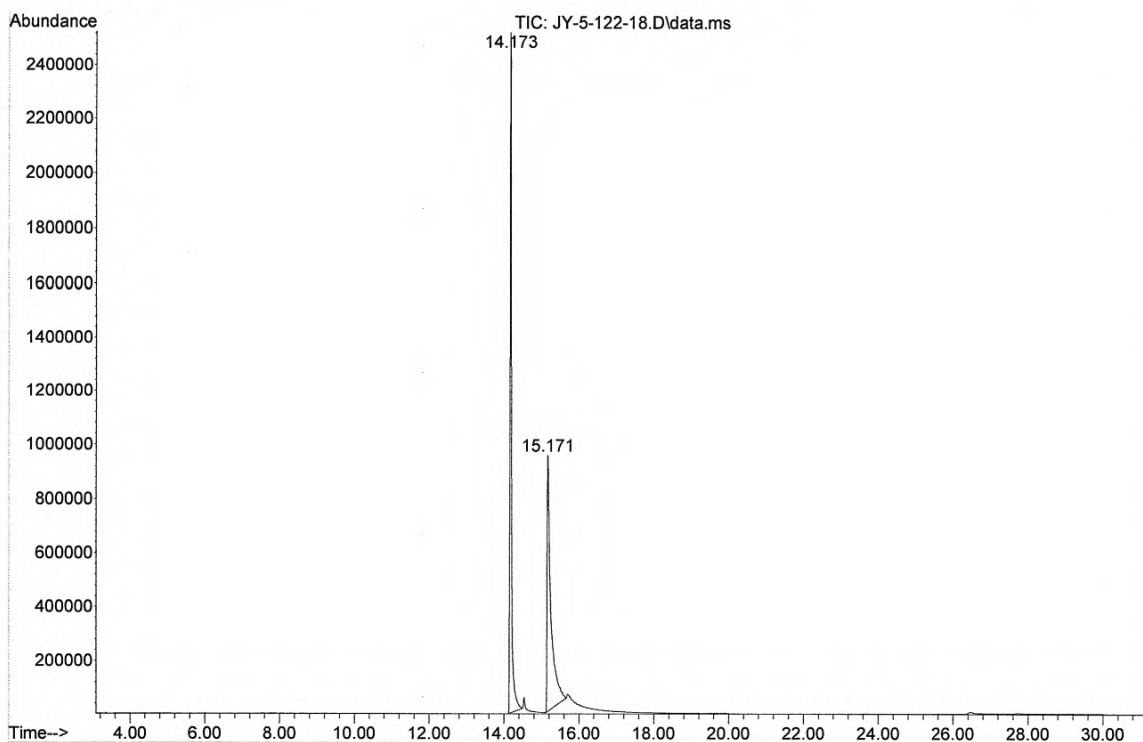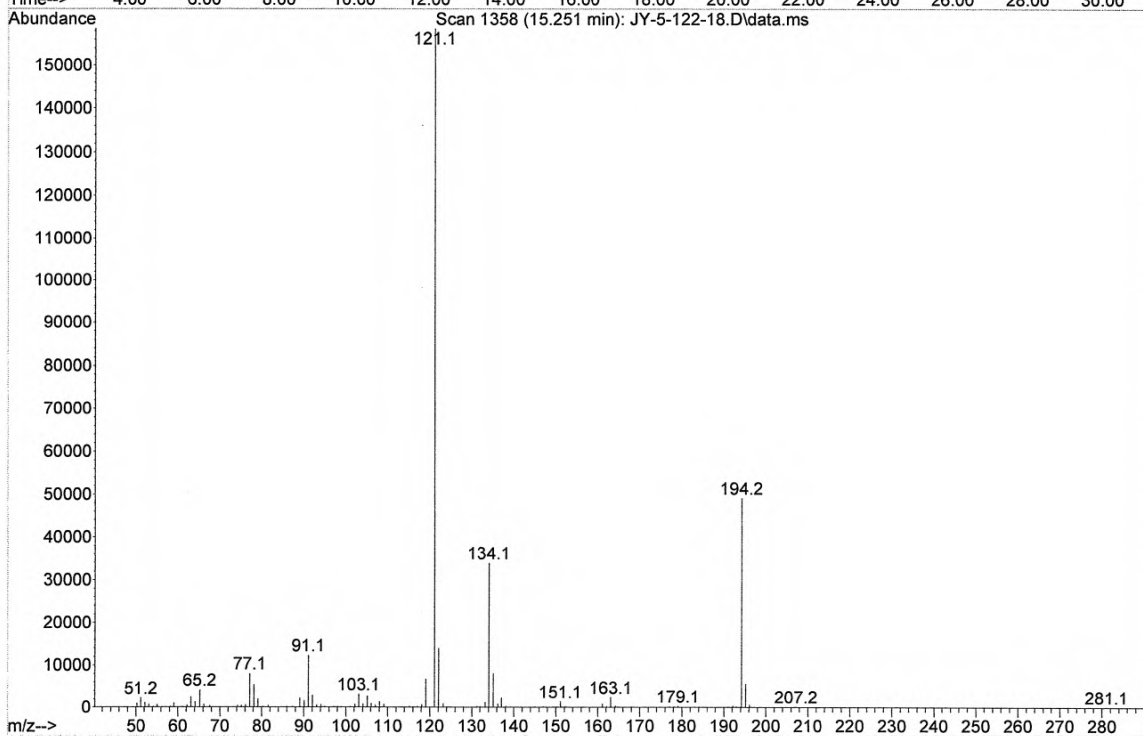

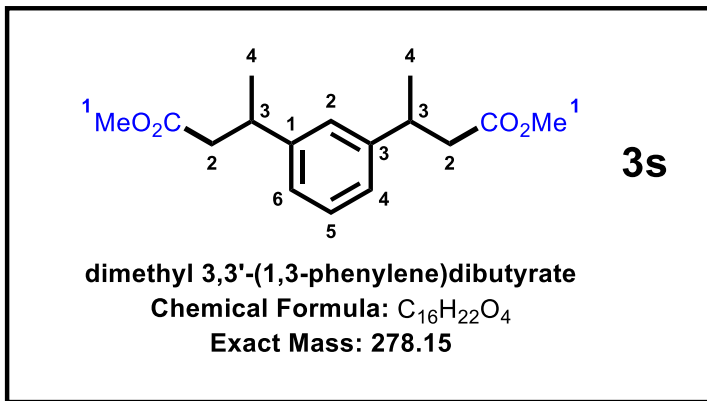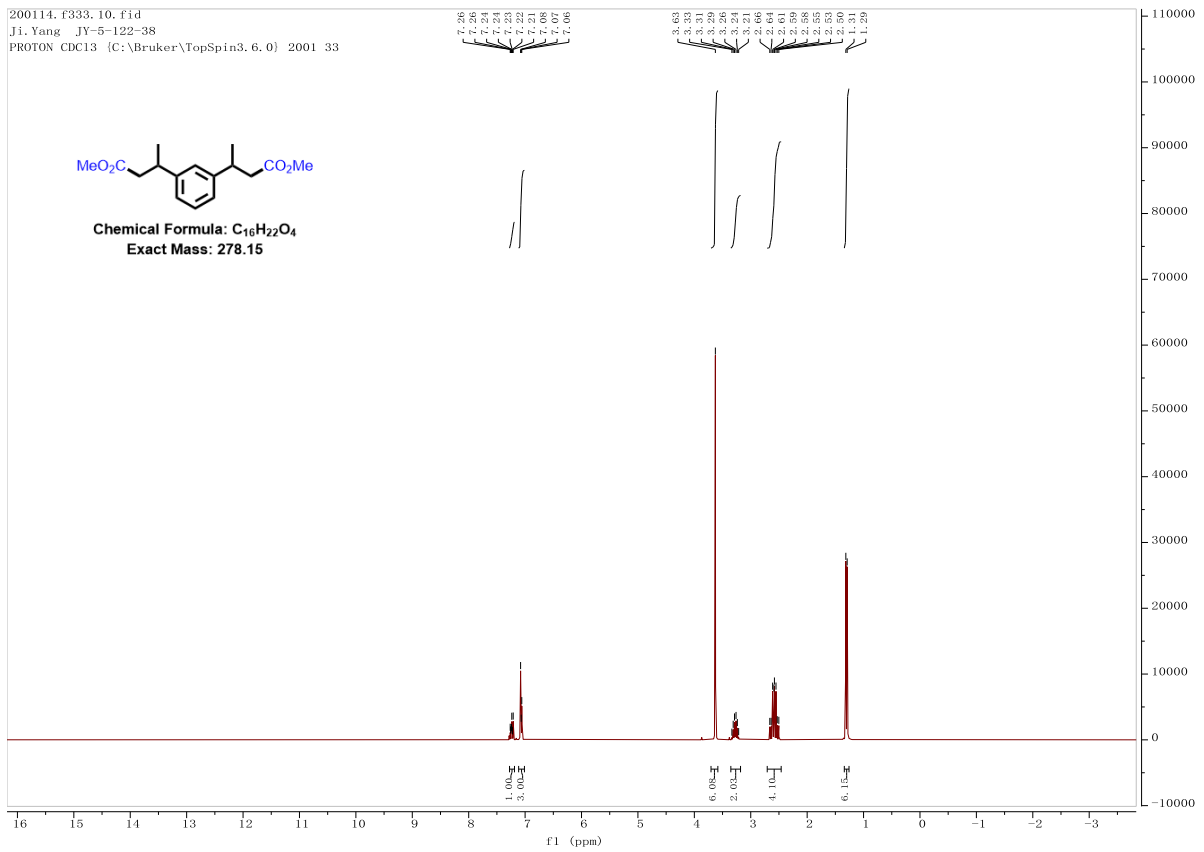

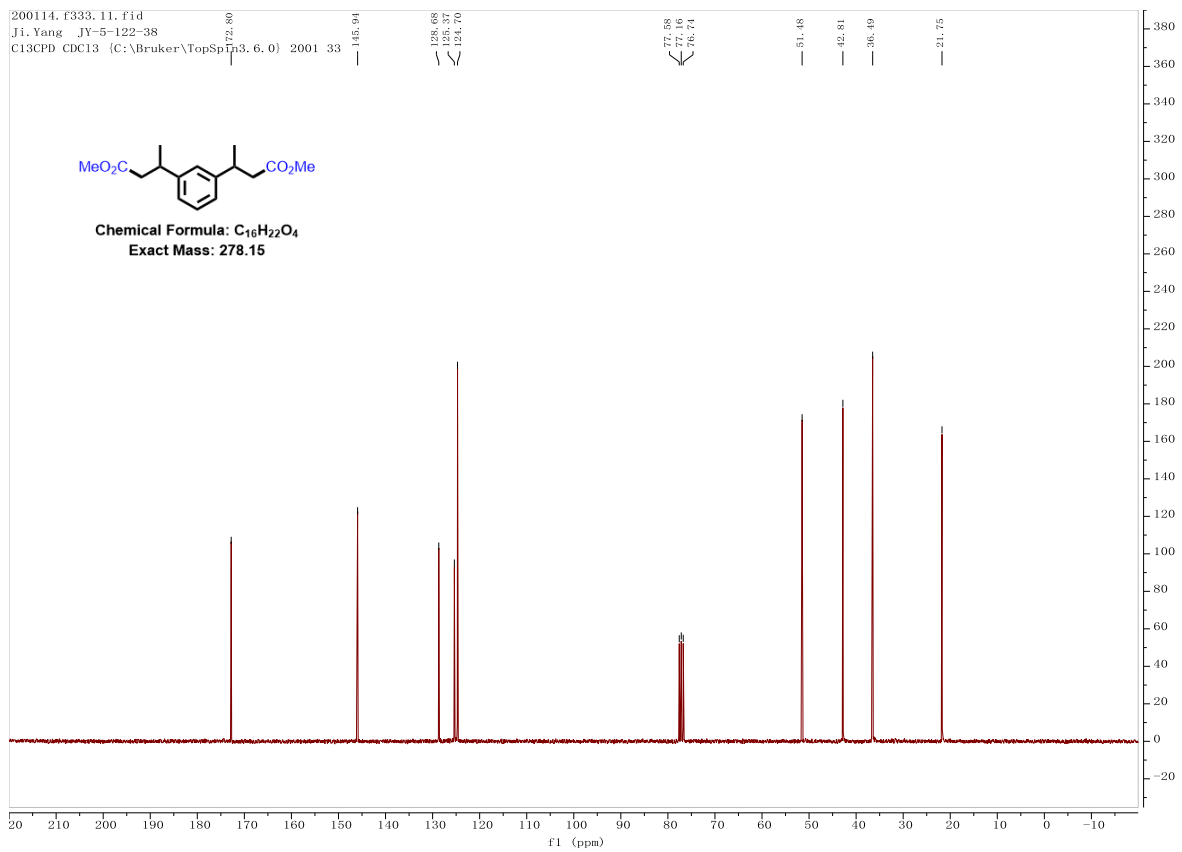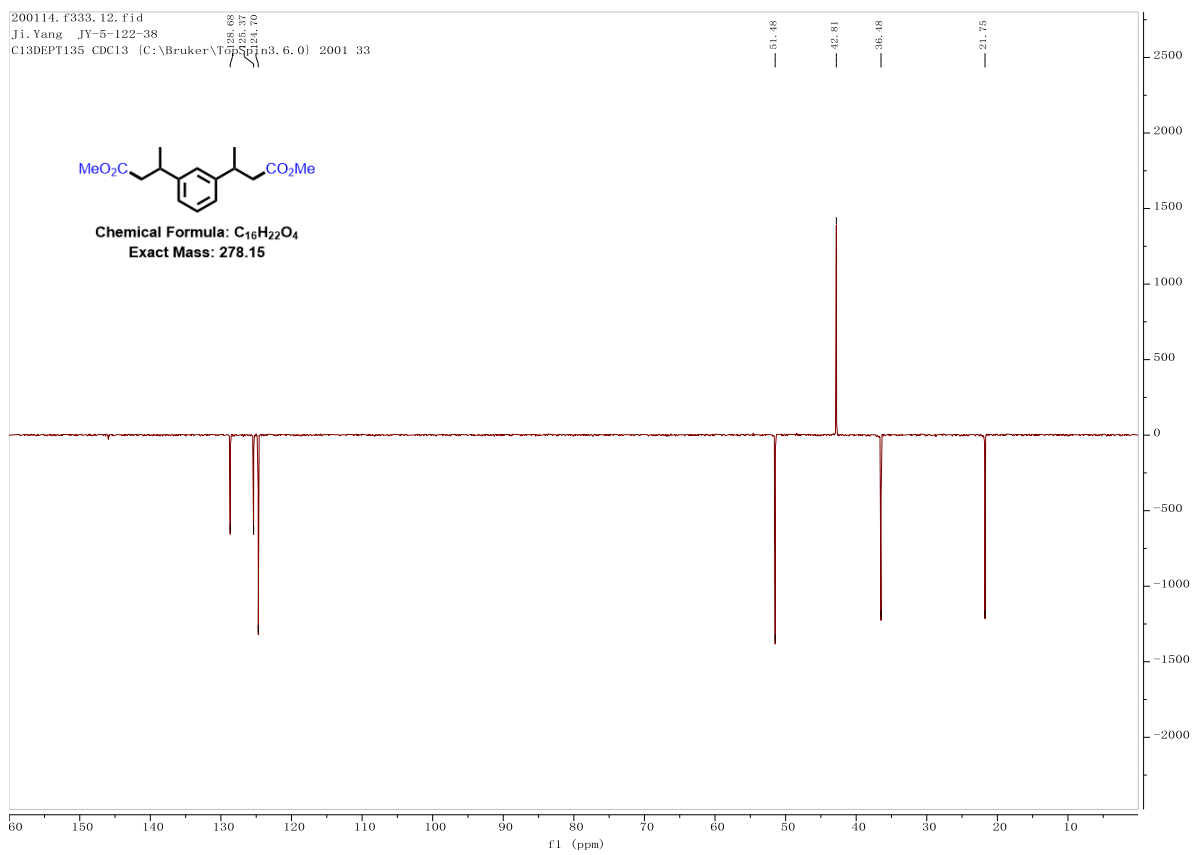

## Chromatogram and Results

| Injection Details    |                   |                         |
|----------------------|-------------------|-------------------------|
| Injection Name:      | JY-5-122-27-39-12 | Run Time (min): 40,00   |
| Vial Number:         | 36                | Injection Volume: 2,00  |
| Injection Type:      | Unknown           | Channel: FrontDetector  |
| Calibration Level:   |                   | Wavelength: n.a.        |
| Instrument Method:   | dong-40min        | Bandwidth: n.a.         |
| Processing Method:   | dong              | Dilution Factor: 1,0000 |
| Injection Date/Time: | 12.Jan.20 00:32   | Sample Weight: 1,0000   |

### Chromatogram

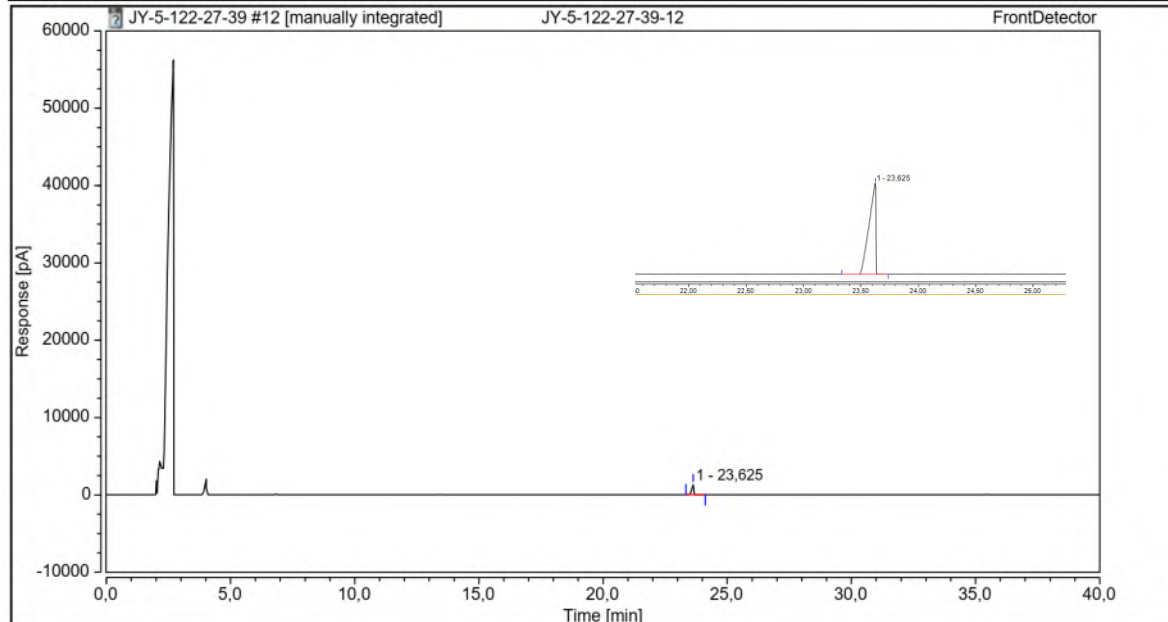

### Integration Results

| No.    | Peak Name   | Retention Time<br>min | Area<br>pA*min | Height<br>pA | Relative Area<br>% | Relative Height<br>% | Amount |
|--------|-------------|-----------------------|----------------|--------------|--------------------|----------------------|--------|
| n.a.   | Component 2 | n.a.                  | n.a.           | n.a.         | n.a.               | n.a.                 | n.a.   |
| n.a.   | Component 3 | n.a.                  | n.a.           | n.a.         | n.a.               | n.a.                 | n.a.   |
| n.a.   | Component 4 | n.a.                  | n.a.           | n.a.         | n.a.               | n.a.                 | n.a.   |
| n.a.   | Component 5 | n.a.                  | n.a.           | n.a.         | n.a.               | n.a.                 | n.a.   |
| 1      |             | 23,625                | 88,066         | 1289,907     | 100,00             | 100,00               | n.a.   |
| Total: |             |                       | 88,066         | 1289,907     | 100,00             | 100,00               |        |

File :D:\MSDCHEM\1\DATA\2001\JY-5-122-38.D  
Operator :  
Acquired : 11 Jan 2020 23:03 using AcqMethod SK3-30X.M  
Instrument : GC-MSD  
Sample Name: JY-5-122-38  
Misc Info :  
Vial Number: 42

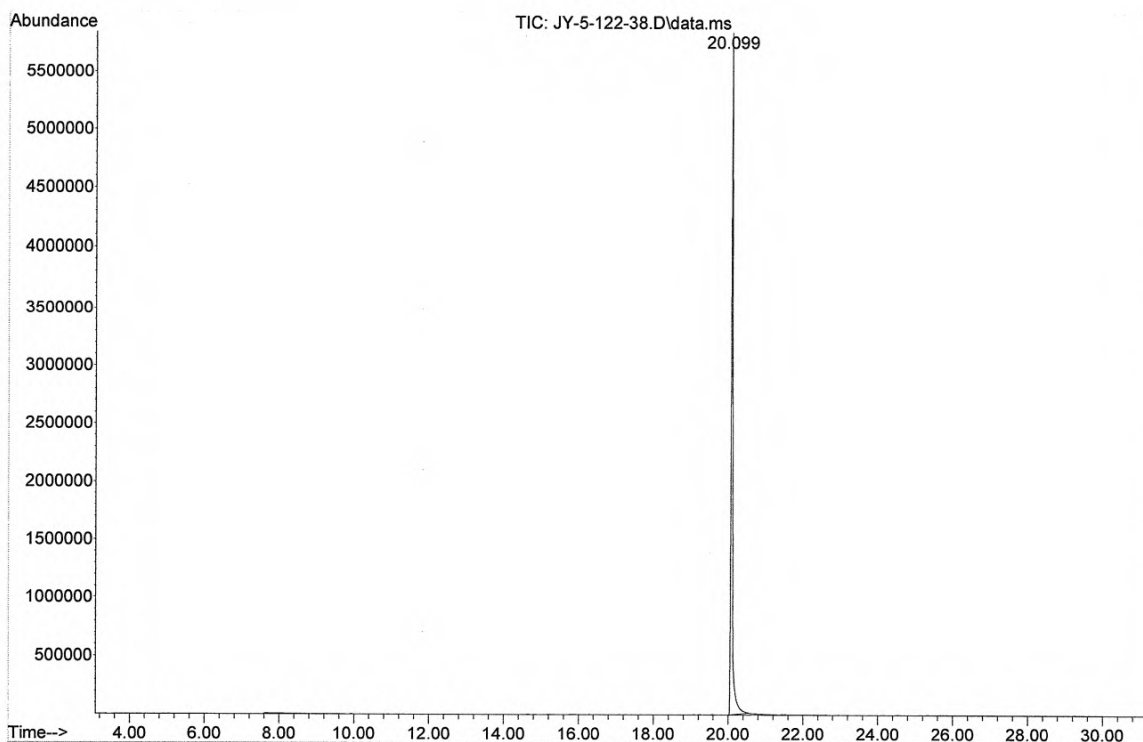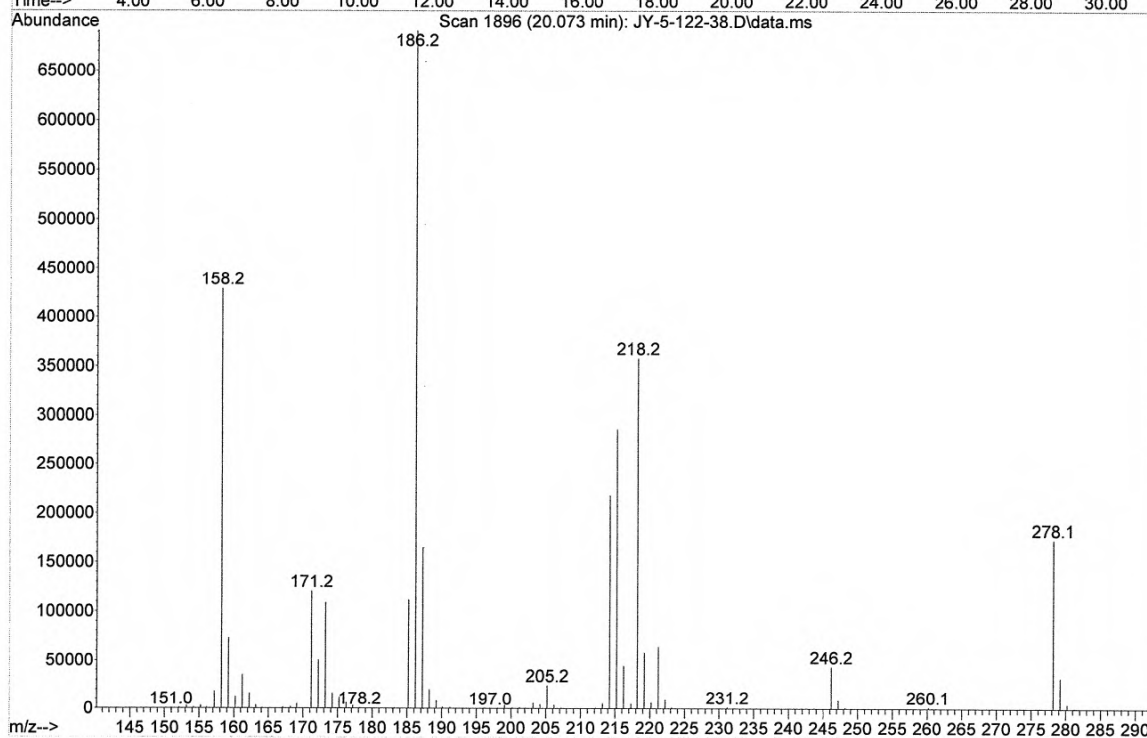



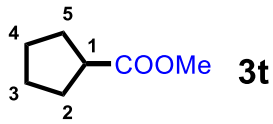

methyl cyclopentanecarboxylate  
 Chemical Formula:  $C_7H_{12}O_2$   
 Exact Mass: 128.08

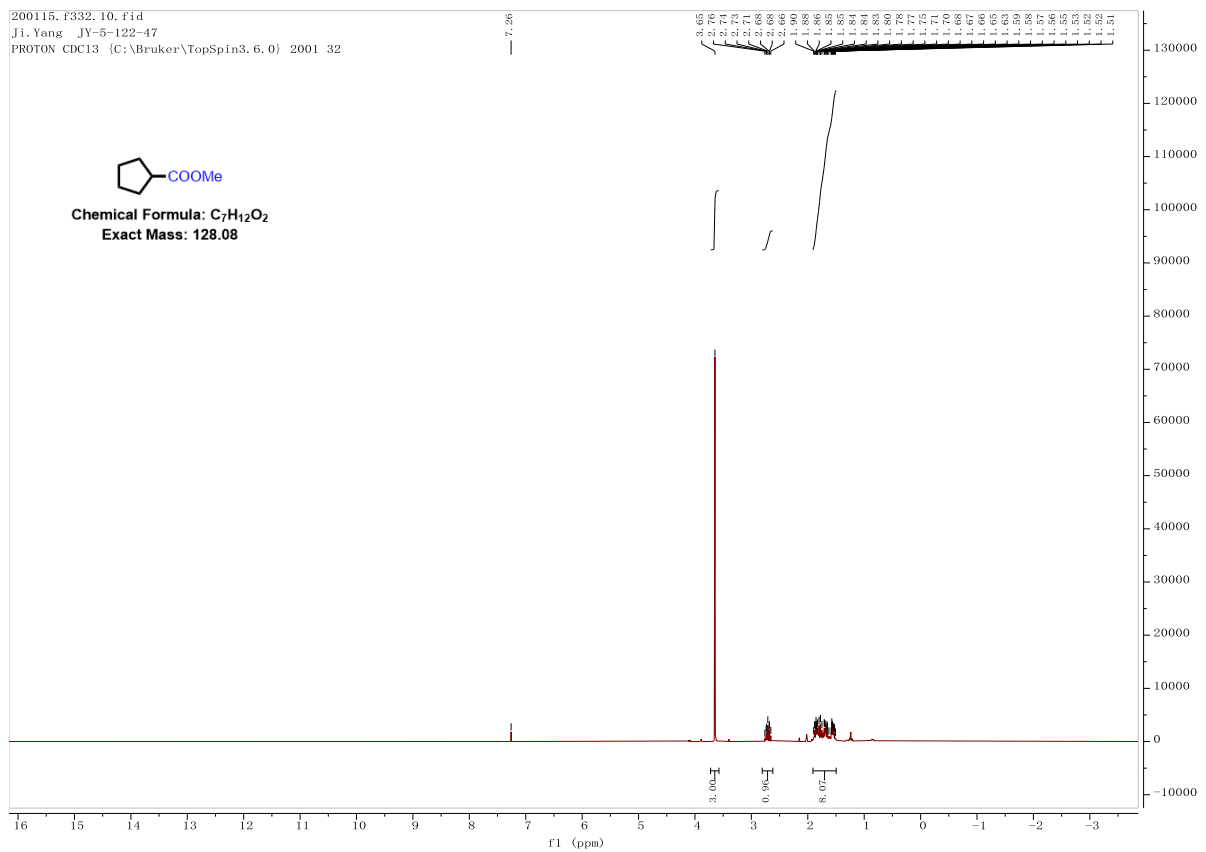

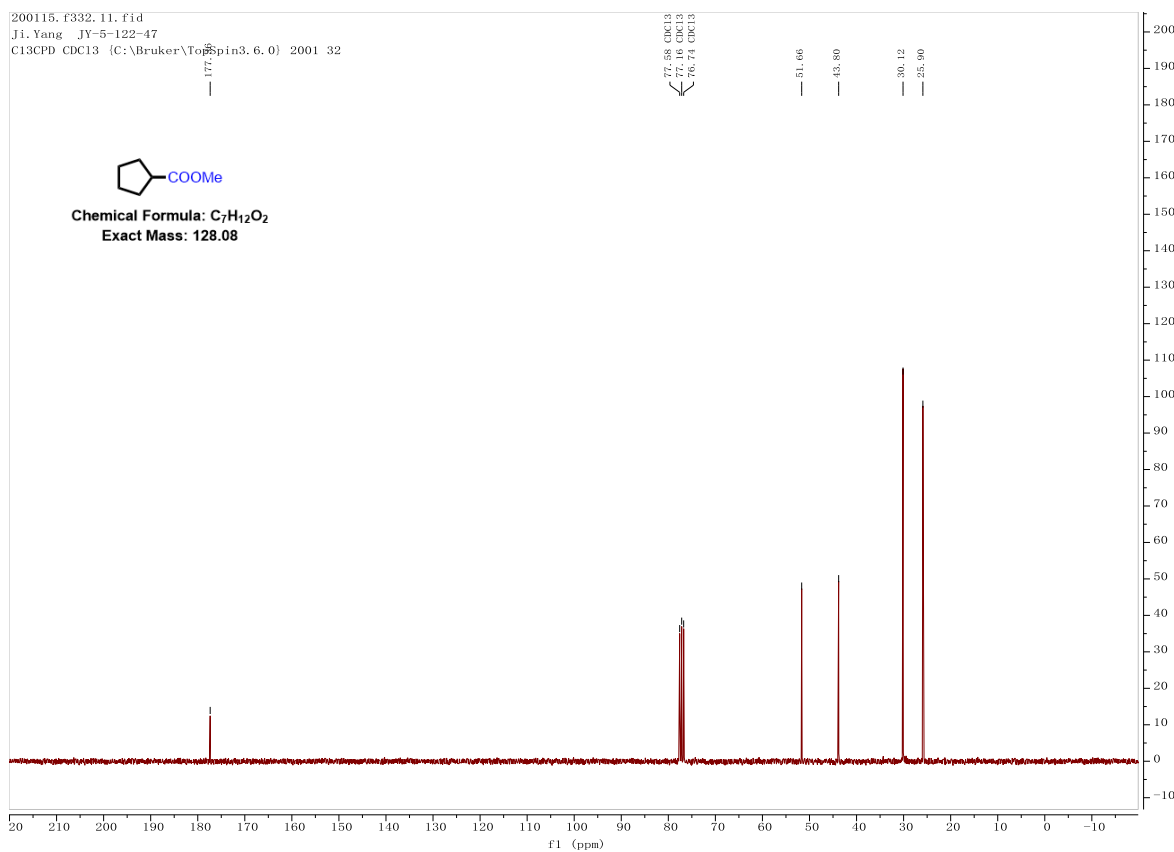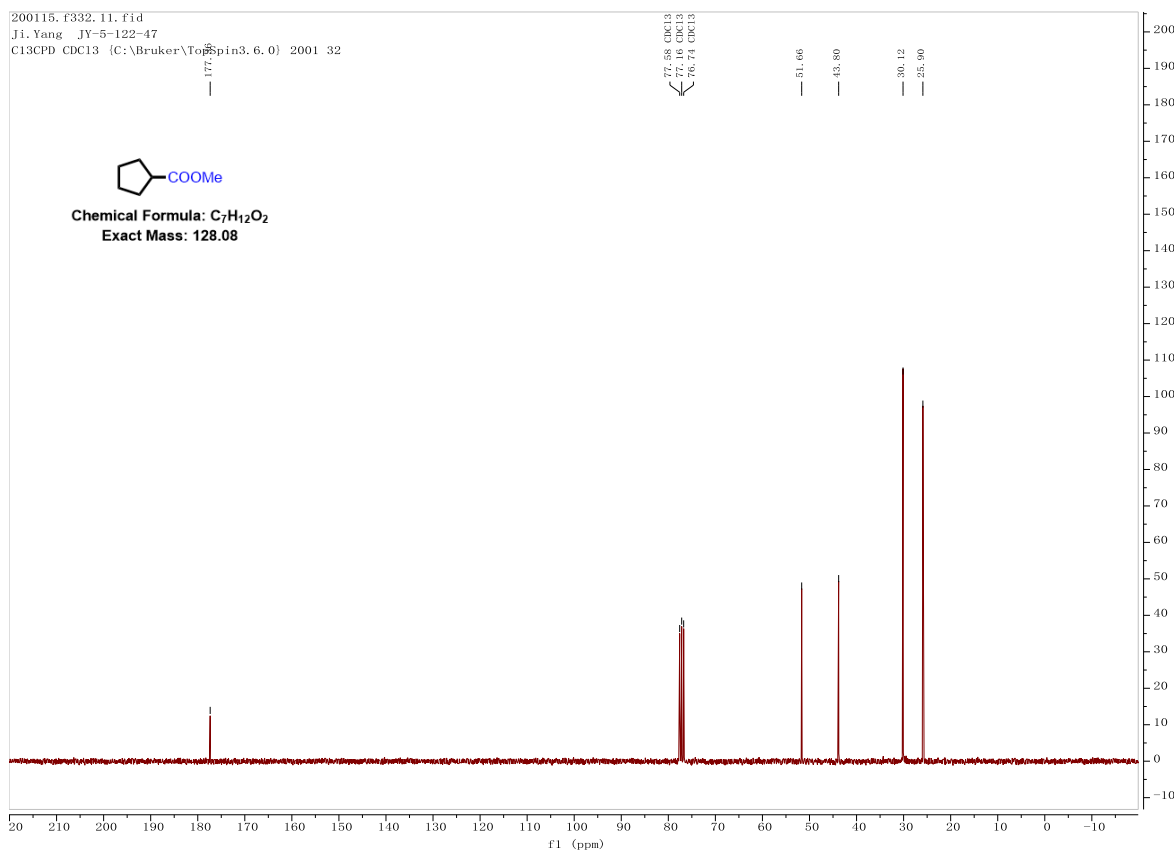

### Chromatogram and Results

| Injection Details    |                 |                   |               |
|----------------------|-----------------|-------------------|---------------|
| Injection Name:      | JY-5-122-8      | Run Time (min):   | 40,00         |
| Vial Number:         | 68              | Injection Volume: | 2,00          |
| Injection Type:      | Unknown         | Channel:          | FrontDetector |
| Calibration Level:   |                 | Wavelength:       | n.a.          |
| Instrument Method:   | dong-40min      | Bandwidth:        | n.a.          |
| Processing Method:   | dong            | Dilution Factor:  | 1,0000        |
| Injection Date/Time: | 09.Jan.20 22:34 | Sample Weight:    | 1,0000        |

### Chromatogram

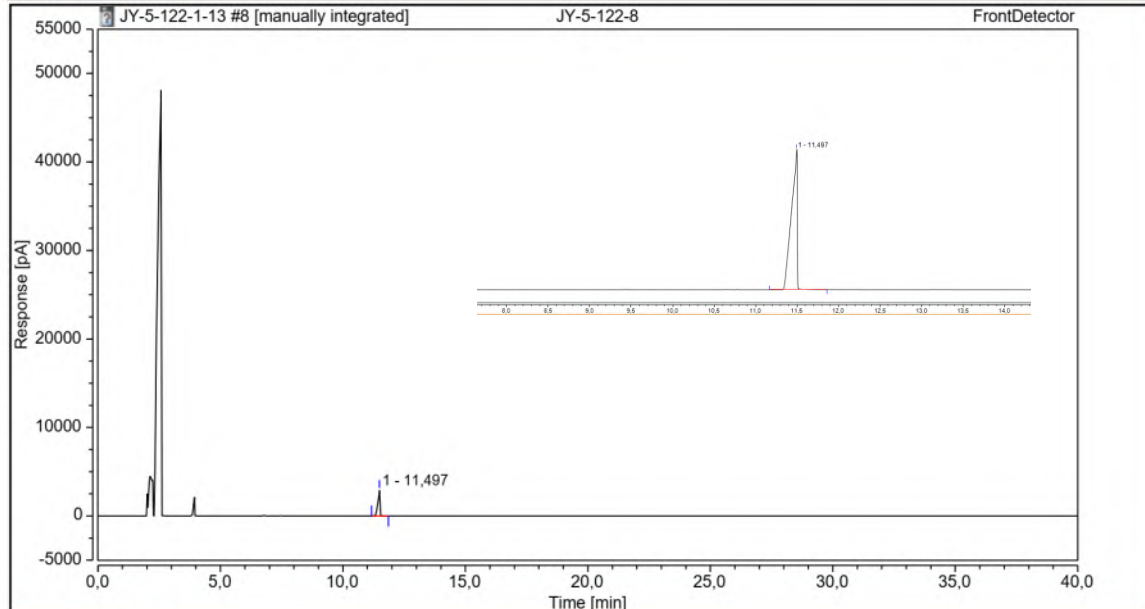

### Integration Results

| No.    | Peak Name   | Retention Time<br>min | Area<br>pA*min | Height<br>pA | Relative Area<br>% | Relative Height<br>% | Amount |
|--------|-------------|-----------------------|----------------|--------------|--------------------|----------------------|--------|
| n.a.   | Component 2 | n.a.                  | n.a.           | n.a.         | n.a.               | n.a.                 | n.a.   |
| n.a.   | Component 3 | n.a.                  | n.a.           | n.a.         | n.a.               | n.a.                 | n.a.   |
| 1      |             | 11,497                | 233,454        | 2874,648     | 100,00             | 100,00               | n.a.   |
| n.a.   | Component 4 | n.a.                  | n.a.           | n.a.         | n.a.               | n.a.                 | n.a.   |
| n.a.   | Component 5 | n.a.                  | n.a.           | n.a.         | n.a.               | n.a.                 | n.a.   |
| Total: |             |                       | 233,454        | 2874,648     | 100,00             | 100,00               |        |

File :D:\MSDCHEM\1\DATA\2001\JY-5-122-8.D  
Operator :  
Acquired : 9 Jan 2020 19:40 using AcqMethod SK3-30X.M  
Instrument : GC-MSD  
Sample Name: JY-5-122-8  
Misc Info :  
Vial Number: 43

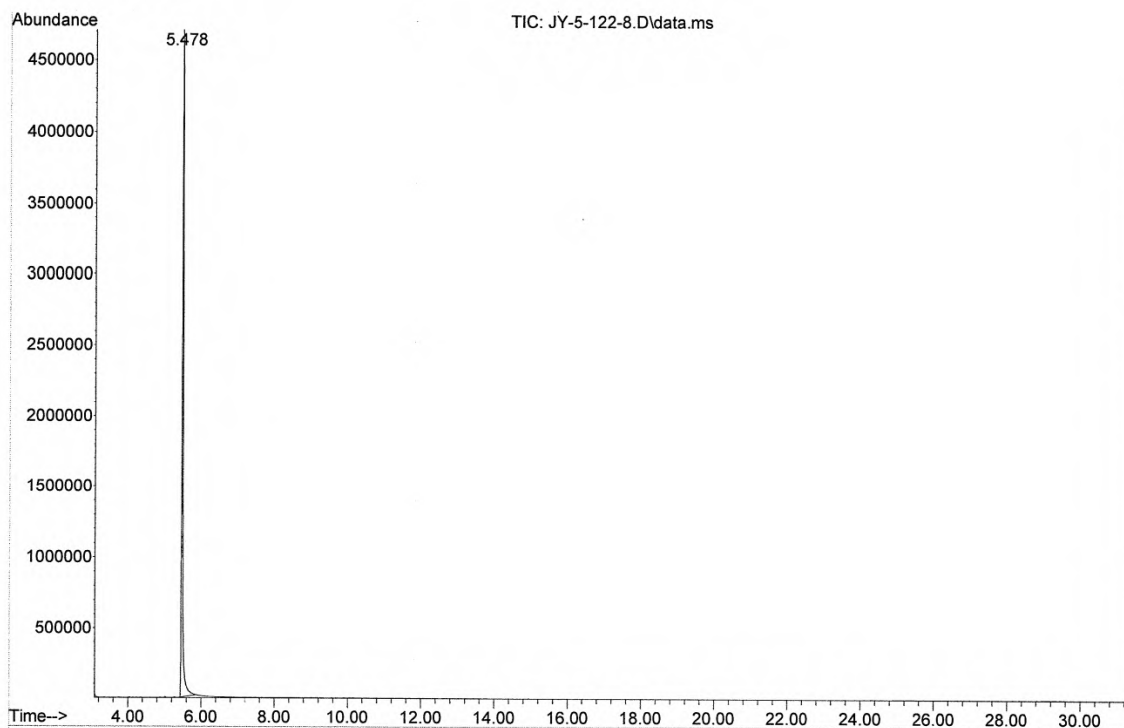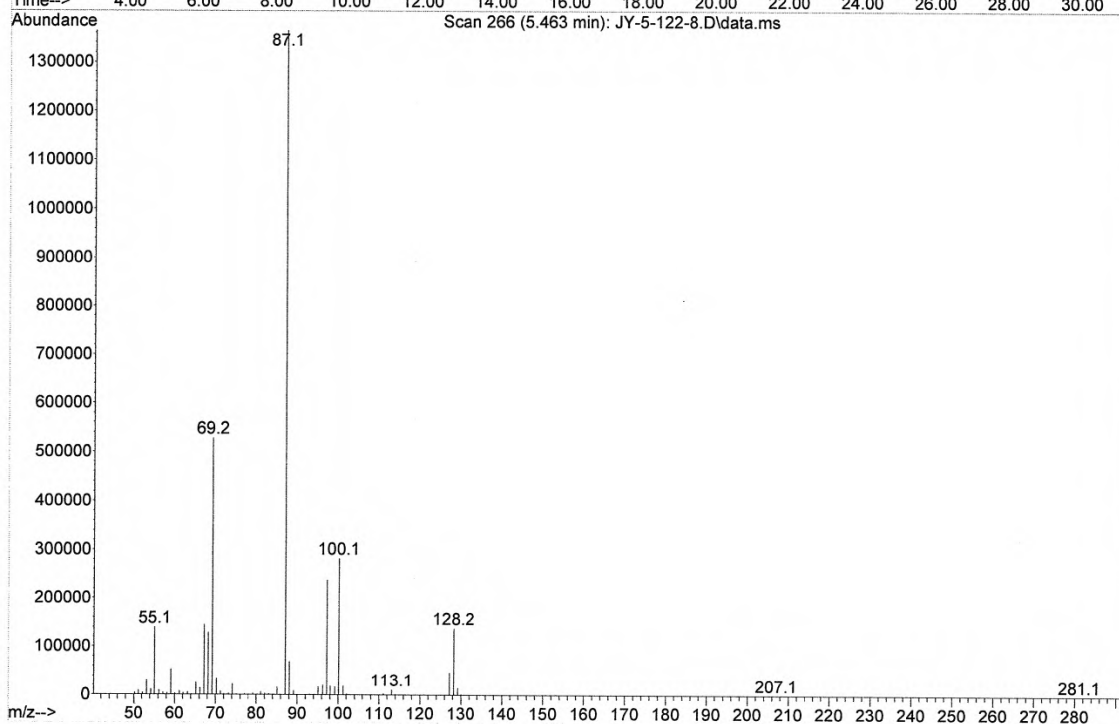

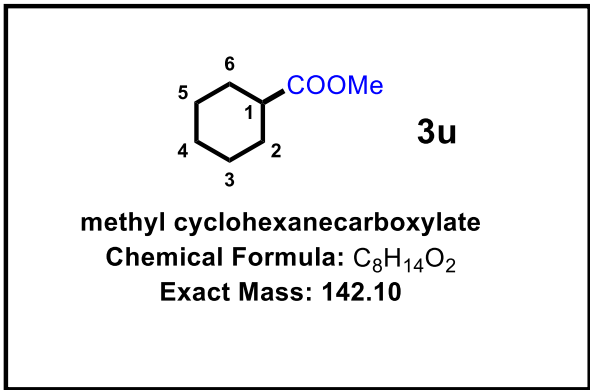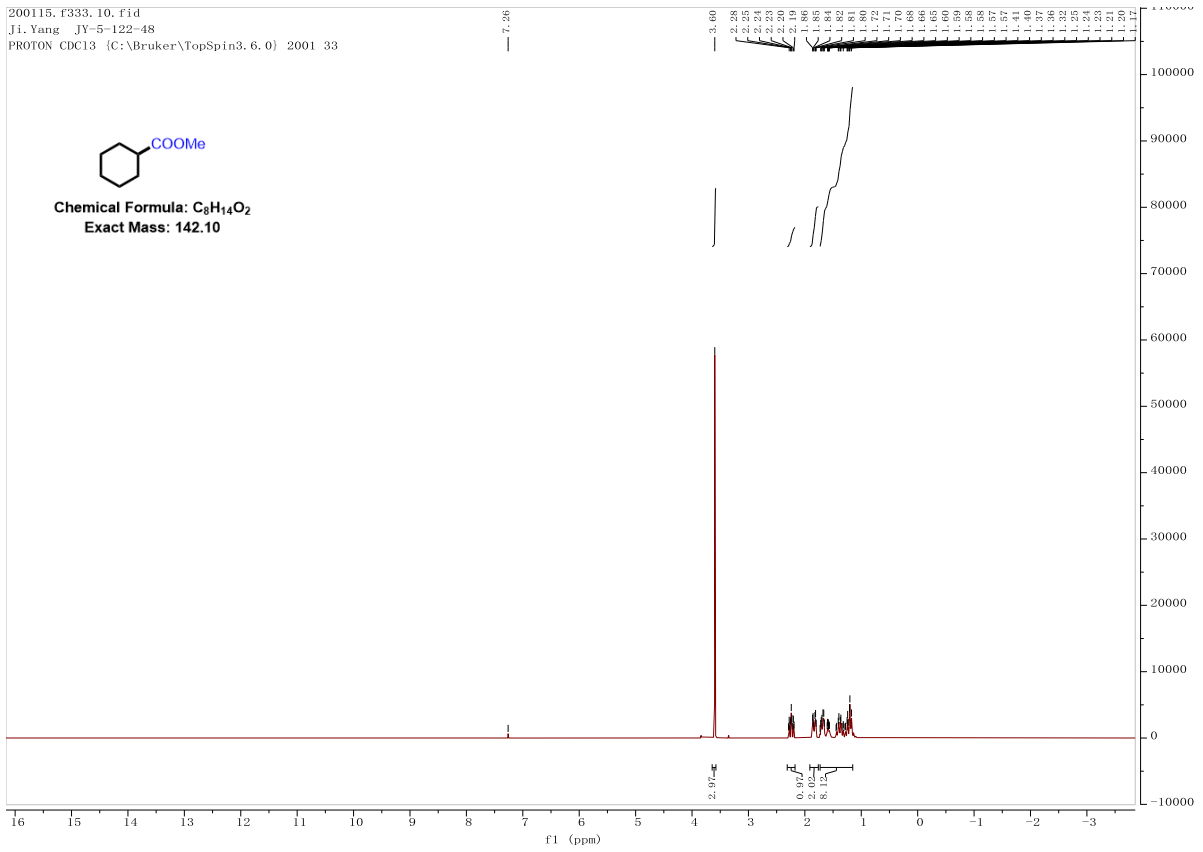

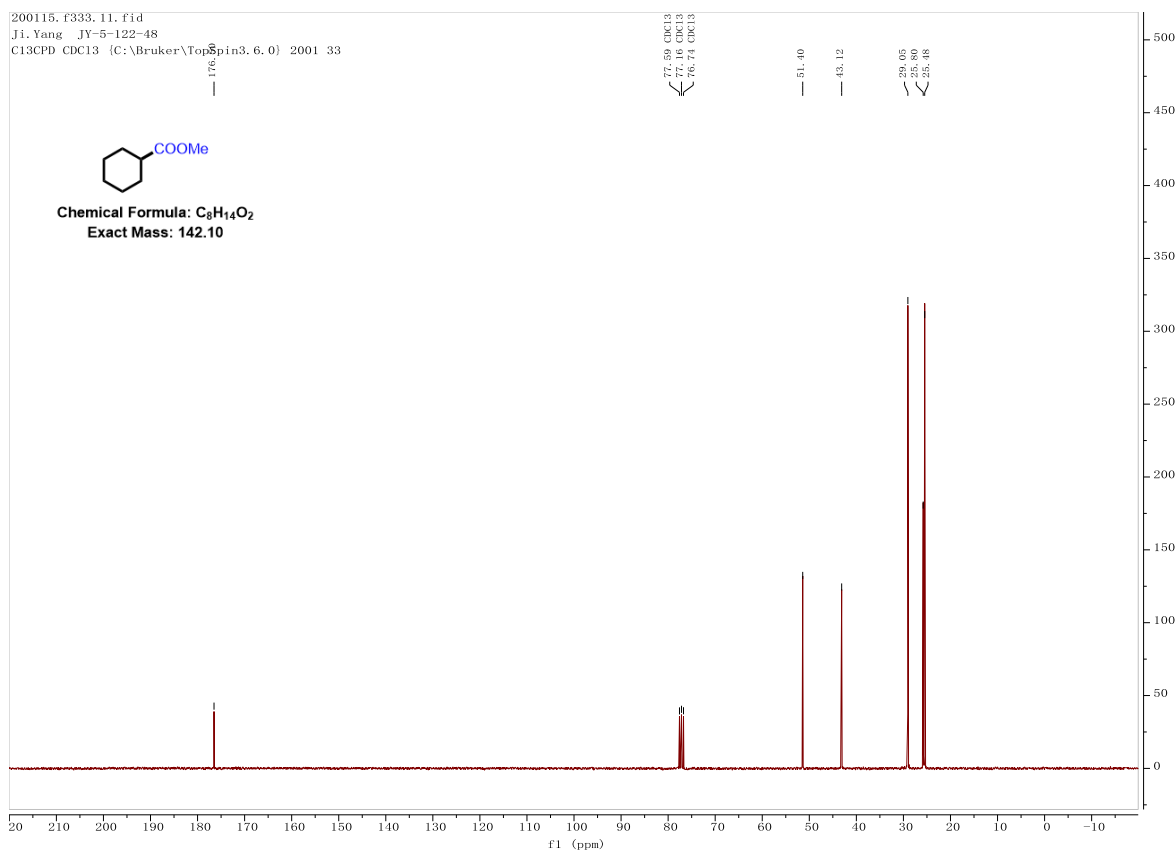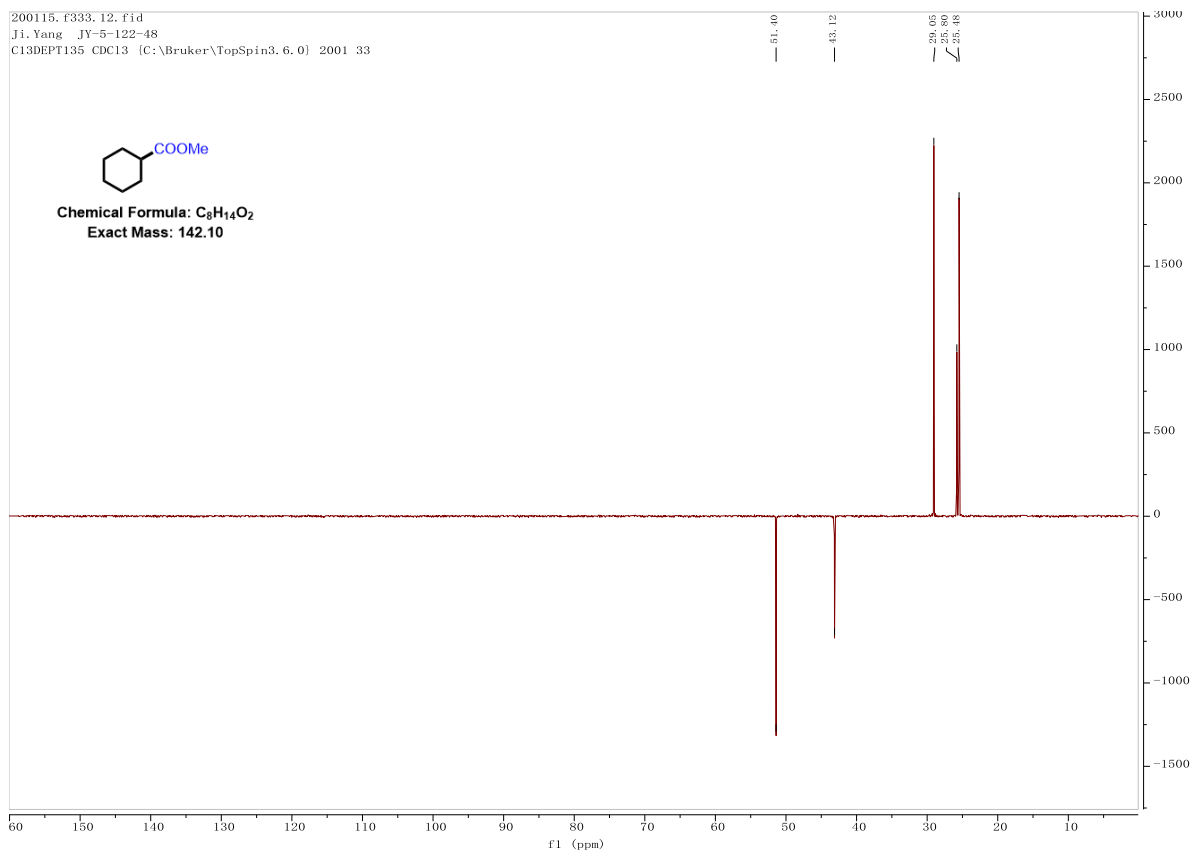

### Chromatogram and Results

| Injection Details    |                 |                   |               |
|----------------------|-----------------|-------------------|---------------|
| Injection Name:      | JY-5-122-9      | Run Time (min):   | 40,00         |
| Vial Number:         | 69              | Injection Volume: | 2,00          |
| Injection Type:      | Unknown         | Channel:          | FrontDetector |
| Calibration Level:   |                 | Wavelength:       | n.a.          |
| Instrument Method:   | dong-40min      | Bandwidth:        | n.a.          |
| Processing Method:   | dong            | Dilution Factor:  | 1,0000        |
| Injection Date/Time: | 09.Jan.20 23:36 | Sample Weight:    | 1,0000        |

#### Chromatogram

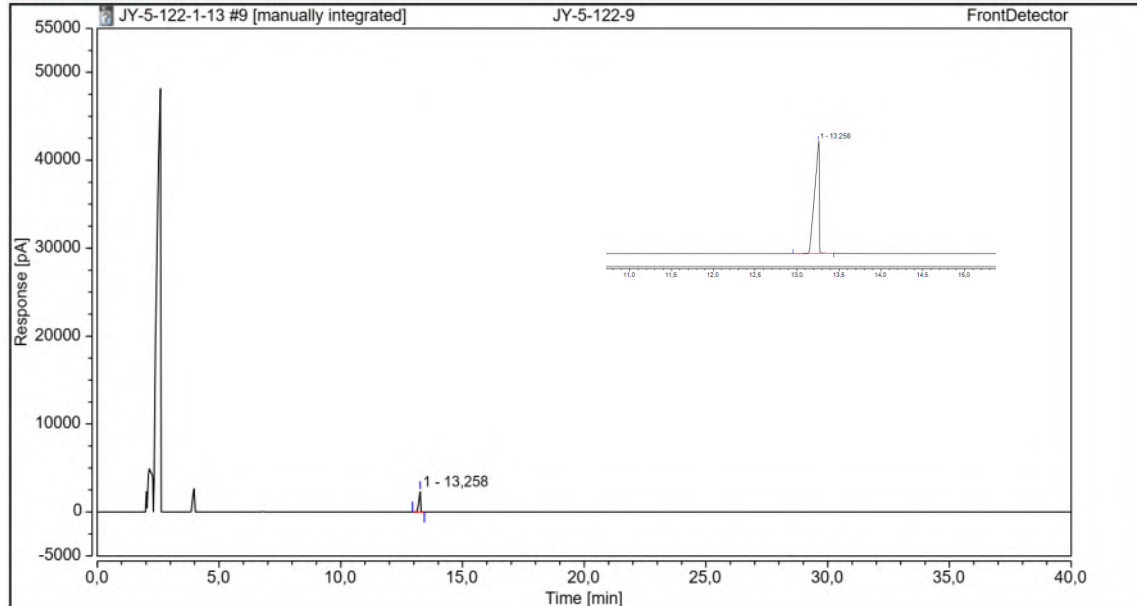

#### Integration Results

| No.    | Peak Name   | Retention Time<br>min | Area<br>pA*min | Height<br>pA | Relative Area<br>% | Relative Height<br>% | Amount |
|--------|-------------|-----------------------|----------------|--------------|--------------------|----------------------|--------|
| n.a.   | Component 2 | n.a.                  | n.a.           | n.a.         | n.a.               | n.a.                 | n.a.   |
| n.a.   | Component 3 | n.a.                  | n.a.           | n.a.         | n.a.               | n.a.                 | n.a.   |
| 1      |             | 13,258                | 141,526        | 2288,091     | 100,00             | 100,00               | n.a.   |
| n.a.   | Component 4 | n.a.                  | n.a.           | n.a.         | n.a.               | n.a.                 | n.a.   |
| n.a.   | Component 5 | n.a.                  | n.a.           | n.a.         | n.a.               | n.a.                 | n.a.   |
| Total: |             |                       | 141,526        | 2288,091     | 100,00             | 100,00               |        |

File :D:\MSDChem\1\DATA\2001\JY-5-122-9.D  
Operator :  
Acquired : 9 Jan 2020 20:19 using AcqMethod SK3-30X.M  
Instrument : GC-MSD  
Sample Name: JY-5-122-9  
Misc Info :  
Vial Number: 44

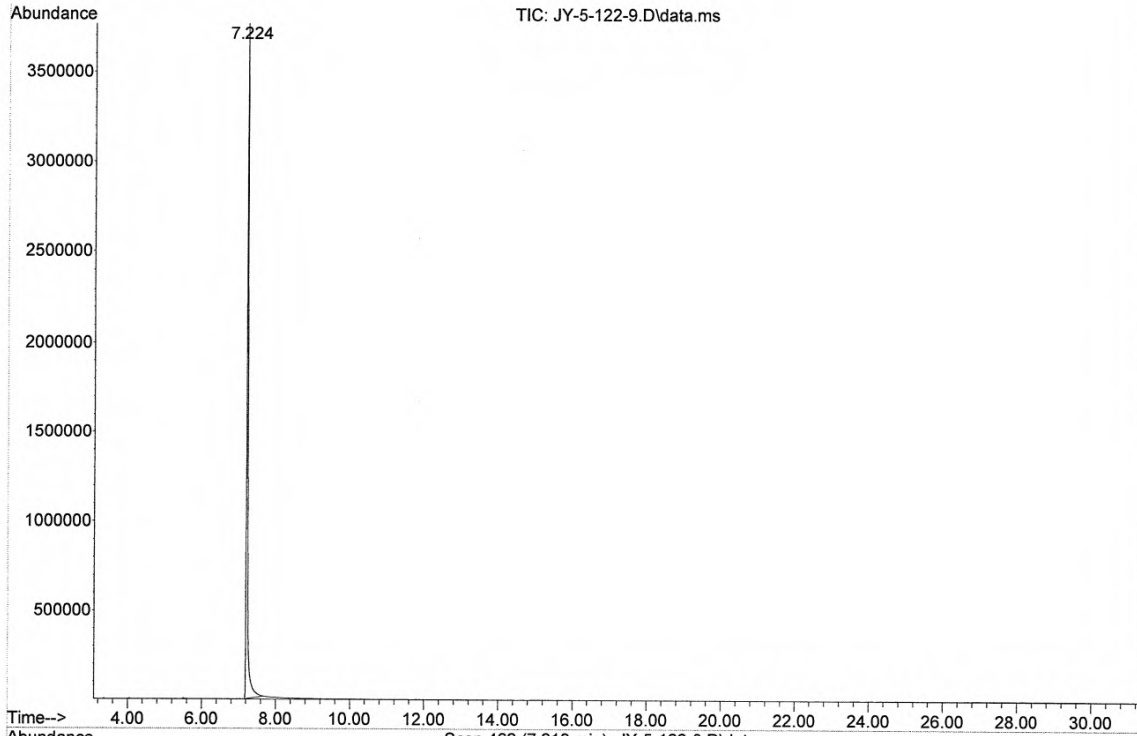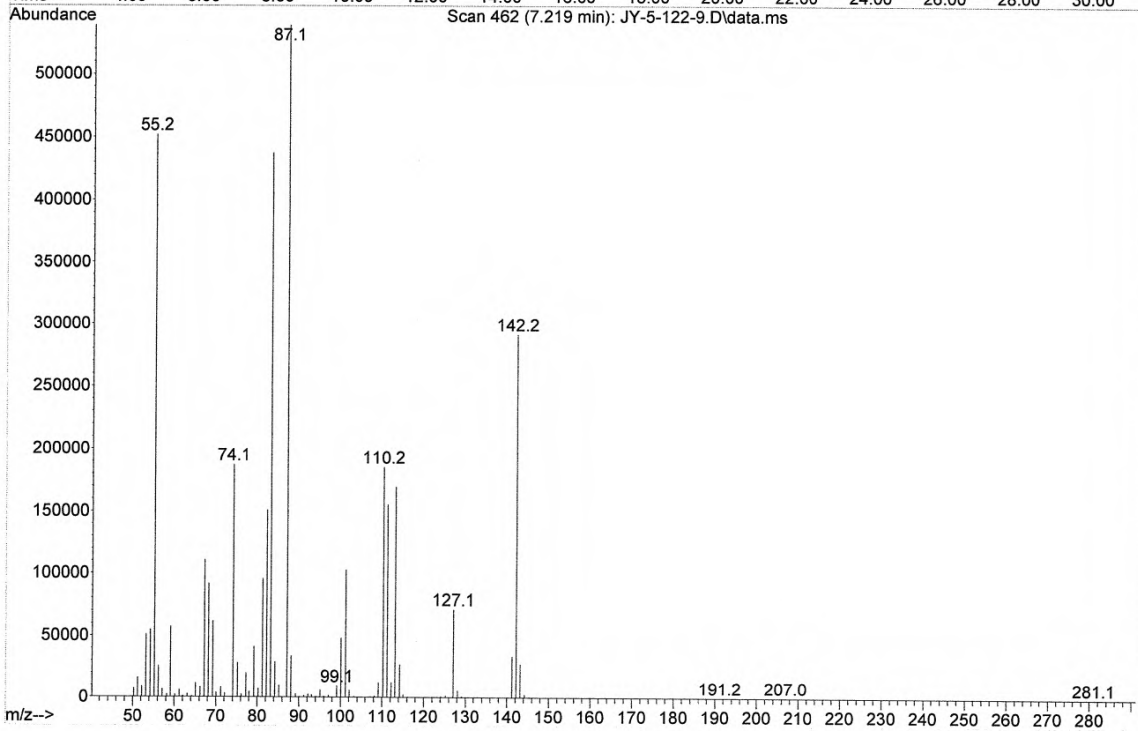



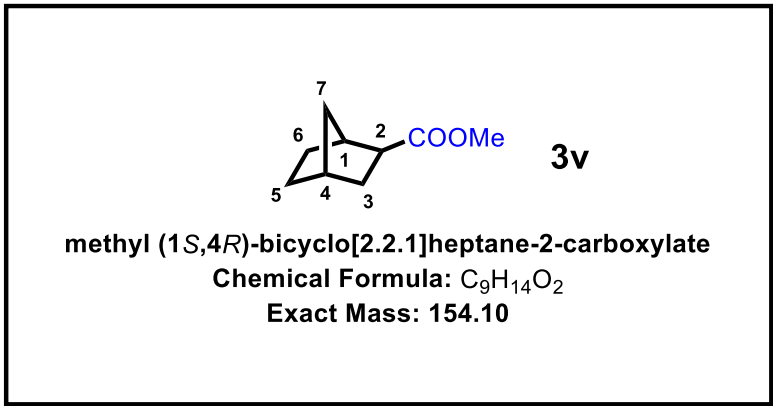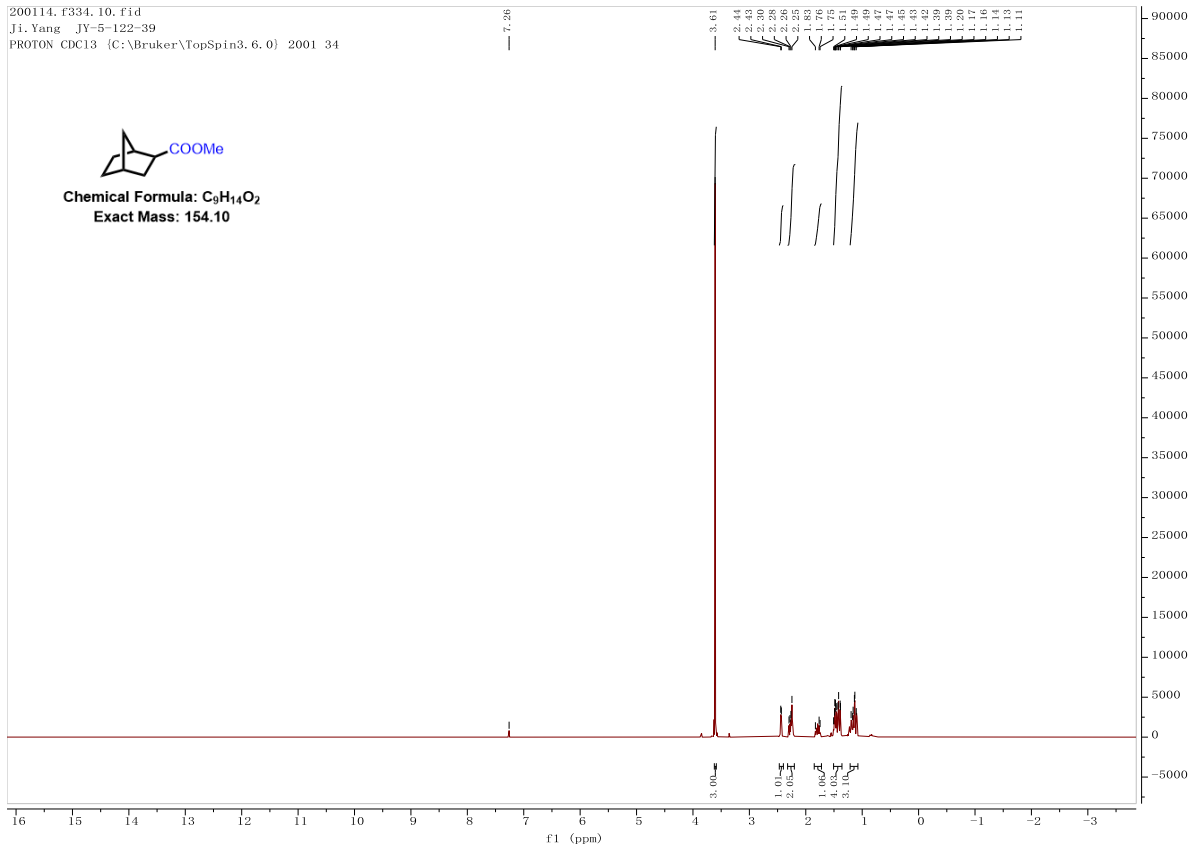

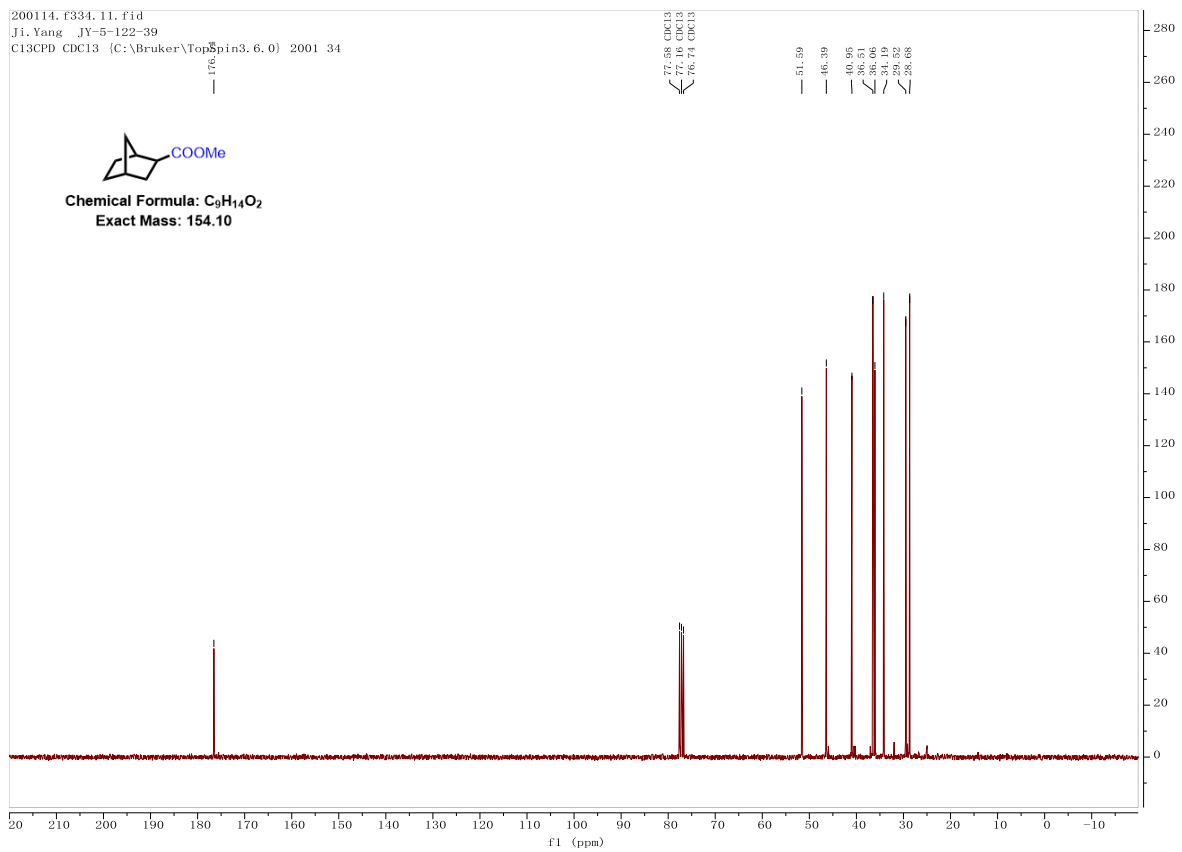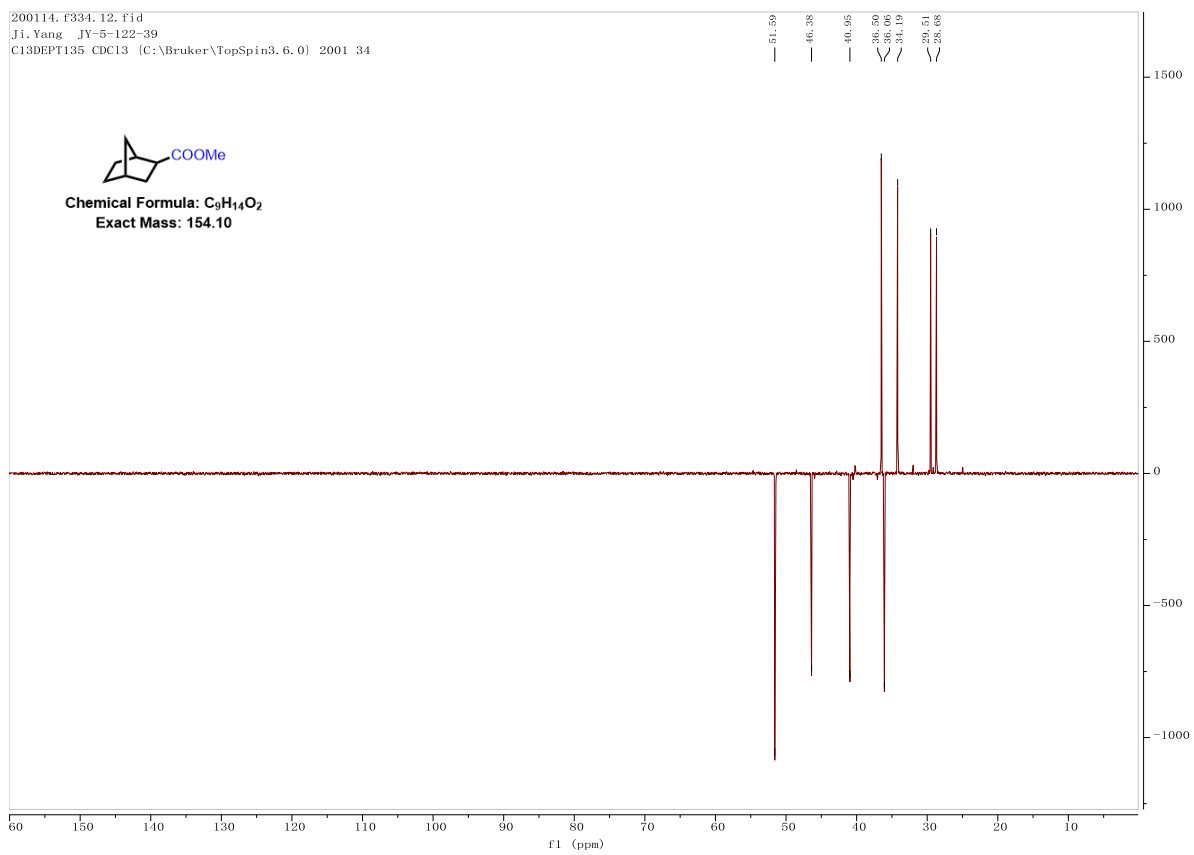

## Chromatogram and Results

### Injection Details

|                      |                   |                   |               |
|----------------------|-------------------|-------------------|---------------|
| Injection Name:      | JY-5-122-27-39-13 | Run Time (min):   | 40,00         |
| Vial Number:         | 37                | Injection Volume: | 2,00          |
| Injection Type:      | Unknown           | Channel:          | FrontDetector |
| Calibration Level:   |                   | Wavelength:       | n.a.          |
| Instrument Method:   | dong-40min        | Bandwidth:        | n.a.          |
| Processing Method:   | dong              | Dilution Factor:  | 1,0000        |
| Injection Date/Time: | 12.Jan.20 01:33   | Sample Weight:    | 1,0000        |

### Chromatogram

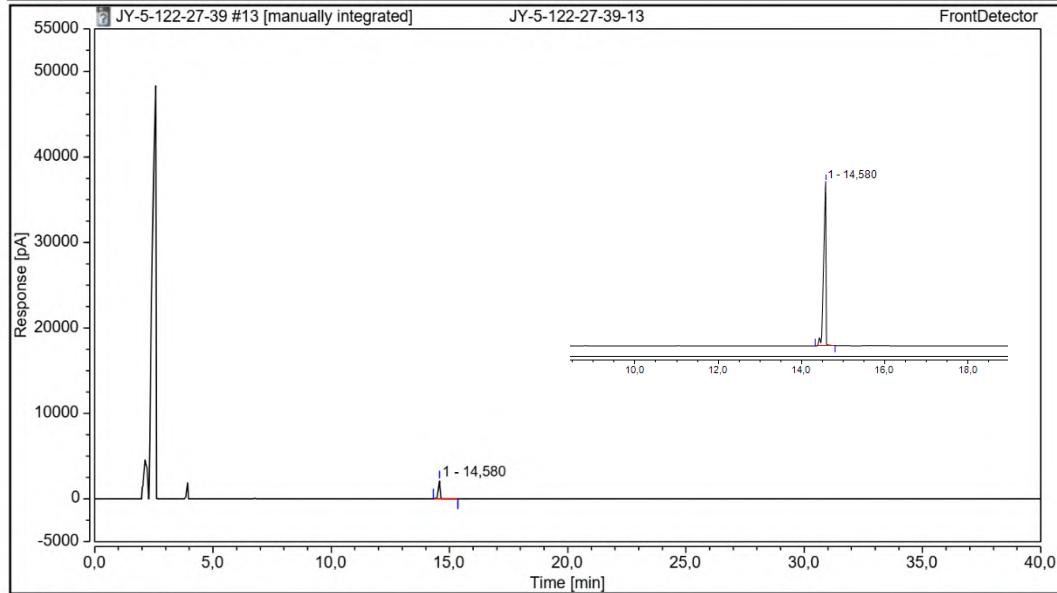

### Integration Results

| No.           | Peak Name   | Retention Time<br>min | Area<br>pA*min | Height<br>pA    | Relative Area<br>% | Relative Height<br>% | Amount |
|---------------|-------------|-----------------------|----------------|-----------------|--------------------|----------------------|--------|
| n.a.          | Component 2 | n.a.                  | n.a.           | n.a.            | n.a.               | n.a.                 | n.a.   |
| n.a.          | Component 3 | n.a.                  | n.a.           | n.a.            | n.a.               | n.a.                 | n.a.   |
| 1             |             | 14,580                | 129,613        | 2094,455        | 100,00             | 100,00               | n.a.   |
| n.a.          | Component 4 | n.a.                  | n.a.           | n.a.            | n.a.               | n.a.                 | n.a.   |
| n.a.          | Component 5 | n.a.                  | n.a.           | n.a.            | n.a.               | n.a.                 | n.a.   |
| <b>Total:</b> |             |                       | <b>129,613</b> | <b>2094,455</b> | <b>100,00</b>      | <b>100,00</b>        |        |

File :D:\MSDCHEM\1\DATA\2001\JY-5-122-39.D  
Operator :  
Acquired : 11 Jan 2020 23:42 using AcqMethod SK3-30X.M  
Instrument : GC-MSD  
Sample Name: JY-5-122-39  
Misc Info :  
Vial Number: 43

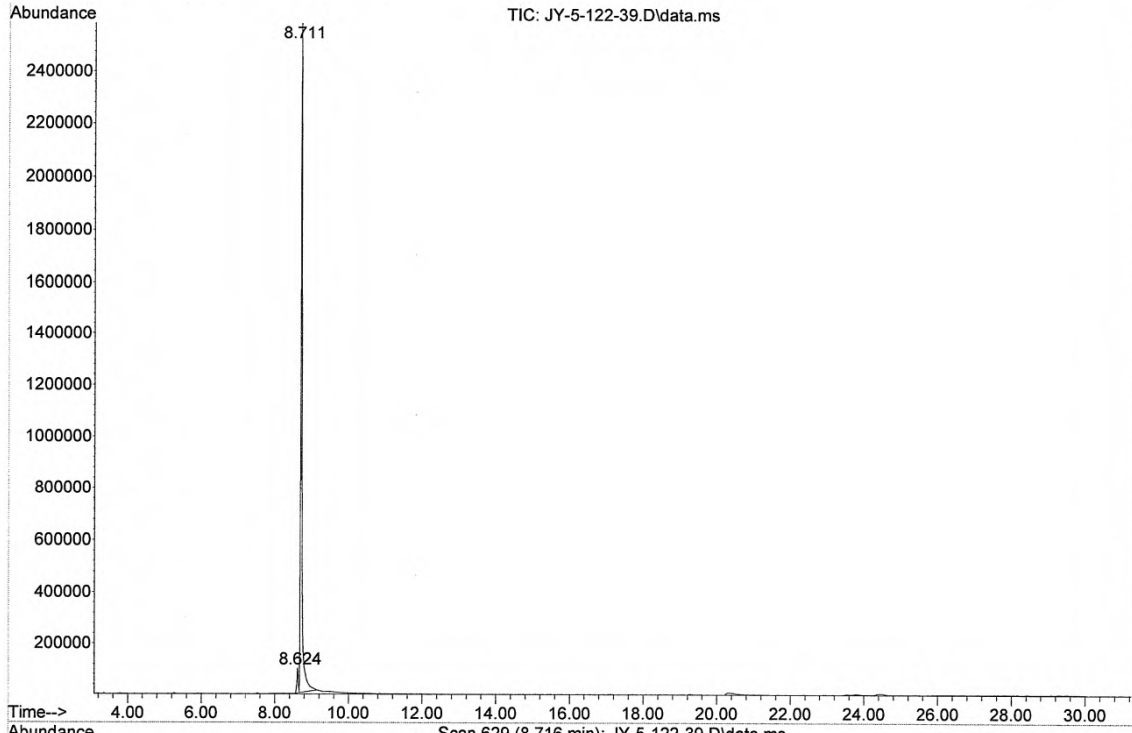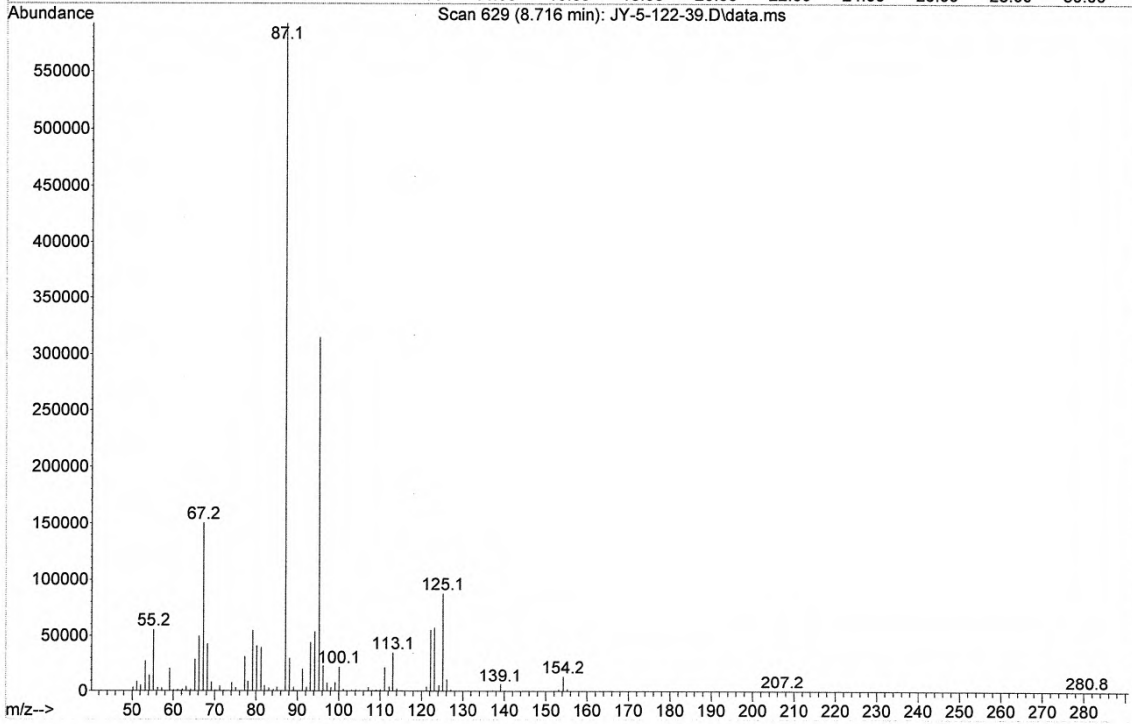

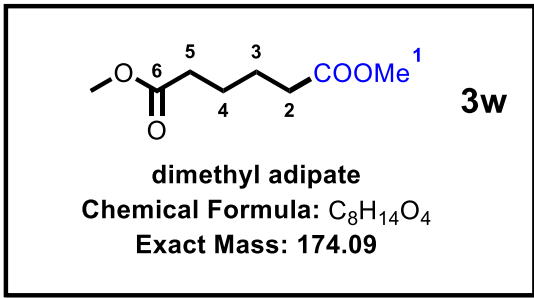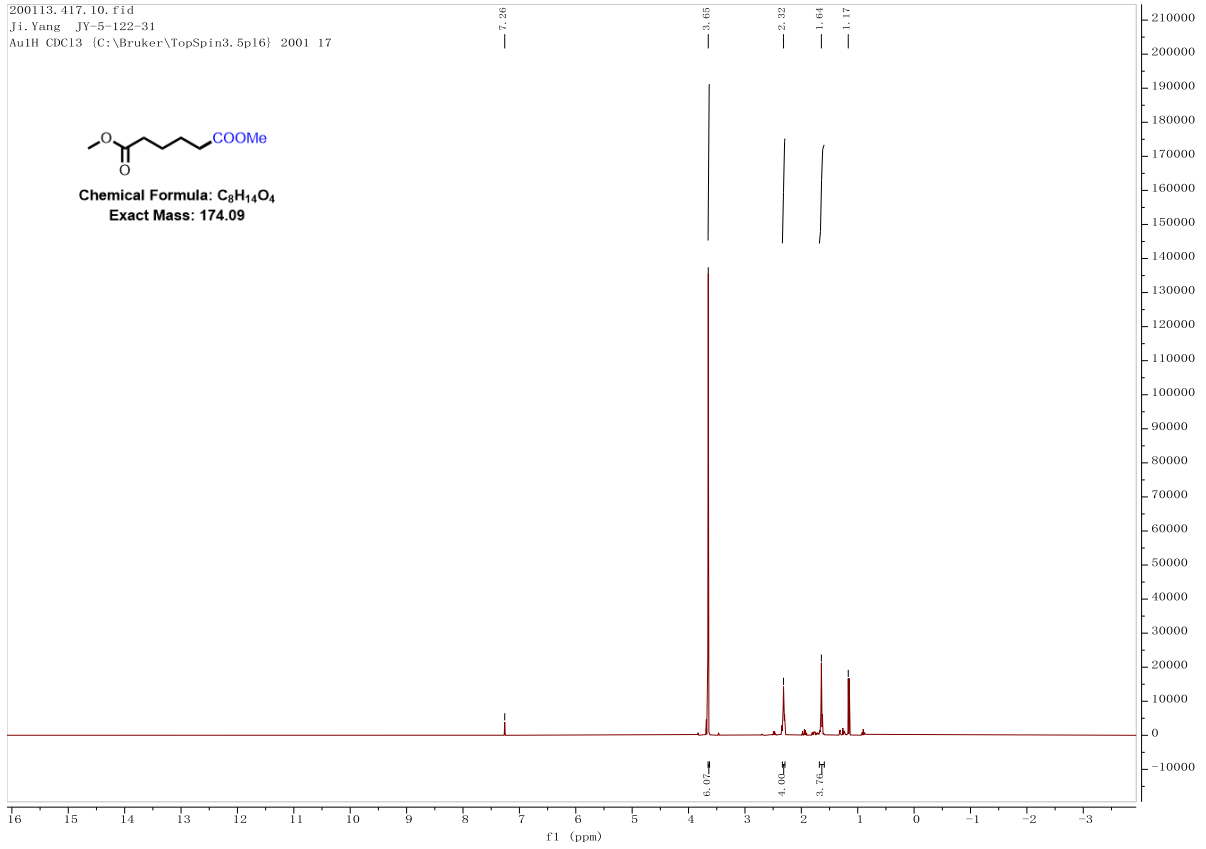

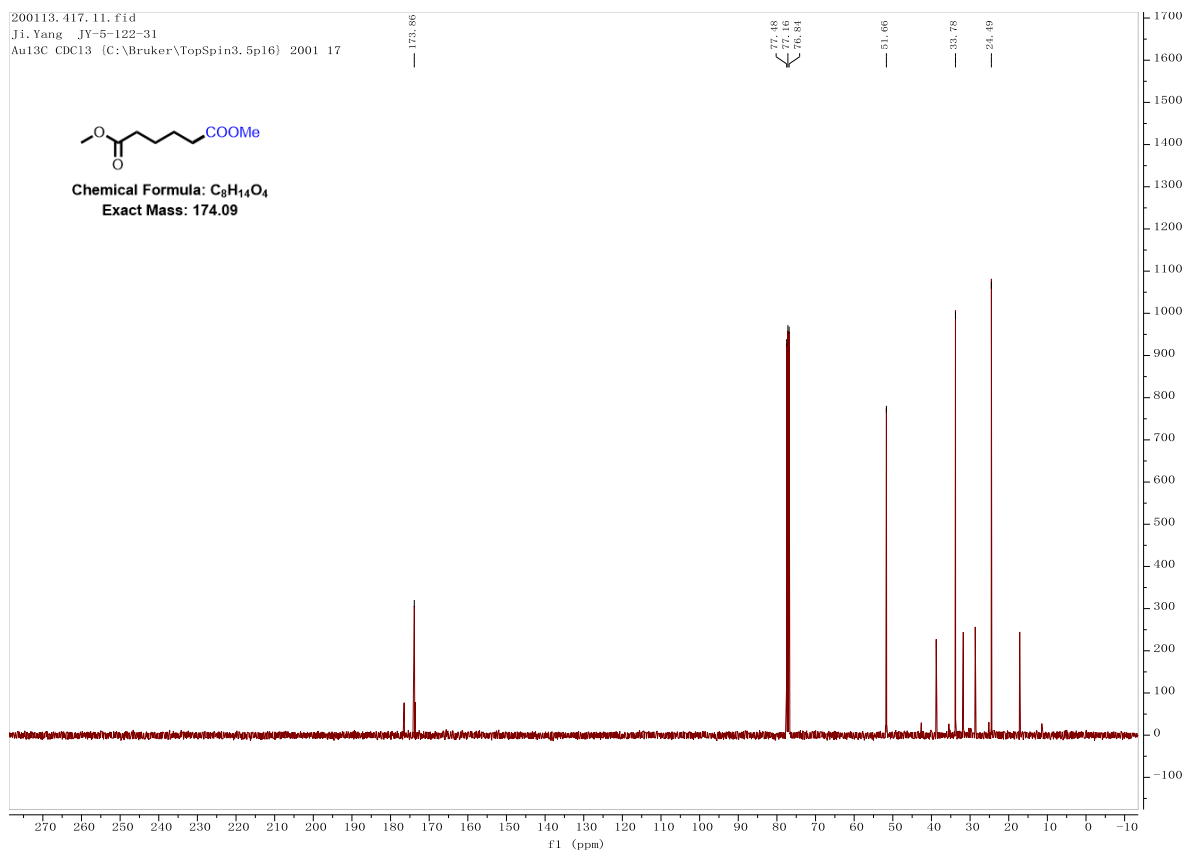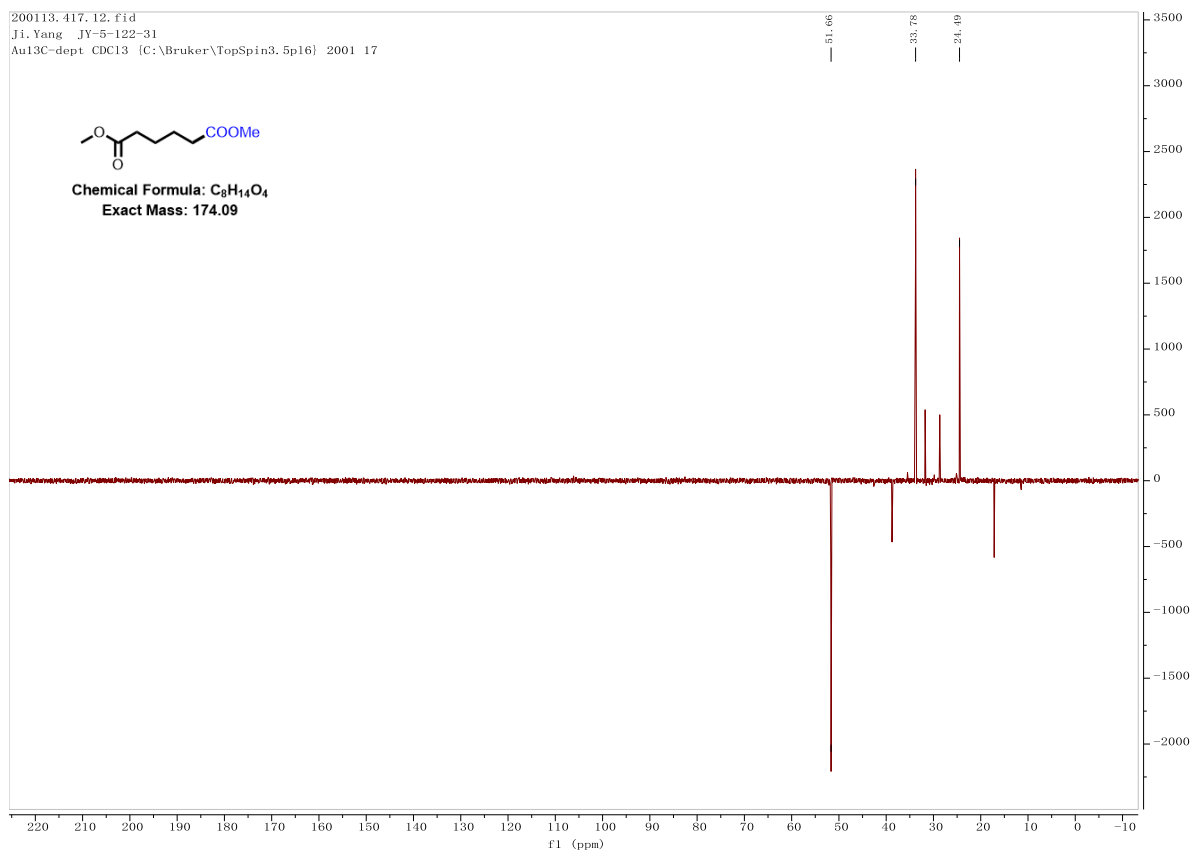

## Chromatogram and Results

| Injection Details    |                  |                   |               |
|----------------------|------------------|-------------------|---------------|
| Injection Name:      | JY-5-122-27-39-5 | Run Time (min):   | 40,00         |
| Vial Number:         | 29               | Injection Volume: | 2,00          |
| Injection Type:      | Unknown          | Channel:          | FrontDetector |
| Calibration Level:   |                  | Wavelength:       | n.a.          |
| Instrument Method:   | dong-40min       | Bandwidth:        | n.a.          |
| Processing Method:   | dong             | Dilution Factor:  | 1,0000        |
| Injection Date/Time: | 11.Jan.20 17:26  | Sample Weight:    | 1,0000        |

### Chromatogram

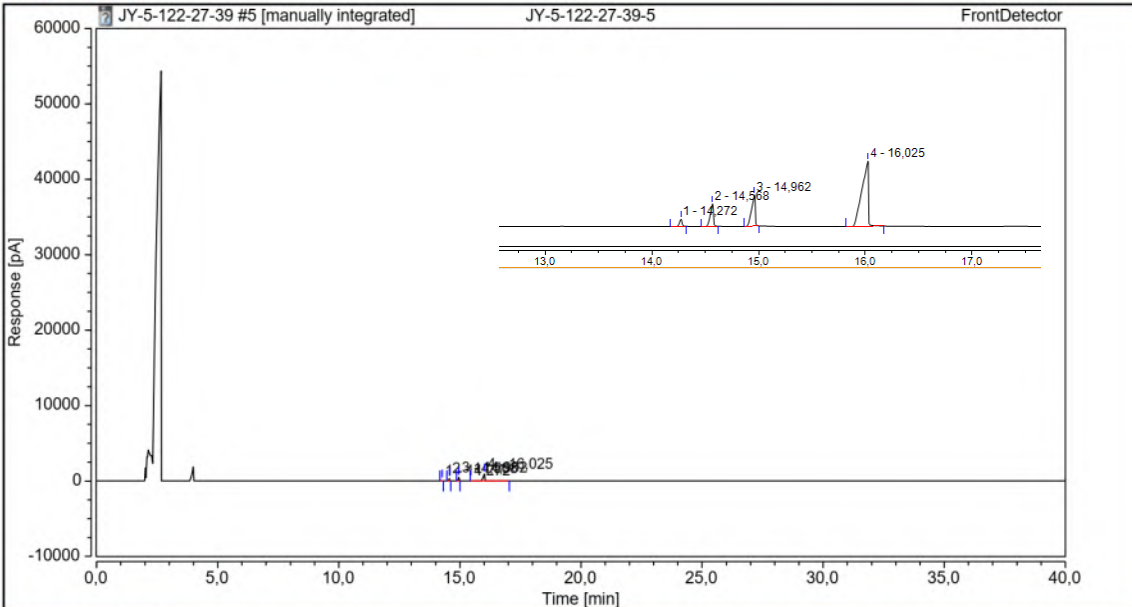

### Integration Results

| No.    | Peak Name   | Retention Time<br>min | Area<br>pA*min | Height<br>pA | Relative Area<br>% | Relative Height<br>% | Amount |
|--------|-------------|-----------------------|----------------|--------------|--------------------|----------------------|--------|
| n.a.   | Component 2 | n.a.                  | n.a.           | n.a.         | n.a.               | n.a.                 | n.a.   |
| n.a.   | Component 3 | n.a.                  | n.a.           | n.a.         | n.a.               | n.a.                 | n.a.   |
| 1      |             | 14,272                | 2,794          | 109,620      | 2,82               | 6,05                 | n.a.   |
| 2      |             | 14,568                | 10,701         | 322,992      | 10,81              | 17,83                | n.a.   |
| 3      |             | 14,962                | 17,399         | 445,334      | 17,57              | 24,59                | n.a.   |
| 4      |             | 16,025                | 68,141         | 933,392      | 68,81              | 51,53                | n.a.   |
| n.a.   | Component 4 | n.a.                  | n.a.           | n.a.         | n.a.               | n.a.                 | n.a.   |
| n.a.   | Component 5 | n.a.                  | n.a.           | n.a.         | n.a.               | n.a.                 | n.a.   |
| Total: |             |                       | 99,035         | 1811,338     | 100,00             | 100,00               |        |

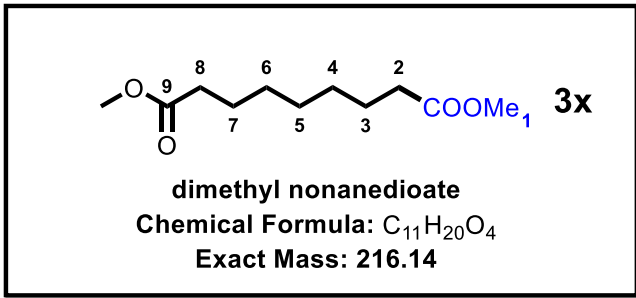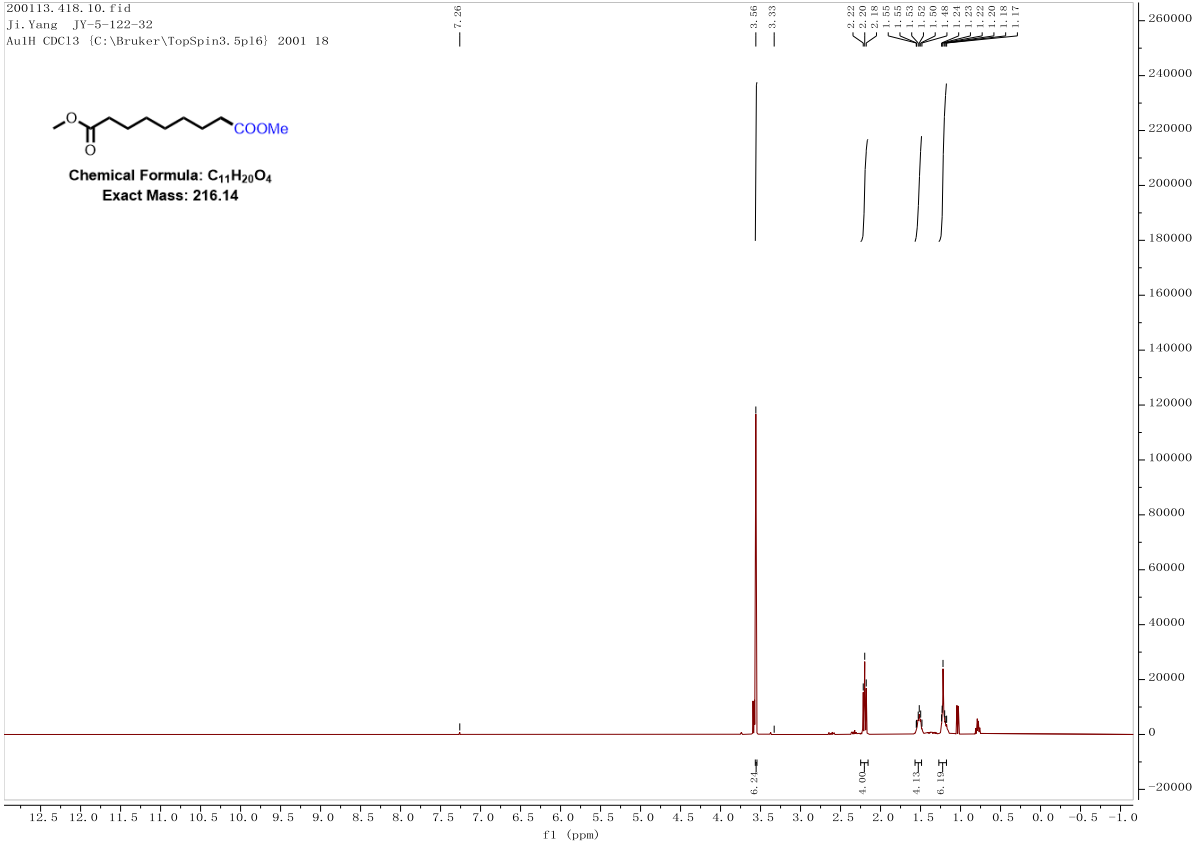



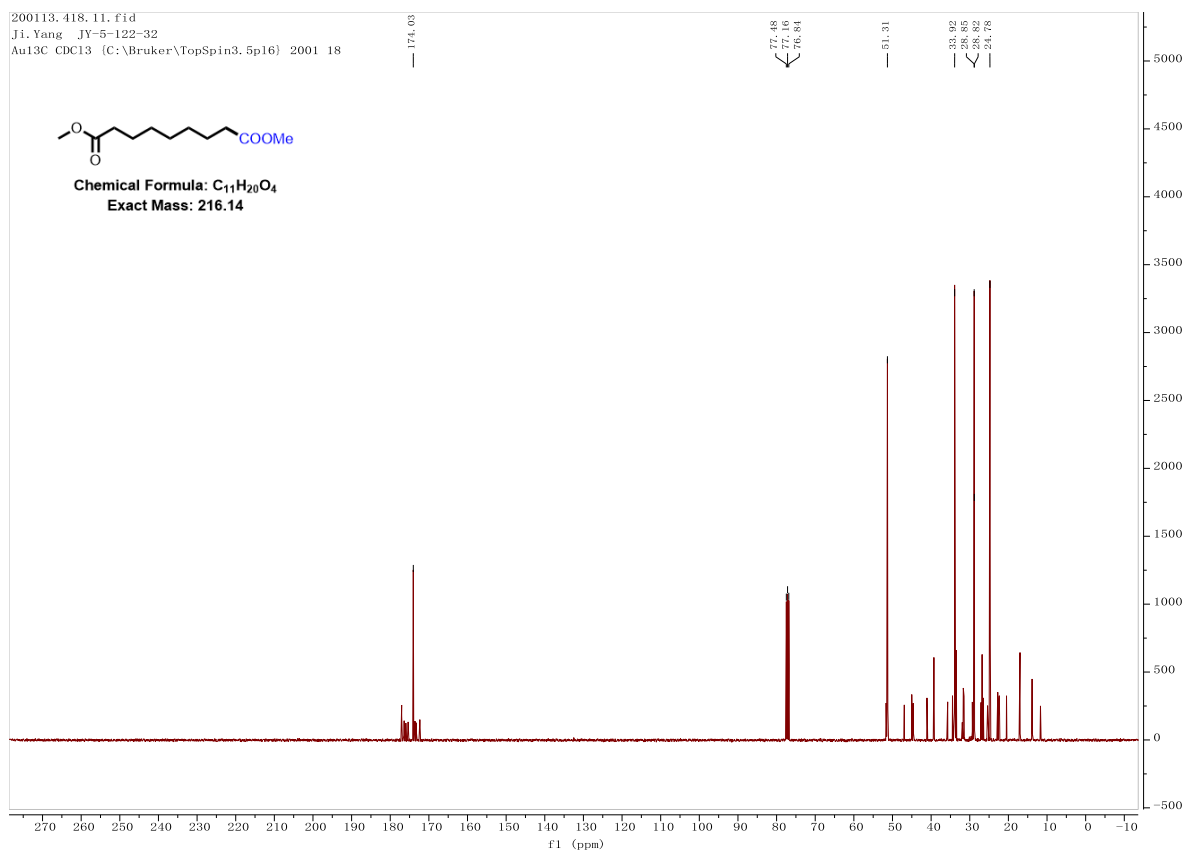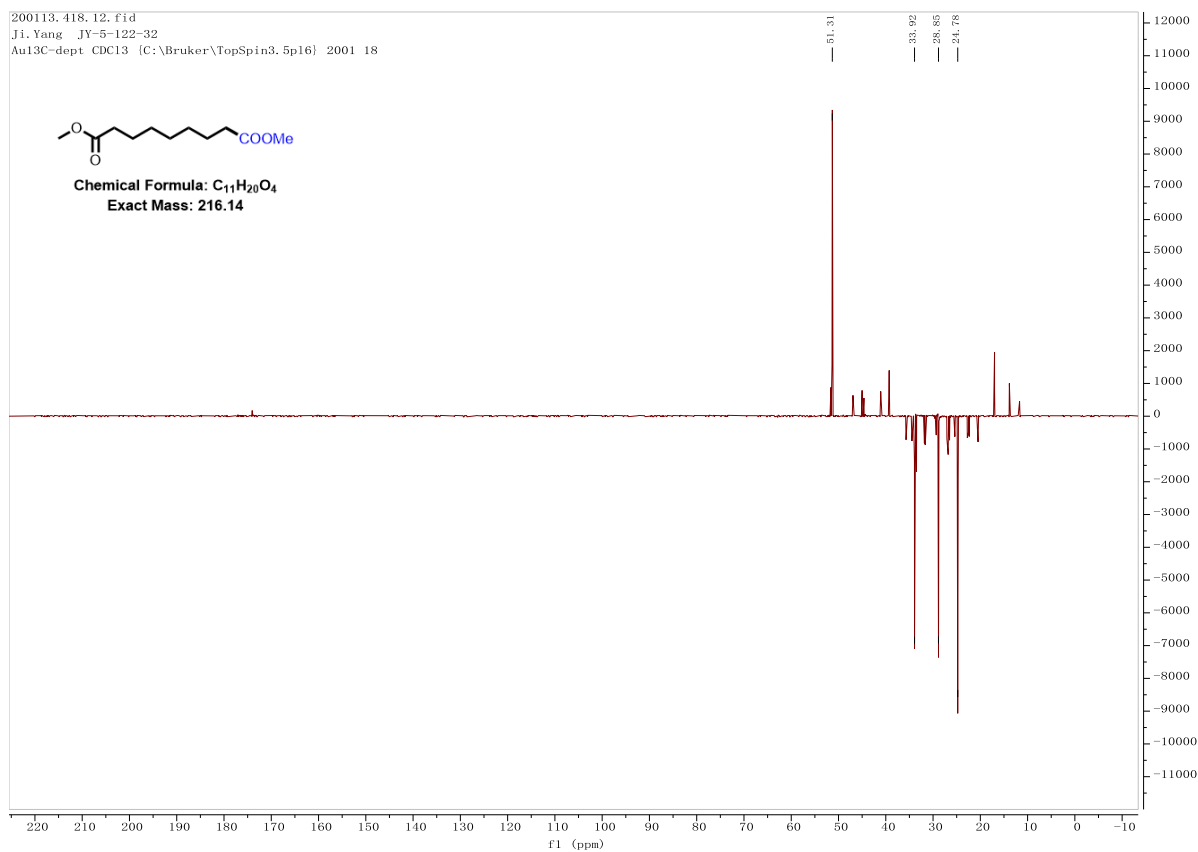

## Chromatogram and Results

| Injection Details    |                  |                         |
|----------------------|------------------|-------------------------|
| Injection Name:      | JY-5-122-27-39-6 | Run Time (min): 40,00   |
| Vial Number:         | 30               | Injection Volume: 2,00  |
| Injection Type:      | Unknown          | Channel: FrontDetector  |
| Calibration Level:   |                  | Wavelength: n.a.        |
| Instrument Method:   | dong-40min       | Bandwidth: n.a.         |
| Processing Method:   | dong             | Dilution Factor: 1,0000 |
| Injection Date/Time: | 11.Jan.20 18:27  | Sample Weight: 1,0000   |

### Chromatogram

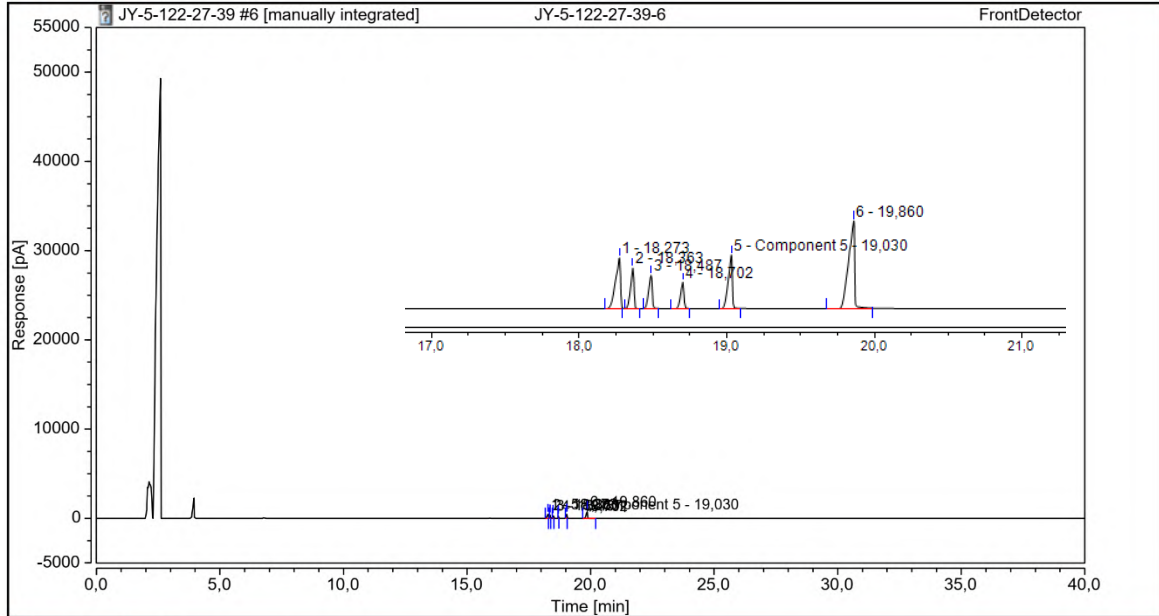

### Integration Results

| No.    | Peak Name   | Retention Time<br>min | Area<br>pA*min | Height<br>pA | Relative Area<br>% | Relative Height<br>% | Amount |
|--------|-------------|-----------------------|----------------|--------------|--------------------|----------------------|--------|
| n.a.   | Component 2 | n.a.                  | n.a.           | n.a.         | n.a.               | n.a.                 | n.a.   |
| n.a.   | Component 3 | n.a.                  | n.a.           | n.a.         | n.a.               | n.a.                 | n.a.   |
| n.a.   | Component 4 | n.a.                  | n.a.           | n.a.         | n.a.               | n.a.                 | n.a.   |
| 1      |             | 18,273                | 16,605         | 426,289      | 19,31              | 17,59                | n.a.   |
| 2      |             | 18,363                | 7,982          | 329,251      | 9,28               | 13,58                | n.a.   |
| 3      |             | 18,487                | 7,502          | 277,608      | 8,73               | 11,45                | n.a.   |
| 4      |             | 18,702                | 4,700          | 205,873      | 5,47               | 8,49                 | n.a.   |
| 5      | Component 5 | 19,030                | 13,365         | 444,069      | 15,55              | 18,32                | n.a.   |
| 6      |             | 19,860                | 35,817         | 740,961      | 41,66              | 30,57                | n.a.   |
| Total: |             |                       | 85,970         | 2424,051     | 100,00             | 100,00               |        |

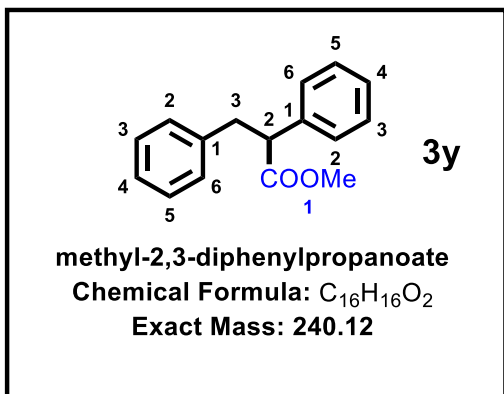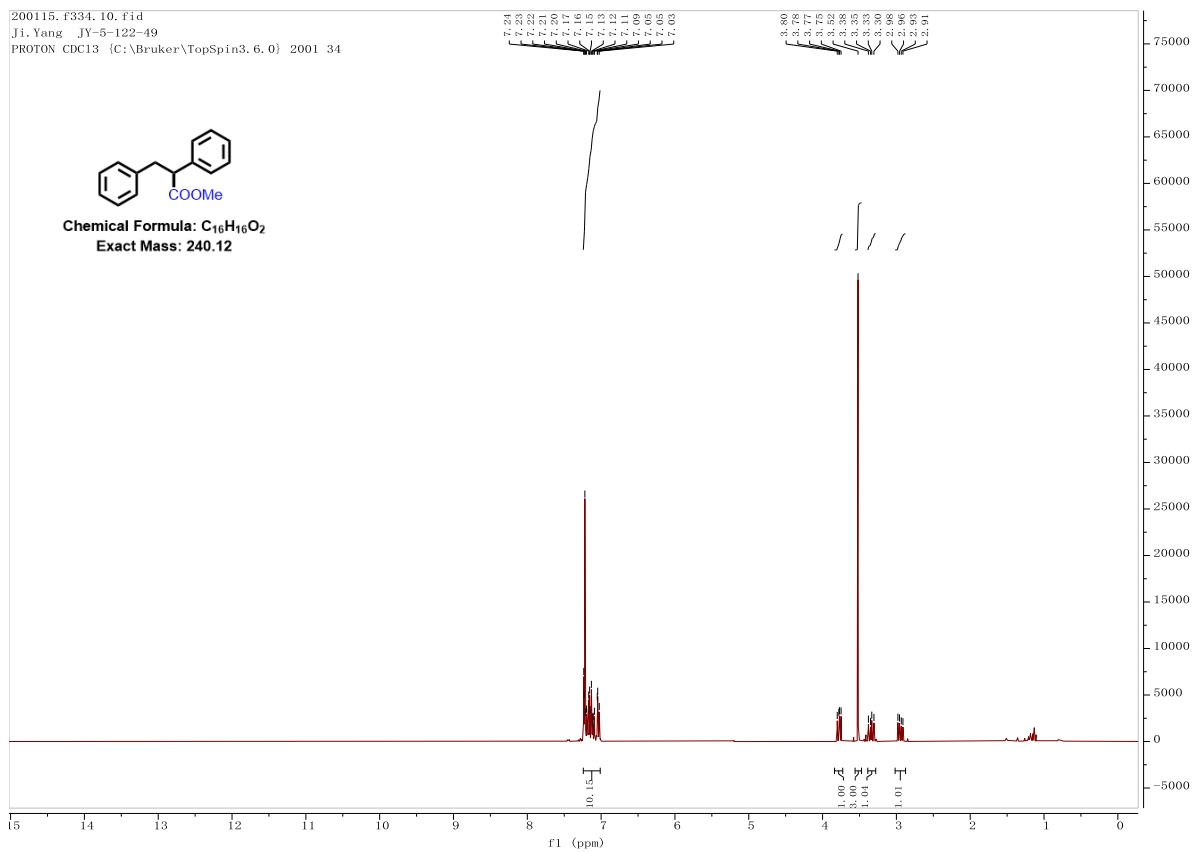

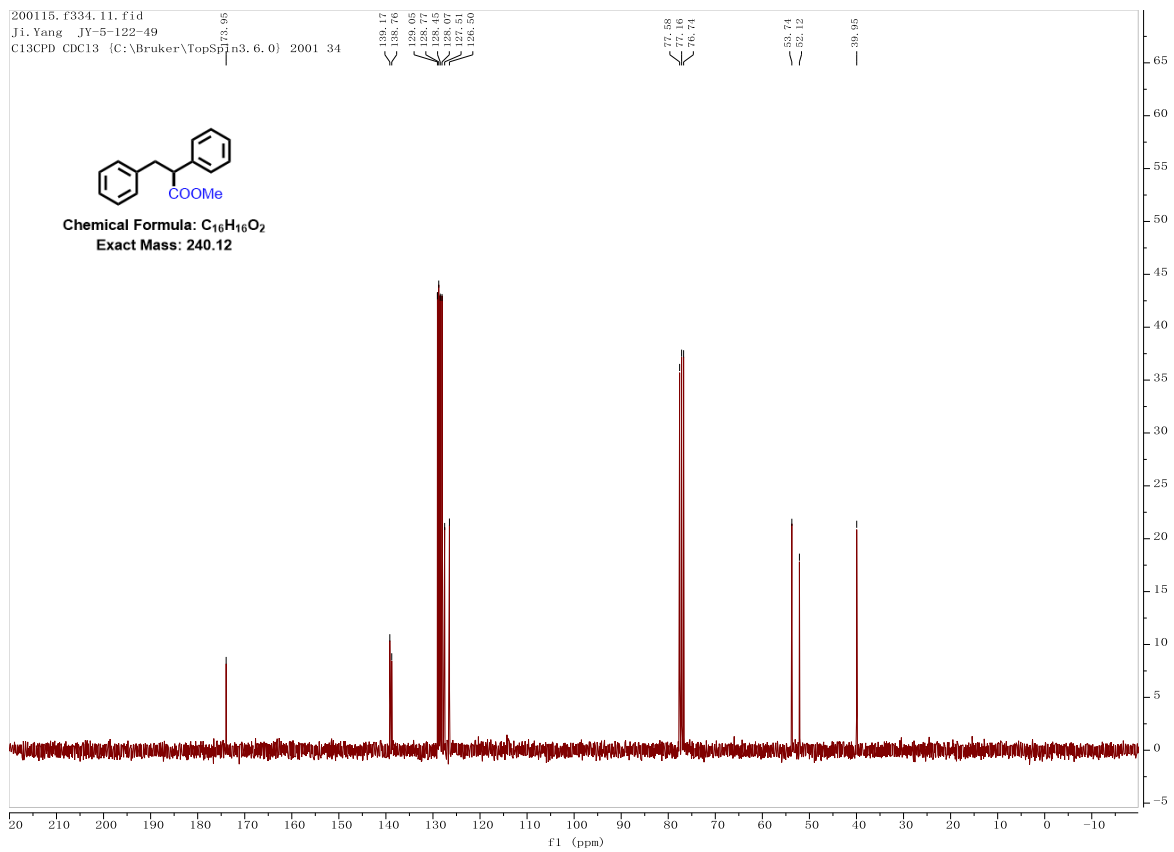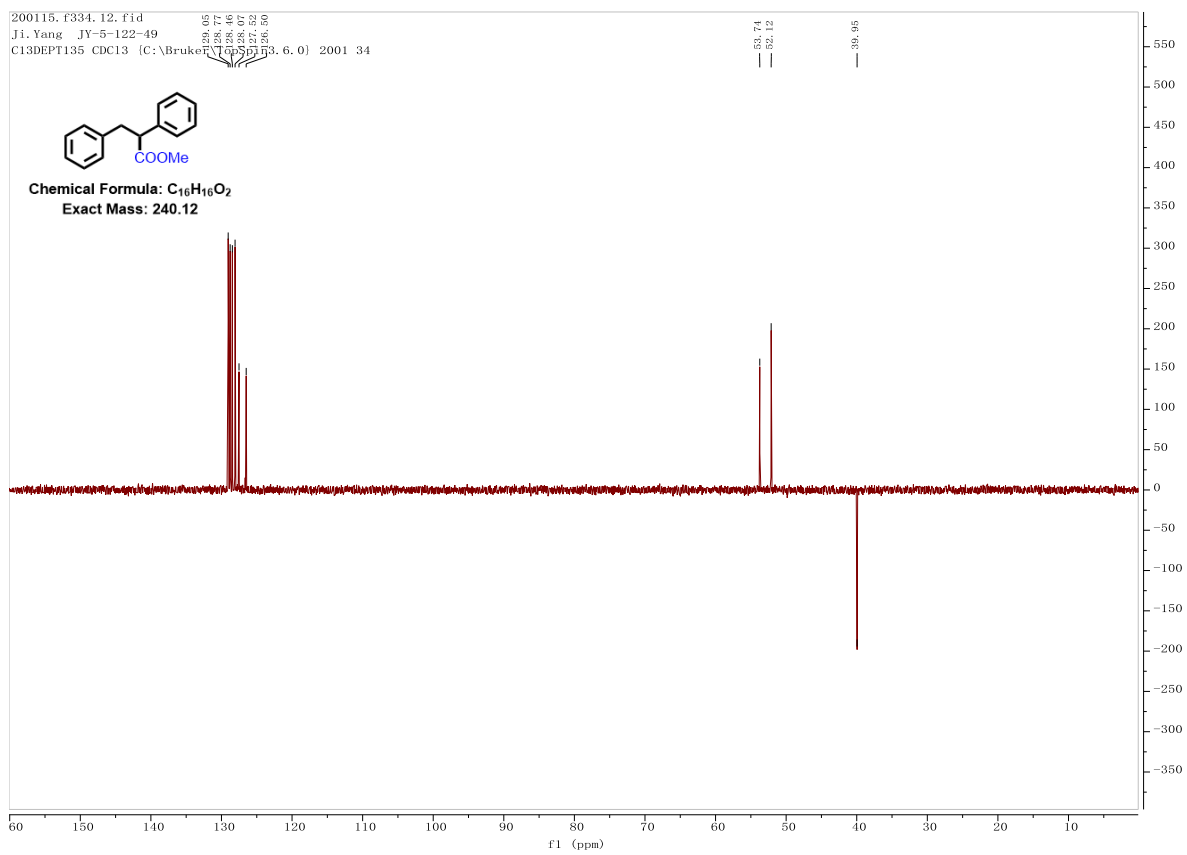

### Chromatogram and Results

| Injection Details    |                  |                   |               |
|----------------------|------------------|-------------------|---------------|
| Injection Name:      | JY-5-122-27-39-9 | Run Time (min):   | 40,00         |
| Vial Number:         | 33               | Injection Volume: | 2,00          |
| Injection Type:      | Unknown          | Channel:          | FrontDetector |
| Calibration Level:   |                  | Wavelength:       | n.a.          |
| Instrument Method:   | dong-40min       | Bandwidth:        | n.a.          |
| Processing Method:   | dong             | Dilution Factor:  | 1,0000        |
| Injection Date/Time: | 11.Jan.20 21:30  | Sample Weight:    | 1,0000        |

#### Chromatogram

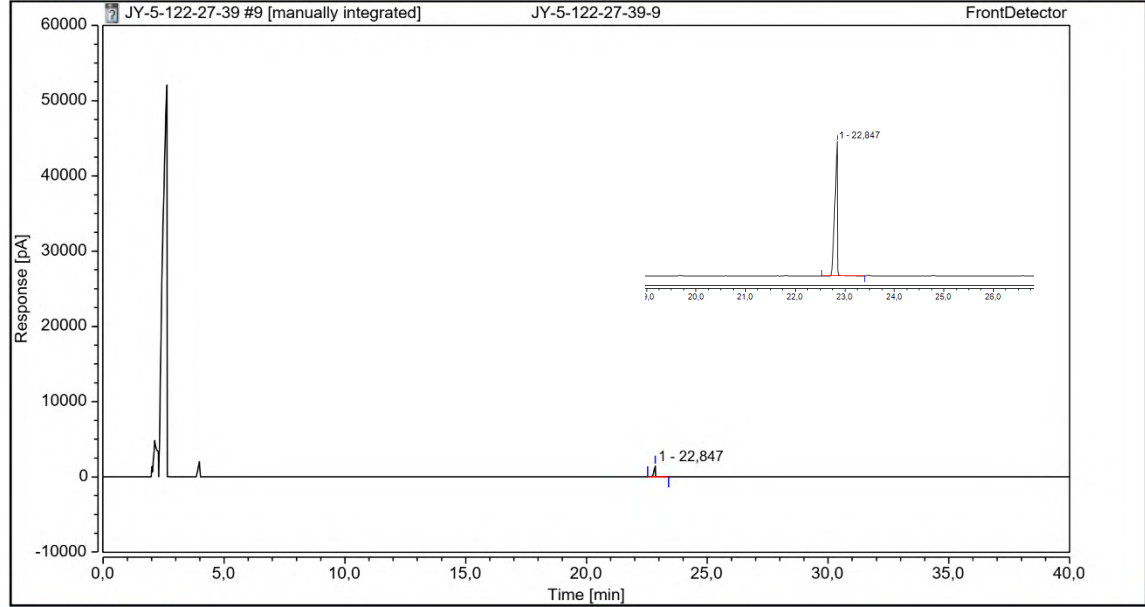

#### Integration Results

| No.    | Peak Name   | Retention Time<br>min | Area<br>pA*min | Height<br>pA | Relative Area<br>% | Relative Height<br>% | Amount |
|--------|-------------|-----------------------|----------------|--------------|--------------------|----------------------|--------|
| n.a.   | Component 2 | n.a.                  | n.a.           | n.a.         | n.a.               | n.a.                 | n.a.   |
| n.a.   | Component 3 | n.a.                  | n.a.           | n.a.         | n.a.               | n.a.                 | n.a.   |
| n.a.   | Component 4 | n.a.                  | n.a.           | n.a.         | n.a.               | n.a.                 | n.a.   |
| n.a.   | Component 5 | n.a.                  | n.a.           | n.a.         | n.a.               | n.a.                 | n.a.   |
| 1      |             | 22,847                | 87,088         | 1411,970     | 100,00             | 100,00               | n.a.   |
| Total: |             |                       | 87,088         | 1411,970     | 100,00             | 100,00               |        |

File :D:\MSDChem\1\DATA\2001\JY-5-122-35.D  
Operator :  
Acquired : 11 Jan 2020 21:07 using AcqMethod SK3-30X.M  
Instrument : GC-MSD  
Sample Name: JY-5-122-35  
Misc Info :  
Vial Number: 39

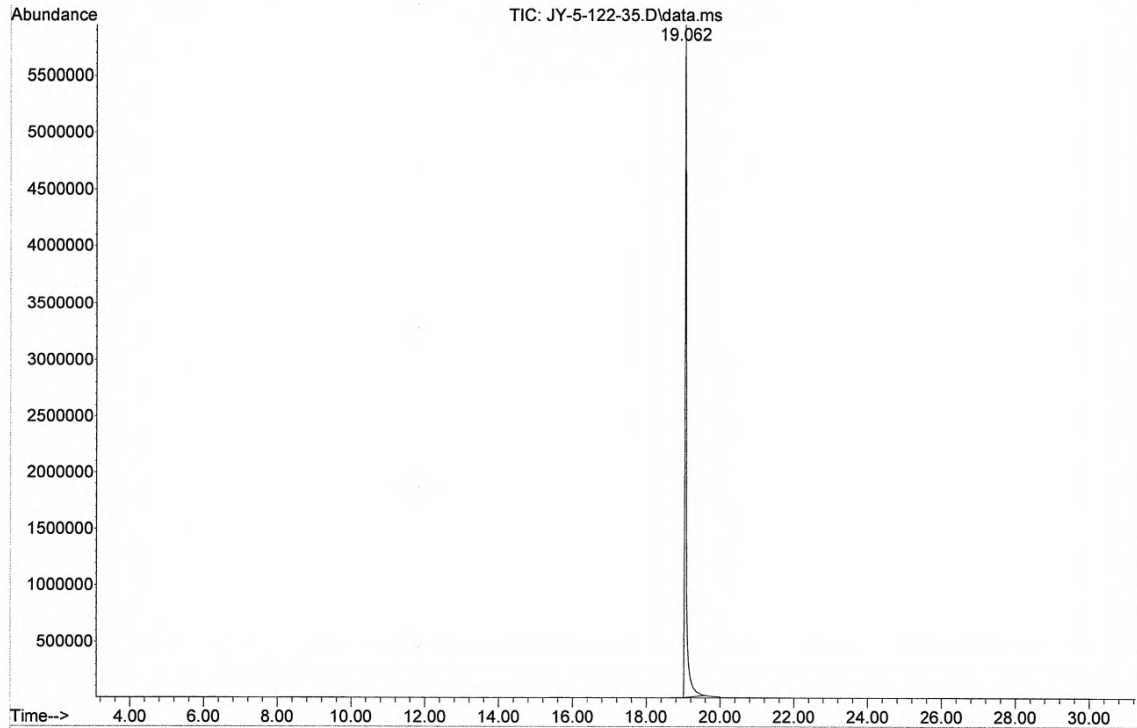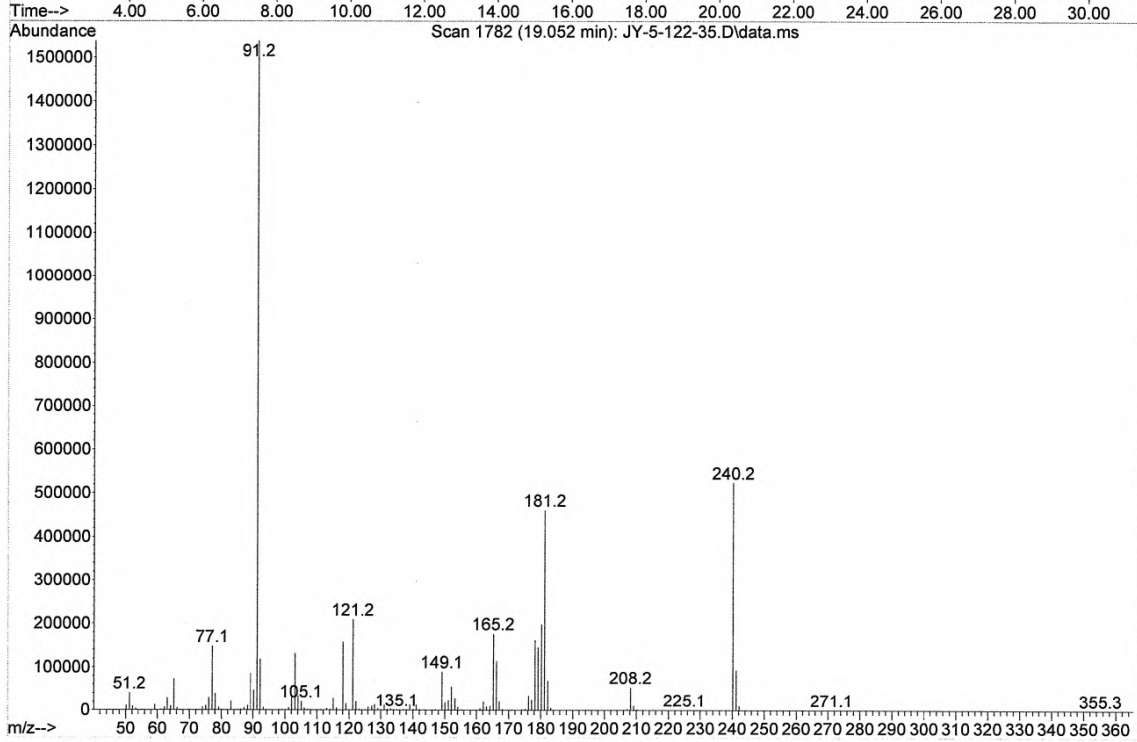

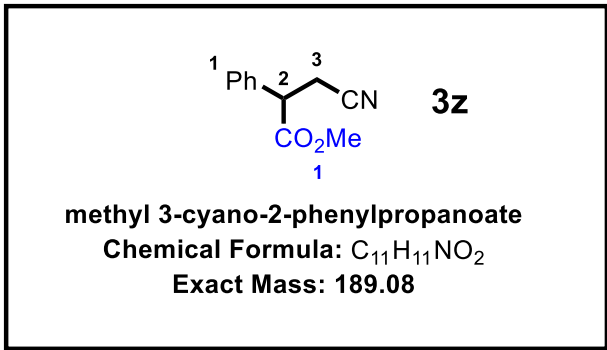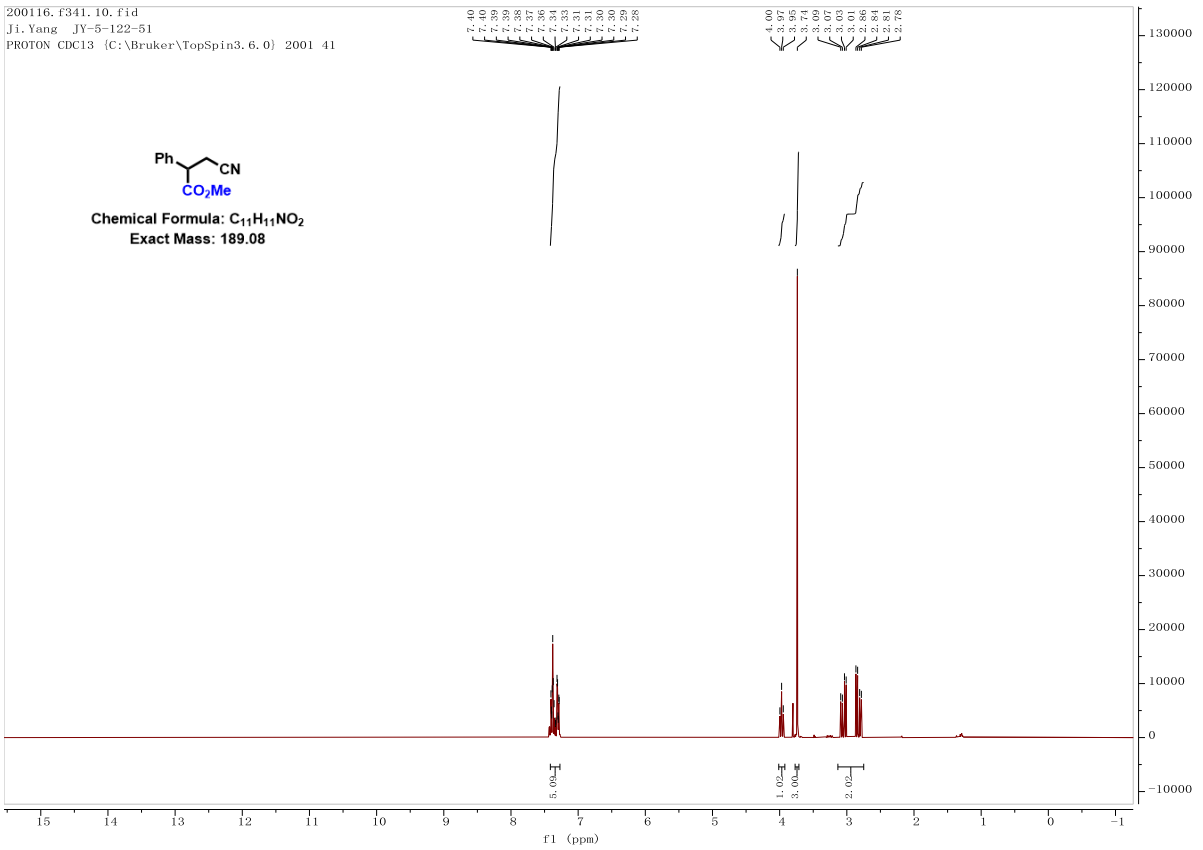

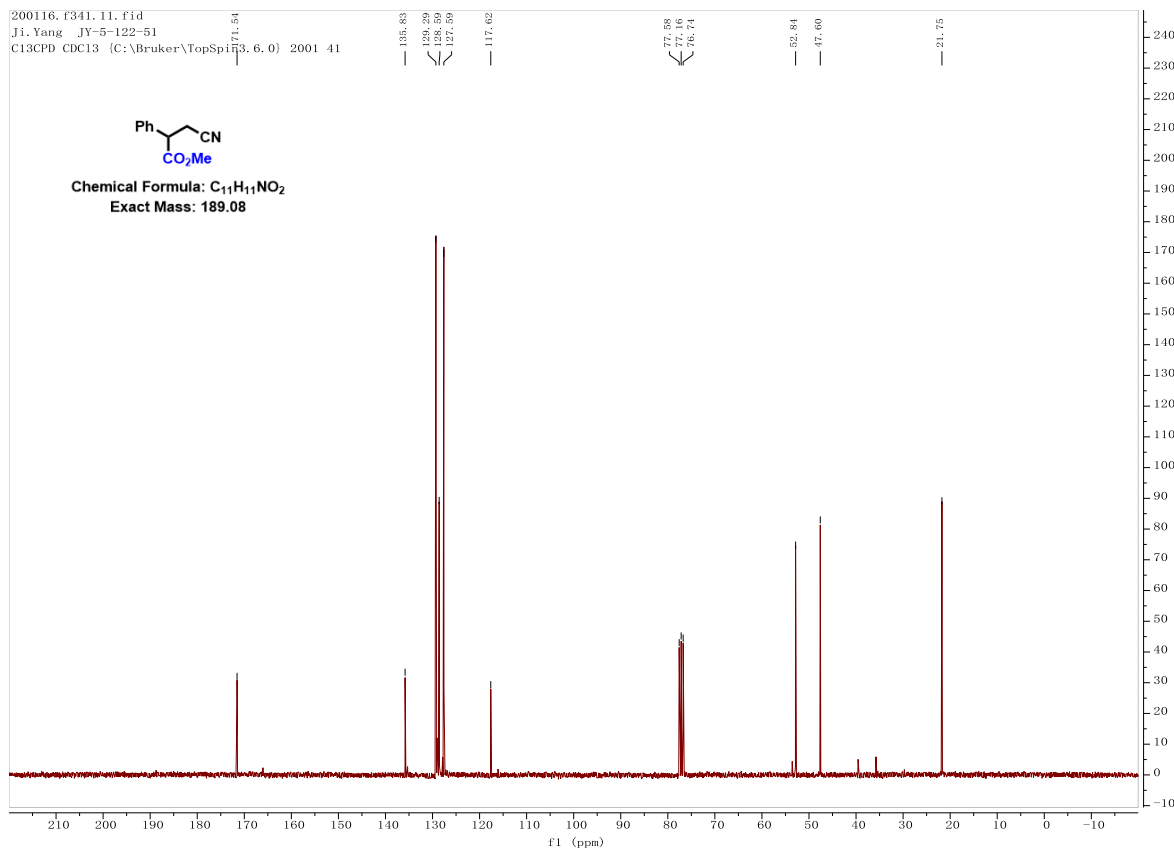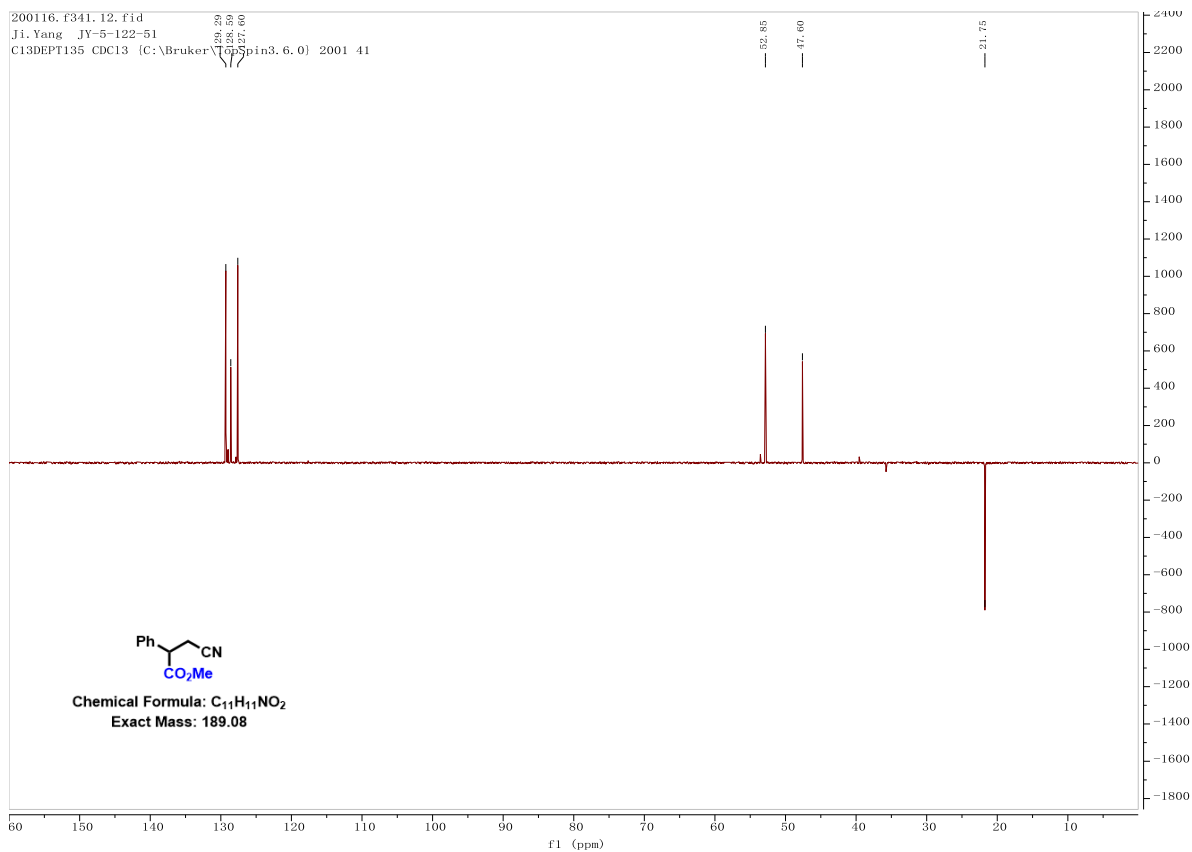



## Chromatogram and Results

| Injection Details    |                 |                   |               |
|----------------------|-----------------|-------------------|---------------|
| Injection Name:      | JY-5-122-43-45  | Run Time (min):   | 40,00         |
| Vial Number:         | 74              | Injection Volume: | 2,00          |
| Injection Type:      | Unknown         | Channel:          | FrontDetector |
| Calibration Level:   |                 | Wavelength:       | n.a.          |
| Instrument Method:   | dong-40min      | Bandwidth:        | n.a.          |
| Processing Method:   | dong            | Dilution Factor:  | 1,0000        |
| Injection Date/Time: | 13.Jan.20 15:32 | Sample Weight:    | 1,0000        |

### Chromatogram

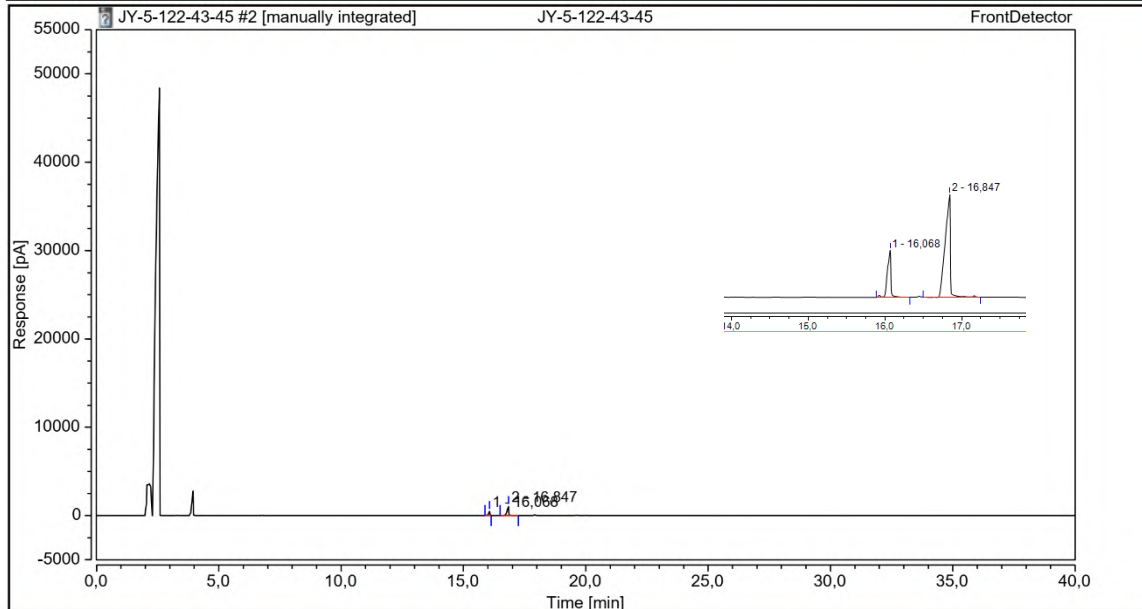

### Integration Results

| No.    | Peak Name   | Retention Time<br>min | Area<br>pA*min | Height<br>pA | Relative Area<br>% | Relative Height<br>% | Amount |
|--------|-------------|-----------------------|----------------|--------------|--------------------|----------------------|--------|
| n.a.   | Component 2 | n.a.                  | n.a.           | n.a.         | n.a.               | n.a.                 | n.a.   |
| n.a.   | Component 3 | n.a.                  | n.a.           | n.a.         | n.a.               | n.a.                 | n.a.   |
| 1      |             | 16,068                | 22,163         | 451,922      | 22,29              | 31,14                | n.a.   |
| 2      |             | 16,847                | 77,249         | 999,182      | 77,71              | 68,86                | n.a.   |
| n.a.   | Component 4 | n.a.                  | n.a.           | n.a.         | n.a.               | n.a.                 | n.a.   |
| n.a.   | Component 5 | n.a.                  | n.a.           | n.a.         | n.a.               | n.a.                 | n.a.   |
| Total: |             |                       | 99,412         | 1451,105     | 100,00             | 100,00               |        |

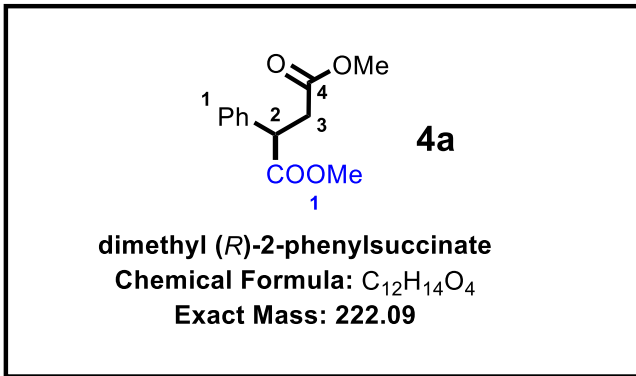

200115.f335.10.fid  
 Ji.Yang JY5-122-50  
 PROTON CDCl<sub>3</sub> (C:\Bruker\TopSpin3.6.0} 2001 35

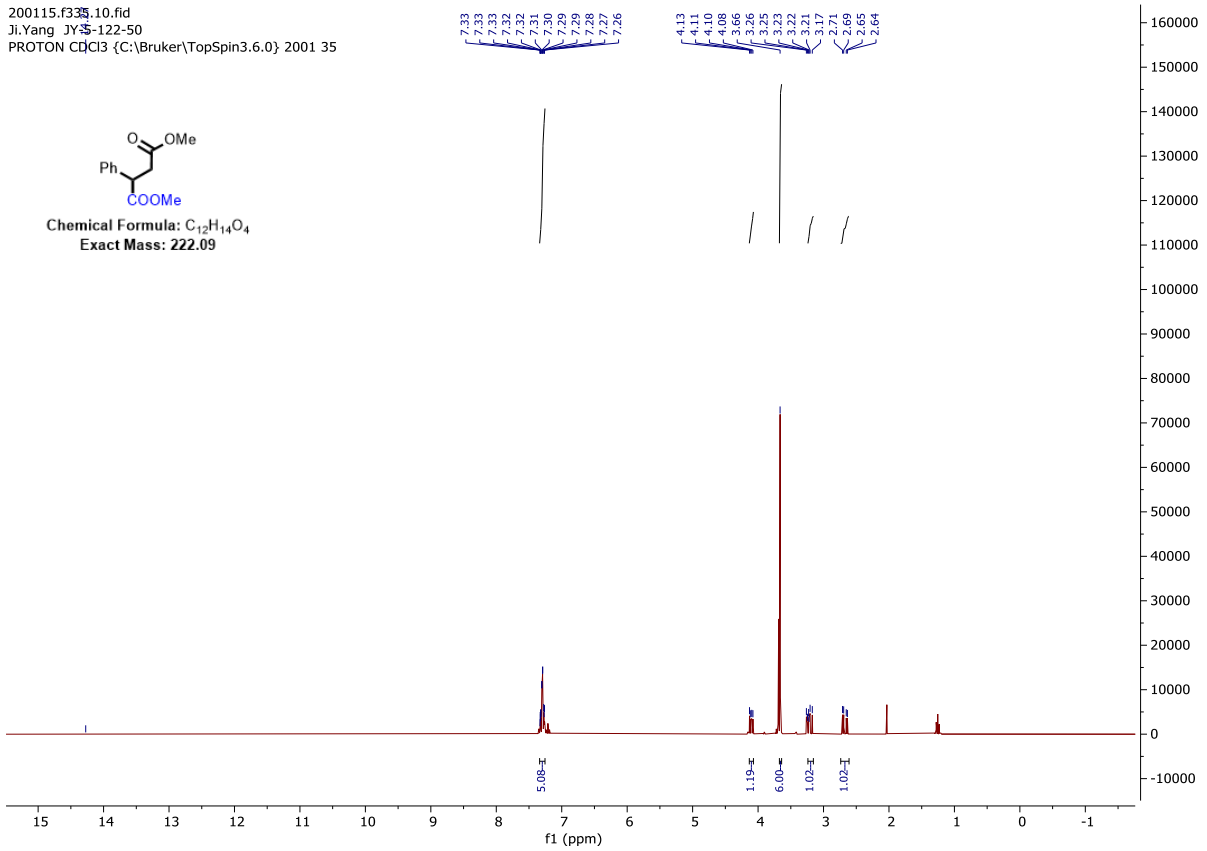

200115.f335.11.fid  
Ji.Yang JY-5-122-50  
C13CPD CDCl3 {C:\Bruker\TopSpin3.6.0} 2001 35

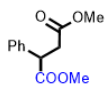

Chemical Formula: C<sub>12</sub>H<sub>14</sub>O<sub>4</sub>  
Exact Mass: 222.09

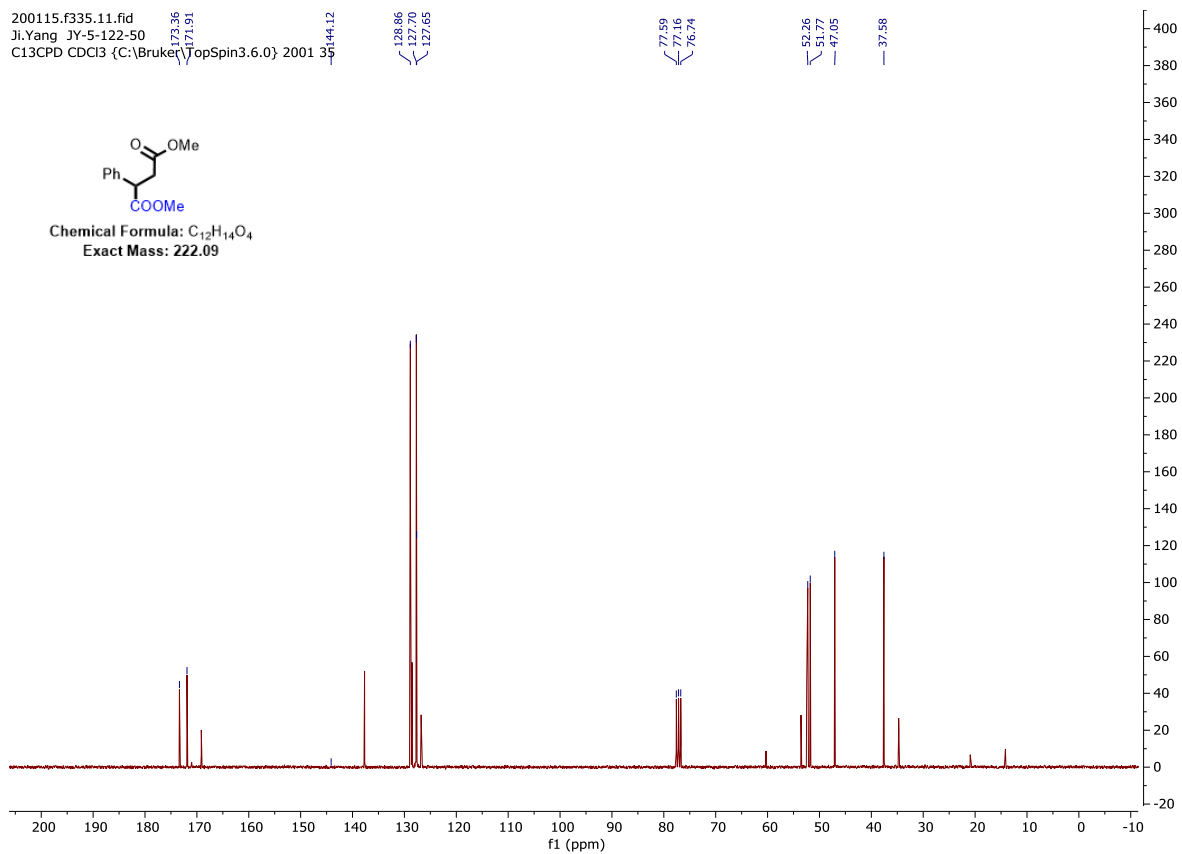

200115.f335.12.fid  
Ji.Yang JY-5-122-50  
C13DEPT135 CDCl3 {C:\Bruker\TopSpin3.6.0} 2001 35

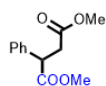

Chemical Formula: C<sub>12</sub>H<sub>14</sub>O<sub>4</sub>  
Exact Mass: 222.09

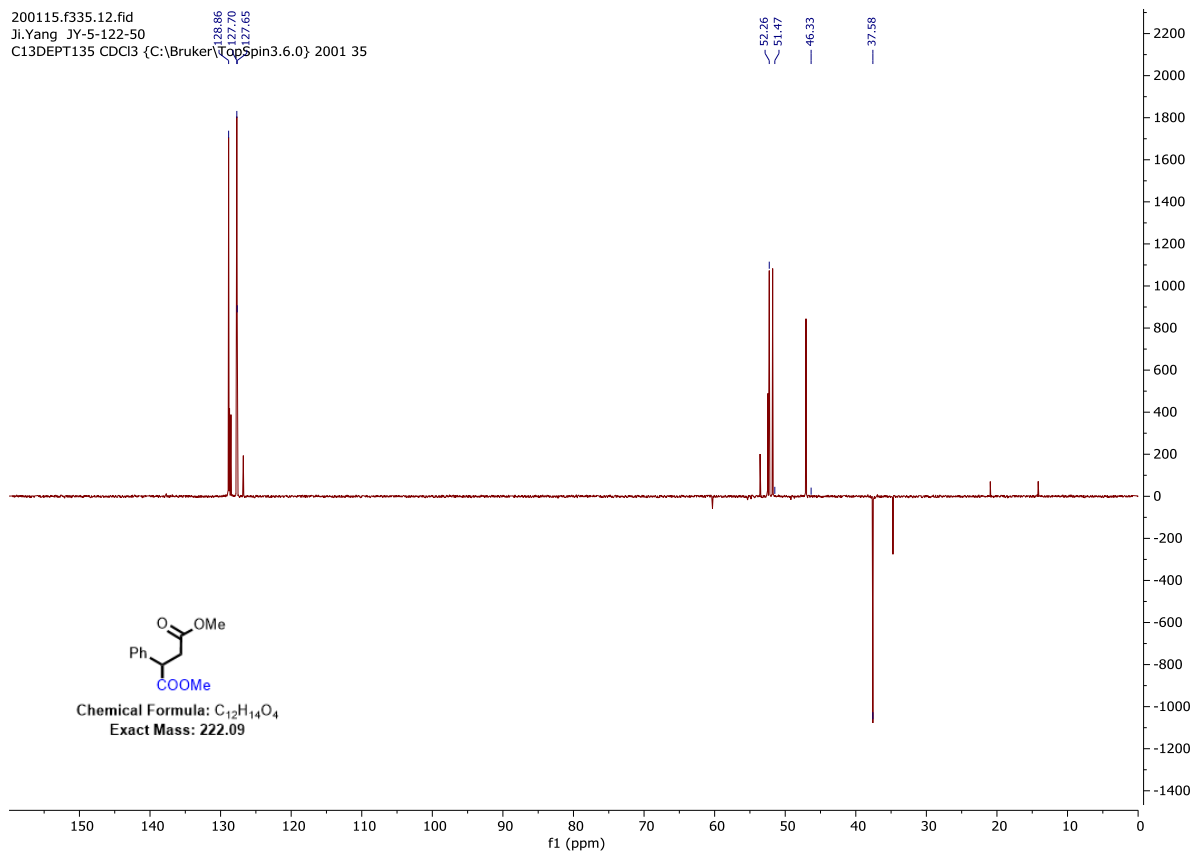

## Chromatogram and Results

| Injection Details    |                 |                                |
|----------------------|-----------------|--------------------------------|
| Injection Name:      | JY-5-122-43-45  | Run Time (min): <b>40,00</b>   |
| Vial Number:         | 73              | Injection Volume: <b>2,00</b>  |
| Injection Type:      | Unknown         | Channel: <b>FrontDetector</b>  |
| Calibration Level:   |                 | Wavelength: <b>n.a.</b>        |
| Instrument Method:   | dong-40min      | Bandwidth: <b>n.a.</b>         |
| Processing Method:   | dong            | Dilution Factor: <b>1,0000</b> |
| Injection Date/Time: | 13.Jan.20 14:30 | Sample Weight: <b>1,0000</b>   |

### Chromatogram

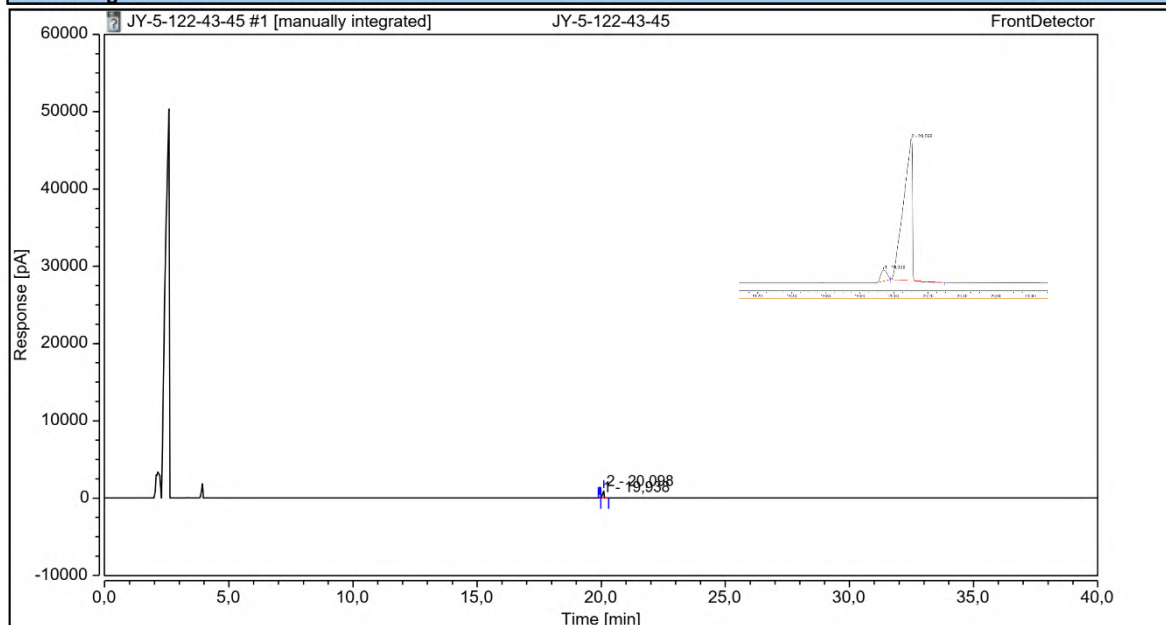

### Integration Results

| No.    | Peak Name   | Retention Time<br>min | Area<br>pA*min | Height<br>pA | Relative Area<br>% | Relative Height<br>% | Amount |
|--------|-------------|-----------------------|----------------|--------------|--------------------|----------------------|--------|
| n.a.   | Component 2 | n.a.                  | n.a.           | n.a.         | n.a.               | n.a.                 | n.a.   |
| n.a.   | Component 3 | n.a.                  | n.a.           | n.a.         | n.a.               | n.a.                 | n.a.   |
| n.a.   | Component 4 | n.a.                  | n.a.           | n.a.         | n.a.               | n.a.                 | n.a.   |
| n.a.   | Component 5 | n.a.                  | n.a.           | n.a.         | n.a.               | n.a.                 | n.a.   |
| 1      |             | 19,938                | 3,040          | 70,365       | 5,31               | 7,24                 | n.a.   |
| 2      |             | 20,098                | 54,255         | 901,678      | 94,69              | 92,76                | n.a.   |
| Total: |             |                       | 57,295         | 972,043      | 100,00             | 100,00               |        |

File :D:\MSDChem\1\DATA\2001\JY-122-43.D  
Operator :  
Acquired : 13 Jan 2020 15:16 using AcqMethod SK3-30X.M  
Instrument : GC-MSD  
Sample Name: JY-122-43  
Misc Info :  
Vial Number: 46

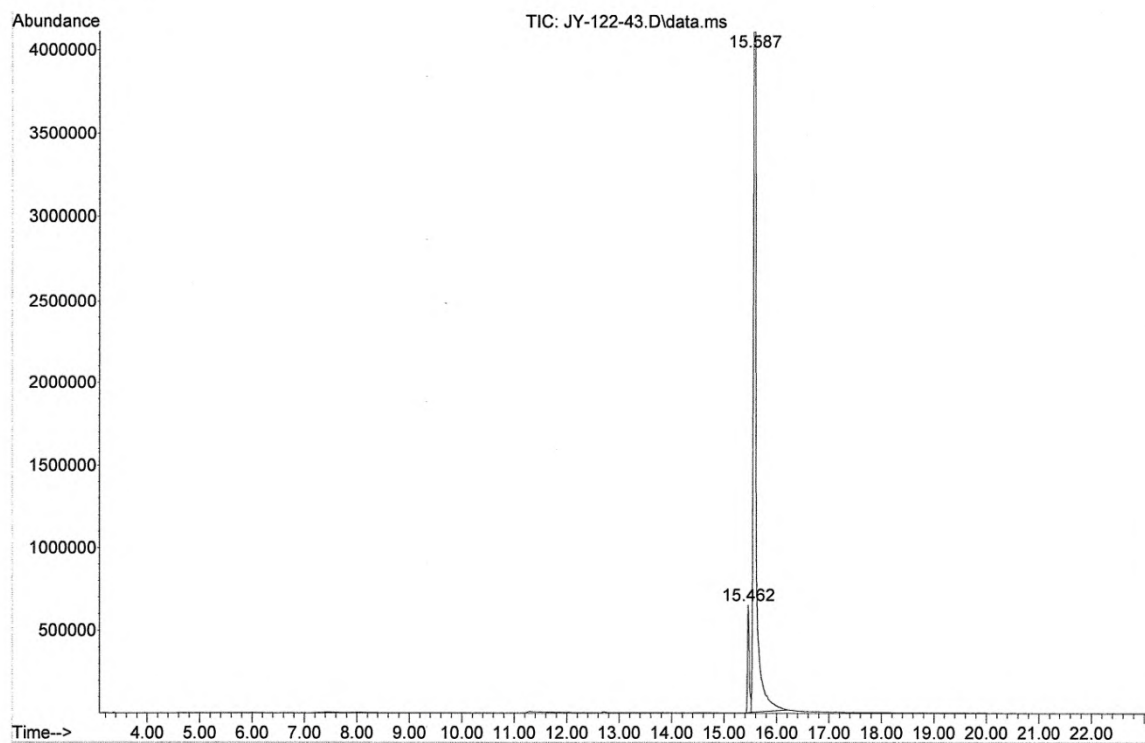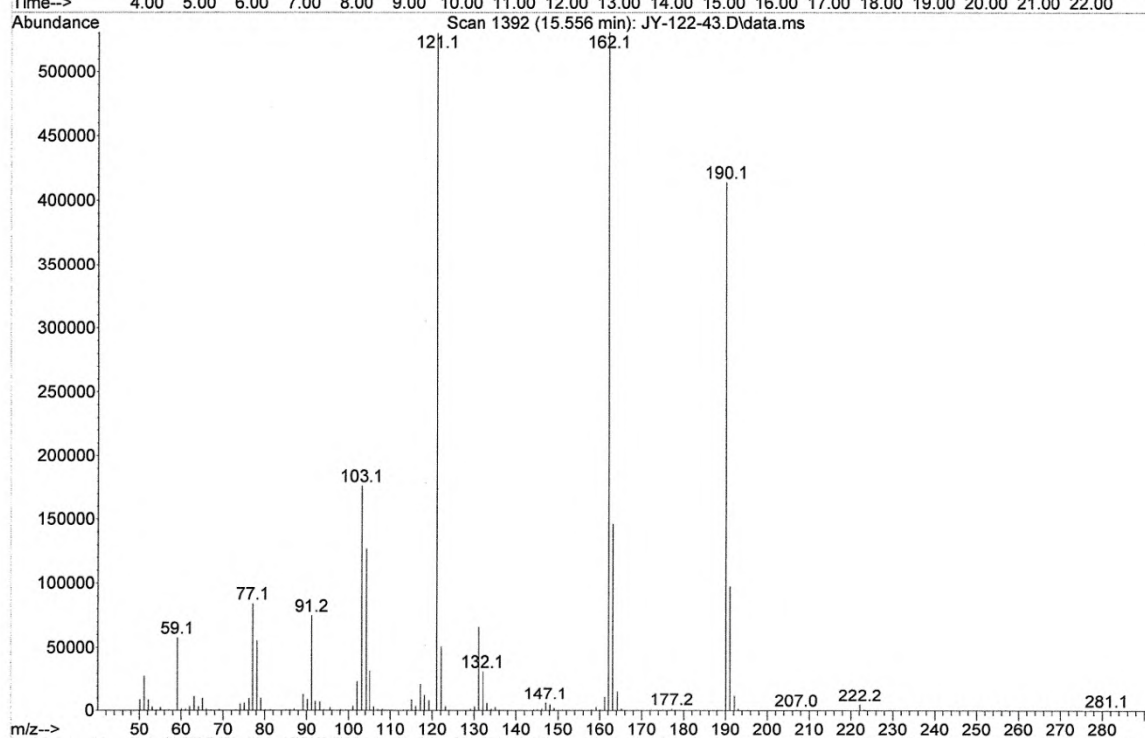

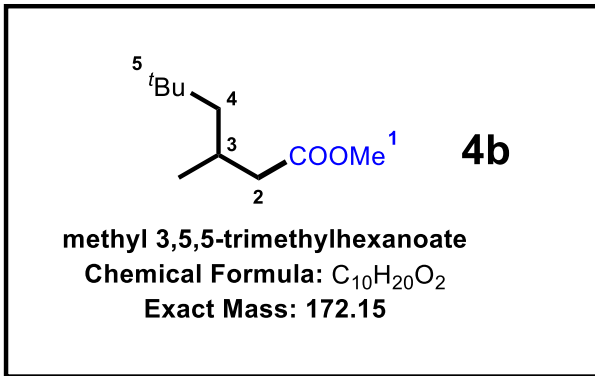

200113.422.10.fid  
 Ji.Yang JY-5-122-37  
 Au1H CDCl3 {C:\Bruker\TopSpin3.5pl6} 2001 22

7.26

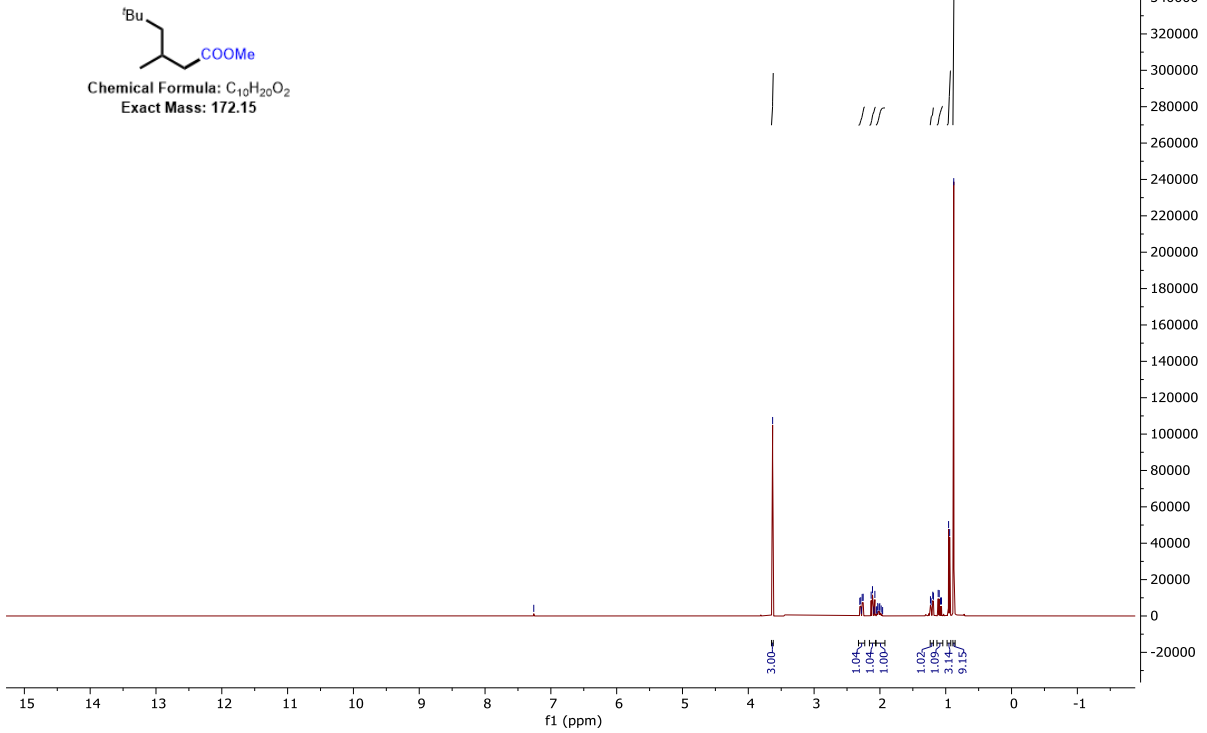

200113.422.11.fid  
Ji.Yang JY-5-122-37  
Au13C CDCl3 {C:\Bruker\TopSpin3.5pl6} 2001 22

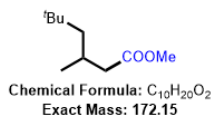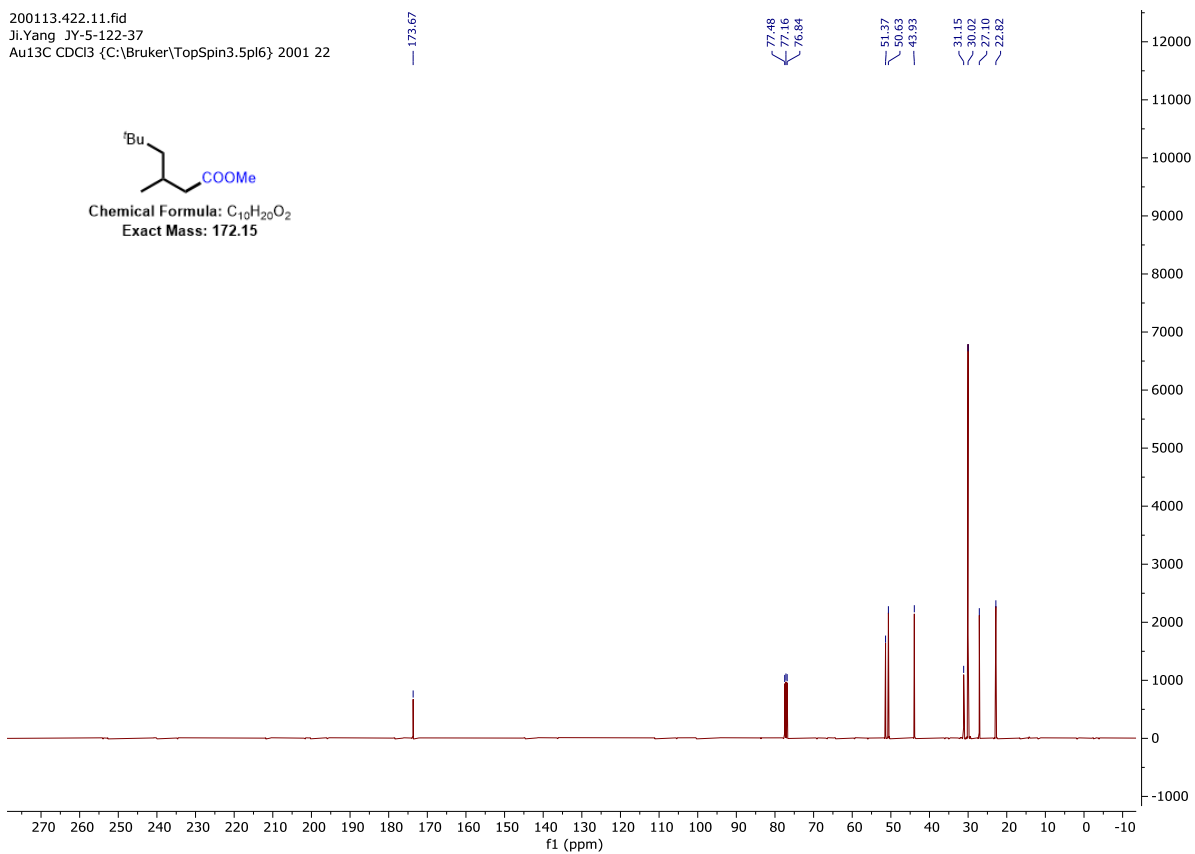

200113.422.12.fid  
Ji.Yang JY-5-122-37  
Au13C-dept CDCl3 {C:\Bruker\TopSpin3.5pl6} 2001 22

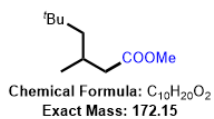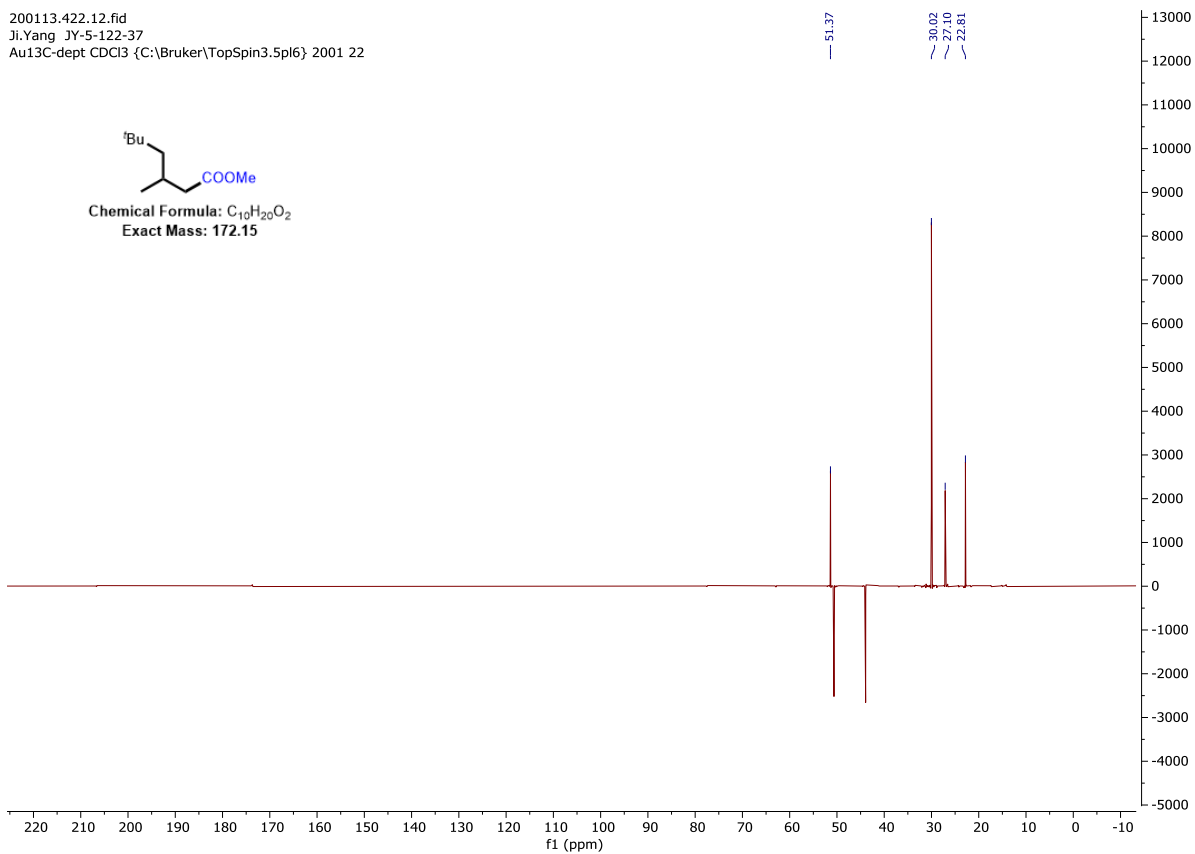

## Chromatogram and Results

### Injection Details

|                      |                   |                   |               |
|----------------------|-------------------|-------------------|---------------|
| Injection Name:      | JY-5-122-27-39-11 | Run Time (min):   | 40,00         |
| Vial Number:         | 35                | Injection Volume: | 2,00          |
| Injection Type:      | Unknown           | Channel:          | FrontDetector |
| Calibration Level:   |                   | Wavelength:       | n.a.          |
| Instrument Method:   | dong-40min        | Bandwidth:        | n.a.          |
| Processing Method:   | dong              | Dilution Factor:  | 1,0000        |
| Injection Date/Time: | 11.Jan.20 23:31   | Sample Weight:    | 1,0000        |

### Chromatogram

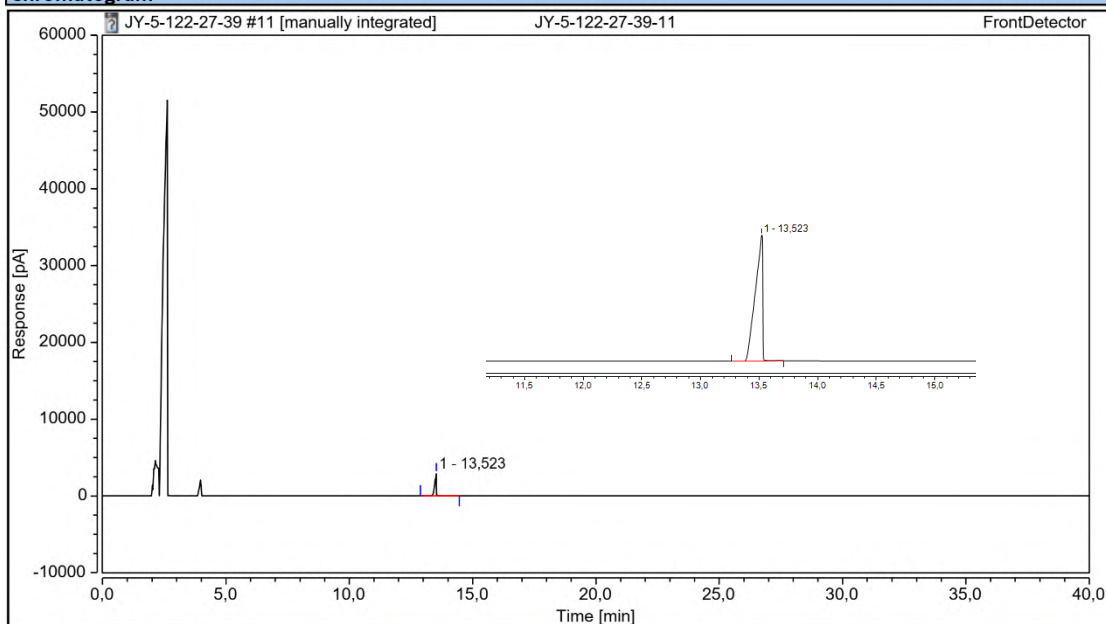

### Integration Results

| No.    | Peak Name   | Retention Time<br>min | Area<br>pA*min | Height<br>pA | Relative Area<br>% | Relative Height<br>% | Amount |
|--------|-------------|-----------------------|----------------|--------------|--------------------|----------------------|--------|
| n.a.   | Component 2 | n.a.                  | n.a.           | n.a.         | n.a.               | n.a.                 | n.a.   |
| n.a.   | Component 3 | n.a.                  | n.a.           | n.a.         | n.a.               | n.a.                 | n.a.   |
| 1      |             | 13,523                | 208,485        | 2869,076     | 100,00             | 100,00               | n.a.   |
| n.a.   | Component 4 | n.a.                  | n.a.           | n.a.         | n.a.               | n.a.                 | n.a.   |
| n.a.   | Component 5 | n.a.                  | n.a.           | n.a.         | n.a.               | n.a.                 | n.a.   |
| Total: |             |                       | 208,485        | 2869,076     | 100,00             | 100,00               |        |



File :D:\MSDCHEM\1\DATA\2001\JY-5-122-37.D  
Operator :  
Acquired : 11 Jan 2020 22:25 using AcqMethod SK3-30X.M  
Instrument : GC-MSD  
Sample Name: JY-5-122-37  
Misc Info :  
Vial Number: 41

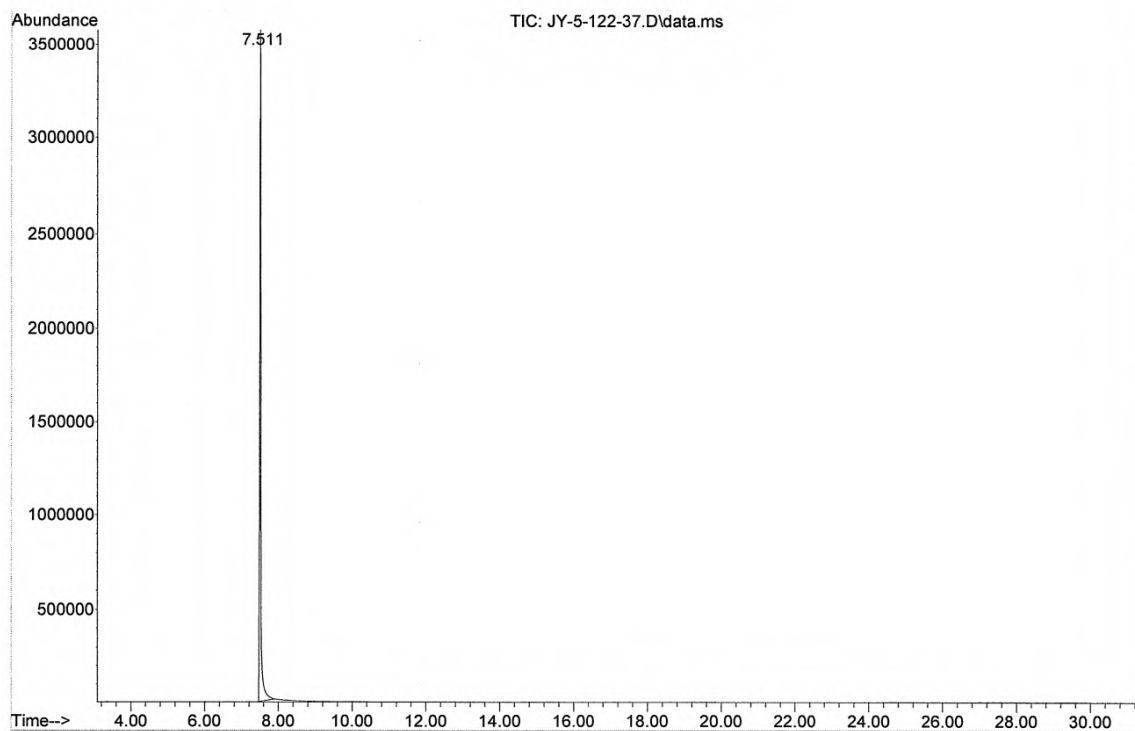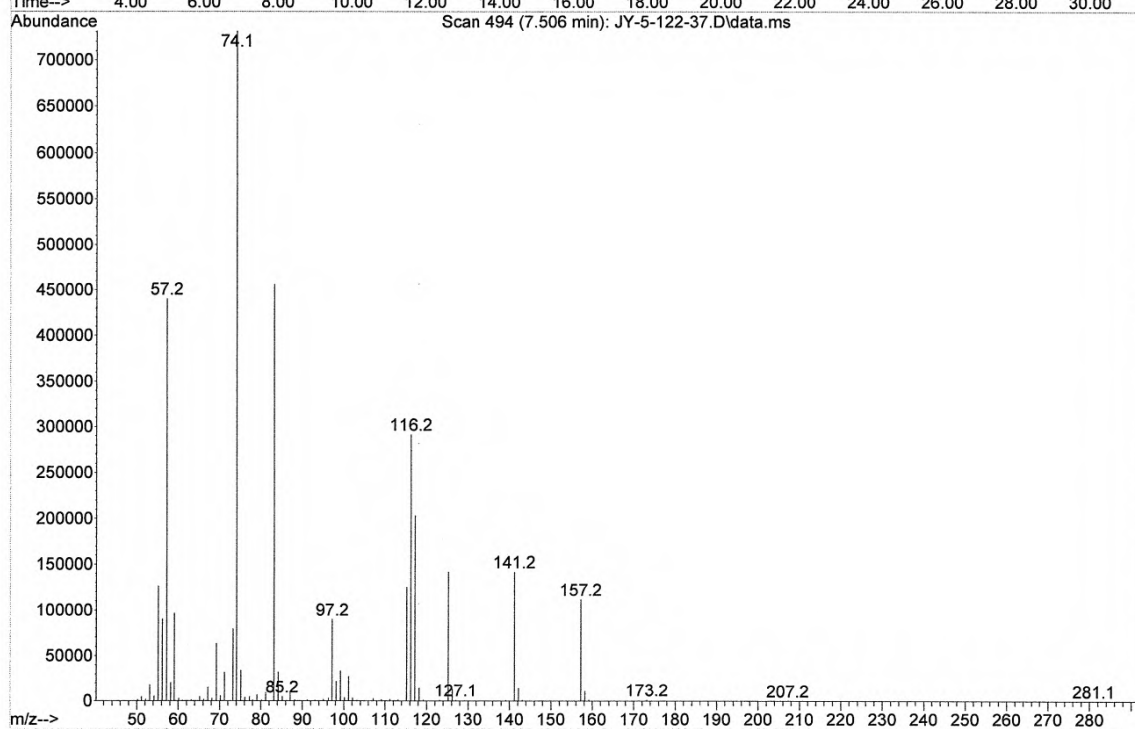

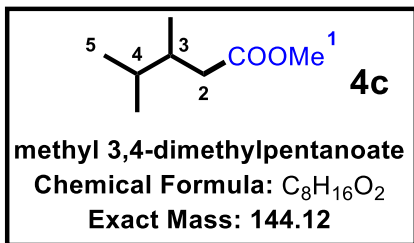

200115.f331.10.fid  
 Ji, Yang JY-5-122-46  
 PROTON CDC13 (C:\Bruker\TopSpin3.6.0) 2001 31

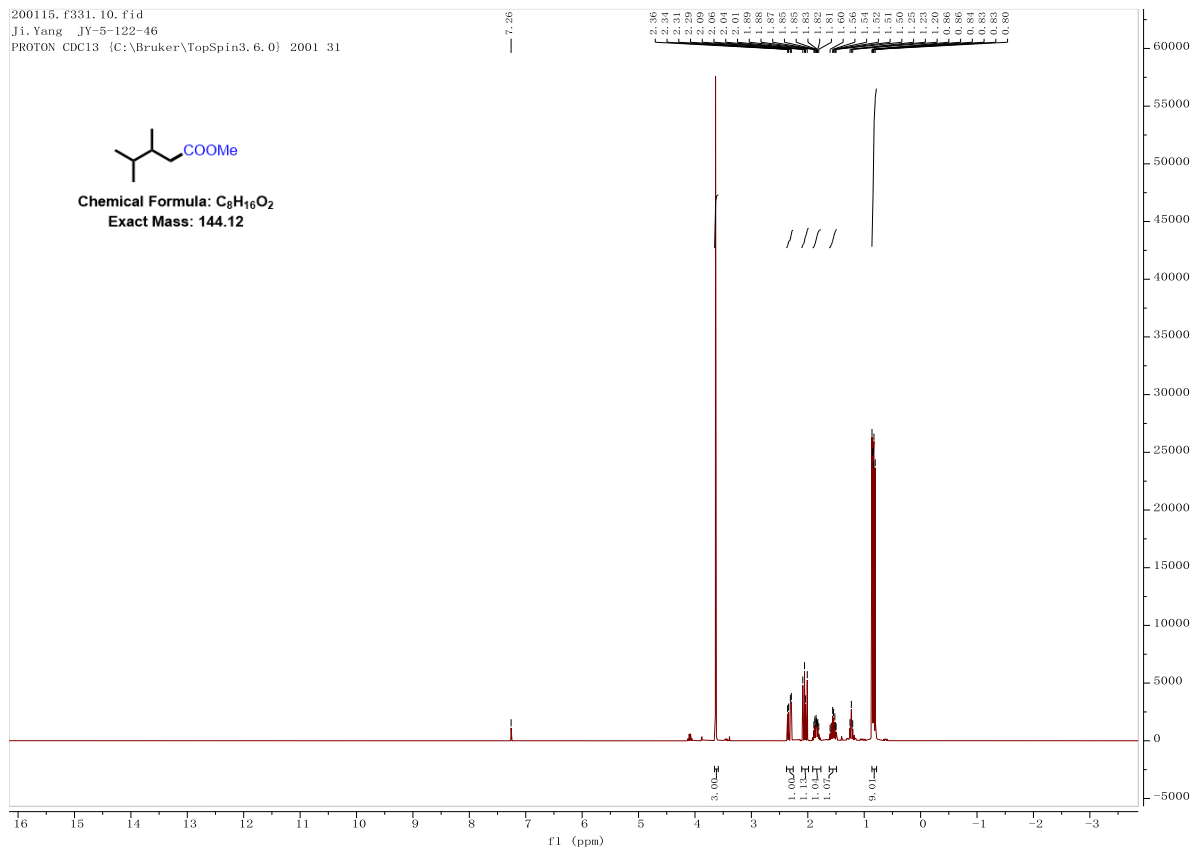

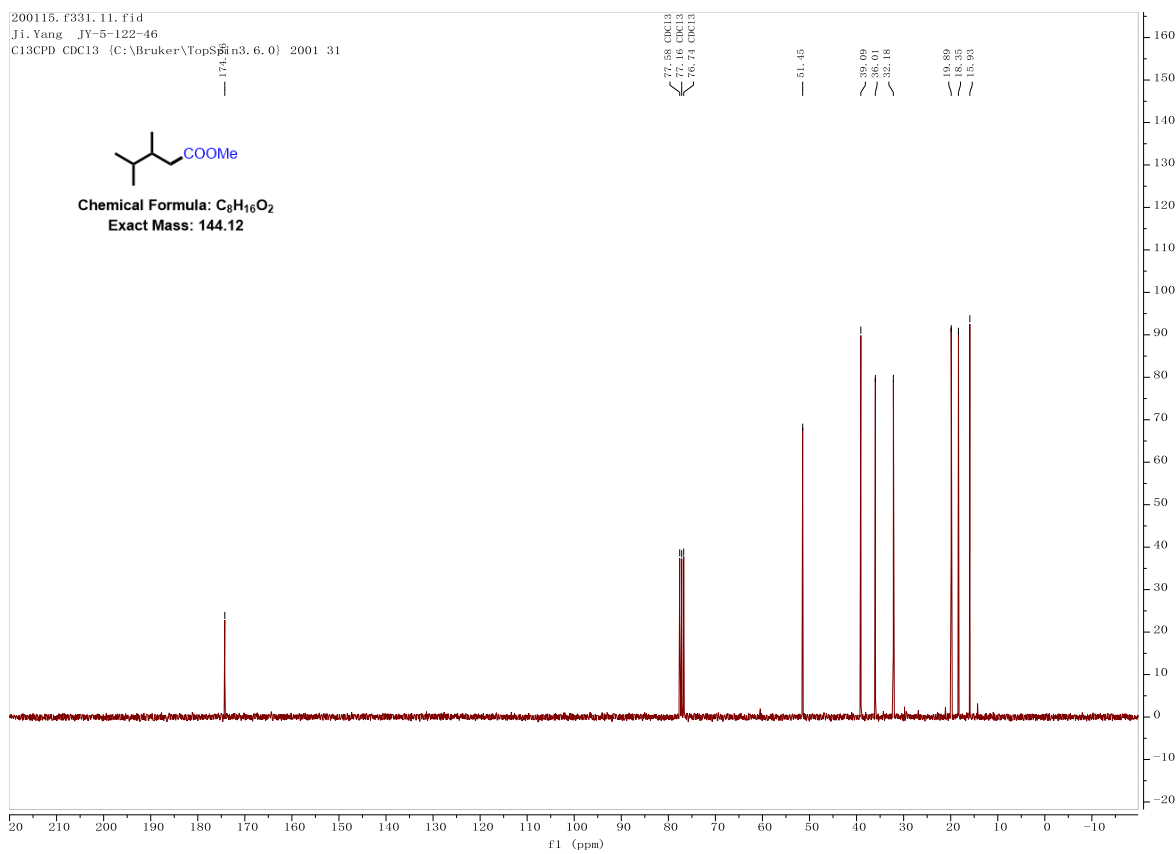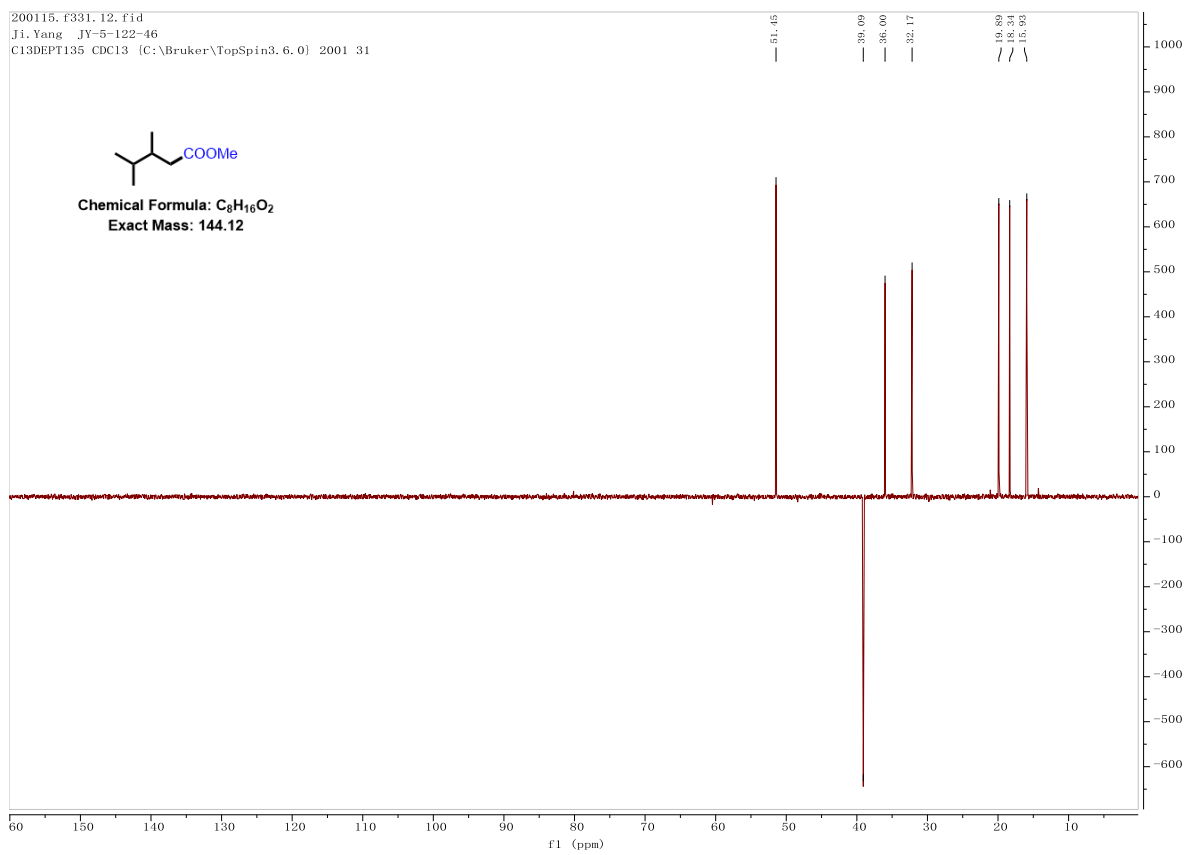

## Chromatogram and Results

| Injection Details    |                 |                         |
|----------------------|-----------------|-------------------------|
| Injection Name:      | JY-5-122-7      | Run Time (min): 40,00   |
| Vial Number:         | 67              | Injection Volume: 2,00  |
| Injection Type:      | Unknown         | Channel: FrontDetector  |
| Calibration Level:   |                 | Wavelength: n.a.        |
| Instrument Method:   | dong-40min      | Bandwidth: n.a.         |
| Processing Method:   | dong            | Dilution Factor: 1,0000 |
| Injection Date/Time: | 09.Jan.20 21:33 | Sample Weight: 1,0000   |

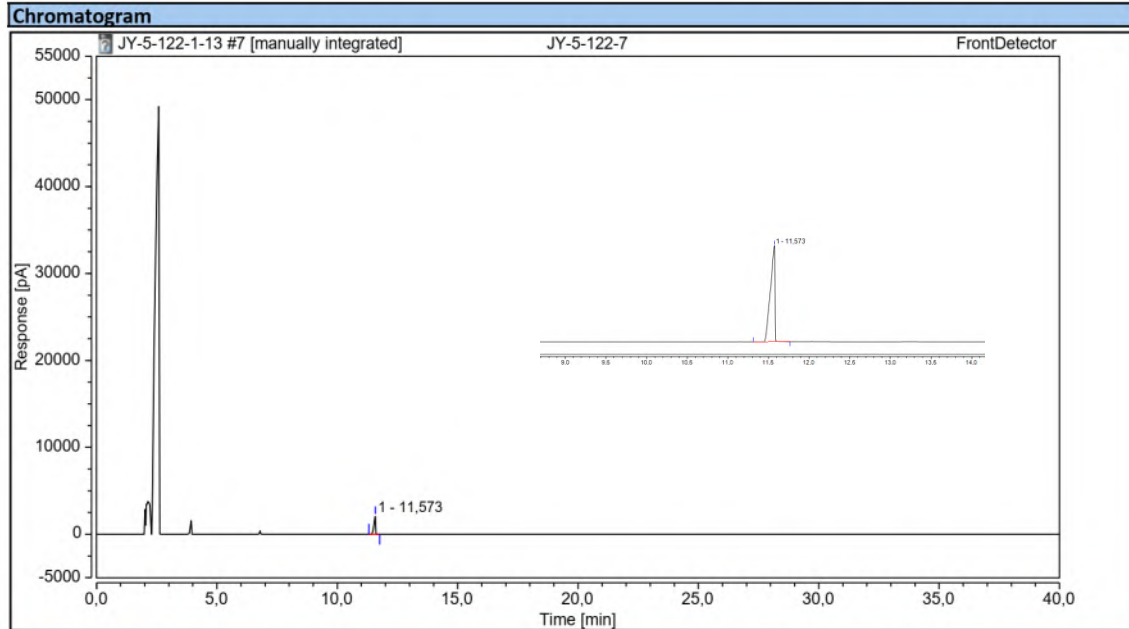

| Integration Results |             |                       |                |              |                    |                      |        |
|---------------------|-------------|-----------------------|----------------|--------------|--------------------|----------------------|--------|
| No.                 | Peak Name   | Retention Time<br>min | Area<br>pA*min | Height<br>pA | Relative Area<br>% | Relative Height<br>% | Amount |
| n.a.                | Component 2 | n.a.                  | n.a.           | n.a.         | n.a.               | n.a.                 | n.a.   |
| n.a.                | Component 3 | n.a.                  | n.a.           | n.a.         | n.a.               | n.a.                 | n.a.   |
| 1                   |             | 11,573                | 127,703        | 2011,701     | 100,00             | 100,00               | n.a.   |
| n.a.                | Component 4 | n.a.                  | n.a.           | n.a.         | n.a.               | n.a.                 | n.a.   |
| n.a.                | Component 5 | n.a.                  | n.a.           | n.a.         | n.a.               | n.a.                 | n.a.   |
| Total:              |             |                       | 127,703        | 2011,701     | 100,00             | 100,00               |        |

File :D:\MSDCHEM\1\DATA\2001\JY-5-122-7.D  
Operator :  
Acquired : 9 Jan 2020 19:01 using AcqMethod SK3-30X.M  
Instrument : GC-MSD  
Sample Name: JY-5-122-7  
Misc Info :  
Vial Number: 42

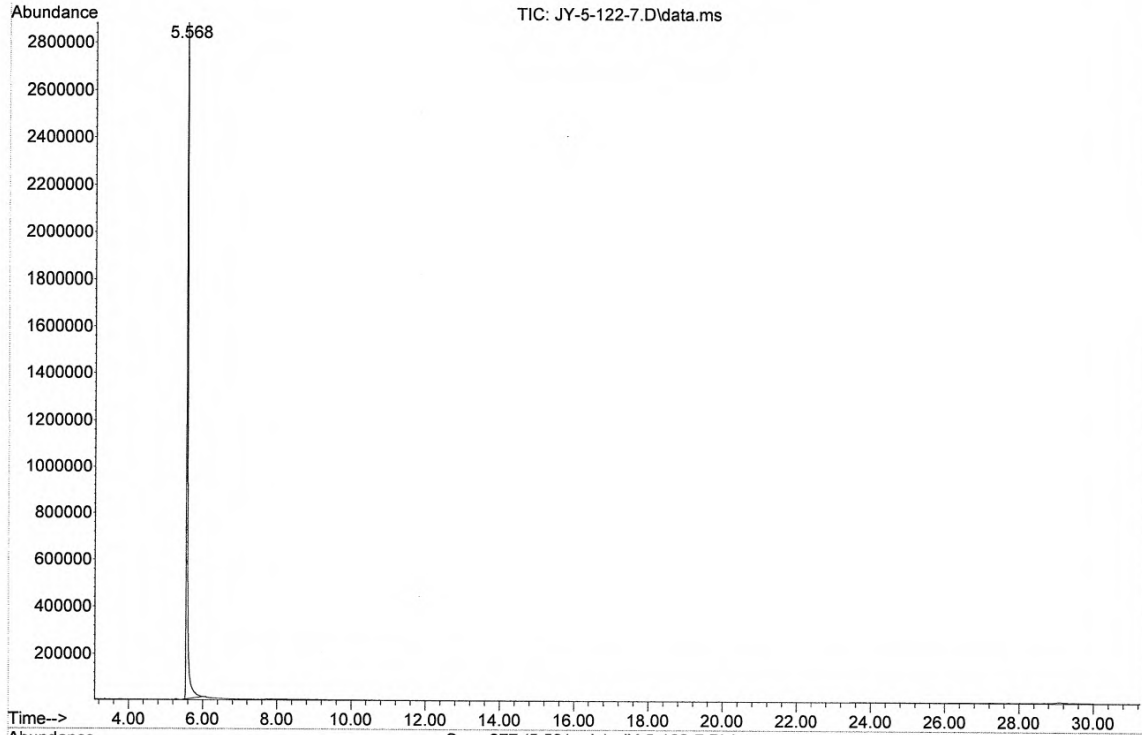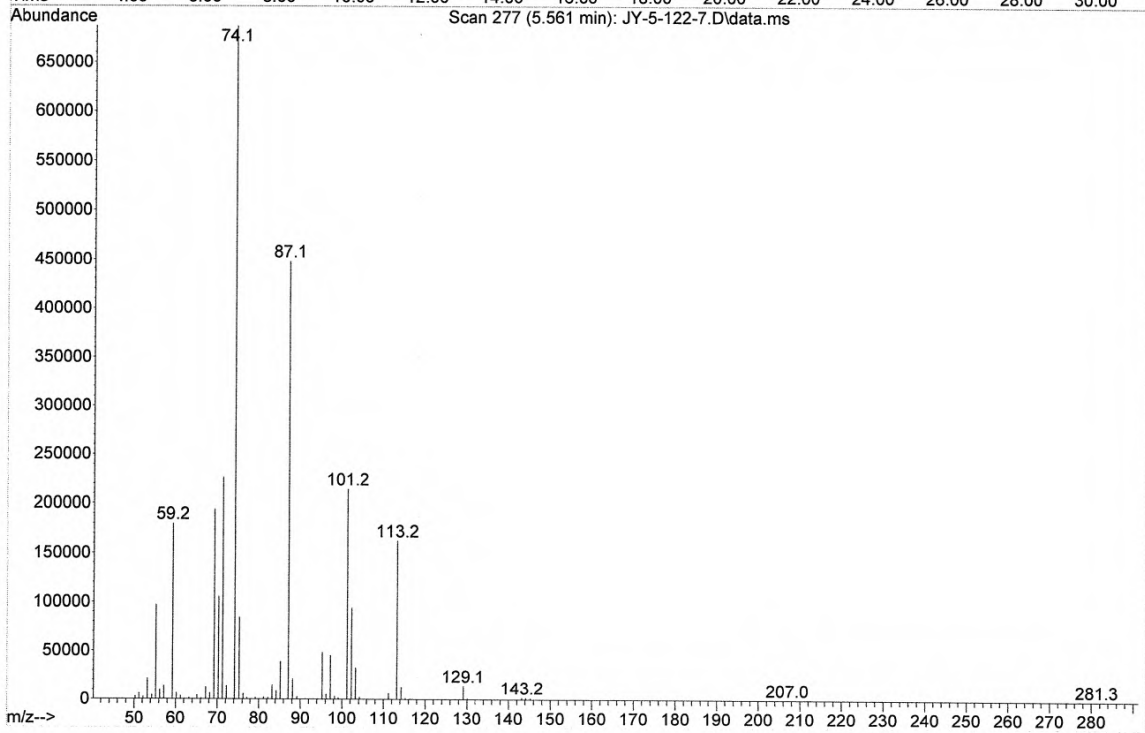

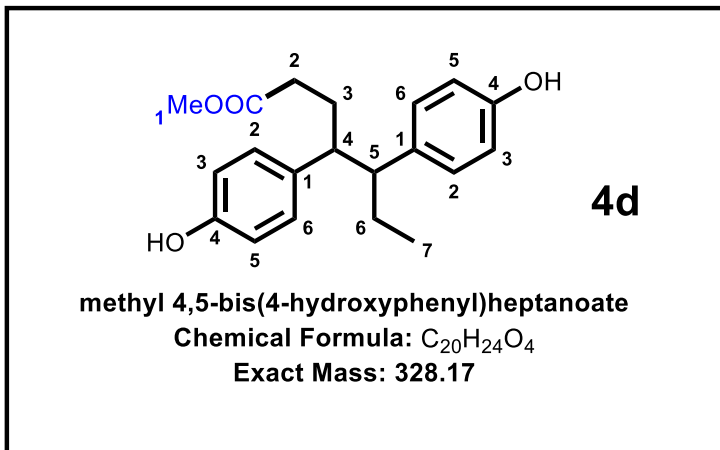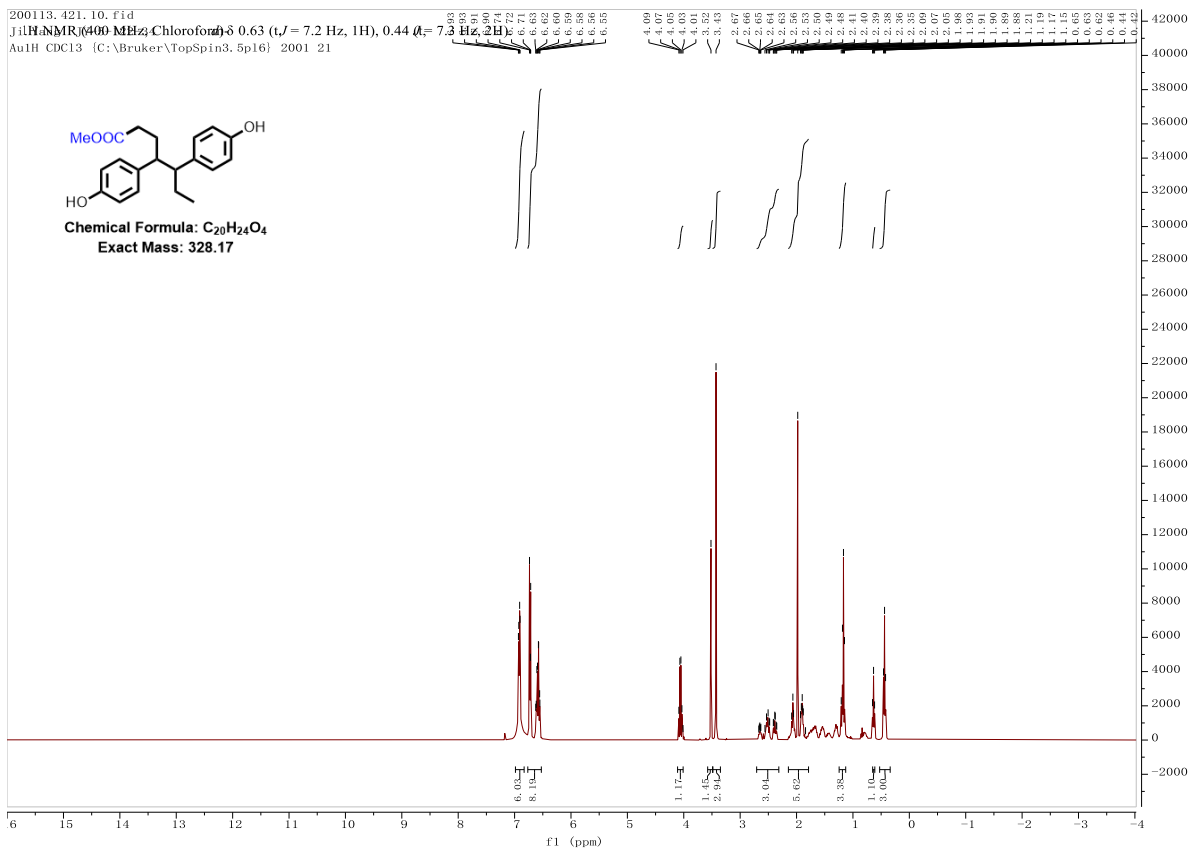

200113.421.11.fid  
 Ji, Yang JY-5-122-34  
 Au13C CDC13 [C:\Bruker\TopSpin3.5p16] 2001 21

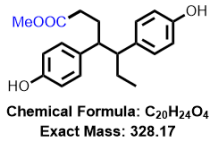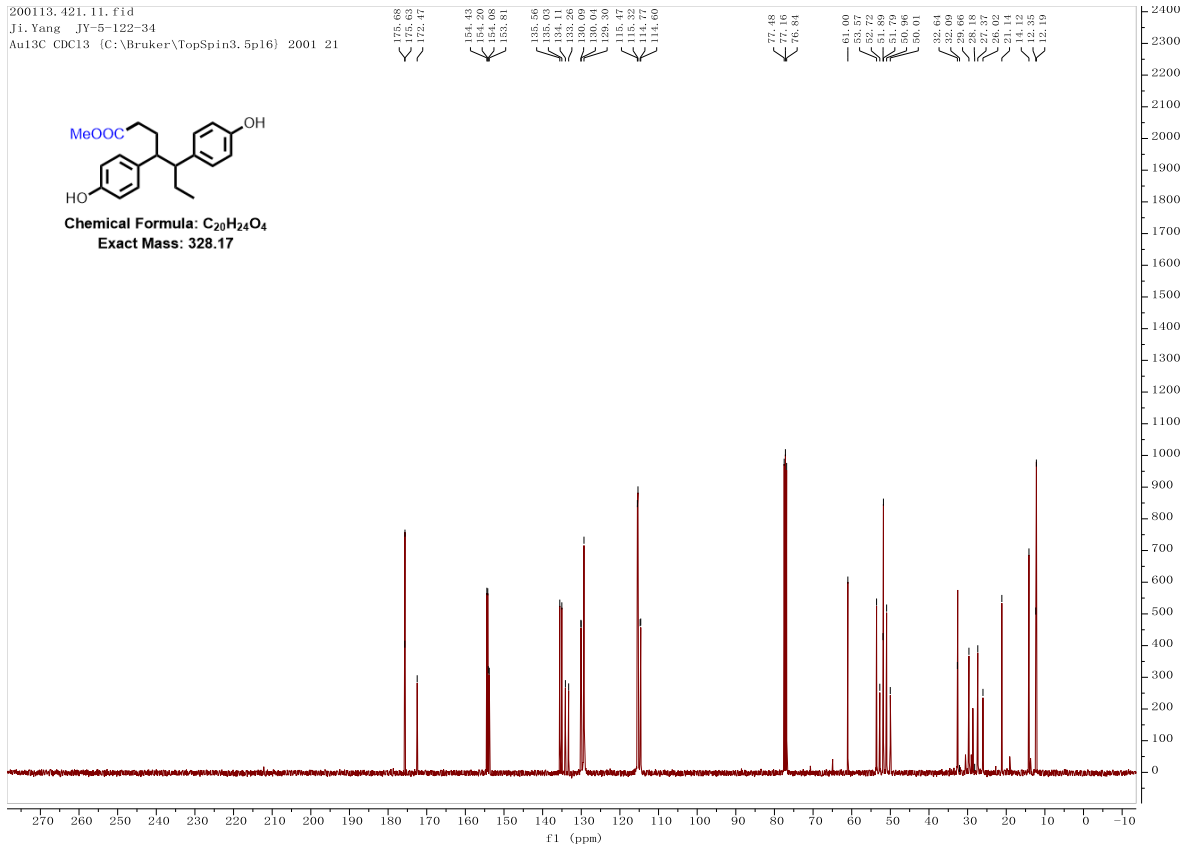

200113.421.12.fid  
 Ji, Yang JY-5-122-34  
 Au13C-dept CDC13 [C:\Bruker\TopSpin3.5p16] 2001 21

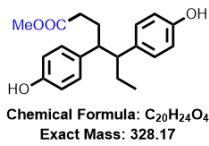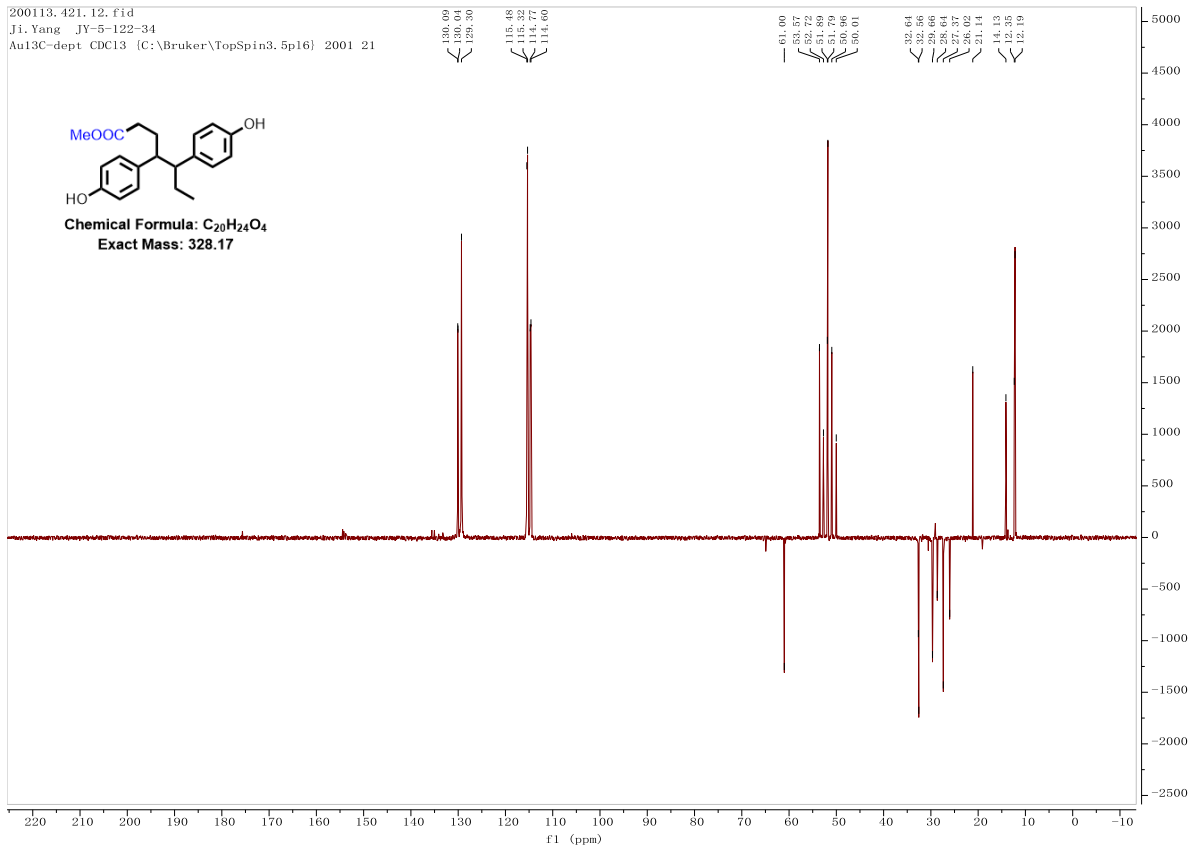

## Chromatogram and Results

| Injection Details    |                  |                         |
|----------------------|------------------|-------------------------|
| Injection Name:      | JY-5-122-27-39-8 | Run Time (min): 40,00   |
| Vial Number:         | 32               | Injection Volume: 2,00  |
| Injection Type:      | Unknown          | Channel: FrontDetector  |
| Calibration Level:   |                  | Wavelength: n.a.        |
| Instrument Method:   | dong-40min       | Bandwidth: n.a.         |
| Processing Method:   | dong             | Dilution Factor: 1,0000 |
| Injection Date/Time: | 11.Jan.20 20:29  | Sample Weight: 1,0000   |

### Chromatogram

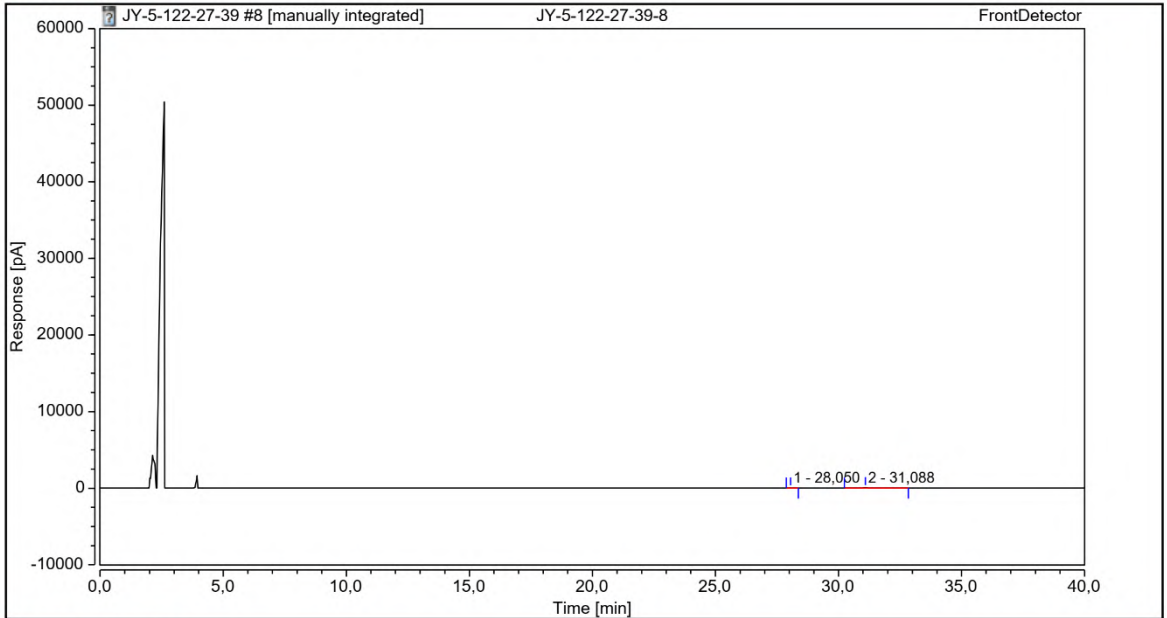

### Integration Results

| No.           | Peak Name   | Retention Time<br>min | Area<br>pA*min | Height<br>pA  | Relative Area<br>% | Relative Height<br>% | Amount |
|---------------|-------------|-----------------------|----------------|---------------|--------------------|----------------------|--------|
| n.a.          | Component 2 | n.a.                  | n.a.           | n.a.          | n.a.               | n.a.                 | n.a.   |
| n.a.          | Component 3 | n.a.                  | n.a.           | n.a.          | n.a.               | n.a.                 | n.a.   |
| n.a.          | Component 4 | n.a.                  | n.a.           | n.a.          | n.a.               | n.a.                 | n.a.   |
| n.a.          | Component 5 | n.a.                  | n.a.           | n.a.          | n.a.               | n.a.                 | n.a.   |
| 1             |             | 28,050                | 1,870          | 11,640        | 10,30              | 22,28                | n.a.   |
| 2             |             | 31,088                | 16,286         | 40,616        | 89,70              | 77,72                | n.a.   |
| <b>Total:</b> |             |                       | <b>18,156</b>  | <b>52,256</b> | <b>100,00</b>      | <b>100,00</b>        |        |



File :D:\MSDCHEM\1\DATA\2001\JY-5-122-34.D  
Operator :  
Acquired : 11 Jan 2020 20:13 using AcqMethod SK3-45X.M  
Instrument : GC-MSD  
Sample Name: JY-5-122-34  
Misc Info :  
Vial Number: 38

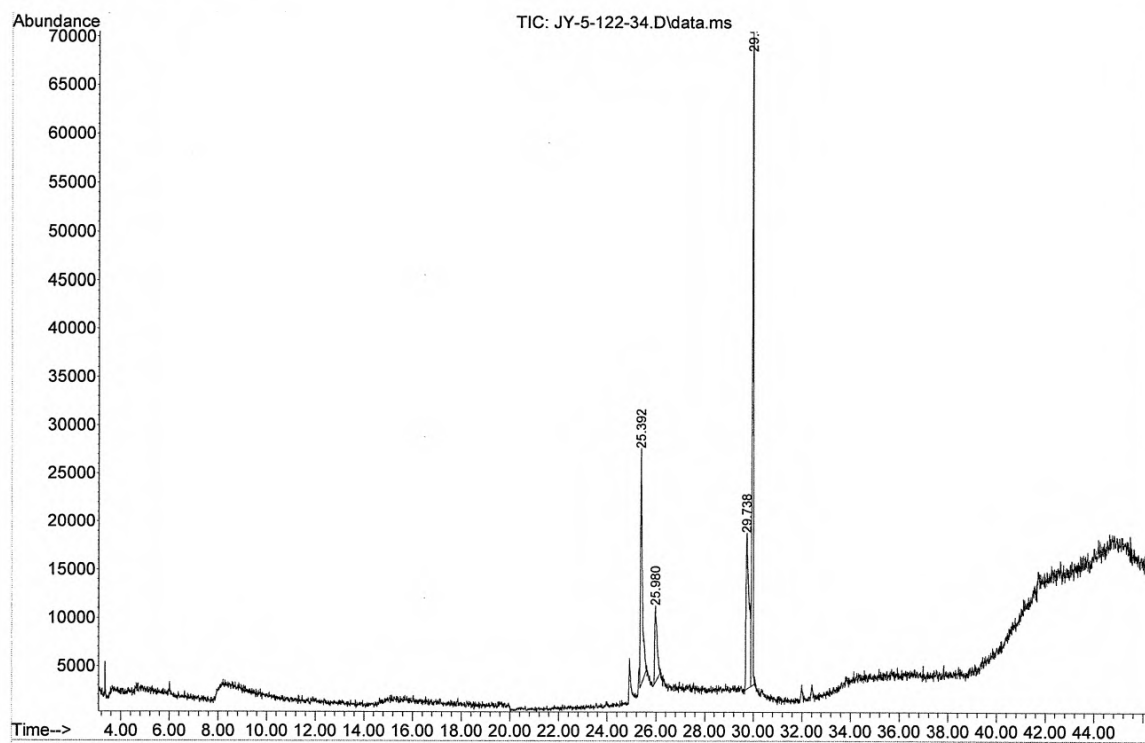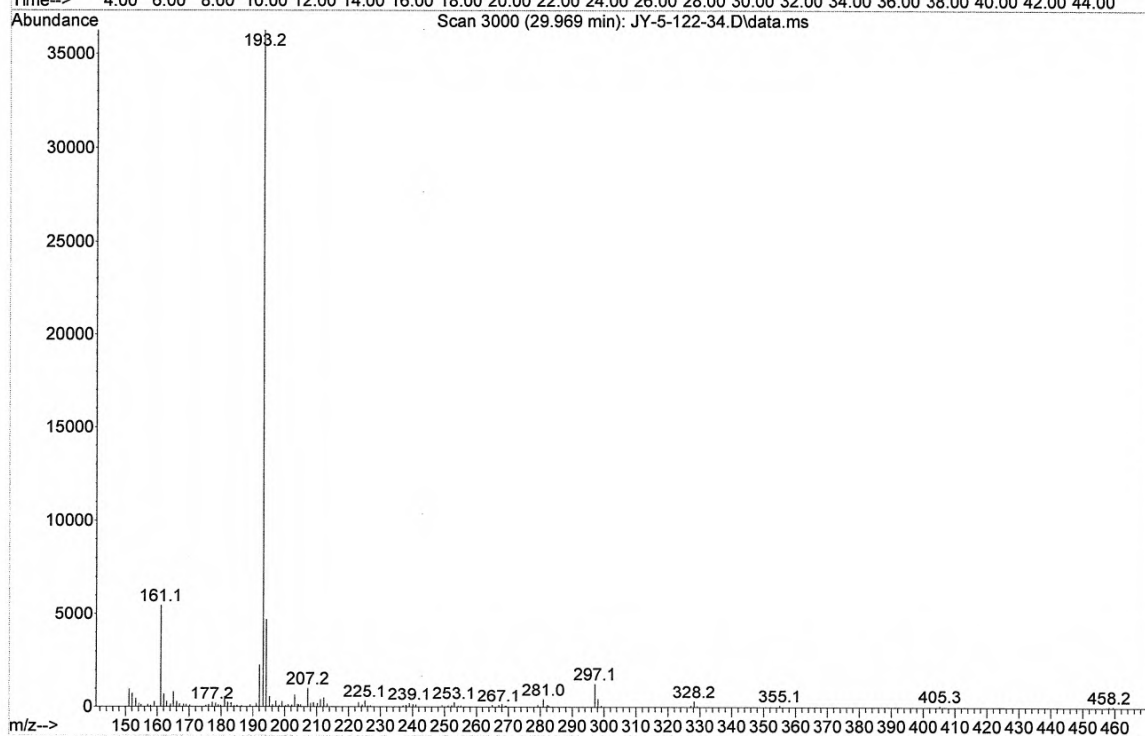

Supplement: d0cc00650e1.pdf [file d0cc00650e1.pdf]
